# Supplementary material
Source: publisher figshare collection journal article supplement (https://acs.figshare.com/ndownloader/files/7578883)
Supplement: Supplementary file 1 [file 7578883]

## Sheet: d35_vs_d0_1exp>1pept
Protein Names	Protein IDs	Majority Protein IDs	Gene Names	Uniprot	t-test p-value	significantly regulated?	log2 mean Ratio d35/d0	Replicate1 log2 (Ratio d35/d0 Normalized)	Replicate2 log2 (Ratio d35/d0 Normalized)	Replicate3 log2 (Ratio d35/d0 Normalized)	mean Ratio d35/d0	standard deviation	Replicate1 Ratio d35/d0 Normalized	Replicate2 Ratio d35/d0 Normalized	Replicate3 Ratio d35/d0 Normalized	Replicate1 Peptides	Replicate2 Peptides	Replicate3 Peptides	Mol. Weight [kDa]	Sequence Length	Replicate1 Sequence Coverage [%]	Replicate2 Sequence Coverage [%]	Replicate3 Sequence Coverage [%]	Ratio M/L Variability [%]	Ratio H/L Variability [%]	Ratio H/M Variability [%]	Replicate1 Ratio M/L Variability [%]	Replicate1 Ratio H/L Variability [%]	Replicate1 Ratio H/M Variability [%]	Replicate2 Ratio M/L Variability [%]	Replicate2 Ratio H/L Variability [%]	Replicate2 Ratio H/M Variability [%]	Replicate3 Ratio M/L Variability [%]	Replicate3 Ratio H/L Variability [%]	Replicate3 Ratio H/M Variability [%]	Replicate1 Intensity L	Replicate1 Intensity M	Replicate1 Intensity H	Replicate2 Intensity L	Replicate2 Intensity M	Replicate2 Intensity H	Replicate3 Intensity L	Replicate3 Intensity M	Replicate3 Intensity H
(Mt)TrpRS;Tryptophan--tRNA ligase;Tryptophanyl-tRNA synthetase, mitochondrial;cDNA FLJ50844, highly similar to Tryptophanyl-tRNA synthetase, mitochondrial (EC 6.1.1.2);cDNA FLJ53098, highly similar to Tryptophanyl-tRNA synthetase, mitochondrial (EC 6.1.1.2)	IPI00025050;IPI00921958;IPI00397465;IPI00922429	IPI00025050;IPI00921958	WARS2	Q9UGM6;B7Z5X7;B7Z6G7	0.738298		-0.115145	0.148999	-0.379288		0.92329	0.240404	1.1088	0.768817		2	1	0	40.146	360	7.8	4.7	0	129.37	86.803	57.615	40.319	5.3931	44.377							1561200	1196300	1560900	561980	2378700	644640	0	0	0
(S)-3-amino-2-methylpropionate transaminase;4-aminobutyrate aminotransferase, mitochondrial;GABA aminotransferase;Gamma-amino-N-butyrate transaminase;L-AIBAT;cDNA FLJ56034, highly similar to 4-aminobutyrate aminotransferase, mitochondrial (EC 2.6.1.19)	IPI00009532	IPI00009532	ABAT;GABAT	P80404;B7Z1V4	0.12264		2.89161		3.45565	2.32757	7.42096	4.20841		10.9712	5.01958	0	2	4	58.228	515	0	7.2	11.8	161.96	173.94	237.82				219.45	208.44	14.323	146.97	127.29	38.124	0	0	0	15272000	4900200	4983700	547120	2196700	900510
[3-methyl-2-oxobutanoate dehydrogenase [lipoamide]] kinase, mitochondrial;Branched-chain alpha-ketoacid dehydrogenase kinase;BCKDK protein;Branched chain ketoacid dehydrogenase kinase, isoform CRA_a;Branched chain ketoacid dehydrogenase kinase, isoform CRA_c;Putative uncharacterized protein BCKDK;cDNA FLJ60500, highly similar to 3-methyl-2-oxobutanoate dehydrogenase (lipoamide) kinase (EC2.7.11.4)	IPI00298612;IPI00062344;IPI00643414;IPI00910522	IPI00298612;IPI00062344;IPI00643414;IPI00910522	BCKDK;hCG_21145	O14874;Q96G95;A8MY43;B4DGN9	0.243242		-0.864512	-1.2119	-0.517124		0.549232	0.188842	0.4317	0.698763		6	4	0	46.36	412	16.7	11.2	0	118.91	86.097	111.06	97.077	84.565	29.259	70.876	72.016	13.874				4298300	6656000	3154000	4487400	10360000	2663500	0	0	0
[Acyl-carrier-protein] S-acetyltransferase;[Acyl-carrier-protein] S-malonyltransferase;3-hydroxypalmitoyl-[acyl-carrier-protein] dehydratase;3-oxoacyl-[acyl-carrier-protein] reductase;3-oxoacyl-[acyl-carrier-protein] synthase;Enoyl-[acyl-carrier-protein] reductase;Fatty acid synthase;Oleoyl-[acyl-carrier-protein] hydrolase;FASN protein	IPI00026781	IPI00026781	FAS;FASN	P49327;Q13587;Q6PJJ3	0.349486		-0.18548	-0.39779	-0.270469	0.11182	0.879357	0.169108	0.75902	0.82905	1.08059	58	50	11	273.42	2511	28.6	24.7	6.8	116.48	118.23	92.08	118.98	109.17	38.972	95.476	107.52	71.411	87.267	78.07	33.624	99958000	124750000	88368000	81697000	313710000	291770000	150940000	607430000	641180000
[Protein ADP-ribosylarginine] hydrolase-like protein 1;ADP-ribosylhydrolase 2	IPI00168620;IPI00396530;IPI00479457;IPI00009258;IPI00910700	IPI00168620;IPI00396530;IPI00479457	ADPRHL1;ARH2	Q8NDY3-1;Q8NDY3;Q8NDY3-2	0.148932		3.19021		2.42996	3.95045	9.12741	7.12125		5.3888	15.4598	0	2	3	40.104	354	0	4.8	10.7	172.44	174.41	259.77				49.648	31.335	18.681	338.54	155.61	62.628	0	0	0	2973300	4259500	13156000	2933000	5850200	2657300
[Protein ADP-ribosylarginine] hydrolase-like protein 2;ADP-ribosylhydrolase 3;Poly(ADP-ribose) glycohydrolase ARH3;cDNA FLJ51852, highly similar to Homo sapiens ADP-ribosylhydrolase like 2 (ADPRHL2), mRNA;ADP-ribosylhydrolase like 2, isoform CRA_a;cDNA, FLJ79248, highly similar to Homo sapiens ADP-ribosylhydrolase like 2 (ADPRHL2), mRNA	IPI00015865;IPI00396418;REV__IPI00015011;REV__IPI00394987	IPI00015865	ADPRHL2;ARH3;hCG_38289	Q9NX46;B4DHV5;B7ZAN4	0.0211265	+	2.11771	1.89666	1.72142	2.73504	4.34004	1.82949	3.7235	3.29761	6.65779	3	3	4	38.946	363	8.5	11.6	19.8	104.24	146.78	162.04	103.42	18.876	141.34	42.54	64.223	14.358	202.66	142.91	47.035	273320	2804600	1769600	1807600	12318000	8259200	1648400	5780300	5018100
[Pyruvate dehydrogenase [lipoamide]] kinase isozyme 1, mitochondrial;Pyruvate dehydrogenase kinase isoform 1;cDNA FLJ51566, highly similar to Pyruvate dehydrogenase (lipoamide) kinase isozyme 1 (EC 2.7.11.2);cDNA FLJ51565, highly similar to Pyruvate dehydrogenase (lipoamide) kinase isozyme 1 (EC 2.7.11.2);Putative uncharacterized protein PDK1;cDNA FLJ53961, highly similar to Pyruvate dehydrogenas…	IPI00014831;IPI00655704;IPI00917984;IPI00917149;IPI00915816;IPI00917849	IPI00014831;IPI00655704;IPI00917984	PDK1	Q15118;B7Z207;B7Z7N6;Q53R49;B7Z937;Q308M4;C9JKT3	0.0345335	+	1.2288	0.763241	1.41296	1.51021	2.34373	0.618065	1.6973	2.66283	2.84852	4	4	1	49.244	436	10.6	11	2.5	88.282	88.402	78.407	43.734	72.764	33.798	120.38	118.02	9.5305				4890400	3734300	12533000	10789000	7569200	40678000	466180	459080	467600
1,4-alpha-glucan-branching enzyme;Brancher enzyme;Glycogen-branching enzyme;cDNA FLJ43930 fis, clone TESTI4013441, highly similar to 1,4-alpha-glucan branching enzyme (EC 2.4.1.18);Glucan , branching enzyme 1 variant;cDNA FLJ57129, highly similar to 1,4-alpha-glucan branching enzyme (EC 2.4.1.18);cDNA FLJ59760, highly similar to 1,4-alpha-glucan branching enzyme (EC 2.4.1.18)	IPI00296635;IPI00789251;IPI00789548;IPI00060146	IPI00296635;IPI00789251	GBE1	Q04446;B3KWV3;Q59ET0;B4DNJ3;B4DUF1	0.0120104	+	1.51543	1.56135	1.20493	1.78002	2.85885	0.566478	2.9513	2.30526	3.4343	7	7	9	80.459	702	15	14.8	18.2	111.88	92.634	147.05	47.892	31.544	17.452	38.813	33.766	10.145	115.42	63.099	36.98	9098800	16867000	22561000	9520600	22487000	11253000	700780	2036300	1079100
100 kDa coactivator;EBNA2 coactivator p100;p100 co-activator;Staphylococcal nuclease domain-containing protein 1;Tudor domain-containing protein 11;cDNA, FLJ92620, highly similar to Homo sapiens staphylococcal nuclease domain containing 1 (SND1),mRNA;cDNA FLJ39264 fis, clone OCBBF2009603, highly similar to Staphylococcal nuclease domain-containing protein 1;EBNA-2 co-activator variant;cDNA FLJ545…	IPI00140420;IPI00910438;IPI00945024;REV__IPI00001767;REV__IPI00884189;REV__IPI00001772;REV__IPI00001769;IPI00185568;REV__IPI00168041	IPI00140420;IPI00910438	SND1;TDRD11	Q7KZF4;B2R5U1;B3KU67;Q59FF0;B4E299;Q86UF7	0.806976		0.0634054	-0.237456	-0.0827026	0.510375	1.04493	0.30869	0.84824	0.944287	1.42442	43	44	36	102	910	49.6	51.4	43.5	122.36	119.86	41.413	112.36	92.224	35.761	79.048	107.28	67.789	145.52	136.17	31.275	120730000	311450000	220100000	64617000	288570000	312500000	258220000	984550000	985600000
100 kDa coated vesicle protein A;Adapter-related protein complex 2 alpha-1 subunit;Adaptor protein complex AP-2 subunit alpha-1;Alpha1-adaptin;Alpha-adaptin A;AP-2 complex subunit alpha-1;Clathrin assembly protein complex 2 alpha-A large chain;Plasma membrane adaptor HA2/AP2 adaptin alpha A subunit;cDNA FLJ36998 fis, clone BRACE2007295, highly similar to ALPHA-ADAPTIN A	IPI00304577;IPI00256684;IPI00953149;IPI00909810	IPI00304577;IPI00256684;IPI00953149	ADTAA;AP2A1;CLAPA1	O95782-1;O95782;Q8N9K4;O95782-2	0.647174		-0.16338	-0.0973789	-0.723952	0.331191	0.892931	0.326312	0.93473	0.605437	1.25805	28	22	3	107.54	977	34.2	25.7	3.7	105.36	92.363	54.81	116.78	94.368	50.889	90.47	84.276	23.253	108.87	118.57	17.006	40756000	56341000	57495000	24518000	59526000	32048000	8047300	15745000	44405000
100 kDa coated vesicle protein C;Adapter-related protein complex 2 alpha-2 subunit;Adaptor protein complex AP-2 subunit alpha-2;Alpha2-adaptin;Alpha-adaptin C;AP-2 complex subunit alpha-2;Clathrin assembly protein complex 2 alpha-C large chain;Huntingtin yeast partner J;Huntingtin-interacting protein 9;Huntingtin-interacting protein J;Plasma membrane adaptor HA2/AP2 adaptin alpha C subunit;cDNA F…	IPI00914938;IPI00016621;IPI00914952;IPI00943035;IPI00952763;IPI00902707;IPI00166396;IPI00556111	IPI00914938;IPI00016621;IPI00914952;IPI00943035;IPI00952763	ADTAB;AP2A2;CLAPA2;HIP9;HYPJ;KIAA0899;DKFZp564D1864	O94973-1;O94973;B7Z5S9;O94973-2;O94973-3;B7Z1Q4;Q9UFK5;C9J1S3	0.39823		0.452108	0.724912	-0.380175	1.01159	1.36804	0.641773	1.6528	0.768344	2.01613	18	12	5	103.96	939	19.8	15	6	128.54	128.89	53.735	199.77	179.9	35.361	26.076	20.738	10.458	341.41	384.14	92.506	11232000	5903900	17225000	2807700	5766900	1050700	1032300	2912300	1137600
100 kDa DNA-pairing protein;DNA-binding p52/p100 complex, 100 kDa subunit;Polypyrimidine tract-binding protein-associated-splicing factor;Splicing factor, proline- and glutamine-rich;SFPQ protein;Splicing factor proline/glutamine-rich (Polypyrimidine tract binding protein associated)	IPI00010740;IPI00216613	IPI00010740;IPI00216613	PSF;SFPQ	P23246-1;P23246;Q6PIX2;Q86VG2;Q9BSV4;P23246-2	0.431852		0.120455	-0.113972	0.304327	0.171011	1.08708	0.157694	0.92404	1.23484	1.12585	48	33	34	76.149	707	43	38.3	33.9	148.43	125.97	68.591	160.26	129.86	55.531	111.37	105.88	73.475	163.16	108.02	65.177	123230000	867030000	259510000	114670000	443040000	454380000	160130000	1281600000	1062100000
100 kDa NT receptor;Glycoprotein 95;Neurotensin receptor 3;Sortilin;cDNA FLJ76489, highly similar to Homo sapiens sortilin 1 (SORT1), mRNA;cDNA FLJ50262, highly similar to Sortilin	IPI00217882	IPI00217882	SORT1	Q99523;A8KAQ3;B4DWI3	0.226617		-0.355857	-0.488167	-0.223546		0.781405	0.101489	0.71293	0.856458		2	3	0	92.067	831	2.6	3.7	0	78.482	81.713	49.566	8.1663	12.958	1.0272	22.418	22.517	7.9466				3096200	3441900	3095600	1922500	8875700	1875600	0	0	0
100 kDa U5 snRNP-specific protein;DEAD box protein 23;Probable ATP-dependent RNA helicase DDX23;PRP28 homolog;U5-100kD;cDNA FLJ77678, highly similar to Homo sapiens DEAD (Asp-Glu-Ala-Asp) box polypeptide 23, mRNA;cDNA FLJ54028, highly similar to Probable ATP-dependent RNA helicase DDX23 (EC 3.6.1.-);cDNA FLJ46571 fis, clone THYMU3041428, highly similar to Probable ATP-dependent RNA helicase DDX23…	IPI00006725;IPI00903057;IPI00794248	IPI00006725;IPI00903057	DDX23	Q9BUQ8;A8KA56;B4DH15;B3KY11	0.199277		-0.272308	-0.294721	-0.509848	-0.0123541	0.827994	0.145739	0.81523	0.702297	0.991473	13	6	5	95.581	820	13.9	7.2	6.2	112.99	101.7	41.998	97.839	83.683	44.033	59.556	36.727	44.946	127.06	113.71	34.874	6896500	20280000	9257300	5574000	21939000	12791000	3695700	3228900	10020000
107 kDa nucleoporin;Nuclear pore complex protein Nup107;Nucleoporin Nup107;cDNA FLJ11217 fis, clone PLACE1008044, highly similar to NUCLEAR PORE COMPLEX PROTEIN NUP107;cDNA FLJ58739, highly similar to Nuclear pore complex protein Nup107;NUP107 protein	IPI00028005;IPI00448974	IPI00028005;IPI00448974	NUP107	P57740;B3KMK0;B4DZ67;Q6PJE1	0.00125619	+	-0.874893	-0.818325	-0.881038	-0.925316	0.545294	0.0203892	0.5671	0.542977	0.526565	14	10	2	106.37	925	19.8	13.9	2.8	89.489	100.77	71.966	46.136	58.109	41.456	67.111	73.933	35.741	74.43	48.367	17.302	47458000	35841000	24720000	26849000	23641000	22515000	80640000	14376000	401830000
110 kDa cell membrane glycoprotein;Adhesion-regulating molecule 1;Proteasomal ubiquitin receptor ADRM1;Proteasome regulatory particle non-ATPase 13;Rpn13 homolog;Putative uncharacterized protein DKFZp686G2045;cDNA FLJ56666, highly similar to Adhesion-regulating molecule 1	IPI00033030;IPI00470921;IPI00911048	IPI00033030;IPI00470921;IPI00911048	ADRM1;GP110;DKFZp686G2045	Q16186;Q68E00;B4DMP7	0.125872		0.7444	0.160017	1.01453	1.05865	1.67528	0.540338	1.1173	2.02024	2.08299	5	4	4	42.153	407	15	10.3	11.1	137.65	119.39	77.534	67.496	72.103	54.583	82.881	90.682	54.388	279.11	157.48	61.436	2446300	14122000	16654000	6738200	34753000	25715000	18151000	97720000	42345000
115 kDa guanine nucleotide exchange factor;Rho guanine nucleotide exchange factor 1;Sub1.5;ARHGEF1 protein;Rho guanine nucleotide exchange factor (GEF) 1, isoform CRA_g	IPI00395605;IPI00647786;IPI00433169;IPI00339379;IPI00166711;IPI00643028	IPI00395605;IPI00647786;IPI00433169;IPI00339379	ARHGEF1;hCG_22327	Q92888-3;Q92888;Q92888-1;Q6NX52;Q92888-2	0.331979		0.541327	0.230326	0.852329		1.45531	0.447113	1.1731	1.80541		2	1	0	104.06	927	1.9	0.9	0	121.48	96.237	145.66	46.964	34.976	25.879							559560	1079200	1453700	45288	161370	787480	0	0	0
116 kDa U5 small nuclear ribonucleoprotein component;Elongation factor Tu GTP-binding domain-containing protein 2;SNU114 homolog;U5 snRNP-specific protein, 116 kDa;cDNA FLJ78483, highly similar to Homo sapiens elongation factor Tu GTP binding domain containing 2 (EFTUD2), mRNA;cDNA FLJ44500 fis, clone UTERU3000828, highly similar to 116 kDa U5 small nuclear ribonucleoprotein component;cDNA FLJ553…	IPI00003519;IPI00917777;IPI00903143	IPI00003519;IPI00917777;IPI00903143	EFTUD2;KIAA0031;SNRP116;U5-116KD	Q15029;A8KAP3;B3KX19;B4DMC0;Q6IBM8;B4DK30;B4DZB1;Q8IXJ3;B3KWY2	0.0208431	+	-0.477657	-0.406273	-0.617769	-0.408929	0.718143	0.0590082	0.75457	0.651678	0.753182	38	38	17	109.43	972	54.6	53.4	22.8	100.45	103.44	36.567	86.103	73.812	47.379	94.368	90.254	38.18	106.67	96.356	39.841	95350000	135290000	139180000	52353000	129540000	83270000	12059000	50263000	55582000
11B6;Breast cancer-associated gene 1 protein;Hepatocellular carcinoma-associated protein JCL-1;MAGE-D2 antigen;Melanoma-associated antigen D2;Putative uncharacterized protein MAGED2;Melanoma antigen family D, 2;cDNA FLJ58171, moderately similar to Melanoma-associated antigen D2;Melanoma antigen family D, 2, isoform CRA_d	IPI00009542;IPI00477809;IPI00337823;IPI00941467;IPI00910881;IPI00549529;IPI00910470;IPI00909974	IPI00009542;IPI00477809;IPI00337823;IPI00941467;IPI00910881;IPI00549529	BCG1;MAGED2;RP1-14O9.1-004;hCG_18665;RP1-14O9.1-005	Q9UNF1-1;Q9UNF1;C9JMB9;Q9UNF1-2;Q5H909;B4DX55;Q5H907	0.039806	+	1.37002	0.83649	1.79421	1.47935	2.58473	0.84641	1.7857	3.46825	2.78823	11	11	19	64.953	606	23.6	24.8	31.8	155.08	147.86	145.92	92.285	56.108	19.28	89.624	96.755	27.472	127.39	135.33	36.78	10136000	83099000	39495000	10473000	55333000	60576000	18875000	23670000	24463000
11S regulator complex subunit alpha;Activator of multicatalytic protease subunit 1;Interferon gamma up-regulated I-5111 protein;Proteasome activator 28 subunit alpha;Proteasome activator complex subunit 1;PSME1 protein;cDNA, FLJ92500, Homo sapiens proteasome (prosome, macropain) activator subunit 1 (PA28 alpha) (PSME1), mRNA;Proteasome (Prosome, macropain) activator subunit 1 (PA28 alpha), isofor…	IPI00479722;REV__IPI00642706	IPI00479722	IFI5111;PSME1;hCG_40175	Q06323;Q6FHU3;Q6IBM2	0.490987		0.759447		0.021204	1.49769	1.69284	1.27922		1.01481	2.8239	0	1	7	28.723	249	0	2.8	39	119.27	123.11	79.001							188.05	181.13	71.165	0	0	0	194640	2578900	2530800	3055800	8818200	62488000
11S regulator complex subunit gamma;Activator of multicatalytic protease subunit 3;Ki nuclear autoantigen;Proteasome activator 28 subunit gamma;Proteasome activator complex subunit 3;cDNA FLJ32659 fis, clone TESTI1000045, highly similar to Proteasome activator complex subunit 3;PSME3 protein	IPI00219445;IPI00030243;IPI00795743;IPI00922362	IPI00219445;IPI00030243	PSME3	P61289-2;P61289;P61289-1;B3KQ25;Q6FHK7	0.232818		-0.608682	-0.536545	-1.2649	-0.0246034	0.655796	0.283542	0.68942	0.416129	0.983091	7	6	3	30.886	267	27.3	29.2	13.9	119.36	113.83	46.607	156.93	140.89	55.56	58.845	80.226	16.245	216.76	142	28.219	948990	6214100	3995300	12222000	36065000	16909000	4647600	9608700	8858600
130 kDa cis-Golgi matrix protein;GM130 autoantigen;Golgin subfamily A member 2;Golgin-95;Putative uncharacterized protein DKFZp686K0319;Golgi matrix protein GM130	IPI00413895;IPI00943357;IPI00921934;IPI00921970;IPI00156651;IPI00739112;IPI00935647	IPI00413895;IPI00943357	GOLGA2;DKFZp686K0319	Q08379-2;Q08379;Q08379-1;Q5HYE0;Q5PXD5	0.37384		-0.819159	-0.273971	-1.36435		0.566772	0.310159	0.82704	0.38841		18	6	0	113.08	1002	22.8	6.9	0	118.79	110.64	72.45	107.84	89.592	52.795	132.55	146.72	24.386				20911000	25468000	33657000	5411100	11139000	4619700	0	0	0
130 kDa leucine-rich protein;GP130;Leucine-rich PPR motif-containing protein, mitochondrial;cDNA FLJ60080, highly similar to 130 kDa leucine-rich protein (LRP 130)	IPI00783271;IPI00917568;IPI00917844;IPI00917676;IPI00917975;IPI00328431;IPI00383609;REV__IPI00218317	IPI00783271	LRP130;LRPPRC	P42704;B4DSR0	0.0589168		-0.992368	-1.00961	-0.547252	-1.42024	0.502652	0.156452	0.49668	0.684322	0.37365	76	57	23	157.9	1394	54.2	40	19.5	140.38	130.22	133.66	113.19	95.646	60.063	89.259	95.589	38.57	157.9	156.85	39.195	260320000	639350000	273870000	106720000	511900000	551490000	3402400000	1163600000	1145600000
133 kDa FK506-binding protein;FK506-binding protein 15;WASP and FKBP-like;cDNA FLJ57617;cDNA FLJ57682	IPI00853400;IPI00855962;IPI00646791;REV__IPI00894315;REV__IPI00894449	IPI00853400;IPI00855962	FKBP15;KIAA0674	Q5T1M5-1;Q5T1M5;B4DVS2;B4DZS8;Q5T1M5-2	0.10284		1.17829	0.657091	0.890198	1.98759	2.26309	1.3067	1.5769	1.85343	3.96574	3	1	2	133.63	1219	2.9	0.5	1.7	167.5	90.239	108.95	52.496	98.236	44.624				28.952	97.76	3.3222	156330	436920	352470	70136	358980	718030	1260500	1260000	1549400
133 kDa nucleoporin;Nuclear pore complex protein Nup133;Nucleoporin Nup133;cDNA FLJ55441, highly similar to Nuclear pore complex protein Nup133;cDNA FLJ55448, highly similar to Nuclear pore complex protein Nup133;Putative uncharacterized protein NUP133;Nucleoporin 133kDa	IPI00291200;IPI00514905;IPI00641510	IPI00291200;IPI00514905	NUP133;RP5-1068B5.4-002	Q8WUM0;B4E206;B4E3T7;A6NGS4;Q5T8N1	0.00486455	+	-0.784842	-0.760578	-0.704164	-0.889785	0.580415	0.0378644	0.59026	0.613798	0.539695	18	5	2	128.98	1156	17.7	6.9	3	104.36	113.84	74.04	97.503	60.101	90.571	75.065	61.577	40.465	40.923	33.228	1.8304	18623000	38213000	47225000	1643500	5496100	12113000	67802000	44710000	193860000
136 kDa double-stranded RNA-binding protein;Double-stranded RNA-specific adenosine deaminase;Interferon-inducible protein 4;K88DSRBP;Adenosine deaminase, RNA-specific isoform ADAR-a variant	IPI00760588;IPI00514285;IPI00513767;IPI00013179	IPI00760588	ADAR;ADAR1;DSRAD;G1P1;IFI4	P55265-5;P55265;B1AQQ9;Q59EC0	0.00960842	+	-0.842532	-0.682256	-0.884012	-0.961327	0.557664	0.0569029	0.62319	0.541859	0.513584	36	19	9	103.64	931	44.9	26.2	14.3	155.37	121.38	113.98	148.97	118.96	57.518	115.12	87.954	114.04	256.59	152.26	124.52	158780000	111240000	100210000	158430000	127100000	53844000	23968000	46159000	61437000
13S Golgi transport complex 90 kDa subunit;Component of oligomeric Golgi complex 5;Conserved oligomeric Golgi complex subunit 5;Golgi transport complex 1;cDNA FLJ12773 fis, clone NT2RP2001660, highly similar to Conserved oligomeric Golgi complex component 5;Component of oligomeric golgi complex 5, isoform CRA_c;Putative uncharacterized protein COG5	IPI00377050;IPI00007347;IPI00952818;IPI00885051;IPI00946180	IPI00377050;IPI00007347;IPI00952818;IPI00885051	COG5;GOLTC1;GTC90;hCG_1811707	Q9UP83-2;Q9UP83;B3KMW0;Q9UP83-1;A8MUI4;Q9UP83-3	0.278115		-0.227056	-0.121031	-0.33308		0.854377	0.0888764	0.91953	0.79384		1	4	0	94.876	860	1.9	5.9	0	94.436	97.367	67.823				32.548	23.739	11.239				1095000	739680	662550	2902800	3759600	7382300	0	0	0
140 kDa nuclear and cell adhesion-related phosphoprotein;Desmosome-associated protein;Domain-rich serine protein;Melanoma metastasis clone A protein;Nuclear protein SDK3;Pinin;SR-like protein;cDNA FLJ75071, highly similar to Homo sapiens pinin, desmosome associated protein (PNN), mRNA;cDNA FLJ56361, highly similar to Pinin;cDNA FLJ52602, highly similar to Pinin;Neutrophil protein	IPI00789041;IPI00002649	IPI00789041;IPI00002649	DRS;MEMA;PNN	Q9H307-1;Q9H307;A8K964;B4DTD4;B4E392;Q15789;Q9H307-2	0.285971		-0.54346	-0.714373	-1.09363	0.177621	0.686123	0.34897	0.60947	0.468582	1.13102	13	4	3	81.613	717	19	6.6	4.7	106.15	92.181	75.784	115.71	102.25	56.759	88.118	99.734	101.25	51.502	29.185	15.04	37640000	23558000	23768000	17244000	16326000	3499400	15109000	6175600	47439000
140 kDa nucleolar phosphoprotein;Hepatitis C virus NS5A-transactivated protein 13;Nucleolar 130 kDa protein;Nucleolar and coiled-body phosphoprotein 1;Nucleolar phosphoprotein p130;cDNA, FLJ95131, highly similar to Homo sapiens nucleolar and coiled-body phosphoprotein 1 (NOLC1), mRNA;cDNA FLJ32193 fis, clone PLACE6002345, highly similar to Nucleolar phosphoprotein p130;NOLC1 protein;Nucleolar and…	IPI00216654;IPI00292387	IPI00216654;IPI00292387	KIAA0035;NOLC1;NS5ATP13;hCG_25636	Q14978-2;Q14978;B2RAU8;Q14978-1;Q96J17	0.153471		-0.931562	-1.56444	-1.07813	-0.152119	0.52429	0.29318	0.33811	0.473642	0.899928	22	8	9	74.746	709	28.8	13.3	12.8	177.05	164.31	163.84	153.19	134.48	114.77	159.96	80.079	173.46	281.39	175.08	167.75	17129000	46531000	25230000	2831300	7201600	3575100	2728200	5106300	8899600
140 kDa Ser/Arg-rich domain protein;U2-associated protein SR140;Putative uncharacterized protein ENSP00000417441	IPI00143753;IPI00829908;IPI00790699;IPI00791877;IPI00788772;IPI00945586;IPI00945497;IPI00945148;IPI00944988;IPI00945524	IPI00143753;IPI00829908;IPI00790699;IPI00791877;IPI00788772	KIAA0332;SR140	O15042-1;O15042;O15042-2;O15042-3;C9JB80	0.296114		-0.366494	-0.550423		-0.182565	0.775665	0.14023	0.68282		0.881135	9	0	3	118.29	1029	10.3	0	4.3	117.52	97.801	54.888	90.824	50.112	45.011				86.095	63.082	63.045	7147600	7782600	5330600	0	0	0	16952000	19676000	65842000
14-3-3 protein beta/alpha;14-3-3 protein beta/alpha, N-terminally processed;Protein 1054;Protein kinase C inhibitor protein 1	IPI00759832	IPI00759832	YWHAB	P31946-2;P31946	0.621913		0.468596		-0.225398	1.16259	1.38376	0.978091		0.855359	2.23859	2	18	19	27.85	244	6.1	64.3	56.6	156.15	135.58	114.71				13.242	8.4694	5.2888	187.09	178.98	56.665	0	0	0	818240	9628000	9839900	5777100	70388000	26682000
14-3-3 protein beta/alpha;14-3-3 protein beta/alpha, N-terminally processed;Protein 1054;Protein kinase C inhibitor protein 1;Tyrosine 3-monooxygenase/tryptophan 5-monooxygenase activation protein, beta polypeptide;Tyrosine 3-monooxygenase/tryptophan 5-monooxygenase activation protein, beta polypeptide variant	IPI00216318;IPI00640721;IPI00645801	IPI00216318;IPI00640721;IPI00645801	YWHAB;RP1-148E22.1-004;RP1-148E22.1-003	P31946-1;P31946;B5BU24;Q4VY19;Q59EQ2;Q4VY20	0.500554		0.579499		-0.00100953	1.16001	1.49433	0.873479		0.9993	2.23459	2	18	21	28.082	246	6.1	64.2	56.9	138.84	123.59	97.043				55.895	52.196	16.218	213.9	118.92	32.413	0	0	0	19973000	85265000	64915000	6258400	189800000	47842000
14-3-3 protein epsilon;cDNA, FLJ79100, highly similar to 14-3-3 protein epsilon (14-3-3E);14-3-3 protein epsilon isoform transcript variant 1;cDNA FLJ51851, highly similar to 14-3-3 protein epsilon (14-3-3E);cDNA, FLJ79084, highly similar to 14-3-3 protein epsilon (14-3-3E);cDNA FLJ60092, highly similar to 14-3-3 protein epsilon (14-3-3E);Putative uncharacterized protein YWHAE;cDNA FLJ51975, mode…	IPI00000816;IPI00793344;IPI00792761;IPI00795516;IPI00940628;IPI00086909;IPI00903243	IPI00000816;IPI00793344;IPI00792761;IPI00795516;IPI00940628	YWHAE	P62258;B7ZA86;Q4VJB6;B4DJB0;C9JAV0;B4DJF2	0.0978586		1.17108	1.83859	0.468112	1.20653	2.2518	1.10115	3.5766	1.3833	2.30782	17	19	17	29.174	255	54.5	67.5	67.8	154.95	145.39	126.9	151.32	97.094	52.965	83.498	103.88	40.688	221.14	145.7	41.851	42464000	353060000	156070000	296890000	1130700000	894920000	43800000	787440000	279630000
14-3-3 protein eta;Protein AS1;cDNA, FLJ93036, highly similar to Homo sapiens tyrosine 3-monooxygenase/tryptophan 5-monooxygenaseactivation protein, eta polypeptide (YWHAH), mRNA;Tyrosine 3-monooxygenase/tryptophan 5-monooxygenase activation protein, eta polypeptide;Homo sapiens clone CDABP0046 mRNA sequence	IPI00216319;IPI00794254;IPI00827595;IPI00879350	IPI00216319;IPI00794254	YWHA1;YWHAH;LL22NC03-44A4.1-004	Q04917;B2R6N6;A2IDB2;Q9H4N8	0.594451		0.540734	2.24638	-0.52697	-0.0972062	1.45471	2.27245	4.7449	0.694011	0.934842	4	17	16	28.218	246	13.4	56.1	47.6	124.84	110.04	74.632	58.01	71.536	27.56	64.622	76.391	52.48	212.88	123.66	49.05	244770	2723100	1062000	20087000	103520000	114610000	103310000	134880000	292490000
14-3-3 protein gamma;14-3-3 protein gamma, N-terminally processed;Protein kinase C inhibitor protein 1;cDNA FLJ14168 fis, clone NT2RP2001440, highly similar to 14-3-3 protein gamma;cDNA FLJ51843, highly similar to 14-3-3 protein gamma;cDNA FLJ52141, highly similar to 14-3-3 protein gamma	IPI00220642;IPI00910779	IPI00220642;IPI00910779	YWHAG	P61981;B3KNB4;B4DHC4;B4DE78	0.149681		1.2007	2.17632	0.374561	1.05122	2.29851	1.68249	4.52	1.29645	2.07228	3	21	29	28.302	247	9.7	79.4	81.4	143.1	126.58	106.25	76.901	20.537	51.765	64.035	84.664	44.632	230.35	159.46	56.825	1253800	3970800	3071000	179550000	1274500000	559780000	170440000	2104200000	508770000
14-3-3 protein tau;14-3-3 protein T-cell;14-3-3 protein theta;Protein HS1;cDNA FLJ52118, highly similar to 14-3-3 protein theta;cDNA FLJ51144, highly similar to 14-3-3 protein theta;cDNA, FLJ79057, highly similar to 14-3-3 protein theta;Putative uncharacterized protein YWHAQ	IPI00018146;IPI00796727;IPI00651755	IPI00018146;IPI00796727	YWHAQ	P27348;B4DMT8;B4DY04;Q53S41;Q53RR5	0.0874959		1.36908	2.16169	0.666416	1.27914	2.58307	1.48513	4.4744	1.58713	2.42695	4	17	23	27.764	245	10.6	57.1	58.8	165.05	133.24	127.46	39.934	87.741	53.103	47.507	67.936	39.244	242.93	147.65	56.124	1183700	2923900	2904200	87366000	398610000	236460000	124890000	841550000	336490000
14-3-3 protein zeta/delta;Protein kinase C inhibitor protein 1;Tyrosine 3-monooxygenase/tryptophan 5-monooxygenase activation protein zeta polypeptide;14-3-3 protein/cytosolic phospholipase A2 protein	IPI00021263;IPI00793388;IPI00790689;IPI00789337	IPI00021263;IPI00793388;IPI00790689	YWHAZ	P63104;D0PNI1;Q6LD62	0.153278		1.92915	3.54003	0.615906	1.63151	3.8083	5.4356	11.632	1.53252	3.09837	4	25	26	27.745	245	10.6	81.6	75.9	152.88	131.87	133.4	163.95	105.17	37.757	55.127	88.502	46.849	222.11	138.89	40.409	465040	2497300	1882400	34136000	382930000	301410000	58623000	1053900000	197930000
150 kDa oxygen-regulated protein;170 kDa glucose-regulated protein;Hypoxia up-regulated protein 1;cDNA, FLJ94899, Homo sapiens hypoxia up-regulated 1 (HYOU1), mRNA;Oxigen-regulated protein 150;cDNA FLJ45395 fis, clone BRHIP3027191, highly similar to 150 kDa oxygen-regulated protein (Orp150);cDNA FLJ59408, highly similar to 150 kDa oxygen-regulated protein (Orp150);cDNA FLJ54564, highly similar to…	IPI00000877;IPI00922838;IPI00922127;IPI00922745;IPI00010369	IPI00000877;IPI00922838;IPI00922127	GRP170;HYOU1;ORP150;DKFZp686N08236	Q9Y4L1;A8C1Z0;B3KXH0;B7Z602;B7Z766;Q05D91;Q68D25;Q6IN67;Q9BST8;B7Z2N4;B7Z909	0.0832997		0.157794	0.0994972	0.11951	0.254375	1.11558	0.0662053	1.0714	1.08637	1.19282	45	38	18	111.33	999	44.8	39	20.6	114.12	117.78	55.688	121.86	114.42	42.295	68.91	99.876	60.385	116.02	120.18	35.003	39798000	87783000	111400000	53079000	269160000	270920000	206430000	1319600000	810420000
155 kDa nucleoporin;Nuclear pore complex protein Nup155;Nucleoporin Nup155;cDNA FLJ56637, highly similar to Nuclear pore complex protein Nup155;cDNA FLJ11241 fis, clone PLACE1008603, highly similar to Nuclear pore complex protein Nup155	IPI00026625;IPI00376609;REV__IPI00414249;REV__IPI00216728;REV__IPI00854729;REV__IPI00034558;REV__IPI00853624;REV__IPI00419705;REV__IPI00915413	IPI00026625;IPI00376609	KIAA0791;NUP155	O75694-1;O75694;B4DLT2;O75694-2;B3KMK3	0.0173087	+	-1.05872	-0.816698	-1.05395	-1.3055	0.480059	0.0816216	0.56774	0.481649	0.40458	16	14	2	155.2	1391	14.7	13.2	2.1	109.54	116.64	94.652	117.44	127.9	65.55	90.494	82.801	85.303	26.979	20.869	7.9675	143180000	40498000	41641000	34563000	47470000	21482000	34669000	192760000	99585000
15-hydroxyprostaglandin dehydrogenase [NADP+];Carbonyl reductase [NADPH] 1;NADPH-dependent carbonyl reductase 1;Prostaglandin 9-ketoreductase;Prostaglandin-E(2) 9-reductase	IPI00295386;IPI00795334;IPI00909888	IPI00295386	CBR;CBR1;CRN	P16152	0.954067		-0.0562255	-0.988333	-0.851599	1.67126	0.961777	1.53353	0.50406	0.55417	3.18492	8	7	7	30.375	277	38.6	26.4	23.1	107.6	90.273	64.907	47.049	78.09	41.17	11.121	45.713	13.075	192.26	141.07	106.44	2038100	5455800	3025600	6007500	21052000	17037000	10756000	26691000	16781000
15-oxoprostaglandin 13-reductase;NADP-dependent leukotriene B4 12-hydroxydehydrogenase;Prostaglandin reductase 1;cDNA FLJ59730, highly similar to NADP-dependent leukotriene B412-hydroxydehydrogenase (EC 1.3.1.74);Leukotriene B4 12-hydroxydehydrogenase, isoform CRA_d	IPI00292657;IPI00642248;IPI00164901;IPI00643630	IPI00292657;IPI00642248	LTB4DH;PTGR1;hCG_28760;RP11-16L21.1-004	Q14914;B4DPK3;Q5JVP3	0.0132517	+	2.43753	2.28336	2.04222	2.98702	5.41714	2.01821	4.8681	4.11879	7.92833	5	6	11	35.869	329	19.1	23.4	31.6	108.7	138.47	179.01	41.404	72.183	43.007	79.559	80.183	44.911	156.99	187.19	98.185	2136200	4769300	40106000	7058300	12755000	35871000	4689100	38362000	20847000
15S Mg(2+)-ATPase p97 subunit;Transitional endoplasmic reticulum ATPase;Valosin-containing protein;VCP protein;Putative uncharacterized protein DKFZp434K0126	IPI00022774;IPI00915799;IPI00916175;IPI00218757;IPI00165042;IPI00411394;IPI00218758;IPI00171135;IPI00216738;IPI00549699;IPI00645111;IPI00902871;IPI00550004	IPI00022774	VCP;DKFZp434K0126	P55072;Q0IIN5;Q96IF9;Q9HAP0;Q9HAP1;Q9NTC4	0.0956268		0.718855	0.827494	0.259893	1.06918	1.64588	0.456334	1.7746	1.19739	2.09824	67	71	74	89.321	806	64	72	79	140.34	128.22	83.165	119.63	91.743	36.513	101.95	109.58	38.175	149.38	137.54	34.345	190180000	945990000	688300000	179990000	934210000	1068400000	156210000	2001500000	643170000
160 kDa neurofilament protein;Neurofilament 3;Neurofilament medium polypeptide;Neurofilament triplet M protein;cDNA FLJ58361, highly similar to Neurofilament triplet M protein	IPI00217507;IPI00868727	IPI00217507	NEF3;NEFM;NFM	P07197;B4DGN2	0.468452		2.11699	6.67751	-1.37635	1.04982	4.33789	58.3948	102.36	0.385193	2.07026	16	3	4	102.47	916	20.5	2.2	6.2	194.03	198.14	305.63	115.01	162.97	92.333	85.065	48.196	35.987	29.17	174.9	139.71	5928100	7831200	10880000	1767300	827940	461960	123200000	5413400	14536000
160 kDa nucleoporin;Nuclear pore complex protein Nup160;Nucleoporin Nup160	IPI00748807;IPI00909318;IPI00953414;IPI00221235	IPI00748807	KIAA0197;NUP120;NUP160	Q12769-1;Q12769	0.235864		-0.871587	-0.533034	-1.21014		0.546545	0.183051	0.6911	0.432227		10	5	1	162.12	1436	7.5	3.2	1	88.099	102.32	72.086	75.849	56.288	52.954	136.97	122.84	17.572				3844800	6122800	4618700	8597900	4530100	1804400	0	0	131650
17-beta-hydroxysteroid dehydrogenase 10;3-hydroxy-2-methylbutyryl-CoA dehydrogenase;3-hydroxyacyl-CoA dehydrogenase type II;3-hydroxyacyl-CoA dehydrogenase type-2;Endoplasmic reticulum-associated amyloid beta-peptide-binding protein;Mitochondrial ribonuclease P protein 2;Short-chain type dehydrogenase/reductase XH98G2;Type II HADH;HADH2 protein;Hydroxyacyl-Coenzyme A dehydrogenase, type II, isofo…	IPI00017726;IPI00336094;IPI00639797	IPI00017726;IPI00336094;IPI00639797	ERAB;HADH2;HSD17B10;MRPP2;SCHAD;XH98G2;hCG_19788;RP3-339A18.2-001;RP3-339A18.2-004	Q99714-1;Q99714;Q6IBS9;Q99714-2;Q5H928	0.374386		0.284279		0.0947261	0.473831	1.2178	0.226932		1.06786	1.38879	0	14	9	26.923	261	0	68.6	57.1	103.98	104.34	34.1				60.713	73.687	17.891	154.94	159.73	80.917	0	0	0	89300000	322990000	251410000	5461000	23391000	31989000
17-beta-hydroxysteroid dehydrogenase 12;3-ketoacyl-CoA reductase;Estradiol 17-beta-dehydrogenase 12;cDNA FLJ90530 fis, clone NT2RP4002187, highly similar to Homo sapiens hydroxysteroid (17-beta) dehydrogenase 12 (HSD17B12), mRNA;cDNA FLJ61181, highly similar to Homo sapiens hydroxysteroid (17-beta) dehydrogenase 12 (HSD17B12), mRNA	IPI00007676;IPI00788741	IPI00007676	HSD17B12	Q53GQ0;B3KQJ0;B4DWS6	0.0462827	+	-0.484057	-0.576627	-0.606632	-0.268913	0.714964	0.0962699	0.67053	0.656728	0.829944	2	5	2	34.324	312	6.7	15.7	8.7	90.373	99.181	36.203	19.584	75.938	55.266	16.666	50.738	22.566	179.22	123.72	85.807	202820	1378600	339010	3705700	23140000	28348000	951170	965410	4462500
17-beta-hydroxysteroid dehydrogenase 4;3-alpha,7-alpha,12-alpha-trihydroxy-5-beta-cholest-24-enoyl-CoA hydratase;3-hydroxyacyl-CoA dehydrogenase;D-bifunctional protein;Peroxisomal multifunctional enzyme type 2;cDNA, FLJ92803, highly similar to Homo sapiens hydroxysteroid (17-beta) dehydrogenase 4 (HSD17B4), mRNA;cDNA FLJ36730 fis, clone UTERU2012610, highly similar to Peroxisomal multifunctional …	IPI00019912;IPI00909582;IPI00847995	IPI00019912;IPI00909582;IPI00847995	EDH17B4;HSD17B4	P51659;B2R659;B3KSP2;B4DDM5;B4DVS5;B4DNV1;B4DSD0;B4DI68;Q59H27;Q9UBA4	0.0218797	+	-1.32606	-1.15637	-1.09828	-1.72351	0.398857	0.0899888	0.44864	0.467071	0.30281	43	38	20	79.685	736	61.7	60.5	33	128.07	133.39	103.36	109.02	108.21	68.957	89.042	115.85	77.762	190.51	164.35	42.044	159660000	307360000	238120000	198790000	707940000	739530000	19199000	61203000	33063000
18 kDa phosphoprotein;Cofilin, non-muscle isoform;Cofilin-1;cDNA FLJ51435, moderately similar to Cofilin-1	IPI00012011;IPI00909841;IPI00893115	IPI00012011;IPI00909841	CFL;CFL1	P23528;B4E112	0.194136		2.05234		2.69834	1.40633	4.14777	2.71524		6.49056	2.65062	0	3	8	18.502	166	0	22.3	45.2	127.77	123.8	141.72				40.614	43.224	37.078	140.51	115.98	41.449	0	0	0	14208000	18082000	24496000	36011000	100570000	102270000
182 kDa tankyrase-1-binding protein;cDNA FLJ45975 fis, clone PLACE7018479, highly similar to 182 kDa tankyrase 1-binding protein	IPI00304589;IPI00847646;IPI00384104	IPI00304589;IPI00847646	KIAA1741;TAB182;TNKS1BP1	Q9C0C2-1;Q9C0C2;B3KXS7;Q9C0C2-2	0.641054		0.270107	0.149389	-0.523361	1.18429	1.2059	0.817579	1.1091	0.695749	2.27252	22	7	4	181.78	1729	17.5	6.1	3.2	114.8	116.29	75.849	113.27	134.67	43.773	68.797	64.256	48.274	71.09	76.231	73.586	16955000	21344000	24344000	3914800	9115300	8591400	5739400	18916000	51922000
190 kDa paraneoplastic pemphigus antigen;195 kDa cornified envelope precursor protein;Periplakin	IPI00298057	IPI00298057	KIAA0568;PPL	O60437	0.885771		0.145305	1.2416	-1.62518	0.819496	1.10596	1.04869	2.3646	0.32417	1.76479	5	2	2	204.68	1756	3.6	2.2	1.1	130.17	121.87	115.74	43.848	55.666	43.686	84.852	96.568	7.1743	48.963	56.885	136.34	626750	1410400	4664100	1012400	2151900	942640	3181600	2661100	3543000
1-acylglycerol-3-phosphate O-acyltransferase 5;1-acyl-sn-glycerol-3-phosphate acyltransferase epsilon;Lysophosphatidic acid acyltransferase epsilon;AGPAT5 protein	IPI00028491	IPI00028491	AGPAT5	Q9NUQ2;Q6NUM7	0.0971119		-0.918794	-0.777541	-1.06005		0.528951	0.073358	0.58336	0.479616		2	1	0	42.072	364	5.2	5.2	0	213.2	170.66	94.271										514650	599940	399180	360310	472770	196070	0	0	0
1-acylglycerol-3-phosphate O-acyltransferase 7;Acyltransferase-like 3;Lysophosphatidylcholine acyltransferase 4;Lysophosphatidylethanolamine acyltransferase 2;Lysophospholipid acyltransferase LPCAT4;LPCAT4 protein	IPI00385128;IPI00783192	IPI00385128;IPI00783192	AGPAT7;AYTL3;LPCAT4;LPEAT2	Q643R3-1;Q643R3;B7ZM32;Q643R3-2	0.356496		-0.1225	-0.267479	-0.176833	0.0768128	0.918594	0.116873	0.83077	0.884643	1.05469	3	1	1	57.218	524	8.4	3.6	3.1	118.76	131.33	55.174	118.59	130.08	26.209							1424800	2210800	3889800	83771	980900	148260	251160	369330	1622200
1-acylglycerophosphatidylinositol O-acyltransferase;Bladder and breast carcinoma-overexpressed gene 1 protein;Leukocyte receptor cluster member 4;Lysophosphatidylinositol acyltransferase;Lysophospholipid acyltransferase 7;Membrane-bound O-acyltransferase domain-containing protein 7;cDNA FLJ55184, highly similar to Homo sapiens leukocyte receptor cluster (LRC) member 4 (LENG4), mRNA;Putative uncha…	IPI00657706;IPI00885058;IPI00019068;IPI00645667;IPI00170436;IPI00893265;IPI00880150;IPI00925158	IPI00657706;IPI00885058;IPI00019068;IPI00645667	BB1;LENG4;MBOAT7;OACT7	Q96N66-1;Q96N66;B4DDH8;Q96N66-2;B5MEE6;Q96N66-3	0.882373		-0.0598834	-0.595729	-0.201885	0.617964	0.959342	0.456048	0.66171	0.869414	1.53471	4	3	1	52.764	472	9.5	9.5	3.6	56.12	71.49	71.293	73.876	68.881	39.605	53.317	44.473	17.552				8482700	4303200	3454700	1566200	5191900	2889600	599720	1262900	6842100
1-acylglycerophosphocholine O-acyltransferase;1-alkylglycerophosphocholine O-acetyltransferase;Acetyl-CoA:lyso-platelet-activating factor acetyltransferase;Acyltransferase-like 2;Lysophosphatidylcholine acyltransferase 1;Phosphonoformate immuno-associated protein 3	IPI00171626	IPI00171626	AYTL2;LPCAT1;PFAAP3	Q8NF37	0.00379998	+	-2.50015	-2.2097	-2.55375	-2.73699	0.176759	0.0339038	0.21618	0.170311	0.149997	10	6	1	59.151	534	23.4	15.9	2.8	175.16	171.59	146.75	148.4	188.38	65.755	90.376	135.25	112.44	141.89	93.083	22.22	6601300	26433000	7281400	151160000	38175000	19097000	4112400	4534500	2051000
1-Cys peroxiredoxin;24 kDa protein;Acidic calcium-independent phospholipase A2;Antioxidant protein 2;Liver 2D page spot 40;Non-selenium glutathione peroxidase;Peroxiredoxin-6;Red blood cells page spot 12;Peroxiredoxin 6	IPI00220301;IPI00910553	IPI00220301	AOP2;KIAA0106;PRDX6	P30041;A4UCS6	0.351202		1.15273		0.44334	1.86213	2.22335	1.60916		1.35975	3.63544	0	11	16	25.035	224	0	44.6	63.8	140.5	114.73	143.4				36.849	59.701	38.911	200.92	145.52	38.655	0	0	0	26549000	192870000	108970000	80489000	339340000	206270000
1-phosphatidylinositol-4,5-bisphosphate phosphodiesterase beta-3;Phosphoinositide phospholipase C-beta-3;Phospholipase C-beta-3;Similar to phospholipase C, beta 3 (Phosphatidylinositol-specific)	IPI00010400;IPI00181283	IPI00010400;IPI00181283	PLCB3	Q01970;Q8N1A4	0.00856333	+	-2.45747	-2.23882	-2.2185	-2.91508	0.182066	0.0466646	0.21186	0.214864	0.132579	18	6	1	138.8	1234	16.4	6.7	1.1	115.8	113.37	146.55	98.806	124.79	119.09	124.26	106.54	29.82	19.953	17.635	33.607	9063200	12391000	11160000	4244500	3232900	2522700	693680	768220	1132200
1-phosphatidylinositol-4,5-bisphosphate phosphodiesterase delta-1;Phosphoinositide phospholipase C-delta-1;Phospholipase C-delta-1;Phospholipase C-III;cDNA FLJ45915 fis, clone PLACE5000492, highly similar to 1-phosphatidylinositol-4,5-bisphosphate phosphodiesterase delta 1 (EC 3.1.4.11);cDNA FLJ75064, highly similar to Homo sapiens phospholipase C, delta 1 (PLCD1), mRNA;cDNA FLJ33455 fis, clone B…	IPI00746030;IPI00016461;IPI00925355;IPI00927527;IPI00926853;IPI00925632;IPI00926688	IPI00746030;IPI00016461;IPI00925355	PLCD1;DKFZp686K101	P51178;B3KXR5;A8K8F9;B3KR14;Q59EE9;Q5HYD7;C9JX94	0.636267		1.11697		-0.620493	2.85444	2.16892	4.65402		0.650449	7.23223	0	2	1	85.664	756	0	2.5	1.5	65.953	86.127	86.496				67.919	42.16	6.9325				0	0	0	601000	2588400	611610	17714000	3562700	1989700
1-phosphatidylinositol-4,5-bisphosphate phosphodiesterase eta-1;Phosphoinositide phospholipase C-eta-1;Phospholipase C-eta-1;Phospholipase C-like protein 3;Putative uncharacterized protein PLCH1	IPI00175416;IPI00783616;IPI00889624;IPI00848061;IPI00939668;IPI00947101;IPI00026386	IPI00175416;IPI00783616;IPI00889624;IPI00848061;IPI00939668;IPI00947101;IPI00026386	KIAA1069;PLCH1;PLCL3	Q4KWH8-1;Q4KWH8;Q4KWH8-2;Q4KWH8-4;Q4KWH8-3;C9J228	0.705985		0.0965929	-0.0974706	0.290656		1.06925	0.204019	0.93467	1.2232		1	2	0	189.22	1693	0.5	1	0	25.31	20.08	26.528										149770	2493600	305270	176090	1178900	1416300	0	0	0
1-phosphatidylinositol-5-phosphate 4-kinase 2-alpha;Diphosphoinositide kinase 2-alpha;Phosphatidylinositol-5-phosphate 4-kinase type II alpha;Phosphatidylinositol-5-phosphate 4-kinase type-2 alpha;PIP5KIII;PtdIns(4)P-5-kinase B isoform;PtdIns(4)P-5-kinase C isoform;PtdIns(5)P-4-kinase isoform 2-alpha;cDNA FLJ53867, highly similar to Phosphatidylinositol-4-phosphate 5-kinase type-2 alpha (EC 2.7.1…	IPI00009688;IPI00908895;IPI00553149	IPI00009688	PIP4K2A;PIP5K2;PIP5K2A	P48426;B0YJ66;B4DGX2	0.251705		0.644386	1.4225	0.067198	0.443458	1.56307	0.866761	2.6805	1.04768	1.35986	3	4	1	46.224	406	7.4	10.8	4.4	63.539	76.935	79.723	16.613	48.525	62.251	66.372	41.252	40.205				1426900	8645000	4652800	1562600	9158600	3109200	109130	383390	536750
1-phosphatidylinositol-5-phosphate 4-kinase 2-beta;Diphosphoinositide kinase 2-beta;Phosphatidylinositol-5-phosphate 4-kinase type II beta;Phosphatidylinositol-5-phosphate 4-kinase type-2 beta;PtdIns(5)P-4-kinase isoform 2-beta;Putative uncharacterized protein PIP4K2B	IPI00216470;IPI00235352;IPI00952795	IPI00216470;IPI00235352;IPI00952795	PIP4K2B;PIP5K2B	P78356-1;P78356;P78356-2;C9JMM2	0.120325		2.12437	1.718		2.53074	4.36012	1.7599	3.2898		5.77868	2	1	2	47.377	416	5.5	2.2	7.7	136.1	161.16	135.5										227920	908040	3676500	0	0	0	199140	1459900	448710
2,3-cyclic-nucleotide 3-phosphodiesterase;cDNA FLJ59866, highly similar to 2,3-cyclic-nucleotide 3-phosphodiesterase (EC 3.1.4.37);cDNA FLJ52954, highly similar to 2,3-cyclic-nucleotide 3-phosphodiesterase(EC 3.1.4.37)	IPI00306667;IPI00220993;IPI00795036	IPI00306667;IPI00220993	CNP	P09543-1;P09543;P09543-2;B4DFN6;B4DI06	0.244647		0.46708	0.27453	0.0959129	1.0308	1.38231	0.526644	1.2096	1.06874	2.04315	14	11	6	47.578	421	44.4	35.2	21.6	120.27	123.98	39.137	129.64	98.116	34.818	105.74	111.15	30.7	92.398	111.5	30.399	9498800	43484000	28736000	12235000	107930000	42198000	2031800	10734000	10526000
2,3-diketo-5-methylthio-1-phosphopentane phosphatase;Enolase-phosphatase E1;MASA homolog;MasA	IPI00038378;IPI00795241;IPI00385140	IPI00038378;IPI00795241;IPI00385140	ENOPH1;MASA;MSTP145	Q9UHY7-1;Q9UHY7;Q9UHY7-2;Q7Z508	0.234983		0.743218	1.19226	-0.141564	1.17896	1.67391	0.789931	2.2851	0.906536	2.26413	1	3	1	28.932	261	2.7	14.9	4.6	108.01	122.86	129.75				113.19	123.08	18.999				7631.2	115470	110780	285540	3370700	1582700	527180	823360	575220
2,3-epoxysqualene--lanosterol cyclase;Lanosterol synthase;Oxidosqualene--lanosterol cyclase;cDNA, FLJ92849, highly similar to Homo sapiens lanosterol synthase (2,3-oxidosqualene-lanosterol cyclase) (LSS), mRNA;cDNA FLJ58192, highly similar to Lanosterol synthase (EC 5.4.99.7)	IPI00009747;IPI00923506;IPI00923487;IPI00792647;REV__IPI00868831;REV__IPI00748045;REV__IPI00477126;REV__IPI00946303;IPI00791839;REV__IPI00947267;REV__IPI00945020	IPI00009747;IPI00923506;IPI00923487	LSS;OSC	P48449;B2R694;B4DJZ9	0.482385		-0.0921338	-0.0867063	-0.281312	0.0916175	0.938134	0.12137	0.94167	0.822842	1.06556	11	12	2	83.308	732	14.1	17.3	2.9	90.642	80.97	34.799	85.845	50.215	30.048	77.172	89.58	20.931	175.24	78.237	32.068	6559200	15854000	18236000	21941000	80632000	18995000	8979300	2141900	12888000
2,4-dienoyl-CoA reductase [NADPH];2,4-dienoyl-CoA reductase, mitochondrial;cDNA FLJ50204, highly similar to 2,4-dienoyl-CoA reductase, mitochondrial (EC 1.3.1.34);2,4-dienoyl-CoA reductase	IPI00003482;IPI00789705	IPI00003482	DECR;DECR1	Q16698;B7Z6B8;Q7LDK6	0.070257		0.91368	0.607768	0.71137	1.4219	1.88384	0.636898	1.5239	1.63736	2.67938	6	11	12	36.067	335	23.9	31.6	29.9	80.317	78.9	45.52	46.646	93.991	23.573	52.649	61.284	20.863	164.77	94.995	37.539	484550	3257000	2046500	18697000	106730000	82347000	9904400	20230000	30399000
2,5-phosphodiesterase 12	IPI00174390;IPI00886797	IPI00174390;IPI00886797	PDE12	Q6L8Q7-1;Q6L8Q7;Q6L8Q7-2	0.671202		-0.276662	0.210513	-0.763836		0.825499	0.401758	1.1571	0.588928		2	3	0	67.351	609	4.3	6.2	0	88.62	82.724	27.266	16.403	13.089	29.707	55.477	47.252	3.1001				4236900	2556000	5060400	2279200	10371000	2250800	0	0	0
205 kDa nucleoporin;Nuclear pore complex protein Nup205;Nucleoporin Nup205;cDNA FLJ50078, highly similar to Nuclear pore complex protein Nup205;NUP205 protein	IPI00783781;IPI00925674;IPI00925259;IPI00925071;IPI00909446;IPI00796587	IPI00783781;IPI00925674	C7orf14;KIAA0225;NUP205	Q92621;A6H8X3;B4DE72;Q4VBX7;Q6DKH1;Q6P486	0.018058	+	-0.797547	-0.684271	-1.01478	-0.693587	0.575326	0.072436	0.62232	0.494903	0.618314	12	10	2	227.92	2012	6.1	5.8	0.6	105.79	106.87	72.404	76.118	74.673	43.686	81.687	69.842	45.888	94.339	65.078	34.556	2757200	7920600	4514400	4539100	10813000	8064800	5848900	14772000	56728000
20-alpha-hydroxysteroid dehydrogenase;Aldo-keto reductase family 1 member C1;Chlordecone reductase homolog HAKRC;Dihydrodiol dehydrogenase 1/2;High-affinity hepatic bile acid-binding protein;Indanol dehydrogenase;Trans-1,2-dihydrobenzene-1,2-diol dehydrogenase;Aldo-keto reductase family 1, member C1 (Dihydrodiol dehydrogenase 1;20-alpha (3-alpha)-hydroxysteroid dehydrogenase);3-alpha-HSD1;3-alpha…	IPI00029733;IPI00514814;IPI00289524;IPI00642560;IPI00909130;IPI00909541;IPI00871915	IPI00029733;IPI00514814;IPI00289524	AKR1C1;DDH;DDH1;RP11-69D4.1-003;AKR1C4;CHDR	Q04828;Q5SR14;P17516	0.00425135	+	2.52424	2.20764	2.60121	2.76386	5.75269	1.1064	4.6192	6.06796	6.79209	3	8	8	36.788	323	10.8	25.4	32.5	111.95	120.67	159.62	32.331	55.117	29.738	52.665	62.445	29.131	178.63	108.12	97.692	1689900	4916700	7264200	3680500	11539000	11798000	7033100	8847700	15701000
214 kDa nucleoporin;Nuclear pore complex protein Nup214;Nucleoporin Nup214;Protein CAN;cDNA FLJ52369, highly similar to Nuclear pore complex protein Nup214;cDNA FLJ52377, highly similar to Nuclear pore complex protein Nup214;cDNA, FLJ79316, highly similar to Nuclear pore complex protein Nup214;cDNA, FLJ79334, highly similar to Nuclear pore complex protein Nup214;Nucleoporin 214kDa;Putative unchar…	IPI00900325;IPI00183294;IPI00900331;IPI00900318;IPI00646361	IPI00900325;IPI00183294;IPI00900331;IPI00900318;IPI00646361	CAIN;CAN;KIAA0023;NUP214;RP11-544A12.7-003;DKFZp686J0330	P35658-3;P35658;B4DYZ6;B4DZN4;B7ZAV2;B7ZAX0;Q5JUP9;Q7Z3C4;P35658-1;P35658-4;P35658-2;P35658-5	0.607118		-0.460149	-0.264356	-1.8662	0.750106	0.726911	0.708808	0.83257	0.274296	1.68192	16	3	5	213.69	2091	11.1	2.1	3.9	99.03	78.834	93.375	57.827	89.594	71.996	137.07	56.56	135.38	112.74	21.581	127.48	20408000	23613000	26752000	28526000	5296900	5764100	91825000	158570000	180090000
22 kDa actin-binding protein;Protein WS3-10;Smooth muscle protein 22-alpha;Transgelin;Transgelin variant;cDNA, FLJ94704, highly similar to Homo sapiens transgelin (TAGLN), mRNA;Putative uncharacterized protein DKFZp686P11128;TAGLN protein;Transgelin variant 2;Transgelin, isoform CRA_b	IPI00216138;IPI00556415;IPI00386638	IPI00216138;IPI00556415	SM22;TAGLN;WS3-10;DKFZp686P11128;hCG_2032895	Q01995;Q53GC9;Q5U0D2;Q6FI52;Q59FA5	0.25855		1.07627		1.5391	0.613432	2.10857	0.973147		2.90613	1.52989	0	1	3	22.611	201	0	5.5	20.4	110.46	124.85	154.1							217.38	115.14	55.269	0	0	0	601850	672280	1667200	2867000	3688100	2165800
22 kDa interstitial collagenase;27 kDa interstitial collagenase;Fibroblast collagenase;Interstitial collagenase;Matrix metalloproteinase-1;Matrix metalloproteinase 1 preproprotein variant;Matrix metalloproteinase 1 (Interstitial collagenase);cDNA FLJ54761, highly similar to Interstitial collagenase (EC 3.4.24.7);Matrix metalloproteinase 1;cDNA FLJ55228, highly similar to Interstitial collagenase …	IPI00008561;IPI00941021;IPI00924810	IPI00008561;IPI00941021;IPI00924810	CLG;MMP1	P03956;Q53FK3;Q53G75;Q53G96;Q5TZP0;B4DW26;A5GZ69;B4DN15;Q53G95;Q53G97;Q96DZ4	0.0590196		-3.12808	-1.80758	-3.01949	-4.55716	0.114381	0.123852	0.28567	0.123323	0.0424773	5	9	1	54.006	469	10.7	21.7	3	190.12	135.91	273.39	41.406	38.879	43.048	89.34	82.203	144.36				4127200	6243300	3611000	12431000	14406000	18729000	758840	376810	1099300
22 kDa neuronal tissue-enriched acidic protein;Brain acid soluble protein 1;Neuronal axonal membrane protein NAP-22	IPI00299024;IPI00908521	IPI00299024;IPI00908521	BASP1;NAP22	P80723-1;P80723;P80723-2	0.250947		0.871203	1.76926	-0.112367	0.956711	1.82919	1.2487	3.4088	0.925069	1.94088	9	11	4	22.693	227	69.6	70.5	41.9	134.1	138.17	150.53	78.522	52.516	24.08	95.884	94.048	33.062	162.43	108.57	11.542	3760900	85720000	82886000	2402300	35848000	40796000	2205800	96572000	36574000
220 kDa U5 snRNP-specific protein;p220;Pre-mRNA-processing-splicing factor 8;PRP8 homolog;Splicing factor Prp8;cDNA FLJ57882, highly similar to Pre-mRNA-processing-splicing factor 8;U5 snRNP-specific protein variant;Apoptosis-regulated protein 1;Apoptosis-regulated protein 2	IPI00007928;IPI00293274;IPI00874155;IPI00239117;REV__IPI00215913;REV__IPI00936549;IPI00952568;REV__IPI00952568;IPI00413147;REV__IPI00413147;IPI00418438;REV__IPI00418438;IPI00941380;REV__IPI00941380;IPI00414275;REV__IPI00414275;IPI00480172;REV__IPI00480172;IPI00719421;REV__IPI00719421;IPI00915317;REV__IPI00915317;IPI00871465;REV__IPI00871465;IPI00935789;REV__IPI00935789;IPI00926106;REV__IPI0092610…	IPI00007928	PRPC8;PRPF8	Q6P2Q9;B4DK16;Q53GM6;Q6JH02;Q6JH03	0.00426745	+	-0.740929	-0.810232	-0.765195	-0.647361	0.598354	0.0353077	0.57029	0.588374	0.638447	34	25	4	273.6	2335	16.1	12.5	2.5	100.8	100.54	40.024	73.277	83.639	41.585	103.01	96.433	27.649	83.219	58.214	27.348	5807400	19342000	11718000	9730500	46442000	40625000	28763000	73581000	155540000
23 kDa highly basic protein;60S ribosomal protein L13a;RPL13A protein;Ribosomal protein L13a variant;FWP004;Ribosomal protein L13a;Ribosomal protein L13a, isoform CRA_b;Novel protein similar to ribosomal protein L13a RPL13A	IPI00304612;IPI00398983;IPI00398949;IPI00936705;IPI00909017;IPI00432865	IPI00304612;IPI00398983;IPI00398949;IPI00936705	RPL13A;hCG_1998057;RPL13a;RP11-365K22.1-001	P40429;Q0VGL3;Q53H34;Q5QTS3;Q8J015;Q9BSQ6;Q5VY36	0.219237		-0.439564		-0.281906	-0.597221	0.737358	0.114182		0.822504	0.661026	0	20	3	23.577	203	0	53.2	18.7	119.41	115.58	68.702				108.45	126.22	106.13	275.18	106.79	48.181	0	0	0	76185000	163800000	165490000	33879000	63167000	40476000
24-dehydrocholesterol reductase;3-beta-hydroxysterol delta-24-reductase;Diminuto/dwarf1 homolog;Seladin-1;cDNA FLJ58891, highly similar to 24-dehydrocholesterol reductase (EC 1.3.1.-);cDNA FLJ53870, highly similar to 24-dehydrocholesterol reductase (EC1.3.1.-);cDNA, FLJ79318, highly similar to 24-dehydrocholesterol reductase (EC 1.3.1.-);cDNA FLJ55321, highly similar to 24-dehydrocholesterol redu…	IPI00016703;IPI00922928;IPI00922718;IPI00647760	IPI00016703;IPI00922928	DHCR24;KIAA0018;Nbla03646	Q15392;B7Z546;B7Z817;B7ZAV4;Q3LIE7;B7Z919	0.027985	+	-1.75458	-1.69152	-2.30258	-1.26963	0.29636	0.106034	0.3096	0.2027	0.414766	12	12	1	60.101	516	13.6	17.6	1.4	132.4	126.74	123.51	123.36	118.82	42.17	87.1	86.172	88.178				7154100	22663000	13498000	18323000	45523000	22040000	87351	2428600	640030
25 kDa brain-specific protein;p24;p25-alpha;TPPP/p25;Tubulin polymerization-promoting protein;Brain-specific protein p25 alpha, isoform CRA_b;cDNA FLJ30358 fis, clone BRACE2007749, highly similar to Tubulin polymerization-promoting protein;Fibroblast growth factor-2 repression protein-1;Tubulin polymerization promoting protein	IPI00013043	IPI00013043	TPPP;TPPP1;FREP1;hCG_16469	O94811;Q4L233	0.0514196		2.43756		2.63487	2.24025	5.41724	1.05104		6.21118	4.72478	0	1	4	23.693	219	0	7.8	32.9	198.2	204.36	211.25							366.96	136.23	183.87	0	0	0	1770500	792250	675830	1909500	3656400	683770
25 kDa FK506-binding protein;FK506-binding protein 3;Immunophilin FKBP25;Peptidyl-prolyl cis-trans isomerase FKBP3;Rapamycin-selective 25 kDa immunophilin;Rotamase;FK506-binding protein 3 variant	IPI00024157	IPI00024157	FKBP25;FKBP3	Q00688;Q53GD8	0.405768		0.719038		0.186607	1.25147	1.64608	0.878761		1.13808	2.38084	0	16	25	25.177	224	0	42.9	83.5	149.46	145.68	81.509				90.356	100.26	25.404	185.81	188.61	41.026	0	0	0	42981000	221400000	139640000	17483000	278070000	129330000
250/210 kDa paraneoplastic pemphigus antigen;Desmoplakin;cDNA FLJ53584, highly similar to Desmoplakin;cDNA FLJ51487, highly similar to Desmoplakin;cDNA FLJ61543, highly similar to Desmoplakin;DSP variant protein	IPI00013933;IPI00217182;IPI00746877;IPI00872333;IPI00952810	IPI00013933;IPI00217182	DSP;DSP variant protein	P15924-1;P15924;P15924-2;B4DKX6;B4DWT7;B4E2A0;Q4LE79	0.198969		1.21242	0.0301242	1.37572	2.23141	2.31726	1.84371	1.0211	2.59498	4.69594	45	59	11	331.77	2871	17.5	22.5	5.4	120.97	133.08	85.535	104.73	120.94	56.687	129.64	125.3	42.718	146.99	107.62	79.295	9315600	16308000	16008000	41096000	79380000	75525000	71655000	29881000	47923000
256 kDa golgin;Golgin subfamily A member 4;Golgin-245;Protein 72.1;Trans-Golgi p230;cDNA FLJ77065, highly similar to Homo sapiens golgi autoantigen, golgin subfamily a, 4 (GOLGA4), mRNA;cDNA FLJ54338, highly similar to Golgin subfamily A member 4;Golgi autoantigen, golgin subfamily a, 4 variant;CTCL tumor antigen se20-7	IPI00927614;IPI00013272;IPI00220522;IPI00927117;IPI00925587;IPI00927872;IPI00220521;IPI00926947;IPI00926736	IPI00927614;IPI00013272;IPI00220522;IPI00927117	GOLGA4	Q13439-3;Q13439;A8K3D5;B4DTF3;Q59EW8;Q13439-1;Q13439-4;Q9H2G3	0.656139		-0.138633	-0.369837		0.0925709	0.908379	0.206757	0.77387		1.06627	5	0	1	262.33	2243	2.6	0	0.4	111.92	91.795	69.686	58.617	76.758	19.172							3003800	1348600	1346200	0	0	0	17727	139320	204850
2-5-oligoadenylate-binding protein;ATP-binding cassette sub-family E member 1;HuHP68;Ribonuclease 4 inhibitor;RNase L inhibitor	IPI00303207	IPI00303207	ABCE1;OK/SW-cl.40;RLI;RNASEL1;RNASELI;RNS4I	P61221	0.0655995		-0.315944	-0.274146	-0.479851	-0.193835	0.803325	0.0806606	0.82694	0.717051	0.874279	10	12	4	67.314	599	18.4	21.2	10.2	139.43	150.52	49.446	94.104	84.184	30.323	100.96	154.44	81.485	63.265	47.683	51.025	10318000	21123000	23657000	14736000	91735000	54023000	3458100	11605000	6689600
26 kDa prosomal protein;Macropain beta chain;Multicatalytic endopeptidase complex beta chain;Proteasome chain 3;Proteasome subunit beta type-4;cDNA FLJ56661, highly similar to Proteasome subunit beta type 4 (EC 3.4.25.1)	IPI00555956	IPI00555956	PROS26;PSMB4	P28070;B4DFL3	0.624913		0.277398		-0.137635	0.692432	1.21201	0.499922		0.909008	1.616	0	7	4	29.204	264	0	38.6	22.3	91.431	85.656	64.909				37.595	51.657	4.9262	146.83	106.4	32.657	0	0	0	24599000	80348000	70525000	4733000	36431000	21484000
26S protease regulatory subunit 10B;26S proteasome AAA-ATPase subunit RPT4;Proteasome 26S subunit ATPase 6;Proteasome subunit p42	IPI00926977;IPI00021926;IPI00178056;IPI00910829;IPI00878838	IPI00926977;IPI00021926;IPI00178056	PSMC6;SUG2	P62333	0.0653598		0.740532	0.545474	0.537173	1.13895	1.67079	0.43124	1.4595	1.45113	2.20221	23	21	13	45.796	403	63.5	59.1	31.3	126.78	123.63	75.614	81.789	85.673	23.416	86.807	99.666	27.067	243.61	188.89	29.422	36580000	146450000	70764000	64785000	283610000	218000000	25515000	40882000	33555000
26S protease regulatory subunit 4;26S proteasome AAA-ATPase subunit RPT2;Proteasome 26S subunit ATPase 1;cDNA FLJ58247, highly similar to 26S protease regulatory subunit 4;Proteasome 26S ATPase subunit 1 variant;cDNA, FLJ93843, Homo sapiens proteasome (prosome, macropain) 26S subunit, ATPase, 1(PSMC1), mRNA;Proteasome (Prosome, macropain) 26S subunit, ATPase, 1;Proteasome (Prosome, macropain) 26S…	IPI00011126;IPI00848107;IPI00895901;IPI00889191	IPI00011126;IPI00848107	PSMC1;hCG_2029049	P62191;B4DR63;Q53HB3;Q53XL8;Q6NW36	0.340241		0.41786	0.485015	-0.195726	0.964292	1.33594	0.539034	1.3996	0.873134	1.95111	23	13	14	49.184	440	52.5	35.2	33.9	133.89	123.24	72.373	128.26	134.92	26.102	67.36	92.072	57.3	181.42	154.85	29.55	30182000	94849000	90812000	28716000	185450000	58538000	14240000	30674000	59248000
26S protease regulatory subunit 6A;26S proteasome AAA-ATPase subunit RPT5;Proteasome 26S subunit ATPase 3;Proteasome subunit P50;Tat-binding protein 1;cDNA FLJ75299, highly similar to Xenopus laevis proteasome (prosome, macropain) 26S subunit, ATPase 3, mRNA	IPI00018398;IPI00908692	IPI00018398	PSMC3;TBP1	P17980;A8K781	0.185036		0.428369	0.627607	-0.00201836	0.659517	1.34571	0.325896	1.545	0.998602	1.57955	24	16	15	49.203	439	54.9	38.7	33.3	124.15	117.5	69.299	117.04	125.82	32.072	92.889	106.52	73.571	166	163.78	42.702	30679000	154040000	75548000	47091000	166280000	185370000	24004000	86279000	46754000
26S protease regulatory subunit 6B;26S proteasome AAA-ATPase subunit RPT3;MB67-interacting protein;MIP224;Proteasome 26S subunit ATPase 4;Tat-binding protein 7;cDNA FLJ78505, highly similar to Homo sapiens proteasome (prosome, macropain) 26S subunit, ATPase, 4 (PSMC4), transcript variant 1, mRNA;cDNA, FLJ93682, Homo sapiens proteasome (prosome, macropain) 26S subunit, ATPase, 4(PSMC4), transcript…	IPI00020042;IPI00738042;IPI00216770	IPI00020042;IPI00738042;IPI00216770	MIP224;PSMC4;TBP7;hCG_43346	P43686-1;P43686;A8K2M0;P43686-2	0.369309		0.269109	0.398569	-0.185359	0.594117	1.20506	0.323054	1.3182	0.87943	1.50955	23	17	13	47.366	418	62.4	47.1	38.8	129.24	119.98	62.152	139.47	132.45	33.739	89.36	110.79	61.374	160.9	167.07	32.362	19472000	175140000	82919000	93850000	243410000	227250000	10632000	118150000	52812000
26S protease regulatory subunit 7;26S proteasome AAA-ATPase subunit RPT1;Proteasome 26S subunit ATPase 2;Protein MSS1;cDNA FLJ52010, highly similar to 26S protease regulatory subunit 7;cDNA FLJ52353, highly similar to 26S protease regulatory subunit 7;Putative uncharacterized protein PSMC2	IPI00021435;IPI00927053;IPI00879409	IPI00021435	MSS1;PSMC2	P35998;A4D0Q1;B7Z571;B7Z5E2;Q3LIA5;Q75L23	0.199548		0.37075	0.546759	-0.0211954	0.586688	1.29303	0.28703	1.4608	0.985416	1.50179	23	15	10	48.633	433	52.7	44.1	28.6	109.99	104.12	68.993	117.58	114.83	32.646	66.779	89.516	48.577	80.265	89.729	27.02	42963000	113690000	123530000	42646000	244050000	239800000	12802000	57194000	30551000
26S protease regulatory subunit 8;26S proteasome AAA-ATPase subunit RPT6;p45/SUG;Proteasome 26S subunit ATPase 5;Proteasome subunit p45;Thyroid hormone receptor-interacting protein 1;cDNA FLJ75514, highly similar to S.scrofa putative 26S protease subunit;Proteasome (Prosome, macropain) 26S subunit, ATPase, 5, isoform CRA_b;Proteasome 26S ATPase subunit 5 variant	IPI00023919;IPI00745502;IPI00555749;IPI00794839;IPI00896543	IPI00023919;IPI00745502;IPI00555749	PSMC5;SUG1;hCG_41818	P62195;A8K3Z3;Q59GS3	0.0488625	+	0.487677	0.541614	0.272524	0.648892	1.40218	0.184211	1.4556	1.20792	1.56796	18	14	13	45.626	406	51	48.5	38.9	108.06	100.78	71.262	103.33	118.21	47.049	68.629	78.298	46.276	142.02	132.96	34.147	56350000	37073000	78410000	15267000	77108000	42318000	18120000	82187000	51685000
26S protease subunit S5 basic;26S proteasome non-ATPase regulatory subunit 5;26S proteasome subunit S5B;cDNA FLJ76282, highly similar to Homo sapiens proteasome (prosome, macropain) 26S subunit, non-ATPase, 5 (PSMD5), mRNA;cDNA FLJ52877, highly similar to 26S proteasome non-ATPase regulatory subunit 5	IPI00002134;IPI00909766;IPI00607835;IPI00607806	IPI00002134;IPI00909766	KIAA0072;PSMD5	Q16401;A8K4T6;B4DZM8	0.069663		0.926683	0.787934	0.56514	1.42697	1.9009	0.638919	1.7266	1.47953	2.68882	13	12	5	56.195	504	31.9	31.3	11.9	120.48	127.86	104.07	102.85	113.64	25.079	84.275	105.17	30.281	219.87	228.35	31.645	20134000	22192000	53471000	40248000	142320000	156870000	2236200	7677700	10869000
26S proteasome non-ATPase regulatory subunit 1;26S proteasome regulatory subunit RPN2;26S proteasome regulatory subunit S1;26S proteasome subunit p112;cDNA, FLJ92896, highly similar to Homo sapiens proteasome (prosome, macropain) 26S subunit, non-ATPase, 1 (PSMD1), mRNA;PSMD1 protein	IPI00299608;IPI00456695;IPI00917594;IPI00916632;IPI00916809;IPI00916965	IPI00299608;IPI00456695	PSMD1	Q99460-1;Q99460;B2R6D0;Q05BX4;Q05CW6;Q99460-2	0.0677304		0.647393	0.805705	0.292793	0.843681	1.56634	0.316268	1.748	1.22501	1.79462	19	16	10	105.84	953	27.7	22.4	11.2	125.13	117.85	68.91	114.23	100.09	23.315	109.96	113.62	30.163	125.06	140.08	32.21	90687000	131010000	88850000	20285000	45144000	46685000	33798000	178140000	83639000
26S proteasome non-ATPase regulatory subunit 10;26S proteasome regulatory subunit p28;Gankyrin;p28(GANK);Proteasome (Prosome, macropain) 26S subunit, non-ATPase, 10	IPI00003565;IPI00027699;IPI00552190;IPI00183104;IPI00647839;IPI00552808	IPI00003565;IPI00027699;IPI00552190	PSMD10;RP5-889N15.3-006;RP5-889N15.3-004	O75832;Q5U0B2;B1AJY7;B1AJY5	0.131023		1.62623		1.28673	1.96573	3.08705	1.03687		2.43974	3.9061	0	3	5	24.428	226	0	8	36.7	148.25	148.67	127.4				66.11	119.48	12.499	118.16	218.79	46.497	0	0	0	387290	8427700	9184400	3965800	122650000	26250000
26S proteasome non-ATPase regulatory subunit 11;26S proteasome regulatory subunit p44.5;26S proteasome regulatory subunit RPN6;26S proteasome regulatory subunit S9;cDNA FLJ58882, highly similar to 26S proteasome non-ATPase regulatory subunit 11;Proteasome 26S non-ATPase subunit 11 variant	IPI00105598;IPI00790498	IPI00105598	PSMD11	O00231;B4DTS5;Q53FT5	0.0677281		0.859421	0.463413	0.8356	1.27925	1.81431	0.528599	1.3788	1.7846	2.42713	13	17	9	47.534	423	32.4	39.2	26.2	108.81	99.965	73.026	84.045	100.97	40.688	45.286	69.449	52.615	178.85	140.57	26.831	13872000	47379000	28066000	37849000	167340000	194950000	36078000	37815000	70423000
26S proteasome non-ATPase regulatory subunit 12;26S proteasome regulatory subunit p55;26S proteasome regulatory subunit RPN5;cDNA FLJ33879 fis, clone CTONG2007091, highly similar to 26S proteasome non-ATPase regulatory subunit 12;Proteasome (Prosome, macropain) 26S subunit, non-ATPase, 12, isoform CRA_c;Putative uncharacterized protein PSMD12	IPI00185374;IPI00335069	IPI00185374;IPI00335069	PSMD12;hCG_1749256	O00232;A6NP15	0.120851		0.490667	0.608242	0.12246	0.7413	1.40509	0.30321	1.5244	1.08859	1.67168	20	16	6	52.904	456	43.4	37.5	17.1	131.88	123.73	62.141	138.48	145.04	17.977	90.477	97.414	38.156	184.85	149.45	23.997	141670000	67455000	37734000	194300000	199700000	162270000	3987700	7834500	12758000
26S proteasome non-ATPase regulatory subunit 14;26S proteasome regulatory subunit RPN11;26S proteasome-associated PAD1 homolog 1;Putative uncharacterized protein PSMD14	IPI00024821;IPI00936088;IPI00915790	IPI00024821	POH1;PSMD14	O00487;Q4ZG77	0.0827827		0.594582	0.610322	0.270713	0.902713	1.51004	0.331653	1.5266	1.2064	1.86958	3	7	9	34.577	310	16.5	32.3	40.6	113.44	98.111	80.747	59.881	60.007	26.271	48.259	65.077	11.952	162.69	133.05	45.582	1114900	7526600	2981200	27118000	74699000	23939000	9278800	18765000	23785000
26S proteasome non-ATPase regulatory subunit 2;26S proteasome regulatory subunit RPN1;26S proteasome regulatory subunit S2;26S proteasome subunit p97;Protein 55.11;Tumor necrosis factor type 1 receptor-associated protein 2;cDNA FLJ53357, highly similar to 26S proteasome non-ATPase regulatory subunit 2;cDNA FLJ54077, highly similar to 26S proteasome non-ATPase regulatory subunit 2;Proteasome (Pros…	IPI00012268;IPI00926410;IPI00384420;IPI00925437;IPI00793022;IPI00795529;IPI00793806;IPI00925595;IPI00794424;IPI00925813;REV__IPI00885176	IPI00012268;IPI00926410	PSMD2;TRAP2;DKFZp564A2282	Q13200;B4DM22;B4DX07;Q53XQ4;Q59EG8;Q9NSM5;B4DXY1	0.0402922	+	0.644527	0.687777	0.394828	0.850975	1.56323	0.246271	1.6108	1.31479	1.80372	29	21	10	100.2	908	37.6	30.7	15.2	136.79	121.23	67.768	117.47	90.327	30.872	115.62	120.01	40.154	157.19	139	25.188	47194000	125650000	80878000	35793000	245010000	158740000	53916000	370970000	198980000
26S proteasome non-ATPase regulatory subunit 3;26S proteasome regulatory subunit RPN3;26S proteasome regulatory subunit S3;Proteasome subunit p58;cDNA FLJ30049 fis, clone ADRGL1000033, highly similar to 26S proteasome non-ATPase regulatory subunit 3;cDNA FLJ56054, highly similar to 26S proteasome non-ATPase regulatory subunit 3;cDNA FLJ55739, highly similar to 26S proteasome non-ATPase regulatory…	IPI00011603;IPI00383659	IPI00011603	PSMD3	O43242;B3KNN7;B4DEB0;B4DPM7;B4DT72;B4DV84;Q6IBN0;Q8N9M2;Q96N86	0.0877555		0.565877	0.673737	0.215077	0.808816	1.48029	0.306197	1.5952	1.16077	1.75177	18	16	10	60.977	534	39.3	32.8	23	112.26	106.46	73.741	68.328	69.973	19.321	77.708	103.18	47.077	105.96	102.71	30.981	28818000	98382000	83379000	91117000	316800000	261140000	21335000	50078000	69403000
26S proteasome non-ATPase regulatory subunit 4;26S proteasome regulatory subunit RPN10;26S proteasome regulatory subunit S5A;Antisecretory factor 1;Multiubiquitin chain-binding protein;Proteasome (Prosome, macropain) 26S subunit, non-ATPase, 4	IPI00022694;IPI00853509;IPI00853609;IPI00853415	IPI00022694;IPI00853509	MCB1;PSMD4;RP11-126K1.1-014	P55036-1;P55036;A6PVX3	0.240918		0.334049	0.29772	0.00275818	0.70167	1.26055	0.316065	1.2292	1.00191	1.62639	10	4	8	40.736	377	28.4	18	22	85.732	86.592	63.311	69.183	85.759	27.828	68.747	55.916	56.67	121.54	109.42	24.827	42310000	308700000	26062000	54346000	301380000	39132000	5296300	35193000	16194000
26S proteasome non-ATPase regulatory subunit 6;26S proteasome regulatory subunit RPN7;26S proteasome regulatory subunit S10;Breast cancer-associated protein SGA-113M;p42A;Phosphonoformate immuno-associated protein 4;Proteasome regulatory particle subunit p44S10;Proteasome (Prosome, macropain) 26S subunit, non-ATPase, 6, isoform CRA_b;Putative uncharacterized protein PSMD6;KIAA0107 isoform;Proteas…	IPI00014151;IPI00793381;IPI00794383;IPI00946249;IPI00795037;IPI00794344;IPI00945689;IPI00947396;IPI00793676	IPI00014151;IPI00793381;IPI00794383;IPI00946249;IPI00795037;IPI00794344;IPI00945689	KIAA0107;PFAAP4;PSMD6;hCG_23509	Q15008;A8K2E0;C9IZE4;Q6UV22;B3KT66;C9J0E9	0.0181626	+	1.06451	1.18789	0.774676	1.23097	2.09147	0.34923	2.2782	1.71081	2.34725	13	15	7	45.531	389	32.6	44.5	21.3	141.61	151.3	82.763	108.07	107.75	16.931	123.68	128.3	25.486	239.83	233.49	30.673	27219000	43854000	42422000	1811700000	232520000	104410000	314160000	119080000	104500000
26S proteasome non-ATPase regulatory subunit 7;26S proteasome regulatory subunit RPN8;26S proteasome regulatory subunit S12;Mov34 protein homolog;Proteasome subunit p40;cDNA, FLJ96428, highly similar to Homo sapiens proteasome (prosome, macropain) 26S subunit, non-ATPase, 7 (Mov34 homolog) (PSMD7), mRNA;cDNA FLJ51373, highly similar to 26S proteasome non-ATPase regulatory subunit 7	IPI00019927	IPI00019927	MOV34L;PSMD7	P51665;B2RD27;B4DXI8	0.0104286	+	1.0132	0.936138	0.883875	1.21957	2.01838	0.261692	1.9134	1.84532	2.32878	10	9	12	37.025	324	33.6	29.3	37.3	92.33	96.391	71.834	98.578	112.28	21.906	61.32	69.468	14.355	107.96	120.1	24.198	85931000	55352000	38073000	8141000	64599000	42319000	17614000	121690000	73676000
26S proteasome non-ATPase regulatory subunit 9;26S proteasome regulatory subunit p27;Putative uncharacterized protein PSMD9	IPI00010860;IPI00216220;IPI00953045;IPI00790097;IPI00791380;IPI00789338;IPI00790782	IPI00010860;IPI00216220;IPI00953045	PSMD9	O00233-1;O00233;O00233-2;C9JR25	0.173605		1.94941		1.40423	2.4946	3.86217	2.1135		2.64676	5.63571	0	3	9	24.653	223	0	14.8	39	152	134.66	96.808				99.72	133.57	17.759	232.57	160.21	48.231	0	0	0	3859900	5490700	2747500	3096200	9576500	14723000
27 kDa prosomal protein;Macropain iota chain;Multicatalytic endopeptidase complex iota chain;Proteasome iota chain;Proteasome subunit alpha type-6;cDNA FLJ52022, highly similar to Proteasome subunit alpha type 6 (EC 3.4.25.1);cDNA, FLJ79122, highly similar to Proteasome subunit alpha type 6 (EC 3.4.25.1);cDNA FLJ51729, highly similar to Proteasome subunit alpha type 6 (EC 3.4.25.1);Proteasome (Pr…	IPI00029623;IPI00867679;IPI00888766	IPI00029623;IPI00867679	PROS27;PSMA6;hCG_21177	P60900;B4DQR4;B4DXJ9;Q9BZ93	0.585947		0.556827		-0.175045	1.2887	1.47103	1.1012		0.88574	2.44308	0	11	9	27.399	246	0	55.7	40.7	91.799	96.664	67.162				50.237	74.957	24.856	184.03	128.92	48.045	0	0	0	12750000	50395000	56827000	3297800	18594000	16101000
28 kDa heat- and acid-stable phosphoprotein;PDGFA-associated protein 1;PDGF-associated protein	IPI00013297;IPI00926884	IPI00013297	HASPP28;PDAP1	Q13442	0.960286		-0.0406612		-0.691623	0.610301	0.972209	0.641644		0.619157	1.52658	0	2	12	20.63	181	0	13.3	49.7	162.81	116.52	106.28				22.879	72.598	16.562	247.24	142.37	31.538	0	0	0	2002700	7525100	1327000	5112500	32641000	21491000
28 kDa heat shock protein;Estrogen-regulated 24 kDa protein;Heat shock 27 kDa protein;Heat shock protein beta-1;Stress-responsive protein 27;cDNA FLJ52243, highly similar to Heat-shock protein beta-1;Putative uncharacterized protein HSPB1	IPI00025512;IPI00909453;IPI00924436	IPI00025512;IPI00909453	HSP27;HSP28;HSPB1	P04792;B4DL87;C9J3N8	0.00118034	+	4.10833	3.87371	4.36198	4.08929	17.2477	2.97156	14.659	20.563	17.0216	2	12	15	22.782	205	16.6	83.4	89.3	146.76	115.53	148.69	33.842	12.955	40.317	84.468	93.688	58.928	206.16	127.2	104.06	165330	654100	275190	107900000	1771200000	258070000	42668000	563680000	110950000
28S ribosomal protein S13, mitochondrial;28S ribosomal protein S26, mitochondrial	IPI00006606	IPI00006606	C20orf193;MRPS26;RPMS13	Q9BYN8	0.307418		-0.817298		-1.2458	-0.388796	0.567504	0.241896		0.421674	0.763767	0	5	2	24.211	205	0	31.7	9.3	133.88	119.76	64.831				99.014	129.56	22.131	315.53	205.86	46.787	0	0	0	7641200	15579000	3800700	2025300	3866600	770280
28S ribosomal protein S15, mitochondrial;cDNA FLJ56752, highly similar to 28S ribosomal protein S15, mitochondrial (S15mt);Mitochondrial ribosomal protein S15 variant	IPI00550037;IPI00555996	IPI00550037;IPI00555996	DC37;MRPS15;RPMS15	P82914;B4DYW3;Q59EA6	0.0792741		-0.492151	-0.430548	-0.553754		0.710964	0.042946	0.74198	0.681245		1	2	0	29.842	257	2.7	8.2	0	138.95	103.69	62.368				278.85	212.86	25.108				238500	4377700	449700	37590000	7082300	2100200	0	0	0
28S ribosomal protein S18-2, mitochondrial;28S ribosomal protein S18b, mitochondrial;cDNA, FLJ92156, Homo sapiens mitochondrial ribosomal protein S18B (MRPS18B),nuclear gene encoding mitochondrial protein, mRNA;Mitochondrial ribosomal protein S18B;cDNA FLJ54285, highly similar to 28S ribosomal protein S18b, mitochondrial;Putative uncharacterized protein ENSP00000365691	IPI00022316;IPI00445391	IPI00022316;IPI00445391	C6orf14;HSPC183;MRPS18B;PTD017;DAMA-178G23.8-001;DAMC-83F13.5-001;DADB-129D20.6-003;DAMA-178G23.8-003;DAMC-83F13.5-003;DAQB-47P19.5-003;DASS-182C6.3-003;XXbac-BCX48F10.3-003;XXbac-BPG249D20.2-003	Q9Y676;B0S7P4;B4DFG6;Q5STN0	0.0426419	+	-1.12088	-1.04094	-1.5693	-0.752406	0.459813	0.128876	0.48601	0.336973	0.593613	5	5	3	29.395	258	24.8	36.4	15.9	142.58	92.128	109.26	116.53	114.71	37.817	219.15	80.698	17.414	139.66	63.366	61.887	1238600	2306300	2392300	6943700	20588000	6666900	394230	4207100	1849700
28S ribosomal protein S22, mitochondrial;cDNA FLJ78575;cDNA PSEC0127 fis, clone PLACE1003724, highly similar to Mitochondrial 28S ribosomal protein S22;Mitochondrial ribosomal protein S22 variant	IPI00013146;IPI00793335;IPI00791542;IPI00789525;IPI00944990;IPI00792175;IPI00945124;IPI00795908;IPI00946566	IPI00013146;IPI00793335;IPI00791542;IPI00789525;IPI00944990	C3orf5;GK002;MRPS22;RPMS22	P82650;A8K9Y7;Q8NBL6;Q59GX8;C9JZT4;C9JQ54	0.162939		-0.649506	-0.81947	-0.479541		0.637499	0.106459	0.56665	0.717206		5	8	0	41.28	360	16.7	20.8	0	153.5	134.52	104.01	57.441	67.393	70.223	137.98	156.35	32.387				10233000	6542200	10057000	15560000	56510000	11935000	0	0	0
28S ribosomal protein S23, mitochondrial	IPI00032881	IPI00032881	CGI-138;HSPC329;MRPS23	Q9Y3D9	0.358834		-0.663566		-1.08298	-0.244156	0.631316	0.263224		0.472054	0.844309	0	6	2	21.77	190	0	36.3	10.5	142.3	85.353	100.22				79.734	72.199	18.231	98.407	107.51	11.772	0	0	0	23182000	49108000	62266000	5348200	20435000	17775000
28S ribosomal protein S28, mitochondrial;28S ribosomal protein S35, mitochondrial;Putative uncharacterized protein MRPS35	IPI00073779;IPI00789834;IPI00168292;IPI00789140	IPI00073779;IPI00789834;IPI00168292;IPI00789140	HDCMD11P;MDS023;MRPS28;MRPS35;PSEC0213	P82673-1;P82673;C9JQV1;P82673-2	0.0235319	+	-0.939922	-1.16085	-0.996895	-0.662023	0.521261	0.0950134	0.44725	0.501077	0.631991	3	5	1	36.844	323	15.8	19.8	8.4	127.58	99.496	111.21	102.19	109.82	31.959	37.408	40.561	26.267				3160900	14207000	4600400	5845100	26406000	14421000	219980	161630	400030
28S ribosomal protein S29, mitochondrial;Death-associated protein 3;Ionizing radiation resistance conferring protein;cDNA FLJ57409, highly similar to Mitochondrial 28S ribosomal protein S29;Death associated protein 3, isoform CRA_d;cDNA FLJ57664, highly similar to Mitochondrial 28S ribosomal protein S29	IPI00018120;IPI00910684	IPI00018120;IPI00910684	DAP3;MRPS29;hCG_17177	P51398;B4DP59;Q68CT7;B4DY62	0.059722		-0.640226	-0.373757	-0.608147	-0.938775	0.641612	0.125163	0.77177	0.656039	0.521676	3	6	1	45.566	398	7.8	16.6	4.8	135.76	88.131	109.6	48.063	23.035	57.613	84.519	74.593	15.287	51.444	44.343	7.1012	5152200	8838700	10676000	32360000	53765000	13919000	929420	4937600	4873800
28S ribosomal protein S30, mitochondrial;Programmed cell death protein 9;Mitochondrial ribosomal protein S30 variant;MRPS30 protein	IPI00010278	IPI00010278	BM-047;MRPS30;PDCD9	Q9NP92;Q53GN7;Q53H77;Q9BUN6	0.224816		-0.967337	-0.610786	-1.32389		0.511449	0.180583	0.65484	0.399457		3	2	0	50.364	439	10.3	10.3	0	135.7	87.246	121.45	79.282	52.617	35.374	17.972	29.778	19.103				2307100	5344000	4858900	1676200	7612400	2986300	0	0	0
28S ribosomal protein S31, mitochondrial;Imogen 38	IPI00294242;REV__IPI00412740;REV__IPI00418575;REV__IPI00797566	IPI00294242	IMOGN38;MRPS31	Q92665	0.292679		-0.301576	-0.581065	0.116864	-0.440527	0.811366	0.223016	0.66847	1.08438	0.736865	7	5	1	45.318	395	20.3	15.2	2	147.93	102.09	90.135	138.26	83.203	19.295	53.954	90.033	63.871				8288000	9005900	8070200	3464000	14312000	4503700	121560	172940	157330
28S ribosomal protein S5, mitochondrial	IPI00169400;IPI00215872;IPI00908489;IPI00942232	IPI00169400	MRPS5	P82675-1;P82675	0.0459187	+	-0.708005	-0.501667	-1.01657	-0.605779	0.612166	0.110961	0.70629	0.494291	0.657117	5	4	2	48.006	430	17.4	10	4.2	148.52	92.041	104.59	66.439	52.286	67.157	49.917	59.082	43.155	358.55	152.04	4.879	4445500	5887300	5318900	3995400	8894000	6103900	5266600	6604800	5840200
28S ribosomal protein S7, mitochondrial;bMRP-27a;Mitochondrial ribosomal protein S7	IPI00006440	IPI00006440	MRPS7	Q9Y2R9;Q96Q63	0.24635		-0.940424		-1.32366	-0.557189	0.52108	0.198064		0.399521	0.679625	0	4	1	28.162	242	0	20.7	3.3	158.05	149.21	84.211				48.14	100.59	29.983				0	0	0	16970000	37586000	31834000	821730	386400	442380
28S ribosomal protein S9, mitochondrial;MRPS9 protein	IPI00641924;IPI00916714	IPI00641924	MRPS9;RPMS9	P82933;Q86WV4	0.144899		-0.707263	-1.26878	-0.624896	-0.228111	0.612481	0.219522	0.41501	0.648466	0.853752	6	4	1	45.834	396	13.9	10.1	3.5	168.91	126.51	125.16	114.4	89.089	65.341	191.9	195.4	9.6239				2820200	4315600	2290800	35816000	22183000	26768000	541930	504490	3214500
2-amino-3-ketobutyrate coenzyme A ligase, mitochondrial;Aminoacetone synthase;Glycine acetyltransferase;cDNA FLJ77874, highly similar to Homo sapiens glycine C-acetyltransferase (2-amino-3-ketobutyrate coenzyme A ligase), mRNA	IPI00879060;IPI00026492;IPI00446745;IPI00878588	IPI00879060;IPI00026492	GCAT;KBL	O75600;A8K228	0.288427		-1.15225	-1.71321	-0.591296		0.449921	0.253686	0.30498	0.663746		2	2	0	47.974	445	7	7.9	0	95.449	46.246	99.845	29.377	9.1318	24.479	32.169	44.085	8.2655				635670	2189700	832980	5018700	7453900	2267100	0	0	0
2-aminoethanethiol dioxygenase;Cysteamine dioxygenase;cDNA FLJ45793 fis, clone NT2RI2009233	IPI00045939	IPI00045939	ADO;C10orf22	Q96SZ5;B3KXN9	0.263419		1.11732	0.626673		1.60797	2.16944	1.06365	1.544		3.04822	1	0	4	29.751	270	5.6	0	15.6	162.96	110.1	112.93							93.565	190.43	27.934	356090	216180	1032200	0	0	0	1664800	3020300	3504900
2-arachidonoylglycerol hydrolase;Abhydrolase domain-containing protein 12;Monoacylglycerol lipase ABHD12	IPI00060569;IPI00394779;IPI00930555;IPI00514906	IPI00060569;IPI00394779;IPI00930555	ABHD12;C20orf22	Q8N2K0-2;Q8N2K0;Q8N2K0-1;Q8N2K0-3	0.421471		-0.32969	-0.408569	-0.855432	0.274931	0.795707	0.336818	0.75337	0.5527	1.20994	4	3	2	45.558	404	11.1	8.2	5	93.281	103.55	56.315	149.31	126.71	57.741	59.37	84.431	23.694	31.517	7.5229	26.976	3069100	3208500	6010200	328450	3564800	1128200	1173500	1156900	4686000
2C4D;Class II mMOB1;Mob1 homolog 3;Mps one binder kinase activator-like 3;Preimplantation protein 3;cDNA FLJ76596, highly similar to Homo sapiens preimplantation protein 3 (PREI3), transcript variant 2, mRNA;cDNA FLJ55109, highly similar to Preimplantation protein 3;Preimplantation protein 3, isoform CRA_d;cDNA FLJ52887, highly similar to Preimplantation protein 3	IPI00386122;IPI00856011;IPI00398774;IPI00915769	IPI00386122;IPI00856011;IPI00398774;IPI00915769	CGI-95;MOB3;MOBKL3;PREI3;hCG_20091	Q9Y3A3-1;Q9Y3A3;A8K012;Q53SE0;B4DML0;Q9Y3A3-2;B4DM50	0.762341		0.233801		-0.363115	0.830716	1.17593	0.707873		0.777484	1.77857	0	2	1	26.032	225	0	14.2	4.4	174.37	156.11	92.08										0	0	0	68070	133060	605100	102730	262000	925610
2-hydroxyacyl-CoA lyase 1;2-hydroxyphytanoyl-CoA lyase;Phytanoyl-CoA 2-hydroxylase 2;cDNA FLJ53672, highly similar to 2-hydroxyphytanoyl-CoA lyase (EC 4.1.-.-);cDNA FLJ58815, highly similar to 2-hydroxyphytanoyl-CoA lyase (EC 4.1.-.-);cDNA FLJ55041, highly similar to 2-hydroxyphytanoyl-CoA lyase (EC 4.1.-.-);cDNA FLJ54118, highly similar to 2-hydroxyphytanoyl-CoA lyase (EC 4.1.-.-);cDNA FLJ32415 …	IPI00296535;IPI00909416;IPI00909144;IPI00925802;IPI00793954;IPI00924905;IPI00910264;IPI00924738;IPI00797564;IPI00925830;IPI00385479	IPI00296535;IPI00909416;IPI00909144;IPI00925802;IPI00793954;IPI00924905	HACL1;HPCL;HPCL2;HSPC279;PHYH2;hCG_1811148	Q9UJ83;B4DWI1;B4DXR1;B4DRJ1;B4DXI5;B3KPX4;C9J306	0.0212346	+	-2.40442	-1.76268	-2.45791	-2.99266	0.188885	0.0860804	0.2947	0.18201	0.125638	8	7	2	63.728	578	15.9	13	5	128.43	124	166.05	102.53	129.1	80.853	41.043	67.643	40.311	187.88	202.05	3.7461	27641000	18508000	27007000	25170000	39778000	14029000	1081800	3706600	2486000
2-hydroxyacylsphingosine 1-beta-galactosyltransferase;Ceramide UDP-galactosyltransferase;Cerebroside synthase;UDP-galactose-ceramide galactosyltransferase;cDNA FLJ52624, highly similar to 2-hydroxyacylsphingosine1-beta-galactosyltransferase (EC 2.4.1.45)	IPI00294455	IPI00294455	CGT;UGT4;UGT8	Q16880;B4DG70	0.0570877		-1.09815	-1.62897	-0.952483	-0.712992	0.467116	0.146251	0.32332	0.516742	0.610054	3	4	1	61.455	541	5	7.8	1.7	164.65	103.5	123.55	13.348	130.12	142.7	56.968	122.1	51.747				248600	907350	142940	12389000	12092000	2444900	41718	3916900	241850
2-methyl branched chain acyl-CoA dehydrogenase;2-methylbutyryl-coenzyme A dehydrogenase;Short/branched chain specific acyl-CoA dehydrogenase, mitochondrial;cDNA FLJ57418, highly similar to Short/branched chain specific acyl-CoAdehydrogenase, mitochondrial (EC 1.3.99.-);Acyl-Coenzyme A dehydrogenase, short/branched chain;cDNA, FLJ94986, Homo sapiens acyl-Coenzyme A dehydrogenase, short/branched ch…	IPI00024623;IPI00514033	IPI00024623	ACADSB;hCG_1781685;RP11-162A23.1-001	P45954;B4DQ51;Q5SQN6	0.0436613	+	1.72254	0.984042	2.17325	2.01031	3.30016	1.34477	1.978	4.5104	4.02868	2	6	4	47.485	432	7.2	18.8	15.5	97.54	98.752	72.408	34.001	27.035	6.0651	147.29	114.23	30.649	175.68	134.95	36.256	347150	1834300	1988200	18584000	16457000	51032000	4136800	4779700	3861000
2-oxoglutarate dehydrogenase complex component E1-like;2-oxoglutarate dehydrogenase-like, mitochondrial;Alpha-ketoglutarate dehydrogenase-like;cDNA FLJ55334, highly similar to Homo sapiens oxoglutarate dehydrogenase-like (OGDHL), mRNA;cDNA FLJ61528, highly similar to Homo sapiens oxoglutarate dehydrogenase-like (OGDHL), mRNA	IPI00643720;IPI00921408;IPI00921283	IPI00643720;IPI00921408;IPI00921283	KIAA1290;OGDHL	Q9ULD0;B4DKG2;B4E193	0.745973		-0.10929	0.14991	-0.368489		0.927044	0.236815	1.1095	0.774593		7	5	2	114.48	1010	3.9	5.6	1.8	91.012	60.203	101.5										49365	539830	558440	395180	4883300	7266900	0	0	0
2-oxoglutarate dehydrogenase complex component E2;Dihydrolipoamide succinyltransferase component of 2-oxoglutarate dehydrogenase complex;Dihydrolipoyllysine-residue succinyltransferase component of 2-oxoglutarate dehydrogenase complex, mitochondrial;E2K;cDNA, FLJ79362, moderately similar to Dihydrolipoyllysine-residue succinyltransferase component of 2- oxoglutarate dehydrogenase complex, mitocho…	IPI00420108;IPI00384122;IPI00033034;IPI00384016;IPI00954003	IPI00420108;IPI00384122;IPI00033034	DLST;DLTS;hCG_22359;DLSTP;E2k	P36957;B7ZAZ8;Q6IBS5;B7Z5W8;Q86TQ8;Q86TW7;Q16187	0.489861		-0.148126	0.13829	-0.112367	-0.470303	0.902422	0.189562	1.1006	0.925069	0.721813	23	16	11	48.729	453	38.6	25.6	19.6	109.31	122.57	69.542	114.84	120.3	25.007	55.89	108.07	84.273	120.27	127.79	30.63	33163000	234170000	102670000	42060000	192570000	215780000	33176000	242670000	226720000
2-oxoisovalerate dehydrogenase subunit alpha, mitochondrial;Branched-chain alpha-keto acid dehydrogenase E1 component alpha chain;cDNA, FLJ93812, highly similar to Homo sapiens branched chain keto acid dehydrogenase E1, alphapolypeptide (maple syrup urine disease) (BCKDHA), mRNA;cDNA FLJ55733, highly similar to 2-oxoisovalerate dehydrogenase alpha subunit, mitochondrial (EC 1.2.4.4);Branched chai…	IPI00025100;IPI00910865;IPI00944561;IPI00444329;IPI00470386	IPI00025100;IPI00910865;IPI00944561;IPI00444329	BCKDHA	P12694;B2R8A9;B4DP47;Q59EI3;Q9UMB3;Q6ZSA3	0.403272		0.286006	-0.0770721	0.116817	0.818274	1.21926	0.436714	0.94798	1.08434	1.7633	6	1	2	50.47	445	18	3.6	6.7	172.42	128.9	96.477	183.58	86.416	156.58				50.093	45.425	4.6672	15968000	6428900	7908200	196120	1398800	240640	390590	615010	642790
2-phospho-D-glycerate hydro-lyase;Alpha-enolase;C-myc promoter-binding protein;Enolase 1;MBP-1;MPB-1;Non-neural enolase;Phosphopyruvate hydratase;Plasminogen-binding protein;Enolase	IPI00465248;IPI00759806	IPI00465248;IPI00759806	ENO1;ENO1L1;MBPB1;MPB1	P06733-1;P06733;A4QMW8;A4UCS8;Q96GV1;Q9BT62;P06733-2	0.919796		0.0450124	-0.215245	-0.471864	0.822146	1.03169	0.568316	0.8614	0.721033	1.76803	59	49	55	47.168	434	93.1	92.2	88.9	119.83	121.96	67.075	109.79	85.94	49	68.025	99.264	102.34	209.18	178.89	42.608	326450000	2312000000	626890000	260930000	1709300000	2186300000	279580000	3146500000	1681400000
2-phospho-D-glycerate hydro-lyase;Beta-enolase;Enolase 3;Muscle-specific enolase;Skeletal muscle enolase;Enolase	IPI00218474;IPI00909949;IPI00942494;IPI00909595	IPI00218474;IPI00909949;IPI00942494	ENO3	P13929-1;P13929;P13929-2;Q9NPL4;P13929-3	0.018356	+	4.0283	5.07711	3.8102	3.1976	16.317	13.0199	33.757	14.0276	9.17431	10	19	24	46.931	434	26.5	53.7	65.2	151.68	169.38	248.64	66.972	81.044	5.5539	97.061	93.536	86.654	182.88	168.12	107.29	1423200	2721500	1844100	41885000	52233000	35071000	112860000	60342000	30313000
2-phospho-D-glycerate hydro-lyase;Enolase 2;Gamma-enolase;Neural enolase;Neuron-specific enolase;Enolase	IPI00216171;IPI00791564;IPI00792715;IPI00790892	IPI00216171;IPI00791564;IPI00792715	ENO2;hCG_25937	P09104;A8K3B0;Q6FHV6;B7Z2X9	0.40485		0.608421	1.61311	-0.399226	0.611381	1.52459	1.17125	3.0591	0.758265	1.52772	17	15	12	47.268	434	44.7	42.2	30.6	145.95	143.68	150.94	183.48	181.5	26.173	142.98	100.43	58.72	137.2	138.18	62.072	250580000	145480000	105690000	72457000	107440000	73567000	13577000	32239000	34370000
3(2),5-bisphosphate nucleotidase 1;Bisphosphate 3-nucleotidase 1;PAP-inositol-1,4-phosphatase;cDNA FLJ52203, highly similar to 3(2),5-bisphosphate nucleotidase 1 (EC 3.1.3.7);cDNA, FLJ78861, highly similar to 3(2),5-bisphosphate nucleotidase 1 (EC 3.1.3.7);cDNA FLJ52417, highly similar to 3(2),5-bisphosphate nucleotidase 1 (EC 3.1.3.7);Putative uncharacterized protein BPNT1	IPI00410214;IPI00910437;IPI00410215;IPI00953320	IPI00410214;IPI00910437;IPI00410215;IPI00953320	BPNT1	O95861-1;O95861;B4DPS5;B7Z9J7;B4DUS9;O95861-2;A6NF51;C9JI50	0.00145042	+	2.58765	2.44504	2.54086	2.77705	6.01118	0.729933	5.4454	5.81937	6.85448	2	8	6	33.392	308	8.4	32.1	29.2	125.32	136.55	204.24	64.514	74.256	9.6203	72.421	68.699	23.688	90.728	180.18	128.89	226960	1690900	4308900	9186400	60936000	30418000	1352100	4673700	3953900
3,2-trans-enoyl-CoA isomerase, mitochondrial;Delta(3),Delta(2)-enoyl-CoA isomerase;Dodecenoyl-CoA isomerase;DCI protein;Dodecenoyl-Coenzyme A delta isomerase (3,2 trans-enoyl-Coenzyme A isomerase), isoform CRA_a	IPI00300567;IPI00398758;IPI00383752	IPI00300567;IPI00398758	DCI;hCG_41028	P42126-1;P42126;Q96DC0;P42126-2	0.181733		0.511782		0.361583	0.661981	1.42581	0.210307		1.28484	1.58225	0	4	5	32.816	302	0	22.2	16.9	120.17	102.64	30.523				31.091	20.136	19.407	172.62	101.93	22.716	0	0	0	63189000	163000000	143610000	9045700	82044000	37941000
30 kDa prosomal protein;Macropain subunit C2;Multicatalytic endopeptidase complex subunit C2;Proteasome component C2;Proteasome nu chain;Proteasome subunit alpha type-1;Proteasome subunit alpha type	IPI00016832;IPI00472442;IPI00871889;IPI00910408;IPI00910833	IPI00016832;IPI00472442;IPI00871889;IPI00910408;IPI00910833	HC2;NU;PROS30;PSC2;PSMA1	P25786-1;P25786;P25786-2;A8MVJ4;Q53YE8;B4DEV8;B4E0X6	0.229039		0.691185	0.935988	-0.0976108	1.23518	1.61461	0.726538	1.9132	0.934579	2.3541	12	12	14	29.555	263	38.8	44.1	57.8	116.96	109.13	78.638	59.241	64.346	49.956	42.693	62.497	11.956	219.4	173.51	39.218	10503000	43045000	37812000	39005000	114310000	117710000	17623000	151020000	99365000
300 kDa mannose 6-phosphate receptor;Cation-independent mannose-6-phosphate receptor;Insulin-like growth factor 2 receptor;Insulin-like growth factor II receptor;M6P/IGF2 receptor;Insulin-like growth factor type 2 receptor;Insulin-like growth factor type II receptor;cDNA FLJ61170, highly similar to Cation-independent mannose-6-phosphate receptor;Insulin-like growth factor 2 receptor variant	IPI00289819;IPI00903213;IPI00930184;IPI00930044	IPI00289819;IPI00903213	IGF2R;MPRI;igf2R	P11717;A0N9R6;A0N9R7;B4DUY7;Q59EZ3	0.316122		-0.339976	0.0336521	-0.222434	-0.831148	0.790054	0.233724	1.0236	0.857118	0.562082	30	26	4	274.27	2491	15.4	13.1	1.8	98.287	100.69	40.817	88.362	127.92	45.252	61.663	62.121	31.908	110.86	48.862	44.18	6592700	23495000	29981000	10345000	62655000	63210000	15661000	34120000	79120000
300 kDa nuclear matrix antigen;Serine/arginine repetitive matrix protein 2;Serine/arginine-rich splicing factor-related nuclear matrix protein of 300 kDa;Splicing coactivator subunit SRm300;Tax-responsive enhancer element-binding protein 803;SRRM2 protein;KIAA0324;RNA binding protein	IPI00782992;IPI00785023;IPI00784560;IPI00552575;REV__IPI00797596	IPI00782992;IPI00785023	HSPC075;KIAA0324;SRL300;SRM300;SRRM2	Q9UQ35-1;Q9UQ35;A0AUK8;O60382;Q9UQ35-2;Q05BI2;Q05CV9;Q9UQ39	0.512533		0.557525	-0.838822	1.43885	1.07254	1.47174	1.10939	0.5591	2.71106	2.10314	48	19	9	299.61	2752	23.3	10.2	4.9	117.08	126.03	94.502	105.54	109.21	74.178	95.322	102.57	147.8	203.28	100.69	111.31	37365000	43079000	68801000	7101300	12499000	21838000	24078000	22762000	64324000
32 kDa accessory protein;Vacuolar proton pump subunit d 1;V-ATPase 40 kDa accessory protein;V-ATPase AC39 subunit;V-type proton ATPase subunit d 1;cDNA, FLJ93507, highly similar to Homo sapiens ATPase, H+ transporting, lysosomal 38kDa, V0 subunit d isoform 1 (ATP6V0D1), mRNA;cDNA FLJ59090, highly similar to Vacuolar ATP synthase subunit d (EC 3.6.3.14);ATPase H+ transporting V0 subunit D1;cDNA FL…	IPI00034159;IPI00922223;IPI00167639	IPI00034159;IPI00922223	ATP6D;ATP6V0D1;VPATPD	P61421;B2R7M1;B7Z788;C6SUN6;B7Z6L9	0.0256415	+	1.23666	1.58101	1.24722	0.881747	2.35652	0.575143	2.9918	2.37383	1.8426	8	10	3	40.329	351	19.7	29.9	11.1	100.28	81.283	76.793	36.947	38.833	22.716	161.43	108.15	33.448	204.77	173.43	17.756	1458800	16940000	10642000	10164000	44383000	30489000	1501400	2513600	4258200
33 kDa VAMP-associated protein;Vesicle-associated membrane protein-associated protein A;cDNA FLJ78586, highly similar to Homo sapiens VAMP (vesicle-associated membrane protein)-associated protein A, 33kDa (VAPA), mRNA;cDNA, FLJ96653, Homo sapiens VAMP (vesicle-associated membrane protein)-associated protein A, 33kDa (VAPA), mRNA	IPI00170692;IPI00640416;IPI00929577;IPI00642826	IPI00170692;IPI00640416	VAP33;VAPA	Q9P0L0;A8KA83	0.644692		-0.218387	-0.209329	-0.926531	0.4807	0.859526	0.438156	0.86494	0.526122	1.39542	4	5	4	27.893	249	20.5	17.7	25.7	133.4	134.81	30.618	142.53	51.358	32.26	39.801	75.997	23.275	307.83	210.88	50.426	5899900	1181400	2595500	6765300	31113000	5324300	1441000	1420800	3952000
34 kDa nucleolar scleroderma antigen;rRNA 2-O-methyltransferase fibrillarin;cDNA FLJ56738, highly similar to Fibrillarin;FBL protein;Putative uncharacterized protein	IPI00025039	IPI00025039	FBL;FIB1;FLRN	P22087;B4DLD4;Q96BS4	0.0180988	+	-1.07918	-1.31463	-1.1145	-0.808426	0.473296	0.085679	0.40203	0.461851	0.571004	9	10	6	33.784	321	27.7	33.6	21.8	112.3	120.35	105.89	160.35	111.68	70.06	77.494	75.317	86.969	89.155	181.65	26.187	5778800	9923600	4390900	22560000	122180000	114950000	47604000	46813000	33785000
35 kDa lectin;Carbohydrate-binding protein 35;Galactose-specific lectin 3;Galactoside-binding protein;Galectin-3;IgE-binding protein;L-31;Laminin-binding protein;Lectin L-29;Mac-2 antigen;LGALS3 protein variant;LGALS3 protein;Lectin, galactoside-binding, soluble, 3;Full-length cDNA clone CS0DI041YE05 of Placenta of Homo sapiens (human);Galectin 3	IPI00465431	IPI00465431	LGALS3;MAC2	P17931;Q59FR8;Q6FGL0;Q6IBA7;Q6NVH9;Q86TY5;Q8IXB9	0.608209		-0.358125		-0.864652	0.148401	0.780178	0.395387		0.549179	1.10834	0	2	1	26.152	250	0	7.2	6	69.018	65.597	78.505				2.4778	11.569	12.203				0	0	0	873610	1927900	3679600	152530	259380	161030
35 kDa nucleoporin;Mitotic phosphoprotein 44;Nuclear pore complex protein Nup53;Nucleoporin Nup35;Nucleoporin NUP53;cDNA FLJ76613, highly similar to Homo sapiens nucleoporin 35kDa (NUP35), transcript variant 1, mRNA;cDNA FLJ60753, highly similar to Nucleoporin NUP53;cDNA FLJ57668, highly similar to Nucleoporin NUP53	IPI00329650;IPI00916892;IPI00550291;IPI00927491;IPI00927087;IPI00927316;IPI00927742	IPI00329650;IPI00916892	MP44;NUP35;NUP53	Q8NFH5;A8K3Z5;B4DP57;B4DYB4	0.00888612	+	-1.46329	-1.37786	-1.73487	-1.27715	0.362664	0.0584131	0.38479	0.300436	0.412609	9	4	3	34.773	326	40.5	19.6	20.6	110.98	89.962	102.5	51.14	50.579	18.578	134.6	169.04	48.936	307.91	73.774	59.586	10615000	24610000	13229000	46654000	25275000	9495600	2458000	13819000	15990000
3-5 RNA exonuclease OLD35;PNPase old-35;Polynucleotide phosphorylase 1;Polynucleotide phosphorylase-like protein;Polyribonucleotide nucleotidyltransferase 1, mitochondrial	IPI00744711;IPI00894110;IPI00892520;IPI00893252;IPI00892880;IPI00892680	IPI00744711;IPI00894110	PNPASE;PNPT1	Q8TCS8;C9J7G3	0.0124087	+	-1.31729	-1.02107	-1.46879	-1.462	0.401289	0.0754141	0.49275	0.361285	0.36299	12	12	4	85.95	783	13.9	17.6	3.3	144.74	131.01	127.29	102.73	68.372	38.619	104.32	112.98	28.333	141.28	196.95	96.919	13208000	22649000	11126000	14971000	54638000	46912000	1673900	6582300	790750
358 kDa nucleoporin;E3 SUMO-protein ligase RanBP2;Nuclear pore complex protein Nup358;Nucleoporin Nup358;p270;Ran-binding protein 2;Ran binding protein;Transformation-related protein 2;Transformation-related protein 1	IPI00221325;IPI00915960;IPI00916646;IPI00942933;IPI00874205;IPI00941935;IPI00917371;IPI00888992;IPI00926400;IPI00943097;IPI00879540;IPI00917621;IPI00916003;IPI00917503;IPI00917309;IPI00940055;IPI00916803;IPI00015864;IPI00645512;IPI00889145;IPI00943294;IPI00479931;IPI00019072;IPI00936494;IPI00414084;IPI00642530;IPI00877005;IPI00942564;IPI00936247;IPI00007346;IPI00643915;IPI00917465;IPI00926449;IPI…	IPI00221325;IPI00915960;IPI00916646	NUP358;RANBP2	P49792;Q13073;Q5JC45;Q5JC46;C9K0H5	0.0648583		-1.17553	-0.673532	-1.75591	-1.09714	0.442722	0.165477	0.62697	0.296086	0.467443	55	28	3	358.2	3224	24	12.7	1.1	135.75	106.78	104.85	111.87	113.28	63.803	100.36	75.314	79.818	78.551	58.018	76.21	55397000	59230000	52372000	35097000	79284000	41709000	1966000	6210200	11254000
35-alpha calcimedin;Annexin A3;Annexin III;Annexin-3;Inositol 1,2-cyclic phosphate 2-phosphohydrolase;Lipocortin III;Placental anticoagulant protein III	IPI00024095;IPI00745868	IPI00024095;IPI00745868	ANX3;ANXA3	P12429;A6NLK4	0.184906		1.82184	3.63436	1.14168	0.689474	3.53532	6.07432	12.418	2.20639	1.6127	11	14	7	36.375	323	31.3	42.1	25.7	127.97	160.72	139.97	177.14	68.915	42.008	139.72	149.45	52.464	197.23	169.96	66.255	5877400	34415000	35756000	616820000	51476000	59177000	3970000	8047000	16145000
37 kDa laminin receptor precursor;37/67 kDa laminin receptor;40S ribosomal protein SA;67 kDa laminin receptor;Colon carcinoma laminin-binding protein;Laminin receptor 1;Laminin-binding protein precursor p40;Multidrug resistance-associated protein MGr1-Ag;NEM/1CHD4;Putative uncharacterized protein RPSA;Putative uncharacterized protein ENSP00000346598;HCG1984468, isoform CRA_b;Putative uncharacteri…	IPI00553164;IPI00927101;IPI00413108;IPI00847766;IPI00793137;IPI00793905;IPI00942587;IPI00946437;IPI00797642;IPI00871515;IPI00399077	IPI00553164;IPI00927101;IPI00413108;IPI00847766;IPI00793137;IPI00793905;IPI00942587	LAMBR;LAMR1;RPSA;hCG_1984468	P08865;C9J9K3;A6NE09;C9JKH4	0.814647		0.0322609	-0.191277	0.0640123	0.224048	1.02261	0.146714	0.87583	1.04537	1.16801	19	17	15	32.854	295	61.4	61	58.3	111.95	112.97	51.588	65.084	66.581	33.87	71.948	85.903	57.697	196.37	148.76	35.252	52736000	395690000	115470000	131210000	435650000	608690000	28689000	287920000	238300000
38 kDa DNA polymerase delta interaction protein;Polymerase delta-interacting protein 2;cDNA FLJ52257, highly similar to Polymerase delta-interacting protein 2;Putative uncharacterized protein DKFZp586F1524	IPI00165506;IPI00944993	IPI00165506	HSPC017;PDIP38;POLD4;POLDIP2;DKFZp586F1524	Q9Y2S7;B4DEM9;Q9UG21	0.557875		-0.358522	-0.372729	-1.24215	0.53931	0.779963	0.524071	0.77232	0.422744	1.45328	7	3	1	42.033	368	24.2	10.1	4.1	152.56	116.66	81.202	91.6	76.477	21.56	272.7	294.21	13.244				9093100	6709900	9212600	257200000	21594000	3122000	809300	306120	1549500
38 kDa FK506-binding protein;FK506-binding protein 8;FKBPR38;Peptidyl-prolyl cis-trans isomerase FKBP8;Rotamase;cDNA, FLJ93891, Homo sapiens FK506 binding protein 8, 38kDa (FKBP8), mRNA;cDNA FLJ56370, highly similar to Homo sapiens FK506 binding protein 8, 38kDa (FKBP8), mRNA;FKBP8 isoform 1	IPI00640341;IPI00328161;IPI00947340	IPI00640341;IPI00328161;IPI00947340	FKBP38;FKBP8	Q14318-1;Q14318;Q14318-2;B2R8G6;B7Z6M0;C8C9T5	0.0275296	+	-1.45801	-1.03611	-1.89165	-1.44626	0.363996	0.109276	0.48764	0.269498	0.366972	12	10	7	44.561	412	34.7	31.6	16.3	130.65	117.17	95.85	156.4	124.15	59.725	110.85	123.4	68.992	103.57	64.813	38.425	22417000	34697000	22428000	13339000	54822000	56990000	9988900	63074000	29660000
38 kDa nuclear protein containing a WW domain;Polyglutamine tract-binding protein 1;Polyglutamine-binding protein 1;Putative uncharacterized protein PQBP1	IPI00024698;IPI00654698;IPI00954553;IPI00030216;IPI00644888;IPI00607824;IPI00386483;IPI00641377;IPI00607805;IPI00386509;IPI00607789;IPI00654565	IPI00024698;IPI00654698;IPI00954553;IPI00030216;IPI00644888;IPI00607824;IPI00386483	JM26;NPW38;PQBP1	O60828-1;O60828;O60828-2;O60828-3;O60828-6;C9JQA1;O60828-5;O60828-4	0.634811		0.200453	0.285935	-0.463727	0.77915	1.14906	0.495505	1.2192	0.725111	1.71612	3	4	3	30.472	265	20.8	28.7	17.4	132.76	140.04	49.598	52.679	119.86	17.134	59.052	74.551	54.67	203.8	199.12	69.242	369940	2051000	3423700	4956600	30637000	18123000	9513400	31007000	16308000
38 kDa-splicing factor;Prp8-binding protein;U5 small nuclear ribonucleoprotein 40 kDa protein;U5 snRNP-specific 40 kDa protein;WD repeat-containing protein 57;cDNA FLJ90035 fis, clone HEMBA1001878, highly similar to WD repeat protein 57;CDW11/WDR57;WD repeat domain 57 (U5 snRNP specific), isoform CRA_a;cDNA, FLJ94417, highly similar to Homo sapiens WD repeat domain 57 (U5 snRNP specific) (WDR57),…	IPI00940685;IPI00006723;IPI00385642	IPI00940685;IPI00006723	PRP8BP;SFP38;SNRNP40;WDR57;hCG_20041	Q96DI7;A0MNP2;B2R9I9;B4DQJ1	0.568331		0.146837	-0.187395	0.553617	0.0742891	1.10714	0.302835	0.87819	1.46776	1.05284	4	1	3	39.31	357	15.4	3.4	9.5	125.82	116.45	49.675	72.543	74.924	46.733	50.728	51.174	0.44614	79.481	123.94	29.218	1158700	3084800	2165900	41196	14275000	9933700	632980	29282000	5552100
39 kDa phosphoribosypyrophosphate synthase-associated protein;Phosphoribosyl pyrophosphate synthase-associated protein 1;cDNA FLJ57408, highly similar to Phosphoribosyl pyrophosphatesynthetase-associated protein 1;Putative uncharacterized protein PRPSAP1	IPI00797603;IPI00291578;IPI00924809;IPI00925025;IPI00925704;IPI00925457;IPI00925241	IPI00797603;IPI00291578;IPI00924809;IPI00925025	PRPSAP1	Q14558;B2R6M4;B4DP31;C9J168	0.256203		0.403197	0.574828	0.231566		1.32244	0.223015	1.4895	1.17411		4	3	1	42.467	385	13	10.4	3.6	64.437	113.03	106.67	38.904	44.381	3.6586	11.057	26.995	19.91				1264000	1099200	2791000	2540200	7192400	5009800	0	0	0
39S ribosomal protein L1, mitochondrial;MRPL1 protein	IPI00549381	IPI00549381	BM-022;MRPL1	Q9BYD6;A0PJ79	0.324041		-0.737293	-0.325847	-1.14874		0.599864	0.245232	0.79783	0.451019		3	6	0	36.908	325	12	25.8	0	111.15	80.966	93.716	132.24	35.025	49.182	34.495	64.033	24.837				489870	1064700	1409600	8710800	30850000	38015000	0	0	0
39S ribosomal protein L15, mitochondrial;39S ribosomal protein L19, mitochondrial;cDNA FLJ76832, highly similar to Homo sapiens mitochondrial ribosomal protein L19 (MRPL19), mRNA;cDNA FLJ57115, highly similar to 39S ribosomal protein L19, mitochondrial	IPI00027096;IPI00874009	IPI00027096	KIAA0104;MRPL15;MRPL19	P49406;A8K5D5;B4DIG4	0.0325326	+	-0.762451	-0.497465	-0.811471	-0.978415	0.589494	0.102793	0.70835	0.569801	0.507537	2	4	1	33.535	292	6.2	14.4	3.1	126	113.91	86.113	132.5	117.03	31.151	19.124	46.646	9.3418	19.376	6.5797	12.796	55851	912280	133220	5349900	42109000	10063000	4914400	8380600	9102000
39S ribosomal protein L15, mitochondrial;cDNA, FLJ93269, highly similar to Homo sapiens mitochondrial ribosomal protein L15 (MRPL15), nuclear gene encoding mitochondrial protein, mRNA	IPI00023086;REV__IPI00374748;REV__IPI00479701;IPI00914066	IPI00023086	HSPC145;MRPL15	Q9P015;B2R739	0.0801664		-0.703358	-0.695746	-1.07451	-0.339822	0.614141	0.157893	0.61739	0.474834	0.790139	6	7	4	33.419	296	16.2	27	17.2	136.85	119.61	106.21	90.563	61.863	36.325	72.354	91.295	20.458	211.59	127.03	22.534	959780	15562000	2023700	40350000	98438000	124500000	5073600	9674100	12372000
39S ribosomal protein L2, mitochondrial;39S ribosomal protein L37, mitochondrial;Mitochondrial ribosomal protein L37	IPI00162330;IPI00335130;IPI00395764	IPI00162330;IPI00335130	HSPC235;MRPL2;MRPL37;RPML2;RP5-997D24.1-003	Q9BZE1;Q5T858	0.0261395	+	-0.640358	-0.61405	-0.666666		0.641554	0.0165456	0.65336	0.629961		3	8	1	48.117	423	9.2	24.1	2.4	125.26	90.335	99.909	52.252	13.521	40.331	54.167	61.818	17.255				565380	1457400	1493000	7027700	23103000	5820200	0	0	0
39S ribosomal protein L28, mitochondrial;Melanoma antigen p15;Melanoma-associated antigen recognized by T lymphocytes;MRPL28 protein;Mitochondrial ribosomal protein L28	IPI00172594;IPI00719120;IPI00852855;IPI00658191;IPI00852785;IPI00795147	IPI00172594;IPI00719120;IPI00852855;IPI00658191;IPI00852785;IPI00795147	MAAT1;MRPL28;Z97634.1-001;Z97634.1-010;Z97634.1-009;Z97634.1-011	Q13084;Q6FHK1;Q4TT38;A2IDC6;Q4TT37;A2IDC7	0.166818		-0.914845		-1.16021	-0.66948	0.530401	0.128188		0.447447	0.628733	0	4	2	30.156	256	0	20.7	13.7	163.35	139.09	87.508				118.44	140.04	8.2665	15.3	24.426	19.505	0	0	0	2847500	17542000	13790000	398060	3717800	3803100
39S ribosomal protein L38, mitochondrial;cDNA, FLJ93795, Homo sapiens mitochondrial ribosomal protein L38 (MRPL38), nucleargene encoding mitochondrial protein, mRNA;Mitochondrial ribosomal protein L38, isoform CRA_b;cDNA FLJ13996 fis, clone Y79AA1002211, highly similar to Homo sapiens mitochondrial ribosomal protein L38 (MRPL38), nuclear gene encoding mitochondrial protein, mRNA	IPI00783656;IPI00915896;IPI00917173	IPI00783656;IPI00915896	HSPC262;MRPL38;hCG_1776092	Q96DV4;B2R894;B3KN96	0.0226358	+	-0.571694	-0.634061	-0.682124	-0.398898	0.672826	0.0727277	0.64436	0.623247	0.758438	5	9	1	44.596	380	16.6	20.8	3.4	124.47	103.54	97.577	131.52	136.98	27.972	123.76	61.968	12.221				14365000	3936500	5121100	5499300	27496000	6873300	714070	888990	780980
39S ribosomal protein L39, mitochondrial;39S ribosomal protein L5, mitochondrial;Putative uncharacterized protein MRPL39	IPI00295427;IPI00084571;IPI00794240	IPI00295427;IPI00084571;IPI00794240	C21orf92;MRPL39;MRPL5;MSTP003;PRED22;RPML5	Q9NYK5-1;Q9NYK5;Q9NYK5-2;C9JYA5;C9JG87	0.0750731		-0.738872	-0.618252	-1.15614	-0.442227	0.599208	0.14764	0.65146	0.448712	0.735998	6	6	4	38.721	338	19.2	18	16	139.74	104.77	101.53	43.305	44.86	88.597	36.091	58.217	11.89	286.16	47.922	32.512	2153000	7987500	4218800	7808200	44536000	59065000	2148700	12042000	6748000
39S ribosomal protein L4, mitochondrial	IPI00023334;IPI00107137	IPI00023334;IPI00107137	CDABP0091;CGI-28;MRPL4	Q9BYD3-1;Q9BYD3;Q9BYD3-2	0.0664664		-0.890296	-0.407306	-1.11257	-1.15101	0.539504	0.17195	0.75403	0.462471	0.450308	2	5	1	34.919	311	10	17.7	6.1	129.62	121.5	106.61	32.032	60.087	49.68	88.832	115.42	14.94	4.0005	42.226	38.225	1287000	4116300	4466000	6513000	28929000	11973000	283900	4521500	1200200
39S ribosomal protein L44, mitochondrial	IPI00009680	IPI00009680	MRPL44	Q9H9J2	0.900461		-0.0826078	0.881508	-1.1354	0.00607208	0.944349	0.698548	1.8423	0.455208	1.00422	3	5	1	37.535	332	8.4	19.6	3.3	143.95	101.85	108.85	30.309	84.346	31.069	54.758	49.416	26.476	82.871	58.648	26.047	51589	123510	60742	14037000	44873000	10675000	956590	2779300	2142000
39S ribosomal protein L46, mitochondrial;P2ECSL;FLJ00124 protein	IPI00023161;IPI00797533;IPI00798240;IPI00383092;IPI00796428;IPI00795938;IPI00797042	IPI00023161;IPI00797533;IPI00798240;IPI00383092;IPI00796428	C15orf4;LIECG2;MRPL46;FLJ00124	Q9H2W6;Q8TER9	0.660915		-0.355991		-0.959918	0.247937	0.781333	0.476181		0.514086	1.18751	0	3	2	31.705	279	0	15.4	9.3	177.72	156.49	77.109				83.741	84.449	12.105	136.73	140.96	4.3575	0	0	0	7741800	30718000	7402700	198450	7272300	7998000
3-alkyladenine DNA glycosylase;3-methyladenine DNA glycosidase;ADPG;DNA-3-methyladenine glycosylase;N-methylpurine-DNA glycosylase;N-methylpurine-DNA glycosylase, isoform CRA_c;Proliferation-inducing protein 11;Proliferation-inducing protein 16	IPI00295497;IPI00748491;IPI00556107;IPI00218495	IPI00295497;IPI00748491;IPI00556107;IPI00218495	AAG;ANPG;MID1;MPG;hCG_22412;PIG16;Z69720.1-002;Z69720.1-004	P29372-1;P29372;Q1W6H1;Q5J9I4;A2IDA3;P29372-2	0.524712		-0.395348	-0.663351	-1.1271	0.604411	0.760306	0.569987	0.63141	0.457834	1.52036	7	3	4	32.868	298	32.9	14.8	25.5	145.88	90.258	58.648	102.06	111	76.364	101.53	150.07	31.647	57.374	21.56	35.882	888480	2001100	3175000	16921000	10231000	2899400	927800	1228200	3763800
3D3/LYRIC;Astrocyte elevated gene-1 protein;Lysine-rich CEACAM1 co-isolated protein;Metadherin;Metastasis adhesion protein;Protein LYRIC	IPI00328715	IPI00328715	AEG1;LYRIC;MTDH	Q86UE4	0.330718		0.766813	-0.282877	0.781132	1.80218	1.70151	1.35635	0.82195	1.71848	3.48748	5	2	10	63.836	582	14.6	5	25.1	118.37	124.37	75.445	46.014	60.653	29.169	1.9053	148.29	95.766	217.99	129.58	108.05	4598500	8677800	6376800	1372900	1876000	5980500	4544900	3066600	4821600
3-hydroxy-3-methylglutarate-CoA lyase;Hydroxymethylglutaryl-CoA lyase, mitochondrial;3-hydroxymethyl-3-methylglutaryl-Coenzyme A lyase;3-hydroxymethyl-3-methylglutaryl-Coenzyme A lyase (Hydroxymethylglutaricaciduria), isoform CRA_b;cDNA FLJ16378 fis, clone TKIDN2016399, highly similar to Hydroxymethylglutaryl-CoA lyase, mitochondrial (EC 4.1.3.4);3-hydroxymethyl-3-methylglutaryl-Coenzyme A lyase …	IPI00293564;IPI00908707;IPI00514742;IPI00477259;IPI00794213;IPI00871292;IPI00922767;IPI00922227;IPI00017610	IPI00293564;IPI00908707	HMGCL;hCG_37683;RP5-886K2.8-001	P35914;B1AK13;Q6IBC0;B4DUP4;B7UCC6	0.615172		-0.287604	-0.787393	-0.763242	0.687823	0.819262	0.592711	0.57939	0.589171	1.61085	2	1	1	34.36	325	6.8	4.6	2.2	79.782	84.014	43.986	33.87	21.912	71.923							287820	873790	911790	1029900	4644000	773550	9585600	1326300	3670900
3-hydroxy-3-methylglutaryl coenzyme A synthase;Hydroxymethylglutaryl-CoA synthase, cytoplasmic;3-hydroxy-3-methylglutaryl-Coenzyme A synthase 1 (Soluble);cDNA FLJ38173 fis, clone FCBBF1000053, highly similar to HYDROXYMETHYLGLUTARYL-COA SYNTHASE, CYTOPLASMIC	IPI00008475	IPI00008475	HMGCS;HMGCS1	Q01581;Q5XJ04;Q8N995	0.94268		0.0131421	0.240253	-0.300182	0.0993553	1.00915	0.189488	1.1812	0.81215	1.07129	4	4	3	57.293	520	11.2	11.2	6	73.02	84.405	107.61	38.903	65.788	25.743	40.345	47.79	25.61	102.45	109.21	3.6768	3035400	5685200	9156800	11349000	25349000	12172000	843630	1234000	3549400
3-hydroxyacyl-CoA dehydrogenase;Enoyl-CoA hydratase/3,2-trans-enoyl-CoA isomerase;Peroxisomal bifunctional enzyme;EHHADH protein;cDNA FLJ50897, highly similar to Peroxisomal bifunctional enzyme	IPI00216164;IPI00927231;IPI00926990;IPI00797006	IPI00216164;IPI00927231	ECHD;EHHADH	Q08426;A0PJI6;B4DWG3	0.892488		-0.150935	-0.946193	-1.31788	1.81127	0.900666	1.76159	0.519	0.401123	3.50951	5	5	1	79.494	723	7.7	8.2	2.8	110.68	137.92	125.69	41.043	126.64	94.894	74.407	64.039	16.079				14449000	3054700	1033100	2987900	8227300	2528500	764170	100920	56643
3-hydroxybutyrate dehydrogenase type 2;Dehydrogenase/reductase SDR family member 6;Oxidoreductase UCPA;R-beta-hydroxybutyrate dehydrogenase;cDNA FLJ76235, highly similar to Homo sapiens dehydrogenase/reductase (SDR family) member 6 (DHRS6),mRNA;cDNA FLJ57796, highly similar to Dehydrogenase/reductase SDR family member 6 (EC 1.1.-.-);cDNA FLJ78346, highly similar to Homo sapiens 3-hydroxybutyrate …	IPI00607799;IPI00446769;IPI00398129	IPI00607799;IPI00446769;IPI00398129	BDH2;DHRS6;UNQ6308/PRO20933	Q9BUT1-1;Q9BUT1;A8K295;B4DUF6;Q9BUT1-2;A8K5M0;B3KY19	0.236259		2.06531		1.2616	2.86902	4.18524	3.47051		2.39762	7.30567	0	2	5	26.724	245	0	9.4	22.9	120.45	124.96	120.96				66.238	60.096	6.5237	210.03	174.52	26.682	0	0	0	1388400	1134300	4109300	2162000	4555700	2955000
3-hydroxyisobutyrate dehydrogenase, mitochondrial;3-hydroxyisobutyrate dehydrogenase;3-hydroxyisobutyrate dehydrogenase;3-hydroxyisobutyrate dehydrogenase, isoform CRA_a;cDNA, FLJ96784, Homo sapiens 3-hydroxyisobutyrate dehydrogenase (HIBADH), mRNA;NS5ATP1	IPI00013860;IPI00915850;IPI00879284	IPI00013860	HIBADH;hCG_39034;NS5ATP1;tcag7.211	P31937;Q546Z2	0.529763		-0.295208	-0.834956	-0.517225	0.466556	0.814955	0.439711	0.5606	0.698714	1.38181	7	8	4	35.329	336	28.6	32.1	17.3	71.781	78.999	46.597	62.656	120.82	56.548	58.747	63.848	13.789	166.37	160.47	25.876	979230	3454300	6067400	8843100	41047000	30298000	3226500	7409900	8001400
3-hydroxyisobutyrate dehydrogenase-like protein;Cytokine-like nuclear factor N-PAC;Glyoxylate reductase 1 homolog;Nuclear protein NP60;Nuclear protein of 60 kDa;Putative oxidoreductase GLYR1	IPI00000155;IPI00647648;IPI00647134;IPI00644210;IPI00910934	IPI00000155;IPI00647648;IPI00647134;IPI00644210;IPI00910934	GLYR1;HIBDL;NP60	Q49A26-1;Q49A26;Q49A26-2;Q49A26-3;Q49A26-4;Q49A26-5	0.132593		-1.40959	-1.30297	-2.44895	-0.476848	0.376418	0.26899	0.40529	0.183143	0.718546	3	2	1	60.556	553	6	2.9	2.9	116.32	130.59	149.32	106.09	131.22	114.32	57.29	27.927	37.651	179.69	154.12	25.573	2637000	4523600	1767500	297360	2376800	1959800	421580	2321100	1779800
3-hydroxyisobutyryl-CoA hydrolase, mitochondrial;3-hydroxyisobutyryl-coenzyme A hydrolase;Putative uncharacterized protein HIBCH	IPI00419802;IPI00377161;IPI00915760;IPI00871204;IPI00916098;IPI00916393;IPI00915922;IPI00916207;IPI00916939;IPI00916849	IPI00419802;IPI00377161;IPI00915760	HIBCH	Q6NVY1-1;Q6NVY1;Q6NVY1-2;B8ZZZ0	0.865628		0.106682	-0.426121	-0.4728	1.21897	1.07675	0.921174	0.74426	0.720565	2.3278	5	6	3	43.482	386	12.7	16.6	7.5	111.11	95.426	47.597	123.82	120.03	26.966	112.62	92.577	16.364	139.34	15.164	100.1	8032300	11336000	12468000	3238200	22595000	5962100	13880000	12345000	9426200
3-ketoacyl-CoA thiolase, mitochondrial;Acetyl-CoA acyltransferase;Beta-ketothiolase;Mitochondrial 3-oxoacyl-CoA thiolase;T1;cDNA, FLJ95265, highly similar to Homo sapiens acetyl-Coenzyme A acyltransferase 2 (mitochondrial 3-oxoacyl-Coenzyme A thiolase) (ACAA2), nuclear gene encoding mitochondrial protein, mRNA;cDNA FLJ30111 fis, clone BNGH42000360, highly similar to 3-ketoacyl-CoA thiolase, mitoc…	IPI00001539;IPI00873829	IPI00001539;IPI00873829	ACAA2	P42765;B2RB23;B3KNP8;A8MVT9	0.0176841	+	-0.189552	-0.162606	-0.24062	-0.16543	0.876878	0.0266618	0.89341	0.846382	0.891663	27	28	17	41.924	397	66.5	78.1	60.7	118.32	98.816	78.29	122.78	84.949	48.316	89.99	105.58	34.446	140.23	126.31	34.83	33689000	198150000	114850000	66337000	381170000	459750000	20278000	116240000	120120000
3-ketoacyl-CoA thiolase, peroxisomal;Acetyl-CoA acyltransferase;Beta-ketothiolase;Peroxisomal 3-oxoacyl-CoA thiolase;cDNA FLJ55549, highly similar to 3-ketoacyl-CoA thiolase, peroxisomal (EC 2.3.1.16);3-oxoacyl-CoA thiolase;Putative uncharacterized protein ACAA1;cDNA FLJ61196, highly similar to 3-ketoacyl-CoA thiolase, peroxisomal (EC 2.3.1.16);ACAA1 protein	IPI00012828;IPI00927496;IPI00926442;IPI00790196;IPI00303933;IPI00926669;IPI00796781;IPI00925964;IPI00011522;IPI00793428;IPI00924606;IPI00789589	IPI00012828;IPI00927496;IPI00926442;IPI00790196;IPI00303933	ACAA;ACAA1;PTHIO	P09110;B4DEN6;Q8NCW8;C9JDE9;C9J6A6;B4E072;Q96CA6	0.0206888	+	1.55909	1.1377	1.61976	1.91981	2.94668	0.793099	2.2003	3.07324	3.78372	3	9	9	44.292	424	12	32.3	26.9	96.634	92.001	82.513	34.664	28.244	14.21	73.341	72.975	14.864	144.16	163.71	30.431	1333400	6536200	10965000	23576000	134770000	87455000	5206000	52836000	24877000
3-ketoacyl-CoA thiolase;Acetyl-CoA acyltransferase;Beta-ketothiolase;TP-beta;Trifunctional enzyme subunit beta, mitochondrial;cDNA FLJ59448, highly similar to Trifunctional enzyme subunit beta, mitochondrial;cDNA FLJ55769, highly similar to Trifunctional enzyme subunit beta, mitochondrial;cDNA FLJ56214, highly similar to Trifunctional enzyme subunit beta, mitochondrial;Putative uncharacterized pr…	IPI00022793;IPI00893108;IPI00893995;IPI00893587;IPI00893867;IPI00383695	IPI00022793;IPI00893108	HADHB;MSTP029	P55084;B4DDC9;B4DY96;B4E2W0;B5MD38	0.0393172	+	0.613975	0.685536	0.369893	0.786497	1.53047	0.223845	1.6083	1.29226	1.72488	21	20	13	51.294	474	52.5	43.9	43.9	89.328	95.114	61.156	84.191	101.93	16.939	67.924	105.36	75.911	131.69	130.01	34.514	70547000	294270000	149170000	70105000	408720000	380370000	36695000	133840000	147060000
3-methylcrotonyl-CoA carboxylase 1;3-methylcrotonyl-CoA carboxylase biotin-containing subunit;3-methylcrotonyl-CoA:carbon dioxide ligase subunit alpha;Methylcrotonoyl-CoA carboxylase subunit alpha, mitochondrial;Putative uncharacterized protein DKFZp686B20267;cDNA FLJ54709, highly similar to Methylcrotonoyl-CoA carboxylase subunit alpha, mitochondrial (EC 6.4.1.4);cDNA FLJ53328, highly similar to…	IPI00024580;IPI00792499;IPI00945529;IPI00789136;IPI00945717	IPI00024580;IPI00792499;IPI00945529;IPI00789136	MCCA;MCCC1;DKFZp686B20267	Q96RQ3;Q68D27;B4DH16;B4DHW5;B7ZAW3	0.430674		0.222741	0.0439044	0.401578		1.16695	0.205097	1.0309	1.32095		2	3	0	80.472	725	4.1	4.6	0	85.641	75.059	39.423	8.0945	19.697	45.289	77.391	68.34	28.216				4180900	3356700	6772600	3270800	4016200	6079600	0	0	0
3-methylcrotonyl-CoA carboxylase 2;3-methylcrotonyl-CoA carboxylase non-biotin-containing subunit;3-methylcrotonyl-CoA:carbon dioxide ligase subunit beta;Methylcrotonoyl-CoA carboxylase beta chain, mitochondrial	IPI00784044;IPI00789428;IPI00903225;IPI00936407	IPI00784044;IPI00789428	MCCB;MCCC2	Q9HCC0-1;Q9HCC0;Q9HCC0-2	0.127065		-0.552231	-0.185392	-0.94043	-0.53087	0.681965	0.179227	0.87941	0.521078	0.692137	15	14	4	61.332	563	34.6	28.6	9.6	115.71	102.83	86.074	110.45	94.35	46.366	84.791	95.284	45.23	61.694	59.006	20.777	20534000	25572000	34802000	30832000	99403000	94224000	2970700	10827000	11420000
3-oxoacid-CoA transferase 1;Somatic-type succinyl-CoA:3-oxoacid-CoA-transferase;Succinyl-CoA:3-ketoacid-coenzyme A transferase 1, mitochondrial;Succinyl-CoA:3-ketoacid CoA transferase;cDNA, FLJ92639, highly similar to Homo sapiens 3-oxoacid CoA transferase (OXCT), nuclear geneencoding mitochondrial protein, mRNA;cDNA FLJ51924, highly similar to Succinyl-CoA:3-ketoacid-coenzyme A transferase1, mit…	IPI00026516;IPI00307395;IPI00739583	IPI00026516	OXCT;OXCT1;SCOT	P55809;A1E286;B2R5V2;B7Z528;B7Z609;Q6IAV5	0.285363		0.461199	0.602457	-0.148609	0.929748	1.37669	0.505771	1.5183	0.90212	1.90494	9	11	9	56.157	520	24.2	27.9	24.2	138.97	141.13	48.697	198.68	167.97	37.889	76.831	112.35	23.132	179.52	164.96	31.732	7618300	15079000	22741000	312750000	64188000	32316000	4293400	28082000	19895000
3-phosphoadenosine-5-phosphosulfate synthase;Adenosine-5-phosphosulfate 3-phosphotransferase;Adenylylsulfate 3-phosphotransferase;Adenylyl-sulfate kinase;APS kinase;ATP-sulfurylase;Bifunctional 3-phosphoadenosine 5-phosphosulfate synthase 1;Sulfate adenylate transferase;Sulfate adenylyltransferase;Sulfurylase kinase 1;PAPSS1 protein;Putative uncharacterized protein PAPSS1;3-phosphoadenosine 5-pho…	IPI00011619;IPI00922088	IPI00011619	ATPSK1;PAPSS;PAPSS1;hCG_20920	O43252;Q05BW9;Q4W5F0;Q4W5H3;Q6IAX6	0.858354		0.0517894	-0.165029	-0.241352	0.56175	1.03655	0.351277	0.89191	0.845952	1.47606	8	5	3	70.832	624	17.1	11.5	5.3	118.4	116.61	64.974	142.23	69.277	51.342	90.51	85.572	14.102	204.72	140.83	19.517	4306200	14465000	13424000	16450000	39994000	36958000	577060	3735400	3001900
4.1B;Band 4.1-like protein 3;Differentially expressed in adenocarcinoma of the lung protein 1;cDNA FLJ77757;cDNA, FLJ95236, highly similar to Homo sapiens differentially expressed in adenocarcinoma of the lung, mRNA;cDNA FLJ46689 fis, clone TRACH3012106, highly similar to Band 4.1-like protein 3	IPI00215716;IPI00032230;IPI00215717;IPI00643553;IPI00921919;IPI00797109;IPI00641850;IPI00639855;IPI00646111;IPI00942218;IPI00643241;IPI00646549	IPI00215716;IPI00032230;IPI00215717	DAL1;EPB41L3;KIAA0987	Q9Y2J2-2;Q9Y2J2;A8K968;B2RB02;B3KY28;Q9Y2J2-1;Q9Y2J2-3	0.0051342	+	3.11509	3.15856	3.47962	2.70708	8.66432	2.31305	8.9294	11.155	6.52997	3	5	19	96.513	865	3.7	10.6	24.7	183.04	150.15	250.94				72.706	154.71	102.95	145.73	138.84	80.53	494570	2466200	577850	1882700	4534200	3425800	125140000	63394000	59316000
40 kDa erythrocyte membrane protein;LanC-like protein 1;cDNA, FLJ92709, highly similar to Homo sapiens LanC lantibiotic synthetase component C-like 1 (bacterial) (LANCL1), mRNA;LanC lantibiotic synthetase component C-like 1 (Bacterial), isoform CRA_a;Putative uncharacterized protein LANCL1;LANCL1 protein;cDNA FLJ51489, highly similar to LanC-like protein 1	IPI00005724;IPI00927255;IPI00925884;IPI00924801	IPI00005724;IPI00927255	GPR69A;LANCL1;hCG_16716	O43813;B2R602;Q53TN2;Q6FHH6;B4DGM7	0.0154164	+	2.19626	1.93783	1.90325	2.74768	4.58288	1.6925	3.8313	3.74056	6.71637	2	6	3	45.283	399	5	18.5	7.8	81.212	106.01	122.19	62.161	46.22	15.941	91.542	92.038	13.032	19.97	236.9	9.5943	1015200	1283400	8037600	4009100	6892700	22718000	2401100	3956600	3109400
40 kDa peptidyl-prolyl cis-trans isomerase;Cyclophilin-40;Cyclophilin-related protein;Peptidyl-prolyl cis-trans isomerase D;Rotamase D;Peptidyl-prolyl cis-trans isomerase;PPID protein	IPI00003927	IPI00003927	CYP40;CYPD;PPID	Q08752;Q05DH6;Q6FGM6	0.0419884	+	0.427046	0.371838	0.305592	0.603709	1.34448	0.149865	1.294	1.23593	1.51962	2	2	1	40.763	370	7.3	8.9	4.3	75.697	82.661	67.399	4.2416	25.041	22.4	45.194	72.468	9.9174	74.289	73.897	0.39179	419160	1155000	1649700	3165800	13525000	6157200	565580	6060200	3339700
40 kDa proline-rich AKT substrate;Proline-rich AKT1 substrate 1	IPI00306195;IPI00549786;IPI00853601	IPI00306195;IPI00549786	AKT1S1;PRAS40	Q96B36-2;Q96B36;Q96B36-1	0.0426453	+	1.08423	0.84326	0.862601	1.54684	2.12025	0.644176	1.7941	1.81831	2.92176	1	1	4	29.262	276	4.3	6.5	17.4	152.4	135.62	108.26				1.5309	10.516	8.9856	140.52	117.96	23.639	710830	804600	3807600	755830	7174500	5175000	1304200	1674900	2005900
40 kDa SR-repressor protein;FUS-interacting serine-arginine-rich protein 1;Splicing factor SRp38;Splicing factor, arginine/serine-rich 13A;TLS-associated protein with Ser-Arg repeats;TLS-associated serine-arginine protein;cDNA FLJ30749 fis, clone FEBRA2000402, highly similar to FUS-interacting serine-arginine-rich protein 1;cDNA FLJ43846 fis, clone TESTI4006393, highly similar to FUS-interacting …	IPI00074587;IPI00412643;IPI00009071;IPI00646643;IPI00386662;IPI00645384;IPI00477946	IPI00074587;IPI00412643;IPI00009071;IPI00646643;IPI00386662;IPI00645384	FUSIP1;FUSIP2;SFRS13A;TASR;RP11-4M23.6-005;RP11-4M23.6-014	O75494-1;O75494;B3KNY6;Q53GD7;O75494-2;O75494-3;B4DJP9;Q5JRI3;O75494-4;Q5JRI1	0.81207		-0.12264	0.383497	-1.02694	0.275524	0.918505	0.445156	1.3045	0.490749	1.21043	2	4	3	31.3	262	5.3	20.2	15.6	161.18	167.95	62.955	159.21	53.14	72.603	133.9	169.77	37.9	88.944	149.41	13.615	1779000	51204000	10144000	23395000	150150000	226050000	16166000	72677000	53100000
40S ribosomal protein S12	IPI00013917	IPI00013917	RPS12	P25398	0.246905		1.83323		2.58217	1.0843	3.56335	2.73511		5.98838	2.12035	0	2	1	14.515	132	0	24.2	16.7	82.354	101.24	91.892				51.357	45.321	74.635				0	0	0	2474000	2342900	5949800	62323	128020	83748
40S ribosomal protein S14	IPI00026271	IPI00026271	PRO2640;RPS14	P62263	0.283485		0.990412	1.87551	1.44623	-0.350497	1.98675	1.47088	3.6693	2.72494	0.784314	1	3	1	16.273	151	10.6	18.5	7.3	138.49	106.88	101.07				78.33	34.015	76.094	248.2	144.67	36.267	48931	59055	242570	9435500	9513700	14771000	6135600	4708700	33277000
40S ribosomal protein S16;cDNA FLJ56786, moderately similar to 40S ribosomal protein S16;RPS16 protein	IPI00221092;IPI00397701;IPI00450975	IPI00221092;IPI00397701;IPI00450975	RPS16	P62249;B4DP32;Q6IPX4	0.600535		1.42451		3.38866	-0.53963	2.68424	6.91936		10.4734	0.687947	0	5	1	16.445	146	0	30.8	9.6	77.936	116.48	155.01				59.076	68.441	81.167				0	0	0	11092000	33496000	18670000	3381000	60162000	3451700
40S ribosomal protein S18;Ke-3;Ribosomal protein S18;Ribosomal protein S18, isoform CRA_b	IPI00013296;IPI00397609;IPI00790711;IPI00894147	IPI00013296;IPI00397609;IPI00790711	D6S218E;RPS18;DADB-159G18.1-001;DAMC-227D19.3-001;DAQB-314F24.10-001;hCG_1640167;XXbac-BCX165D10.12-001;XXbac-BPG185D15.7-001	P62269;Q5SUJ3	0.559329		1.00577		2.21893	-0.207393	2.00802	2.67951		4.65549	0.866101	0	4	1	17.718	152	0	23	8.6	93.279	94.748	131.08				60.73	103.16	90.028				0	0	0	5543600	29002000	24458000	396230	378630	535700
40S ribosomal protein S19;cDNA, FLJ92047, Homo sapiens ribosomal protein S19 (RPS19), mRNA;Ribosomal protein S19, isoform CRA_a;Ribosomal protein S19	IPI00215780	IPI00215780	RPS19;hCG_1995572	P39019;B0ZBD0;Q8WVX7	0.752553		-0.0557667		0.0804082	-0.191942	0.962083	0.128616		1.05732	0.875427	0	1	2	16.06	145	0	7.6	15.9	86.691	107.37	34.775				30.129	11.493	41.622	85.004	59.814	20.49	0	0	0	6040700	7680100	5992500	495080	636480	3118000
40S ribosomal protein S2;40S ribosomal protein S4;Protein LLRep3;Similar to 40S ribosomal protein S2;Ribosomal protein S2;RPS2 protein;Ribosomal protein S2, isoform CRA_b	IPI00013485;IPI00165486;IPI00940323;IPI00871956;IPI00943304;IPI00479366;IPI00386445;IPI00798353;IPI00878297;IPI00878284;IPI00442381	IPI00013485;IPI00165486;IPI00940323;IPI00871956;IPI00943304;IPI00479366;IPI00386445	RPS2;RPS4;LOC392781;tcag7.979;rps2;OK/KNS-cl.6;hCG_1990006;OK/KNS-cl.7	P15880;A4D0Y7;O60249;Q3KQT6;Q6IPX5;Q8J014;Q8N5L9;Q8NI62;Q9BSW5;A6NI39;Q8NI61	0.169272		-0.156155	-0.275594	-0.0207689	-0.172103	0.897413	0.0804995	0.82611	0.985707	0.887548	8	16	14	31.324	293	25.3	50.2	43	102.66	101.41	65.986	86.01	59.834	30.911	37.634	103.87	106.61	232.9	154.04	39.866	1177700	8287700	3613900	38993000	268980000	176610000	20982000	106060000	76808000
40S ribosomal protein S25	IPI00012750;IPI00903251	IPI00012750;IPI00903251	RPS25	P62851	0.385422		1.7383		2.94142	0.535185	3.33642	4.40707		7.68167	1.44913	0	4	1	13.742	125	0	29.6	11.2	59.607	92.952	113.26				41.053	40.726	84.437				0	0	0	2299300	1582700	3528400	22634	57272	118840
40S ribosomal protein S27a;cDNA, FLJ96793, Homo sapiens ribosomal protein S27a (RPS27A), mRNA;Ribosomal protein S27a, isoform CRA_c;Ribosomal protein S27a;Ribosomal protein S27A;cDNA FLJ75516, highly similar to Xenopus tropicalis ubiquitin C, mRNA;Ubiquitin C variant;Ubiquitin C splice variant;Putative uncharacterized protein;UBC protein;cDNA FLJ32377 fis, clone SKMUS1000014, highly similar to Po…	IPI00179330;IPI00798127;IPI00792712;IPI00793729;IPI00789107;IPI00719280;IPI00790633;IPI00794925;IPI00795527;IPI00793810;IPI00797400;IPI00796600;IPI00794211;IPI00796007;IPI00784990;IPI00789823;IPI00456429;IPI00793330;IPI00798155;IPI00654754;IPI00792139;IPI00794205;IPI00418813;IPI00936175;IPI00937730;IPI00879555;IPI00248597	IPI00179330;IPI00798127;IPI00792712;IPI00793729;IPI00789107;IPI00719280;IPI00790633;IPI00794925;IPI00795527;IPI00793810;IPI00797400;IPI00796600;IPI00794211;IPI00796007;IPI00784990;IPI00789823;IPI00456429;IPI00793330;IPI00798155;IPI00654754;IPI00792139;IPI00794205;IPI00418813	RPS27A;UBA80;UBCEP1;hCG_1987923;UBC;DKFZp434K0435;hCG_1998947;UBB;UBA52;UBCEP2;hCG_37048	P62979;B2RDW1;Q5RKT7;Q8WYN9;A8K674;Q59EM9;Q5PY61;Q66K58;Q96H31;Q96MH4;Q9UFQ0;Q96C32;Q5U5U6;B4DV12;Q5UGI3;P62987;Q3MIH3;P62988;Q49A90;A8CGI2	0.00674575	+	1.16424	0.980318	1.20783	1.30458	2.24115	0.25379	1.9729	2.3099	2.47011	10	11	13	17.965	156	46.2	46.2	46.2	122.93	118.13	62.411	109.16	130.23	34.585	75.875	80.203	24.794	182.31	148.37	37.511	96368000	505410000	276410000	128440000	735440000	555200000	332260000	4771100000	1594700000
40S ribosomal protein S3;Ribosomal protein S3 variant;Ribosomal protein S3	IPI00011253;IPI00939811;IPI00855830;IPI00879848	IPI00011253;IPI00939811	OK/SW-cl.26;RPS3	P23396;Q53G83;Q9NQS8	0.521383		-0.191567	-0.6631	-0.0918014	0.180201	0.875654	0.252842	0.63152	0.93835	1.13304	18	30	15	26.688	243	64.6	89.3	71.6	111.24	107.32	48.503	135.04	73.557	61.114	62.64	95.803	75.987	228.47	161.94	41.139	3830300	28433000	5784900	81764000	417600000	301420000	18361000	213320000	113220000
40S ribosomal protein S30	IPI00019770	IPI00019770	FAU	P62861	0.400599		-1.7233	-0.468771	-2.97783		0.302855	0.421184	0.72258	0.126936		2	1	0	14.39	133	8.3	8.3	0	117.49	102.02	144.32	14.733	99.635	100.6							5796400	781480	1353300	368250	1721600	1376000	0	0	0
40S ribosomal protein S3a;v-fos transformation effector protein;cDNA FLJ78591, highly similar to Homo sapiens ribosomal protein S3A (RPS3A), mRNA;cDNA FLJ51870, highly similar to 40S ribosomal protein S3a;Ribosomal protein S3A;Putative uncharacterized protein ENSP00000404946	IPI00419880;IPI00472119;IPI00942312;IPI00736161	IPI00419880;IPI00472119;IPI00942312	FTE1;MFTL;RPS3A	P61247;A8K4W0;B7Z3M5;Q6NXR8;C9JC00	0.0934628		-0.264486	-0.379451	-0.320311	-0.0936954	0.832495	0.0893926	0.76873	0.800897	0.937119	21	26	23	29.945	264	49.2	71.6	64	96.28	101.78	64.209	131.35	64.403	50.789	63.504	108.18	123.09	179.04	146	33.942	3139800	43154000	12516000	104120000	331520000	520880000	60182000	406550000	252930000
40S ribosomal protein S4, X isoform;SCR10;Single copy abundant mRNA protein;cDNA FLJ40595 fis, clone THYMU2010705, highly similar to 40S RIBOSOMAL PROTEIN S4, X ISOFORM;cDNA, FLJ92004, Homo sapiens ribosomal protein S4, X-linked (RPS4X), mRNA;Ribosomal protein S4, X-linked, isoform CRA_c;Ribosomal protein S4, X-linked X isoform variant;RPS4X protein	IPI00217030;IPI00302740;IPI00219894;IPI00643830;IPI00646114;IPI00945801;IPI00877922;IPI00478986;IPI00878172	IPI00217030	CCG2;RPS4;RPS4X;SCAR;hCG_18634	P62701;B2R491;Q53HV1;Q96IR1	0.565797		0.059352	0.218471	-0.081476	0.0410608	1.042	0.110187	1.1635	0.94509	1.02887	1	19	16	29.597	263	3.4	61.2	40.7	124.05	114.49	64.575				77.301	115.53	95.216	251.97	163.02	50.336	75860	205500	305920	70667000	312870000	277960000	41415000	106650000	82219000
40S ribosomal protein S5;40S ribosomal protein S5, N-terminally processed;Ribosomal protein S5 variant	IPI00008433;IPI00555941	IPI00008433	RPS5	P46782;Q53G25	0.813133		-0.0877256		-0.377957	0.202506	0.941005	0.269527		0.769527	1.1507	0	11	12	22.876	204	0	55.4	46.6	109.42	103.88	71.637				49.806	138.17	128.57	220.4	139.23	42.623	0	0	0	41032000	140620000	139910000	8601200	38528000	49805000
40S ribosomal protein S6;Phosphoprotein NP33;cDNA FLJ78049, highly similar to Homo sapiens ribosomal protein S6 (RPS6), mRNA;cDNA, FLJ92127, Homo sapiens ribosomal protein S6 (RPS6), mRNA;Ribosomal protein S6;Ribosomal protein S6, isoform CRA_e;Ribosomal protein S6, isoform CRA_a	IPI00021840;IPI00643522;IPI00640929;IPI00382475;IPI00008011;IPI00552037;REV__IPI00007739	IPI00021840;IPI00643522	OK/SW-cl.2;RPS6;hCG_1741512;RP11-513M16.6-001;RP11-513M16.6-002	P62753;A2A3R6;Q96DV6;A2A3R5	0.8786		-0.116999	-1.42923	0.824111	0.254117	0.922104	0.703078	0.37133	1.77044	1.19261	12	15	14	28.68	249	37.3	38.2	49.8	145.3	135.27	78.589	177.13	112.45	142.18	93.809	97.62	90.636	250.84	137.59	46.328	2258200	9979500	4527200	286560000	216590000	281720000	21779000	120510000	98585000
40S ribosomal protein S7;cDNA, FLJ92055, Homo sapiens ribosomal protein S7 (RPS7), mRNA;Putative uncharacterized protein RPS7;Ribosomal protein S7, isoform CRA_b	IPI00013415;IPI00893703;IPI00478287;IPI00798077;IPI00942012	IPI00013415;IPI00893703;IPI00478287;IPI00798077	RPS7;hCG_1784266	P62081;Q57Z92;B5MCP9	0.468854		0.845637		0.0789446	1.61233	1.79706	1.41507		1.05625	3.05745	0	12	3	22.127	194	0	43.8	14.4	76.167	110.95	80.21				59.053	112.53	84.453	149.05	118.55	16.4	0	0	0	20922000	125880000	81450000	880690	5488500	1853100
40S ribosomal protein S8;Ribosomal protein S8;Similar to ribosomal protein S8	IPI00216587;IPI00645201	IPI00216587;IPI00645201	OK/SW-cl.83;RPS8;hCG_2031852;RP11-269F19.3-001;RP11-269F19.3-003	P62241;Q5JR94;Q5JR95;Q9BS10	0.468677		-0.154464		-0.29443	-0.0144981	0.898466	0.123465		0.815395	0.990001	0	12	10	24.205	208	0	51.9	45.2	134.4	130.7	95.824				61.966	123.11	138.55	261.74	172.57	34.095	0	0	0	41769000	111620000	196970000	4954400	58020000	35557000
40S ribosomal protein S9;Ribosomal protein S9;Ribosomal protein S9, isoform CRA_a;cDNA FLJ61636, highly similar to 40S ribosomal protein S9;Putative uncharacterized protein RPS9;Ribosomal protein S9, isoform CRA_e;Ribosomal protein S9, isoform CRA_c;RPS9 protein	IPI00221088;IPI00954541;IPI00925580;IPI00879238;IPI00847192;IPI00478327;IPI00853062;IPI00879512;IPI00647546	IPI00221088;IPI00954541;IPI00925580;IPI00879238;IPI00847192	RPS9;hCG_2009111;XXbac-BCX105G6.6-001;XXbac-BPG111L9.6-001	P46781;A9C4C1;B7Z732;C9JM19;B5MCT8;A5D904	0.574028		0.179189		-0.0473988	0.405776	1.13225	0.252523		0.96768	1.3248	0	14	1	22.591	194	0	45.4	4.6	147.23	140.62	75.237				147.77	139.4	62.506				0	0	0	727880000	251350000	430120000	444530	531660	1546400
41 kDa phosphoribosypyrophosphate synthetase-associated protein;Phosphoribosyl pyrophosphate synthase-associated protein 2;cDNA, FLJ93570, highly similar to Homo sapiens phosphoribosyl pyrophosphate synthetase-associated protein 2 (PRPSAP2), mRNA;cDNA FLJ52829, highly similar to Phosphoribosyl pyrophosphatesynthetase-associated protein 2;cDNA FLJ52841, highly similar to Phosphoribosyl pyrophospha…	IPI00003168;IPI00942171;IPI00796213;IPI00789576;IPI00795423;IPI00788900;IPI00789022;IPI00798249;IPI00445190;IPI00796690	IPI00003168;IPI00942171;IPI00796213;IPI00789576	PRPSAP2	O60256;B2R7R5;B4E1M8;B4E329;B7ZKZ1;C9K0K7	0.0623627		1.12304	0.866552	0.792282	1.71028	2.17805	0.864174	1.8233	1.73181	3.27225	6	5	6	40.925	369	22	15.4	19.2	121.85	119.35	149.29	58.006	62.669	11.252	101.13	110.88	21.358	196.28	128.49	18.253	7400100	55167000	28466000	10258000	38167000	29119000	5199000	37709000	17484000
450 kDa epidermal antigen;Epiplakin;Putative uncharacterized protein DKFZp434G0719	IPI00010951;REV__IPI00827871;REV__IPI00328754;REV__IPI00941659;REV__IPI00827480	IPI00010951	EPIPL;EPPK1;DKFZp434G0719	P58107;C9JH97;Q9NSU9	0.0981814		-0.997447	-0.842387	-1.15251		0.500885	0.076281	0.55772	0.449843		23	9	0	555.61	5090	17.2	10.5	0	97.585	103.9	104.65	90.181	88.877	82.977	44.243	44.501	27.45				9732600	11779000	13487000	5149600	13435000	4976700	0	0	0
46 kDa DNA polymerase delta interaction protein;Polymerase delta-interacting protein 3;S6K1 Aly/REF-like target;cDNA FLJ52566, highly similar to Polymerase delta-interacting protein 3;POLDIP3 protein;cDNA FLJ54030, highly similar to Polymerase delta-interacting protein 3;Putative uncharacterized protein DKFZp434G0310	IPI00940039;IPI00440688;IPI00440689;IPI00878135;IPI00877685;IPI00429180;IPI00908753	IPI00940039;IPI00440688;IPI00440689;IPI00878135	KIAA1649;PDIP46;POLDIP3;DKFZp434G0310	Q9BY77-1;Q9BY77;B4DMM2;Q96DI9;B4E0L0;Q9BY77-2;Q009A7;C9JF18;Q659C6	0.329771		0.81065	-0.32072	1.87498	0.877685	1.754	1.45185	0.80067	3.66797	1.83742	9	3	5	46.089	421	27.3	10	18.1	159.23	142.11	119.69	88.878	100.58	62.747	146.46	125.14	123.31	237.51	88.76	125.99	9351600	7320300	7969000	850190	4321000	2779800	8112400	10276000	11813000
46 kDa mannose 6-phosphate receptor;Cation-dependent mannose-6-phosphate receptor;cDNA, FLJ93084, highly similar to Homo sapiens mannose-6-phosphate receptor (cation dependent) (M6PR), mRNA;Cation-dependent mannose-6-phosphate receptor variant;M6PR protein;Similar to mannose-6-phosphate receptor (Cation dependent)	IPI00025049;IPI00796659	IPI00025049	M6PR;MPR46;MPRD	P20645;B2R6S2;Q53GY9;Q6I9U3;Q96AH2	0.0730525		0.616147	0.769349	0.814666	0.264426	1.53278	0.307511	1.7045	1.75889	1.20116	3	5	3	30.993	277	16.6	26.4	13.4	89.259	104.33	88.975	68.093	45.173	31.951	44.994	44.908	17.657	122.99	108.01	14.979	3294200	9320400	23086000	6298500	75202000	54801000	687740	3118300	6985600
47 kDa heat shock protein;Arsenic-transactivated protein 3;Cell proliferation-inducing gene 14 protein;Collagen-binding protein;Rheumatoid arthritis-related antigen RA-A47;Serpin H1;cDNA FLJ78501, highly similar to Homo sapiens serpin peptidase inhibitor, clade H (heat shock protein 47), member 1, (collagen binding protein 1) (SERPINH1), mRNA;Rheumatoid arthritis related antigen RA-A47;cDNA FLJ52…	IPI00032140;IPI00910487	IPI00032140;IPI00910487	CBP1;CBP2;HSP47;PIG14;SERPINH1;SERPINH2;ra-a47	P50454;A8K259;Q9NPA9;B4DN87	0.166417		-0.621188	-1.10644	-0.100036	-0.657091	0.650135	0.237232	0.46444	0.93301	0.634156	29	27	17	46.44	418	71.1	63.9	48.8	123.76	126.59	76.119	118.87	112.47	53.887	80.15	114.57	79.131	173.89	143.92	54.655	106630000	970530000	198370000	166130000	982840000	1200200000	75687000	410780000	482600000
47 kDa mannose 6-phosphate receptor-binding protein;Cargo selection protein TIP47;Mannose-6-phosphate receptor-binding protein 1;Perilipin-3;Placental protein 17	IPI00303882;IPI00943550;IPI00106668;IPI00936129	IPI00303882;IPI00943550;IPI00106668	M6PRBP1;PLIN3;TIP47	O60664-1;O60664;O60664-2	0.234625		0.5459	0.164915	0.281193	1.19159	1.45993	0.645977	1.1211	1.2152	2.28404	16	15	10	47.046	434	54.4	40.1	41.7	107.66	101.71	72.948	73.535	79.472	37.975	86.216	83.012	28.53	152.34	139.79	40.578	43021000	64086000	65105000	136110000	252950000	218210000	24419000	69152000	56581000
48 kDa TATA box-binding protein-interacting protein;51 kDa erythrocyte cytosolic protein;INO80 complex subunit J;Repressing pontin 52;RuvB-like 2;TIP49b;TIP60-associated protein 54-beta;cDNA FLJ14856 fis, clone PLACE1001054, highly similar to RuvB-like 2 (EC 3.6.1.-);RuvB-like 2 (E. coli), isoform CRA_d;cDNA FLJ32936 fis, clone TESTI2007533, highly similar to RuvB-like 2 (EC 3.6.1.-);RuvB-like 2 …	IPI00009104;IPI00909925	IPI00009104	CGI-46;INO80J;RUVBL2;TIP48;TIP49B;hCG_16214	Q9Y230;B3KNL2;B3KQ59	0.372016		-0.162252	0.0858326	-0.406646	-0.165944	0.893629	0.153757	1.0613	0.754375	0.891345	26	18	10	51.156	463	62	49	27.9	124.18	118.58	49.029	137.06	124.83	31.217	120.76	130.66	53.466	89.026	115.57	26.209	47665000	205650000	130660000	33804000	210210000	150390000	12003000	73487000	60516000
49 kDa TATA box-binding protein-interacting protein;54 kDa erythrocyte cytosolic protein;INO80 complex subunit H;Nuclear matrix protein 238;Pontin 52;RuvB-like 1;TIP49a;TIP60-associated protein 54-alpha;cDNA FLJ34844 fis, clone NT2NE2011154, highly similar to RuvB-like 1	IPI00021187;IPI00788942;IPI00944937;IPI00796459;IPI00798367;IPI00797004;IPI00790295	IPI00021187;IPI00788942	INO80H;NMP238;RUVBL1;TIP49;TIP49A	Q9Y265-1;Q9Y265;B5BUB1;Q9Y265-2;B3KRS7	0.23395		-0.323016	-0.0972696	-0.704164	-0.167615	0.799397	0.173917	0.9348	0.613798	0.890313	24	16	9	50.227	456	51.5	41.7	28.5	109.63	106.75	43.66	136.36	127.6	24.766	29.576	106.41	77.601	141.71	119.54	25.81	57778000	175880000	103810000	24353000	143140000	104190000	19344000	72540000	76286000
4-alpha-glucanotransferase;Amylo-alpha-1,6-glucosidase;Dextrin 6-alpha-D-glucosidase;Glycogen debrancher;Glycogen debranching enzyme;Oligo-1,4-1,4-glucantransferase	IPI00328318;IPI00514126;IPI00219066;IPI00219065	IPI00328318;IPI00514126;IPI00219066;IPI00219065	AGL;GDE	P35573-1;P35573;P35573-3;P35573-2	0.00567793	+	2.01993	1.81975	1.91992	2.32013	4.05564	0.782082	3.5302	3.78401	4.99376	8	13	15	174.89	1533	7	12	12.9	127.18	123.54	164.4	154.94	169.34	38.829	116.96	82.261	115.34	85.594	101.22	63.819	5437800	2443400	10330000	10250000	8362600	16153000	125750000	86437000	220060000
4F2 cell-surface antigen heavy chain;4F2 heavy chain antigen;Lymphocyte activation antigen 4F2 large subunit;cDNA FLJ54090, highly similar to 4F2 cell-surface antigen heavy chain	IPI00554481;IPI00554611;IPI00604710;IPI00554702;IPI00554722;IPI00027493;IPI00908885	IPI00554481;IPI00554611;IPI00604710;IPI00554702;IPI00554722;IPI00027493	MDU1;SLC3A2	P08195-4;P08195;P08195-1;P08195-3;P08195-2;B4E2Z3	0.170096		-1.16007	-0.454743	-0.778461	-2.24702	0.44749	0.267543	0.72964	0.582988	0.210659	21	23	9	71.122	661	33.6	37.5	16.3	128.8	122.03	95.093	113.09	109.87	66.253	113.71	110.87	57.908	123.82	91.945	62.702	73405000	288130000	123360000	56232000	379160000	755190000	25854000	55599000	60488000
4F2 light chain;CD98 light chain;Integral membrane protein E16;Large neutral amino acids transporter small subunit 1;L-type amino acid transporter 1;Solute carrier family 7 member 5;y+ system cationic amino acid transporter;Large neutral amino acids transporter 1;Solute carrier family 7 (Cationic amino acid transporter, y+ system), member 5	IPI00008986;IPI00644701;IPI00549477;IPI00643866;IPI00910358	IPI00008986	CD98LC;LAT1;MPE16;SLC7A5	Q01650;Q2MCL6;Q8IV97	0.203109		-1.85053	-0.860295	-0.856787	-3.83451	0.27729	0.277945	0.55084	0.552181	0.0700967	3	4	1	55.01	507	6.7	8.1	3.6	150.87	149.36	130.36	159.18	192.68	152.4	150.2	53.499	131.4				4419600	3275400	2667500	3647700	8700800	5126000	198540	345900	519800
4-hydroxyphenylpyruvate dioxygenase-like protein;Glyoxalase domain-containing protein 1	IPI00063762	IPI00063762	GLOXD1;HPDL	Q96IR7	0.013128	+	-1.03963	-1.21883	-0.810978	-1.08909	0.486451	0.0722547	0.42963	0.569995	0.470057	2	7	2	39.385	371	5.9	29.1	6.2	134.72	67.93	99.622	151.56	140.21	11.35	24.767	26.194	18.555	24.611	38.784	14.173	5406900	2987800	2715400	14792000	43725000	10738000	767800	4758800	1056200
4Ig-B7-H3;B7 homolog 3;CD276 antigen;Costimulatory molecule;cDNA FLJ78639;cDNA FLJ78024;cDNA FLJ61301, highly similar to CD276 antigen	IPI00410488;IPI00719044;IPI00793688;IPI00441094;IPI00019275	IPI00410488;IPI00719044;IPI00793688;IPI00441094;IPI00019275	B7H3;CD276;PSEC0249;UNQ309/PRO352	Q5ZPR3-1;Q5ZPR3;A8K6Q6;A8K9J6;B4DK26;Q5ZPR3-4;Q5ZPR3-3;Q5ZPR3-2	0.113812		0.633132	1.08045	0.52901	0.289933	1.55093	0.464703	2.1147	1.44294	1.22258	4	3	4	57.235	534	12	12	12	108.87	95.762	66.874	82.653	67.101	12.958	25.14	73.917	64.863	96.599	112.06	27.581	2253100	14372000	17200000	2361300	21538000	14676000	803630	9559200	6289200
4-phosphopantetheinyl transferase;Alpha-aminoadipic semialdehyde dehydrogenase-phosphopantetheinyl transferase;L-aminoadipate-semialdehyde dehydrogenase-phosphopantetheinyl transferase;LYS5 ortholog;cDNA FLJ57947, highly similar to L-aminoadipate-semialdehydedehydrogenase-phosphopantetheinyl transferase (EC 2.7.8.-)	IPI00250297	IPI00250297	AASDHPPT;CGI-80;HAH-P;HSPC223;x0005	Q9NRN7;B4DDW7	0.0825188		2.32067	2.01817		2.62318	4.99565	1.49224	4.0507		6.16105	3	0	3	35.776	309	10.4	0	12.3	140.13	163.35	154.92	175.21	172.25	4.6931				138.17	186.59	65.754	3611400	5936000	13219000	0	0	0	612290	7756100	4047900
4-trimethylaminobutyraldehyde dehydrogenase;Aldehyde dehydrogenase E3 isozyme;Aldehyde dehydrogenase family 9 member A1;Gamma-aminobutyraldehyde dehydrogenase;R-aminobutyraldehyde dehydrogenase;cDNA FLJ55534, highly similar to 4-trimethylaminobutyraldehyde dehydrogenase (EC 1.2.1.47);cDNA FLJ53231, highly similar to 4-trimethylaminobutyraldehyde dehydrogenase(EC 1.2.1.47);cDNA FLJ51658, highly si…	IPI00479877	IPI00479877	ALDH4;ALDH7;ALDH9;ALDH9A1;hCG_21745	P49189;B4DE91;B4DX14;B4DXY7;B4DYY1;B9EKV4	0.231323		0.605027	0.234133	0.264131	1.31682	1.52101	0.752158	1.1762	1.20091	2.49116	12	10	9	56.291	518	25.9	23	15.1	94.122	94.784	58.798	75.598	47.388	19.029	51.355	58.074	18.145	99.93	91.666	29.478	21838000	40834000	34758000	52182000	142090000	177200000	10024000	12129000	37967000
5(3)-deoxyribonucleotidase, cytosolic type;Cytosolic 5,3-pyrimidine nucleotidase;Deoxy-5-nucleotidase 1	IPI00005573;IPI00790117;IPI00386083;IPI00795829	IPI00005573;IPI00790117;IPI00386083;IPI00795829	DNT1;NT5C;UMPH2	Q8TCD5-1;Q8TCD5;Q8TCD5-2	0.156238		1.28995		0.966855	1.61303	2.44519	0.780908		1.95458	3.05895	0	2	1	23.382	201	0	15.4	7	130.91	78.825	120.87				23.374	22.853	34.605				0	0	0	1667000	1580400	8843800	1064700	537540	1295300
50 kDa dynein-associated polypeptide;Dynactin complex 50 kDa subunit;Dynactin subunit 2;p50 dynamitin;cDNA, FLJ95559, Homo sapiens dynactin 2 (p50) (DCTN2), mRNA;cDNA FLJ38923 fis, clone NT2NE2011823, highly similar to Dynactin subunit 2;Dynactin 2 variant;cDNA FLJ31120 fis, clone IMR322000730, highly similar to Dynactin subunit 2;cDNA FLJ77785;Dynactin 2 (P50), isoform CRA_b	IPI00220503;IPI00789792;IPI00791846;IPI00789999;IPI00789063;IPI00791194	IPI00220503;IPI00789792;IPI00791846	DCTN2;DCTN50;hCG_2016464	Q13561;B2RBK5;B3KTX4;Q53H88;A8K8J9	0.0456833	+	1.46518	1.86608	0.822988	1.70646	2.76097	0.991635	3.6454	1.76907	3.2636	12	11	14	44.819	406	32	37.7	44.1	148.77	132.44	149.91	113.7	77.074	21.591	60.305	71.505	20.942	113.19	84.924	72.868	19733000	79658000	67513000	39936000	178690000	117540000	21041000	31471000	45967000
50 kDa nuclear polyadenylated RNA-binding protein;Bruno-like protein 2;CUG triplet repeat RNA-binding protein 1;CUG-BP- and ETR-3-like factor 1;CUGBP Elav-like family member 1;Deadenylation factor CUG-BP;Embryo deadenylation element-binding protein homolog;RNA-binding protein BRUNOL-2;cDNA FLJ61559, highly similar to CUG triplet repeat RNA-binding protein 1	IPI00853009;IPI00034015;IPI00218389;IPI00218388	IPI00853009;IPI00034015;IPI00218389;IPI00218388	BRUNOL2;CELF1;CUGBP;CUGBP1;NAB50	Q92879-4;Q92879;Q92879-1;B4E2U5;Q92879-3;Q92879-2	0.140779		-0.500981	-0.613608	-0.388355		0.706626	0.078093	0.65356	0.764		9	5	0	55	512	17.8	10.7	0	133.3	123.1	63.984	137.8	114.74	37.614	101.53	65.735	62.755				3159600	12001000	14233000	7345800	28429000	23307000	0	0	0
50 kDa nucleoporin;Nuclear pore complex protein Nup50;Nuclear pore-associated protein 60 kDa-like;Nucleoporin Nup50;cDNA FLJ54237, highly similar to Nucleoporin 50 kDa;HCG1989366, isoform CRA_c;Nucleoporin 50kDa;NUP50 protein	IPI00026940;IPI00170581;IPI00889717;IPI00940742	IPI00026940;IPI00170581;IPI00889717	NPAP60L;NUP50;PRO1146;CTA-268H5.7-002;hCG_1989366;CTA-268H5.7-017	Q9UKX7;B4E2D3;Q8N6V5;B0QY21	0.274686		-1.57683	-0.850845	-2.30282		0.335218	0.248755	0.55446	0.202667		11	2	0	50.144	468	38	7.5	0	111.7	117.29	96.887	136.5	147.54	55.906	49.921	56.205	114.39				30290000	20261000	17219000	115920	3780500	1267900	0	0	0
51 kDa FK506-binding protein;52 kDa FK506-binding protein;59 kDa immunophilin;FK506-binding protein 4;FKBP59;HSP-binding immunophilin;Immunophilin FKBP52;Peptidyl-prolyl cis-trans isomerase FKBP4;Peptidyl-prolyl cis-trans isomerase FKBP4, N-terminally processed;Rotamase;cDNA, FLJ94557, highly similar to Homo sapiens FK506 binding protein 4, 59kDa (FKBP4), mRNA	IPI00219005	IPI00219005	FKBP4;FKBP52	Q02790;B2R9U2	0.881502		-0.0253169	0.0708015	-0.319502	0.17275	0.982605	0.170331	1.0503	0.801346	1.12721	30	23	12	51.804	459	53.4	52.7	29.6	124.74	122.22	76.817	110.46	114.16	29.243	92.486	101.29	45.043	102.93	85.113	25.267	40800000	172590000	98576000	55051000	195240000	146170000	51094000	338880000	206540000
51 kDa FK506-binding protein;54 kDa progesterone receptor-associated immunophilin;Androgen-regulated protein 6;FF1 antigen;FK506-binding protein 5;FKBP54;HSP90-binding immunophilin;Peptidyl-prolyl cis-trans isomerase FKBP5;Rotamase;cDNA FLJ57237, highly similar to FK506-binding protein 5 (EC 5.2.1.8);cDNA FLJ58213, highly similar to FK506-binding protein 5 (EC 5.2.1.8);FK506 binding protein 5;FK5…	IPI00218775;IPI00443474;IPI00556067	IPI00218775	AIG6;FKBP5;FKBP51;hCG_17659;RP3-340B19.6-001	Q13451;B7Z7Z8;B7Z8G2;Q2TA84;Q53GX4;Q5TGM6	0.377964		-0.465794	-0.813956	-0.943434	0.360008	0.724073	0.427375	0.56882	0.519994	1.28343	7	3	6	51.212	457	18.8	5.9	21.2	115.04	115.96	81.959	105.83	101.82	29.864	34.439	67.395	15.603	207.45	219.65	47.638	4977500	7691000	4063400	1020000	6964200	1912800	4667300	9503700	7633300
5-3 exoribonuclease 2;DHM1-like protein;cDNA FLJ10711 fis, clone NT2RP3000917, highly similar to 5-3 exoribonuclease 2 (EC 3.1.11.-);cDNA FLJ55645, highly similar to 5-3 exoribonuclease 2 (EC 3.1.11.-);cDNA FLJ54526, highly similar to 5-3 exoribonuclease 2 (EC 3.1.11.-)	IPI00100151;IPI00788157;IPI00939534;IPI00829723	IPI00100151;IPI00788157	XRN2	Q9H0D6-1;Q9H0D6;B3KMC9;B4DZC3;B4E0B9;Q9H0D6-2	0.0187894	+	-0.913661	-0.688311	-1.12796	-0.924708	0.530836	0.0818173	0.62058	0.457561	0.526787	27	15	7	108.58	950	35.9	21.6	11.6	139.09	141.2	66.711	112.87	92.499	47.04	108.66	114.86	33.431	146.61	144.79	37.694	58469000	109270000	63725000	25921000	111000000	107690000	36054000	199310000	215500000
53 kDa BRG1-associated factor A;Actin-like protein 6A;Actin-related protein Baf53a;ArpNbeta;BRG1-associated factor 53A;INO80 complex subunit K;Actin-like 6A isoform 1 variant;BAF53A protein	IPI00003627;IPI00216622;IPI00792088;IPI00790197;IPI00007776;IPI00945240;IPI00944907;IPI00793214	IPI00003627;IPI00216622	ACTL6A;BAF53;BAF53A;INO80K	O96019-1;O96019;Q53FS0;Q6FI97;O96019-2	0.195497		-0.795042	-0.0585631	-1.49493	-0.831634	0.576327	0.307703	0.96022	0.354799	0.561892	8	7	4	47.46	429	31	27.7	17	88.666	91.141	61.401	93.098	85.131	50.136	78.63	74.151	83.666	105.6	109.56	14.609	12027000	16319000	24045000	33451000	78864000	32300000	462800	7697400	5689300
54 kDa nuclear RNA- and DNA-binding protein;55 kDa nuclear protein;DNA-binding p52/p100 complex, 52 kDa subunit;NMT55;Non-POU domain-containing octamer-binding protein;p54(nrb);cDNA FLJ76817, highly similar to Homo sapiens non-POU domain containing, octamer-binding (NONO), mRNA;cDNA FLJ56109, highly similar to Non-POU domain-containing octamer-binding protein;Putative uncharacterized protein NONO	IPI00304596;IPI00922367;IPI00645010;IPI00644848;IPI00847558;IPI00645966;IPI00646520;IPI00647641	IPI00304596;IPI00922367;IPI00645010;IPI00644848	NONO;NRB54	Q15233;A8K525;B7Z4C2;C9JYS8;C9JRA5	0.173771		-0.0845225	-0.0781371	-0.0173518	-0.158078	0.943097	0.0460095	0.94728	0.988045	0.896218	51	26	20	54.231	471	72.2	49.5	39.7	159.11	147.34	56.491	175.3	152.37	48.367	120.67	145.13	54.151	194.01	151.29	60.399	136560000	681960000	272330000	131650000	726460000	691310000	63801000	1058200000	615540000
56 kDa U2AF65-associated protein;ATP-dependent RNA helicase p47;DEAD box protein UAP56;HLA-B-associated transcript 1 protein;Spliceosome RNA helicase BAT1;HLA-B associated transcript 1;cDNA FLJ53073, highly similar to Spliceosome RNA helicase Bat1 (EC 3.6.1.-);HCG2005638, isoform CRA_c;HLA-B associated transcript 1 variant	IPI00641829;IPI00848161;IPI00790636;IPI00893580;IPI00792043;IPI00894161;IPI00643815;IPI00796920;IPI00642800;IPI00641634;IPI00893920;IPI00892588;IPI00894545;IPI00893927;IPI00939221;IPI00792599;IPI00893446;IPI00642880;IPI00641325;IPI00640787;IPI00641926;IPI00795722;IPI00791495;IPI00893059;IPI00644541;IPI00893300;IPI00908716;IPI00024539;REV__IPI00886959;REV__IPI00455521;IPI00794086	IPI00641829;IPI00848161;IPI00790636;IPI00893580;IPI00792043;IPI00894161;IPI00643815;IPI00796920;IPI00642800;IPI00641634;IPI00893920	BAT1;UAP56;XXbac-BCX270M2.2-006;DADB-26I14.7-006;DAMA-25N12.12-006;DAMA-BMC190B12.8-006;DAQB-72H16.1-006;DASS-161H22.1-006;XXbac-BPG296P20.6-006;DAAP-97M17.4-003;XXbac-BPG296P20.6-019;DASS-161H22.1-019;XXbac-BCX270M2.2-019;DAQB-72H16.1-019;DAMA-25N12.12-019;DADB-26I14.7-019;DAMA-BMC190B12.8-019;hCG_2005638;DAAP-97M17.4-006;DASS-161H22.1-017;XXbac-BCX270M2.2-017;DAQB-72H16.1-017;DAMA-25N12.12-017;…	Q13838-2;Q13838;Q13838-1;Q5STA0;Q5STU3;B0V2L1;A2AB31;A2BF53;A6PWH0;B0S4X1;B0S8C2;B0UZ17;B0UZ98;B4DP52;B0V2L2;A2BF54;A6PWH1;B0S4X2;B0S8C3;B0UZ18;B0UZ99;A2BF56;B0S4X4;B0S8B3;B0UZ21;B0UZA2;Q59G92;Q5STA2;Q5STU9;A2BF57;A6PWH2;B0S4X3;B0S8B2;B0UZ20;B0UZA1;A2BF55;A6PWH3;B0S8C4;B0UZ19;B0UZA0;Q5RJ65;B0V2L3	0.121179		-0.482619	-0.368775	-0.844948	-0.234133	0.715677	0.152347	0.77444	0.556731	0.850196	29	20	22	50.679	443	55.8	42.7	47	130.98	126.5	46.514	162.2	148.94	39.655	82.307	116.11	89.457	135.64	117.49	24.702	41939000	378250000	122890000	88849000	328130000	616880000	62683000	314670000	331400000
58 kDa glucose-regulated protein;58 kDa microsomal protein;Disulfide isomerase ER-60;Endoplasmic reticulum resident protein 57;Endoplasmic reticulum resident protein 60;Protein disulfide-isomerase A3;cDNA PSEC0148 fis, clone PLACE1007202, highly similar to Protein disulfide-isomerase A3 (EC 5.3.4.1);cDNA PSEC0175 fis, clone OVARC1000169, highly similar to Protein disulfide-isomerase A3 (EC 5.3.4.…	IPI00025252;IPI00790740;IPI00791418	IPI00025252	ERP57;ERP60;GRP58;PDIA3	P30101;B3KQT2;B3KQT9;B4DDM1	0.908428		-0.0174161	0.247198	-0.113834	-0.185613	0.988001	0.166179	1.1869	0.924129	0.879275	56	53	45	56.782	505	72.3	72.3	63.8	118.75	121.14	50.699	143.37	127.22	52.335	77.796	120.37	84.849	140.95	118.23	27.015	374740000	4602500000	1077900000	684760000	4119000000	4592100000	328260000	2915300000	2305300000
59 kDa dystrophin-associated protein A1 acidic component 1;Alpha-1-syntrophin;Pro-TGF-alpha cytoplasmic domain-interacting protein 1;Syntrophin-1;cDNA FLJ38623 fis, clone HEART2008509, highly similar to Alpha-1-syntrophin;Syntrophin, alpha 1 (Dystrophin-associated protein A1, 59kDa, acidic component), isoform CRA_a;SNTA1 protein;cDNA FLJ56556, highly similar to Alpha-1-syntrophin	IPI00164528;IPI00910896	IPI00164528;IPI00910896	SNT1;SNTA1;hCG_37901	Q13424;B3KTR0;Q29RY0;B4DX40	0.247934		2.05393		2.8969	1.21096	4.15236	3.6298		7.44823	2.31492	0	4	3	53.895	505	0	9.1	7.5	127.07	157.07	185.35				106.96	83.879	11.131	37.144	55.683	17.377	0	0	0	8056000	4008100	7105500	2124600	3022500	5275700
59 kDa dystrophin-associated protein A1 basic component 1;Beta-1-syntrophin;BSYN2;Syntrophin-2;Tax interaction protein 43	IPI00026059;IPI00216858	IPI00026059;IPI00216858	SNT2B1;SNTB1	Q13884-1;Q13884;Q13884-2	0.0732765		-1.3197	-0.566698	-1.63138	-1.76103	0.400617	0.21191	0.67516	0.322778	0.295037	2	2	2	58.06	538	4.6	7.4	7.4	182.7	129.86	147.34				186.5	81.025	69.743	101.78	70.353	31.423	734650	769020	753570	4144700	3078600	1481900	1489800	5313100	1037000
59 kDa dystrophin-associated protein A1 basic component 2;Beta-2-syntrophin;Syntrophin-3;Syntrophin-like;Putative uncharacterized protein SNTB2	IPI00009505;IPI00216631	IPI00009505;IPI00216631	D16S2531E;SNT2B2;SNTB2;SNTL	Q13425-1;Q13425;Q13425-2;C9JMY8	0.158805		-0.931536	-0.342268	-1.75288	-0.699463	0.5243	0.249634	0.7888	0.296709	0.615801	3	1	1	57.949	540	6.3	1.7	2	106.92	118.13	91.392	156.65	151.45	6.5759							9328100	2212000	2007800	436540	2384200	1516400	1301700	444560	3582500
59 kDa serine/threonine-protein kinase;ILK-1;ILK-2;Integrin-linked protein kinase;p59ILK;cDNA FLJ53825, highly similar to Integrin-linked protein kinase 1 (EC 2.7.11.1);cDNA FLJ50979, moderately similar to Integrin-linked protein kinase (EC 2.7.11.1)	IPI00013219;IPI00921075;IPI00922759	IPI00013219;IPI00921075;IPI00922759	ILK;ILK1;ILK2	Q13418;B7Z1I0;B7Z418	0.343872		0.204187	0.0817486	0.326624		1.15204	0.138434	1.0583	1.25408		2	3	0	51.419	452	5.3	7.7	0	81.403	61.086	51.189	69.481	75.185	31.928	40.718	44.393	11.699				3557300	3212700	4192700	4800000	38467000	24427000	0	0	0
5-aminoimidazole-4-carboxamide ribonucleotide formyltransferase;AICAR transformylase;ATIC;Bifunctional purine biosynthesis protein PURH;IMP cyclohydrolase;IMP synthase;Inosinicase;Phosphoribosylaminoimidazolecarboxamide formyltransferase;cDNA, FLJ93545, highly similar to Homo sapiens 5-aminoimidazole-4-carboxamide ribonucleotide formyltransferase/IMP cyclohydrolase (ATIC), mRNA;5-aminoimidazole-4…	IPI00289499;IPI00925601;IPI00926426;IPI00926103;IPI00925871;IPI00925253;IPI00927536	IPI00289499;IPI00925601	ATIC;OK/SW-cl.86;PURH;hCG_16691	P31939;B2R7P8;A8K202;B4DP06	0.791674		-0.0566622	0.0315363	-0.417488	0.215965	0.961486	0.20997	1.0221	0.748727	1.16148	34	23	13	64.615	592	63	47.3	29.4	109.47	103.21	74.831	72.268	64.574	21.88	64.142	88.105	69.449	121.08	108.24	36.866	76520000	224150000	225090000	97119000	355090000	304600000	84502000	174080000	221740000
5-AMP-activated protein kinase catalytic subunit alpha-1	IPI00410287;IPI00792482;IPI00061282	IPI00410287;IPI00792482	AMPK1;PRKAA1	Q13131-2;Q13131;Q13131-1	0.0199416	+	1.64916	2.04033	1.68367	1.22347	3.13651	0.889184	4.1134	3.21244	2.33508	1	3	2	65.522	574	1.7	7.7	3.1	107.38	117.46	141.72				90.028	75.379	4.9634	51.278	117.1	47.398	530450	643890	4078800	15366000	3036500	10598000	3295600	3778700	4004900
5-beta-cholestane-3-alpha,7-alpha,12-alpha-triol 27-hydroxylase;Cytochrome P450 27;Cytochrome P-450C27/25;Sterol 26-hydroxylase, mitochondrial;Sterol 27-hydroxylase;Vitamin D(3) 25-hydroxylase	IPI00025307	IPI00025307	CYP27;CYP27A1	Q02318	0.309997		-0.782945	-0.368402	-1.19749		0.581179	0.239431	0.77464	0.436034		2	1	0	60.234	531	4.3	1.5	0	99.953	133.78	107.76	172.79	152.18	27.555							5067100	786370	642870	838330	2488200	675830	0	0	0
5F7;Basigin;Collagenase stimulatory factor;Extracellular matrix metalloproteinase inducer;Leukocyte activation antigen M6;OK blood group antigen;Tumor cell-derived collagenase stimulatory factor;cDNA FLJ52708, highly similar to Basigin;cDNA FLJ61188, highly similar to Basigin;Basigin (Ok blood group), isoform CRA_a;cDNA FLJ36018 fis, clone TESTI2016337, highly similar to BASIGIN;Cervical EMMPRIN;…	IPI00218019;IPI00019906;IPI00394877;IPI00908477	IPI00218019;IPI00019906;IPI00394877;IPI00908477	BSG;UNQ6505/PRO21383;hCG_20562;hEMMPRIN	P35613-1;P35613;B4DNE1;P35613-2;B4DY23;Q54A51;A6NJW1;A8MZ77;B4DL60	0.00274713	+	-0.672576	-0.67321	-0.733441	-0.611078	0.627385	0.0266259	0.62711	0.601468	0.654707	9	9	6	42.2	385	26.5	26.5	20.3	115.75	108.37	78.975	87.778	73.238	60.518	83.9	90.962	82.202	199.03	110.51	33.698	68509000	214210000	157180000	398940000	375310000	279580000	10914000	115300000	63486000
5H9 antigen;CD9 antigen;Cell growth-inhibiting gene 2 protein;Leukocyte antigen MIC3;Motility-related protein;p24;Tetraspanin-29;Putative uncharacterized protein CD9;cDNA FLJ51032, highly similar to CD9 antigen;cDNA FLJ56697, highly similar to CD9 antigen	IPI00215997;IPI00657796;IPI00795937;IPI00908644	IPI00215997;IPI00657796;IPI00795937;IPI00908644	CD9;GIG2;MIC3;TSPAN29	P21926;A6NNI4;B4DPP0;B4DK09	0.152852		-1.35665	-0.202755	-1.63775	-2.22943	0.390489	0.35151	0.86889	0.321357	0.213242	2	1	1	25.416	228	9.2	4.8	4.8	128.32	148.6	97.005	21.52	113.3	18.76	81.417	65.5	43.925				1034400	578030	482950	325900	643670	899670	280060	195360	533190
5-methylthioadenosine phosphorylase;S-methyl-5-thioadenosine phosphorylase;MTAP protein;cDNA FLJ59758, highly similar to S-methyl-5-thioadenosine phosphorylase (EC 2.4.2.28)	IPI00942294;IPI00011876;IPI00903024;IPI00382958;IPI00915917;IPI00016626	IPI00942294;IPI00011876	MSAP;MTAP	Q13126;Q05DJ2;B4DUC8;Q6FHP1;Q6FHT1	0.588288		0.224147		-0.0727232	0.521018	1.16809	0.342329		0.950841	1.43497	0	4	4	31.236	283	0	20.8	20.8	97.894	102.17	80.736				24.366	36.181	12.24	180.17	107.81	40.021	0	0	0	9640800	47528000	42858000	2921100	3296000	8422500
5-nucleotidase domain-containing protein 1;cDNA FLJ76092, highly similar to Homo sapiens 5-nucleotidase, cytosolic II-like 1 (NT5C2L1), mRNA;5-nucleotidase domain containing 1, isoform CRA_b;cDNA FLJ33599 fis, clone BRAMY2013736, highly similar to 5-nucleotidase domain-containing protein 1	IPI00177965;IPI00903275;IPI00514986;IPI00514738	IPI00177965;IPI00903275	LP2642;NT5C2L1;NT5DC1;hCG_2031155	Q5TFE4;A8K2Z3;B3KR35	0.259687		-1.01361	-0.575573	-1.45165		0.495305	0.215962	0.67102	0.365604		7	1	0	51.844	455	20.2	4.4	0	116.04	110.89	85.545	72.697	55.195	49.07							3539800	6290900	6022400	993750	2370500	872700	0	0	0
5-nucleotidase domain-containing protein 2;Putative uncharacterized protein NT5DC2	IPI00783118;IPI00009662;IPI00945729;IPI00100938;IPI00783682;IPI00795164;IPI00791633;IPI00945239;IPI00797435;IPI00947366;IPI00795820;IPI00947528	IPI00783118;IPI00009662;IPI00945729;IPI00100938;IPI00783682	NT5DC2	Q9H857-2;Q9H857;Q9H857-1;C9JTZ6;Q9H857-3;Q9H857-4	0.0263941	+	-1.44973	-1.01642	-1.4863	-1.84647	0.366089	0.109448	0.49434	0.356926	0.278071	12	10	2	64.144	557	27.5	22.6	5.9	110.24	112.72	93.665	123.62	118.83	67.839	71.533	85.323	14.781	22.276	3.1682	4.0563	19718000	35017000	43734000	13019000	59821000	28105000	1813800	10216000	3014500
5-nucleotidase;Ecto-5-nucleotidase;cDNA, FLJ95508, highly similar to Homo sapiens 5-nucleotidase, ecto (CD73) (NT5E), mRNA;cDNA FLJ90602 fis, clone PLACE1001464, highly similar to 5-nucleotidase;5-nucleotidase, ecto (CD73), isoform CRA_a;5-nucleotidase, ecto (CD73);cDNA FLJ90527 fis, clone NT2RP4001467, highly similar to 5-nucleotidase (EC 3.1.3.5)	IPI00009456;IPI00552302;IPI00647259;IPI00552444	IPI00009456;IPI00552302	NT5;NT5E;NTE;hCG_401111;RP11-321N4.1-003	P21589;B2RBH2;B3KQK1;Q53Z63;Q6NZX3;B3KQI8;Q5JRQ2	0.703712		0.252081	0.754032	-0.24987		1.19092	0.597878	1.6865	0.840972		5	14	0	63.367	574	14.5	27.7	0	124.44	95.757	176.99	88.337	87.496	12.803	79.149	70.635	41.111				17507000	9624800	16520000	37581000	52943000	31412000	0	0	0
5-phosphoribosylglycinamide transformylase;AIR synthase;GAR transformylase;Glycinamide ribonucleotide synthetase;Phosphoribosylamine--glycine ligase;Phosphoribosyl-aminoimidazole synthetase;Phosphoribosylformylglycinamidine cyclo-ligase;Phosphoribosylglycinamide formyltransferase;Phosphoribosylglycinamide synthetase;Trifunctional purine biosynthetic protein adenosine-3;cDNA FLJ51866, highly simil…	IPI00025273;IPI00218408;IPI00879865;IPI00657864;IPI00657647;IPI00917833;IPI00657700;IPI00657768;IPI00384624;IPI00893596	IPI00025273	GART;PGFT;PRGS	P22102-1;P22102;B4DJ93;Q15374;Q3B7A7;Q59HH3;Q71VH3	0.140307		-0.352261	-0.2881	-0.634593	-0.134089	0.783356	0.135673	0.81898	0.644122	0.911245	24	16	4	107.77	1010	33.7	27.1	5.3	118.61	114.5	53.361	131.87	114.2	48.188	88.898	90.445	54.062	75.054	101.23	29.496	204110000	152690000	83975000	49638000	167780000	155220000	35089000	33356000	51592000
5T4 oncofetal antigen;5T4 oncofetal trophoblast glycoprotein;M6P1;Trophoblast glycoprotein;cDNA FLJ78281, highly similar to Homo sapiens trophoblast glycoprotein (TPBG), mRNA;cDNA FLJ90309 fis, clone NT2RP2000903, highly similar to Trophoblast glycoprotein	IPI00009111	IPI00009111	5T4;TPBG;hCG_401114	Q13641;A8K555	0.655592		0.460893	1.22805	-0.306262		1.37639	1.08454	2.3425	0.808734		3	4	1	46.031	420	9.5	12.9	2.4	91.928	77.684	51.701	58.12	48.072	44.386	50.6	45.239	24.147				16068000	9198700	26982000	6927700	24561000	8882000	0	0	0
60 kDa BRG-1/Brm-associated factor subunit C;BRG1-associated factor 60C;SWI/SNF-related matrix-associated actin-dependent regulator of chromatin subfamily D member 3;cDNA FLJ45690 fis, clone FCBBF5000384, highly similar to SWI/SNF-related matrix-associated actin-dependent regulator of chromatin subfamily Dmember 3;cDNA FLJ52707, highly similar to SWI/SNF-related matrix-associatedactin-dependent r…	IPI00456146;IPI00106988;IPI00903013;IPI00922828;IPI00945076	IPI00456146;IPI00106988;IPI00903013;IPI00922828	BAF60C;SMARCD3	Q6STE5-1;Q6STE5;Q6STE5-2;B3KXL9;B7Z4U8;B7ZA58	0.500436		0.875231	-0.00119838		1.75166	1.8343	1.67463	0.99917		3.36746	3	0	1	55.015	483	5.6	0	4.8	116.05	165.72	167.64	104.53	45.881	19.994							30526000	8965900	10187000	0	0	0	197440	2212900	2934800
60 kDa chaperonin;60 kDa heat shock protein, mitochondrial;Chaperonin 60;Heat shock protein 60;HuCHA60;Mitochondrial matrix protein P1;P60 lymphocyte protein;Mitochondrial heat shock 60kD protein 1 variant 1;cDNA FLJ54912, highly similar to 60 kDa heat shock protein, mitochondrial;cDNA FLJ51028, highly similar to 60 kDa heat shock protein, mitochondrial;cDNA FLJ54373, highly similar to 60 kDa hea…	IPI00784154;IPI00917575;IPI00880053;IPI00917983;IPI00915941;IPI00916653;IPI00076042;IPI00916167;IPI00954209;IPI00917789	IPI00784154;IPI00917575	HSP60;HSPD1	P10809;B3GQS7;B7Z4F6;B7Z532;B7Z597;Q53QD5;Q96RI4;B7Z5E7;C9JCQ4	0.0781994		-1.04649	-0.933849	-0.572696	-1.63292	0.484145	0.175608	0.52346	0.672359	0.322435	80	74	49	61.054	573	80.3	88.5	64.7	150.67	153.75	112.77	144.28	123.51	51.732	114.35	135.47	107.77	188.58	163.48	35.258	1215700000	10803000000	2913800000	1052300000	8526000000	16372000000	1144700000	8238400000	9658700000
60 kDa poly(U)-binding-splicing factor;FUSE-binding protein-interacting repressor;Poly(U)-binding-splicing factor PUF60;Ro-binding protein 1;Siah-binding protein 1	IPI00855912;IPI00100716;IPI00856076;IPI00788826;IPI00069750;IPI00797595	IPI00855912;IPI00100716;IPI00856076;IPI00788826;IPI00069750;IPI00797595	FIR;PUF60;ROBPI;SIAHBP1	Q9UHX1-6;Q9UHX1;Q9UHX1-2;Q9UHX1-5;Q9UHX1-4;Q9UHX1-1;Q9UHX1-3	0.943472		0.0168828	-0.0655365	-0.300065	0.41625	1.01177	0.269823	0.95559	0.812216	1.33445	7	3	4	55.399	513	22.4	10.9	9.9	114.12	108.58	51.193	133.18	91.15	23.991	116.6	139.96	65.476	39.686	53.988	19.445	27774000	167700000	43345000	27342000	145740000	156480000	16072000	15742000	25355000
60 kDa SS-A/Ro ribonucleoprotein;Ro 60 kDa autoantigen;Sjoegren syndrome antigen A2;Sjoegren syndrome type A antigen;TROVE domain family member 2;Gastric cancer multi-drug resistance protein variant;TROVE domain family, member 2;TROVE domain family, member 2, isoform CRA_c;TROVE domain family, member 2, isoform CRA_e;TROVE domain family, member 2, isoform CRA_d	IPI00019450;IPI00646322;IPI00646813;IPI00642416;IPI00642895;IPI00219287;IPI00760707	IPI00019450;IPI00646322;IPI00646813;IPI00642416;IPI00642895	RO60;SSA2;TROVE2;hCG_41054;RP11-101E13.3-005;RP11-101E13.3-006;RP11-101E13.3-003;RP11-101E13.3-004	P10155-1;P10155;Q86WL3;Q5LJ99;Q5LJA0;Q86WL4;Q5LJ98;Q5LJ97	0.0362643	+	1.01525	1.32297	0.643383	1.07939	2.02125	0.472242	2.5018	1.56199	2.11314	11	13	7	60.67	538	24	25.3	15.1	118.1	114.15	98.924	104.81	76.342	19.156	78.884	99.276	27.144	117.84	89.183	52.576	12919000	62496000	48197000	17682000	155520000	115570000	12663000	5124400	8870200
600 kDa retinoblastoma protein-associated factor;E3 ubiquitin-protein ligase UBR4;N-recognin-4;Retinoblastoma-associated factor of 600 kDa;Zinc finger UBR1-type protein 1	IPI00746934;IPI00843999;IPI00640981;IPI00646605;IPI00180305;IPI00942028;IPI00942168;IPI00514902;IPI00386907	IPI00746934;IPI00843999;IPI00640981;IPI00646605	KIAA0462;KIAA1307;RBAF600;UBR4;ZUBR1	Q5T4S7-2;Q5T4S7;Q5T4S7-1;Q5T4S7-4;Q5T4S7-3	0.40513		0.173779	0.154454	-0.103665	0.470549	1.12801	0.228974	1.113	0.930665	1.38564	18	9	2	575.95	5204	5.1	2.7	0.4	128.44	108.31	102.63	168.67	105.61	197.31	40.009	39.906	24.867	174.47	93.436	0.52513	8809400	24497000	12644000	5321700	33912000	31613000	3224100	2778300	12736000
60S acidic ribosomal protein P0;60S ribosomal protein L10E;cDNA FLJ75549, highly similar to Homo sapiens ribosomal protein, large, P0 (RPLP0), transcript variant 1, mRNA;Ribosomal protein P0 variant;RPLP0 protein;cDNA FLJ51469, highly similar to 60S acidic ribosomal protein P0;60S acidic ribosomal protein P0-like	IPI00008530;IPI00556485;IPI00791448;IPI00794884;IPI00793002;IPI00791188;IPI00871646;IPI00797741;IPI00868999;IPI00790287;IPI00798371;IPI00940411	IPI00008530;IPI00556485;IPI00791448;IPI00794884;IPI00793002;IPI00791188;IPI00871646;IPI00797741;IPI00868999;IPI00790287	RPLP0	P05388;A8K4Z4;Q53HK9;Q53HW2;Q3B7A4;Q6NSF2;B4E3D5;Q3MHV2;Q8NHW5	0.868104		-0.0428389	-0.190816	-0.341758	0.404057	0.970743	0.286588	0.87611	0.789079	1.32322	18	12	15	34.273	317	55.2	45.1	49.8	70.936	79.064	36.858	70.686	66.5	34.938	30.324	42.034	32.16	75.322	143.94	23.071	25831000	122740000	50988000	26600000	94391000	170200000	9635700	77807000	64896000
60S ribosomal protein L1;60S ribosomal protein L4;cDNA FLJ56689, highly similar to 60S ribosomal protein L4;Ribosomal protein L4 variant;cDNA FLJ50996, highly similar to 60S ribosomal protein L4;cDNA FLJ50994, moderately similar to 60S ribosomal protein L4	IPI00003918;IPI00795303;IPI00908662;IPI00878133;IPI00908376;IPI00792159;IPI00793341;IPI00953651;IPI00794736;IPI00794087;REV__IPI00888854;REV__IPI00886949;REV__IPI00909463	IPI00003918;IPI00795303;IPI00908662	RPL1;RPL4	P36578;B4DFI6;Q53G74;Q59GY2;B4DMJ6;B4DMJ2	0.304344		-0.255791	-0.626669	-0.109026	-0.0316775	0.837528	0.177978	0.64767	0.927214	0.978282	35	30	16	47.697	427	63.9	63.5	35.1	143.33	126.5	109.01	128.27	123.72	85.101	111.9	96.666	121.99	174.68	110.11	67.209	62272000	355480000	101160000	195490000	475540000	599650000	118440000	1227200000	750600000
60S ribosomal protein L10a;CSA-19;Neural precursor cell expressed developmentally down-regulated protein 6;Ribosomal protein L1	IPI00412579;IPI00413986;IPI00478277;IPI00940624	IPI00412579	NEDD6;RPL10A	P62906;Q1JQ76	0.570327		-0.316875		-0.712816	0.0790665	0.802807	0.315515		0.610128	1.05633	0	10	13	24.831	217	0	44.2	54.4	132.81	120.1	43.928				53.977	100.66	98.888	200.82	128.88	32.294	0	0	0	43104000	150220000	154510000	11113000	152020000	93686000
60S ribosomal protein L11;CLL-associated antigen KW-12;Cell growth-inhibiting protein 34;cDNA, FLJ92077, Homo sapiens ribosomal protein L11 (RPL11), mRNA;Ribosomal protein L11;Ribosomal protein L11, isoform CRA_b	IPI00376798;IPI00746438;IPI00647674;IPI00647168;IPI00878431	IPI00376798;IPI00746438;IPI00647674;IPI00647168	RPL11;hCG_1739238;RP11-223J15.3-001;RP11-223J15.3-005;RP11-223J15.3-004	P62913-1;P62913;Q08ES8;Q5VVD0;P62913-2;Q5VVC8;Q5VVC9	0.273124		1.83329		2.6719	0.994672	3.56348	3.09716		6.37267	1.99263	0	6	1	20.252	178	0	38.2	8.4	102.95	129.86	129.6				76.839	136.94	132.59				0	0	0	9019600	6149400	13831000	106050	253880	306340
60S ribosomal protein L12;Ribosomal protein L12 variant	IPI00024933;IPI00816063;IPI00868816	IPI00024933;IPI00816063	RPL12	P30050-1;P30050;Q59FI9;P30050-2	0.359455		0.84683		1.38323	0.310432	1.79855	0.96763		2.60851	1.24008	0	2	2	17.818	165	0	14.5	10.3	99.08	91.761	78.677				69.597	67.643	81.191	72.421	66.976	44.405	0	0	0	4100700	14595000	4932000	13113000	10987000	27047000
60S ribosomal protein L13;Breast basic conserved protein 1;Ribosomal protein L13	IPI00465361	IPI00465361	BBC1;OK/SW-cl.46;RPL13;hCG_1723872	P26373;A8K4C8;B4DLX3;O60250;Q6NZ55	0.377669		0.233173	-0.179089	0.39994	0.478668	1.17542	0.275693	0.88326	1.31945	1.39346	1	14	12	24.261	211	5.2	47.4	50.2	130.6	118.84	70.273				51.364	86.406	82.495	179.23	121.6	38.245	4801.1	33986	5715.8	48271000	175550000	151200000	21376000	132280000	99992000
60S ribosomal protein L14;CAG-ISL 7;cDNA FLJ76611, highly similar to Homo sapiens ribosomal protein L14 (RPL14), mRNA;cDNA FLJ75556, highly similar to Homo sapiens ribosomal protein L14, mRNA;Ribosomal protein L14 variant;RPL14 protein;cDNA FLJ51325, highly similar to 60S ribosomal protein L14;Putative uncharacterized protein ENSP00000350479	IPI00555744;IPI00925323;IPI00069693;IPI00815843	IPI00555744;IPI00925323;IPI00069693;IPI00815843	RPL14	P50914;A8K3Q9;A8K7N0;Q6IPH7;B7Z6S8;A6NIH1;A0PJ62	0.995621		0.000872999		-0.126048	0.127794	1.00061	0.124651		0.916338	1.09262	1	13	15	23.787	220	4.5	49.1	48.2	158.4	143.43	64.045				83.463	111.08	90.801	255.66	179.24	28.778	0	39435	0	45853000	122540000	132070000	23676000	105910000	58690000
60S ribosomal protein L15;Ribosomal protein L15	IPI00470528;IPI00790569;IPI00909437;IPI00927715;IPI00926202;IPI00943200;IPI00925058;IPI00910417;IPI00874178;IPI00062151	IPI00470528;IPI00790569;IPI00909437;IPI00927715;IPI00926202	EC45;RPL15;TCBAP0781;hCG_1996483	P61313;Q5U0C0;B4DLP4	0.582826		-0.155658	0.164014	-0.625083	-0.00590296	0.897723	0.244635	1.1204	0.648382	0.995917	1	7	5	24.146	204	4.4	28.4	13.7	106.73	110.7	60.997				88.605	105.98	88.737	144.07	107.66	31.049	98139	388960	383680	13141000	48018000	55024000	3895800	9303100	28236000
60S ribosomal protein L18;Ribosomal protein L18	IPI00215719;IPI00908950	IPI00215719;IPI00908950	RPL18	Q07020;Q0QEW2;B4DDY5	0.316926		-0.218539		-0.337311	-0.0997665	0.859435	0.100175		0.791515	0.933184	0	10	8	21.634	188	0	49.5	41.5	134.91	120.4	75.811				53.718	70.179	110.07	252.13	119.18	48.505	0	0	0	35366000	127520000	132660000	12812000	47357000	116940000
60S ribosomal protein L18a;cDNA, FLJ92035, highly similar to Homo sapiens ribosomal protein L18a (RPL18A), mRNA;cDNA FLJ52166, highly similar to 60S ribosomal protein L18a;Ribosomal protein L18a variant;Ribosomal protein L18a;cDNA FLJ51501, highly similar to 60S ribosomal protein L18a;Ribosomal protein L18a-like protein;cDNA FLJ51502, highly similar to 60S ribosomal protein L18a	IPI00026202;IPI00847774;IPI00872093;IPI00909746;IPI00878506	IPI00026202;IPI00847774;IPI00872093;IPI00909746	RPL18A	Q02543;B2R4C0;B4DUV3;Q53HD3;Q76N54;B4DM74;Q32XH3;B4DM94	0.835928		0.152515		0.731134	-0.426104	1.11151	0.64748		1.65994	0.744269	0	8	1	20.762	176	0	39.2	5.7	103.21	96.457	140.91				42.4	83.294	97.155	326.81	124.7	5.91	0	0	0	4469000	32565000	20757000	6104000	35069000	3124800
60S ribosomal protein L19;Ribosomal protein L19	IPI00025329;IPI00175212;REV__IPI00291306;REV__IPI00952773;REV__IPI00216356;REV__IPI00011665	IPI00025329;IPI00175212	RPL19	P84098;Q53G49;Q8IWR8	0.494556		0.196743		0.00333648	0.39015	1.14611	0.217941		1.00232	1.31053	0	12	10	23.466	196	0	34.7	28.6	130.35	120.66	54.971				98.432	131.07	90.237	232.35	152.89	45.594	0	0	0	19867000	120290000	106470000	7602900	49570000	37383000
60S ribosomal protein L21;cDNA, FLJ92056, Homo sapiens ribosomal protein L21 (RPL21), mRNA;Ribosomal protein L21;Ribosomal protein L21, isoform CRA_a;RPL21 protein;Putative uncharacterized protein ENSP00000404254	IPI00247583;IPI00940766;IPI00879165;IPI00845507;IPI00397713;IPI00399374;IPI00402362	IPI00247583;IPI00940766;IPI00879165	RPL21;hCG_2020044;RP11-428O18.5-001	P46778;Q6IAX2;C9JHA8	0.435684		1.72699		3.13606	0.317912	3.31036	5.3349		8.79121	1.24653	0	6	1	18.565	160	0	30.6	11.2	128.46	123.18	133.82				99.683	59.072	149.34				0	0	0	1914500	4194000	2303200	80484	708760	1594300
60S ribosomal protein L23a;Putative uncharacterized protein RPL23A;Ribosomal protein L23a, isoform CRA_a;Putative uncharacterized protein	IPI00176755;IPI00021266;IPI00789159;IPI00793523;IPI00794894;IPI00923578;IPI00788093;IPI00397695;IPI00293431;IPI00878216	IPI00176755;IPI00021266;IPI00789159;IPI00793523;IPI00794894;IPI00923578	RPL23A;hCG_1988529	C9JGG2;P62750;A8MUS3;A8MXA8;C9JSM9;B9EJE3	0.41804		1.7355		3.07315	0.397847	3.32995	5.01943		8.41609	1.31754	0	2	2	17.707	156	0	17.9	17.9	156.64	154.68	68.065							206.48	179.08	39.618	0	0	0	103770	835000	176110	5395200	7451900	17499000
60S ribosomal protein L24;60S ribosomal protein L30	IPI00306332;IPI00795548	IPI00306332	RPL24	P83731	0.509621		0.801339	-0.770683	2.6777	0.496997	1.74272	3.14467	0.58614	6.39836	1.41127	1	3	3	17.779	157	8.3	16.6	14.6	175.76	149.5	110.07				72.41	84.514	142.74	318.63	122.04	177.95	63362	41105	50163	3185800	3569600	1718200	433120	690410	2257200
60S ribosomal protein L3;HIV-1 TAR RNA-binding protein B;Ribosomal protein L3;Putative uncharacterized protein RPL3;cDNA FLJ35376 fis, clone SKMUS2004044, highly similar to Homo sapiens ribosomal protein L3 (RPL3), transcript variant 2, mRNA;cDNA FLJ59135, highly similar to 60S ribosomal protein L3;Ribosomal protein L3, isoform CRA_i;Ribosomal protein L3, isoform CRA_b;RPL3 protein;Putative uncha…	IPI00550021;IPI00651660;IPI00941779;IPI00877635;IPI00877787;IPI00877999;IPI00889059;IPI00878524;IPI00219335;IPI00878827;IPI00943250	IPI00550021;IPI00651660;IPI00941779;IPI00877635;IPI00877787;IPI00877999	OK/SW-cl.32;RPL3;hCG_2015191;rpl3	P39023;Q96QL0;A6NHB7;B3KS36;B4DN06;Q49AJ9;Q8TBW1;Q9BT63;Q9NY85;B5MCW2;C9JFX8	0.886458		-0.0568262	-0.759185	0.324419	0.264287	0.961377	0.367951	0.59083	1.25216	1.20104	25	25	19	46.108	403	46.9	44.2	46.9	111.21	109.08	51.062	104.58	97.51	44.579	83.428	85.118	65.775	195.19	161.56	24.272	38113000	109600000	67168000	62737000	185850000	240180000	38995000	165710000	235310000
60S ribosomal protein L5;cDNA, FLJ95579, Homo sapiens ribosomal protein L5 (RPL5), mRNA;Ribosomal protein L5;Ribosomal protein L5, isoform CRA_c;cDNA FLJ38496 fis, clone FELIV1000137, highly similar to 60S RIBOSOMAL PROTEIN L5;Ribosomal protein L5, isoform CRA_b;Ribosomal protein L5 variant;Ribosomal protein L5, isoform CRA_a;RPL5 protein	IPI00000494;IPI00640037	IPI00000494	MSTP030;RPL5;hCG_2028912	P46777;A2RUM7;B3KTM6;Q59GX9;Q8WYP1;Q9BUV4	0.340376		-0.52121	-0.972308	-0.909197	0.317876	0.696787	0.41897	0.50969	0.532481	1.24649	22	18	23	34.362	297	50.8	58.6	65	107.25	101.74	47.296	147.39	78.926	42.287	73.135	86.068	49.217	173.41	174.71	19.598	3402200	24958000	8486500	116870000	220710000	201690000	20840000	217160000	190210000
60S ribosomal protein L6;Neoplasm-related protein C140;Tax-responsive enhancer element-binding protein 107	IPI00790342;IPI00329389;IPI00867533;IPI00789282;IPI00797034;IPI00880154	IPI00790342;IPI00329389;IPI00867533	RPL6;TXREB1	B2R4K7;Q9HBB3;Q02878;B4DRX3;Q8N5Z7;Q8TBK5	0.430674		-0.450932	-1.34381	-0.199625	0.190635	0.73157	0.37836	0.39398	0.870777	1.14127	18	18	13	32.872	289	43.3	50.5	40.1	121.05	111.59	62.385	146.87	84.962	72.573	61.369	94.454	90.104	208.49	150.49	48.254	9781400	34396000	19698000	54003000	192960000	241690000	33785000	139210000	133130000
60S ribosomal protein L7;Putative uncharacterized protein RPL7	IPI00472171;IPI00030179;IPI00871827;IPI00872387;IPI00794746;IPI00940164;IPI00941488;IPI00878826;IPI00790291;IPI00793342;IPI00945122;IPI00008944;IPI00470716;IPI00797636;REV__IPI00642814	IPI00472171;IPI00030179;IPI00871827;IPI00872387;IPI00794746	RPL7	P18124;A8MVV7;A8MY04;A8MUD9	0.692015		0.245925	1.28995	-0.495593	-0.0565835	1.18585	0.937936	2.4452	0.70927	0.961538	1	16	15	30.438	259	4.2	49	45.6	128.55	132.1	76.05				82.666	125.64	128.06	205.92	182.27	27.288	141290	89514	170500	109320000	381320000	407990000	15068000	121370000	94846000
60S ribosomal protein L7a;PLA-X polypeptide;Surfeit locus protein 3;cDNA FLJ78489, highly similar to Homo sapiens ribosomal protein L7a (RPL7A), mRNA;cDNA, FLJ92002, Homo sapiens ribosomal protein L7a (RPL7A), mRNA;Ribosomal protein L7a;Ribosomal protein L7a, isoform CRA_c	IPI00299573;IPI00397676;IPI00478896;IPI00642454;REV__IPI00552413;REV__IPI00301923	IPI00299573;IPI00397676;IPI00478896	RPL7A;SURF3;SURF-3;hCG_2032998;RP11-244N20.10-009;RP11-244N20.10-004	P62424;Q5T8U4;Q5T8U3	0.22971		-0.61457	-1.30297	-0.451646	-0.0890913	0.653124	0.269537	0.40529	0.731208	0.940115	7	25	21	29.995	266	19.9	63.9	51.1	125.15	130.97	64.408	23.616	44.488	27.486	70.98	140.43	118.46	192.65	155.59	31.91	359760	2339700	451440	64944000	257780000	245970000	16935000	118510000	120130000
60S ribosomal protein L7-like 1;cDNA FLJ77818;cDNA FLJ11842 fis, clone HEMBA1006652, highly similar to Ribosomal protein L7-like 1;cDNA FLJ51993, highly similar to Ribosomal protein L7-like 1;cDNA FLJ50850, highly similar to Ribosomal protein L7-like 1	IPI00456940	IPI00456940	RPL7L1	Q6DKI1;A8K5J5;B3KMP5;B7Z4G0;B7Z652	0.0840949		-1.54729		-1.3417	-1.75288	0.342152	0.0691873		0.394555	0.296709	0	3	1	28.661	246	0	12.6	2.4	112.1	155.27	98.588				44.353	24.882	15.962				0	0	0	1372600	9789700	4903900	600200	3500300	1272600
60S ribosomal protein L8;cDNA FLJ53750, highly similar to 60S ribosomal protein L8	IPI00012772;IPI00797230;IPI00795138;IPI00909884;IPI00792050;IPI00795853	IPI00012772;IPI00797230;IPI00795138;IPI00909884;IPI00792050;IPI00795853	RPL8	P62917;B4DVG7	0.325479		-0.238816	-0.603709	-0.107554	-0.00518438	0.847441	0.17893	0.65806	0.92816	0.996413	15	14	16	28.024	257	30.7	36.2	39.7	126.55	128.71	85.43	158.47	98.869	56.883	71.937	125.9	140.11	201.54	149	45.181	1585500	17279000	3107500	51628000	116720000	102400000	22148000	102440000	122740000
60S ribosomal protein L9;cDNA, FLJ92535, Homo sapiens ribosomal protein L9 (RPL9), mRNA;NPC-A-16;Ribosomal protein L9;Ribosomal protein L9 isoform;Ribosomal protein L9, isoform CRA_b;cDNA FLJ51990, highly similar to 60S ribosomal protein L9;Ribosomal protein L9, isoform CRA_d;cDNA FLJ52179, highly similar to 60S ribosomal protein L9	IPI00031691;IPI00795717;IPI00910195;IPI00909133;IPI00795310;IPI00719047;IPI00789747;IPI00878105	IPI00031691;IPI00795717;IPI00910195;IPI00909133	OK/SW-cl.103;RPL9;RPL9P7;RPL9P8;RPL9P9;hCG_37461	P32969;Q53Z07;B4DLV8;B4E1M5	0.39541		-0.187716		-0.0533894	-0.322044	0.877994	0.115777		0.96367	0.799936	0	10	3	21.863	192	0	40.6	20.8	85.865	80.841	54.675				64.112	90.549	75.73	210.08	72.293	92.17	0	0	0	6304800	27980000	41870000	1809900	15739000	10592000
62 kDa nucleoporin;Nuclear pore glycoprotein p62;Nucleoporin Nup62;Putative uncharacterized protein pp7052	IPI00293533;IPI00553162;IPI00300542;IPI00644100	IPI00293533	NUP62;pp7052	P37198;Q8WYU3	0.104031		-1.0928	-0.709906	-1.85886	-0.709644	0.46885	0.193829	0.61136	0.275695	0.611471	5	2	1	53.254	522	12.5	3.4	2.1	100.12	116.12	93.912	119.53	115.68	40.863	63.439	22.911	44.707				6055800	13792000	12354000	3228800	11048000	13878000	2464000	1379200	8822700
620 kDa actin-binding protein;Actin cross-linking family protein 7;Macrophin-1;Microtubule-actin cross-linking factor 1, isoforms 1/2/3/5;Trabeculin-alpha;ACF7 protein;Microtubule-actin crosslinking factor 1;cDNA FLJ58849, highly similar to Microtubule-actin crosslinking factor 1, isoform 4;MACF1 protein;cDNA FLJ46776 fis, clone TRACH3026650, highly similar to Actin cross-linking family protein 7	IPI00256861;IPI00550385;IPI00478226;IPI00941241;IPI00444397;IPI00640975;IPI00165470;IPI00908583;IPI00747958;IPI00872730	IPI00256861;IPI00550385;IPI00478226;IPI00941241	ABP620;ACF7;KIAA0465;KIAA1251;MACF1;RP11-69E11.1-010;RP11-69E11.1-003	Q9UPN3-2;Q9UPN3;Q13696;Q9UPN3-1;B1ALC6;B1ANR6;B4DNC4;Q6IPG6;Q6ZQZ4;Q9UPN3-4;B1ALC4;B1ANR3;B1AP66	0.287944		-0.484192	-0.175355	-1.1586	-0.118626	0.714897	0.263501	0.88555	0.447948	0.921065	57	28	2	620.41	5430	13.4	6.9	0.4	102.05	104.7	44.817	91.173	101.92	55.999	88.311	89.059	23.1	236.97	193.34	105.83	17451000	32998000	35460000	38230000	72274000	34181000	18996000	68465000	3709600
63 kDa FK506-binding protein;FK506-binding protein 9;Peptidyl-prolyl cis-trans isomerase FKBP9;Rotamase;FKBP9 protein;cDNA PSEC0007 fis, clone NT2RM1000634, highly similar to FK506-binding protein 9 (EC 5.2.1.8);cDNA FLJ55188, highly similar to FK506-binding protein 9 (EC 5.2.1.8);cDNA FLJ53831, highly similar to FK506-binding protein 9 (EC 5.2.1.8);cDNA FLJ53833, highly similar to FK506-binding …	IPI00182126;IPI00922428;IPI00878142;IPI00645860;IPI00953596;IPI00555592	IPI00182126;IPI00922428;IPI00878142	FKBP60;FKBP63;FKBP9	O95302;A7YQ73;B3KQQ0;B7Z1G9;B7Z1U8;B7Z230;B7Z994;B7ZAH5;B7Z6H3	0.0898589		0.824292	1.34965	0.626313	0.496916	1.77067	0.621932	2.5485	1.54361	1.41119	3	5	3	63.083	570	5.1	7.5	5.3	70.277	73.243	56.865	25.547	13.839	46.803	64.492	67.935	9.3034	59.319	102.76	24.062	695940	3768200	2023300	3170300	50899000	25433000	1117000	5540900	2421400
63 kDa membrane protein;Cytoskeleton-associated protein 4;cDNA FLJ41699 fis, clone HCHON2004776, highly similar to Homo sapiens cytoskeleton-associated protein 4 (CKAP4), mRNA;CKAP4 protein;Similar to cytoskeleton-associated protein 4	IPI00141318;IPI00604713;IPI00939370;IPI00883950;IPI00796152;IPI00953333;IPI00102875;IPI00555885;IPI00790467	IPI00141318;IPI00604713;IPI00939370;IPI00883950	CKAP4	Q07065-1;Q07065;Q07065-2;B3KVX6;Q6NWZ1;Q8TB01	0.0436825	+	0.983742	0.586404	1.31369	1.05113	1.97759	0.494218	1.5015	2.48577	2.07215	43	52	32	66.022	602	69.6	79.7	54.3	108.08	100.28	64.713	76.472	48.975	36.619	83.032	105.48	71.879	141.93	102.67	39.694	111610000	325500000	147470000	393120000	866200000	565120000	112930000	226560000	231490000
65 kDa FK506-binding protein;FK506-binding protein 10;Immunophilin FKBP65;Peptidyl-prolyl cis-trans isomerase FKBP10;Rotamase;Putative uncharacterized protein DKFZp666D193;cDNA FLJ23972 fis, clone HEP18230, highly similar to 65 kDa FK506-binding protein (EC 5.2.1.8);cDNA FLJ53423, highly similar to FK506-binding protein 10 (EC 5.2.1.8);cDNA FLJ35389 fis, clone SKNMC2000635, moderately similar to …	IPI00303300;IPI00909121;IPI00334818;IPI00184854;IPI00794022;IPI00893514;IPI00095870	IPI00303300;IPI00909121;IPI00334818	FKBP10;FKBP65;PSEC0056;DKFZp666D193	Q96AY3;Q658U4;Q6ZME7;B4DJJ5;Q8NAG5	0.0974168		0.253661	0.120617	0.413365	0.227	1.19223	0.12436	1.0872	1.33179	1.1704	10	12	8	64.244	582	18.6	21.8	14.4	92.156	87.82	55.761	35.977	63.104	46.07	49.497	50.926	17.226	173.62	138.5	33.188	18490000	37219000	31287000	8499800	32521000	30922000	2586000	4739400	4197200
66 kDa neurofilament protein;Alpha-internexin;Neurofilament 5;cDNA FLJ57501, highly similar to Alpha-internexin;Internexin neuronal intermediate filament protein, alpha variant	IPI00001453	IPI00001453	INA;NEF5	Q16352;B4DE66;Q59EM6	0.124207		3.30582	5.8583	2.33461	1.72456	9.889	31.0958	58.013	5.04414	3.3048	33	11	7	55.39	499	63.7	23.8	18.2	213.17	191.87	315.76	140.96	133.9	52.616	63.661	70.017	74.245	135.56	116.06	53.044	58361000	85590000	85390000	11487000	15480000	26757000	5761000	5308500	6505400
67 kDa calelectrin;Annexin A6;Annexin VI;Annexin-6;Calphobindin-II;Chromobindin-20;Lipocortin VI;p68;p70;Protein III;cDNA FLJ75116, highly similar to Homo sapiens annexin A6, transcript variant 1, mRNA;cDNA FLJ53638, highly similar to Annexin A6;cDNA FLJ53686, highly similar to Annexin A6;cDNA FLJ26567 fis, clone LNF05260, highly similar to Annexin VI	IPI00221226;IPI00442825	IPI00221226;IPI00442825	ANX6;ANXA6	P08133;A8K3Q7;B7Z582;B7Z8A7;Q6ZP35	0.00174733	+	2.74352	2.52281	2.79887	2.90888	6.69701	0.902048	5.747	6.95894	7.51033	34	61	56	75.872	673	54.2	81.4	77.6	133.89	127.65	172.32	132.61	76.559	32.995	73.178	91.123	57.387	168.16	139.91	82.745	178790000	222430000	229030000	253240000	1308100000	328380000	136260000	227200000	180020000
68 kDa TATA-binding protein-associated factor;RNA-binding protein 56;TATA-binding protein-associated factor 2N;cDNA, FLJ94920, Homo sapiens TAF15 RNA polymerase II, TATA box binding protein(TBP)-associated factor, 68kDa (TAF15), transcript variant 1, mRNA;TAF15 RNA polymerase II, TATA box binding protein (TBP)-associated factor, 68kDa;TAF15 RNA polymerase II, TATA box binding protein (TBP)-associ…	IPI00294426;IPI00020194	IPI00294426;IPI00020194	RBP56;TAF15;TAF2N;hCG_1992163	Q92804-1;Q92804;Q86X94;Q92804-2;B4E312	0.893413		-0.06615	0.1038	-0.89243	0.59018	0.955184	0.484315	1.0746	0.538706	1.50543	7	7	10	61.829	592	23.8	21.8	25.2	127.94	125.22	44.039	123.69	63.356	43.447	81.507	106.17	15.116	172.03	159.58	44.127	19728000	31774000	31783000	45868000	60358000	21846000	590180	6718200	4993200
6-phosphofructokinase type C;6-phosphofructokinase, platelet type;Phosphofructo-1-kinase isozyme C;Phosphofructokinase 1;Phosphohexokinase;cDNA FLJ35278 fis, clone PROST2006579, highly similar to 6-phosphofructokinase type C (EC 2.7.1.11);Phosphofructokinase-P;PFKP protein;Phosphofructokinase, platelet;Similar to phosphofructokinase, platelet	IPI00009790;IPI00643196;IPI00639981;IPI00642664;IPI00552290;IPI00645848;IPI00552617;IPI00646468	IPI00009790;IPI00643196	PFKF;PFKP;PFK-P;RP11-298E9.2-004	Q01813;Q5VSR8;B3KS15;O14943;Q49A78;Q5VSR7;Q8WTZ9	0.0100386	+	2.23433	1.87204	2.18266	2.64828	4.70543	1.32723	3.6605	4.53988	6.2692	22	39	34	85.595	784	29.7	48.3	39.4	135.4	129.57	137.32	78.899	75.654	23.367	108.9	116.6	42.61	183.4	130.14	79.086	46013000	80788000	164750000	122370000	492640000	377480000	90574000	123900000	191100000
6-phosphofructokinase, liver type;Phosphofructo-1-kinase isozyme B;Phosphofructokinase 1;Phosphohexokinase;cDNA FLJ30173 fis, clone BRACE2000969, highly similar to 6-phosphofructokinase, liver type (EC 2.7.1.11);cDNA FLJ61026, highly similar to Homo sapiens phosphofructokinase, liver (PFKL), transcript variant 1, mRNA;Putative uncharacterized protein DKFZp686L2097;PFKL protein;Putative uncharacte…	IPI00332371;IPI00925520;IPI00940003;IPI00916281;IPI00784216	IPI00332371;IPI00925520	PFKL;DKFZp686L2097;DKFZp686G1648	P17858-1;P17858;B3KNQ7;B4E108;Q6MZK4;Q7L2M7;Q7Z3R9;Q9BSP4;P17858-2	0.153315		0.66455	0.299127	0.445421	1.2491	1.58507	0.62749	1.2304	1.36171	2.37693	12	9	9	85.018	780	21.4	13.6	13.6	160.5	170.65	102.96	142.17	103.09	32.596	136.08	172.39	61.978	167.32	97.132	38.962	16952000	28112000	25787000	15640000	66539000	44922000	38765000	214080000	44698000
6-phosphofructokinase, muscle type;Phosphofructo-1-kinase isozyme A;Phosphofructokinase 1;Phosphohexokinase;cDNA FLJ56281, highly similar to 6-phosphofructokinase, muscle type (EC 2.7.1.11);cDNA FLJ44241 fis, clone THYMU3008436, highly similar to 6-phosphofructokinase, muscle type (EC 2.7.1.11);PFKM protein;Phosphofructokinase	IPI00743142;IPI00465179;IPI00219585;IPI00793665;IPI00796852;IPI00385347;IPI00797580;IPI00791170;REV__IPI00797580;REV__IPI00256233;REV__IPI00329279	IPI00743142;IPI00465179;IPI00219585;IPI00793665	PFKM;PFKX	P08237-1;P08237;B4E162;Q6ZTT1;P08237-2;Q96I60;Q7KYX9	0.00459712	+	2.47947	2.81011	2.37228	2.25601	5.57692	1.1926	7.0134	5.17759	4.77669	12	24	16	85.182	780	18.2	36.5	26.3	140.39	146.58	173.65	117.78	85.164	25.185	98.024	105.15	31.035	190.81	180.79	114.47	8266200	42366000	32394000	46791000	57270000	73127000	48967000	23947000	37793000
6-phosphogluconate dehydrogenase, decarboxylating	IPI00219525;IPI00943153;IPI00910950;IPI00935244	IPI00219525;IPI00943153	PGD;PGDH;hCG_2006054;RP4-736L20.2-001	P52209;A8K2Y9;B4DQJ8;B4DV68;B4E2U0;B4DL86	0.0456807	+	1.00468	1.32406	0.57682	1.11316	2.0065	0.515019	2.5037	1.49156	2.16319	10	12	8	53.139	483	26.3	30.4	19.7	108.5	119.36	106.17	100.65	116.81	20.793	56.358	88.802	71.36	156.51	128.46	41.982	30651000	109910000	127800000	57888000	183230000	168280000	41968000	89557000	115860000
6-phosphogluconolactonase	IPI00029997;IPI00643842;IPI00167560;IPI00895778	IPI00029997	PGLS	O95336	0.131252		2.06466		1.63285	2.49647	4.18335	1.7973		3.10126	5.64302	0	10	12	27.547	258	0	50.8	56.6	115.35	118.9	156.21				39.964	87.037	65.053	148.93	119.7	44.78	0	0	0	7896900	31590000	27904000	27991000	39277000	51544000
70 kDa lamin;Lamin-A/C;Renal carcinoma antigen NY-REN-32;Lamin A/C transcript variant 1;Lamin A/C;Progerin;cDNA FLJ56081, highly similar to Lamin-A/C	IPI00021405;IPI00216953;IPI00644087;IPI00514204;IPI00910241;REV__IPI00514111	IPI00021405;IPI00216953;IPI00644087;IPI00514204;IPI00910241	LMN1;LMNA;RP11-54H19.1-004;RP11-54H19.1-003	P02545-1;P02545;Q5I6Y4;Q5I6Y6;P02545-3;Q6UYC3;Q5TCJ4;B4DI32	0.270173		-0.698577	-0.91289	-1.37106	0.188217	0.61618	0.399471	0.53112	0.386608	1.13935	55	54	46	74.139	664	68.5	69.1	58.6	116.37	173.99	195.48	110.57	72.402	56.148	64.391	71.552	60.299	129	85.362	47.914	315500000	325490000	95216000	400660000	218190000	508280000	97065000	135720000	148480000
70 kDa lysosomal alpha-glucosidase;76 kDa lysosomal alpha-glucosidase;Acid maltase;Aglucosidase alfa;Lysosomal alpha-glucosidase	IPI00293088	IPI00293088	GAA	P10253	0.130101		0.987577	0.208892	1.50165	1.25219	1.98285	0.867401	1.1558	2.83166	2.38203	10	12	8	105.32	952	14	16	14	75.648	84.746	135.85	35.237	38.5	8.6782	48.165	30.353	31.184				3861500	9280700	7109000	1670200	7366600	10990000	97635	479650	374000
70 kDa mitochondrial autoantigen of primary biliary cirrhosis;Dihydrolipoamide acetyltransferase component of pyruvate dehydrogenase complex;Dihydrolipoyllysine-residue acetyltransferase component of pyruvate dehydrogenase complex, mitochondrial;M2 antigen complex 70 kDa subunit;Pyruvate dehydrogenase complex component E2;cDNA FLJ50978, highly similar to Dihydrolipoyllysine-residue acetyltransfer…	IPI00021338;IPI00788836;IPI00908638	IPI00021338;IPI00788836	DLAT;DLTA	P10515;B4DJX1;B4DS43;Q16791;Q86YI5;B4DLQ2;Q01991;Q9HAN0	0.00295305	+	-0.395367	-0.383623	-0.437121	-0.365357	0.760296	0.0195491	0.76651	0.738607	0.776277	19	19	17	68.996	647	25.3	33.1	21.8	119.86	104.64	70.358	111.13	86.366	27.67	48.837	96.499	72.169	155.79	136.73	51.262	40979000	86645000	122050000	30164000	166400000	109260000	7558300	24070000	20854000
70 kDa subunit of Ku antigen;ATP-dependent DNA helicase 2 subunit 1;ATP-dependent DNA helicase II 70 kDa subunit;CTC box-binding factor 75 kDa subunit;DNA repair protein XRCC6;Lupus Ku autoantigen protein p70;Thyroid-lupus autoantigen;X-ray repair complementing defective repair in Chinese hamster cells 6;X-ray repair cross-complementing protein 6;cDNA, FLJ96699, highly similar to Homo sapiens thy…	IPI00644712;IPI00889791;IPI00893062;IPI00893179;IPI00909441;IPI00216710;IPI00418178	IPI00644712;IPI00889791;IPI00893062;IPI00893179	G22P1;XRCC6;CTA-216E10.7-002;hCG_2013151;CTA-216E10.7-005;CTA-216E10.7-004	P12956;B2RDN9;B1AHC8;B1AHC9;B4DE32;B4E356;Q6IC76;B1AHC7	0.143		-0.55546	-0.26913	-1.02396	-0.373286	0.68044	0.180817	0.82982	0.491763	0.772022	48	43	32	69.842	609	70.4	71.8	46.6	134.26	134.45	43.929	123.55	91.548	48.714	89.813	117.76	85.156	185.19	164.27	42.259	130050000	815860000	489190000	87670000	583630000	1000400000	58761000	525000000	451730000
70 kDa WD repeat tumor rejection antigen homolog;Coronin-7;cDNA FLJ37277 fis, clone BRAMY2012581, highly similar to Coronin-7;HCG1787779, isoform CRA_b;cDNA FLJ39919 fis, clone SPLEN2020154, highly similar to Coronin-7;cDNA FLJ54091, highly similar to Coronin-7;cDNA FLJ53352, highly similar to Coronin-7	IPI00027996;IPI00940326;IPI00908640	IPI00027996;IPI00940326	CORO7;hCG_1787779	P57737-1;P57737;B3KSY4;B3KUH7;B4DFD6;B4DKU9;P57737-2	0.0072767	+	0.986526	0.986593	0.839932	1.13305	1.98141	0.201713	1.9815	1.78997	2.19322	5	1	1	100.6	925	6.6	1.4	1.4	109.15	131.52	141.95	70.365	67.039	24.113							4506200	2647200	6032700	67621	365850	1689100	79448	215860	173430
72 kDa gelatinase;72 kDa type IV collagenase;Gelatinase A;Matrix metalloproteinase-2;PEX;TBE-1;cDNA FLJ59773, highly similar to 72 kDa type IV collagenase (EC 3.4.24.24);MMP2	IPI00027780;IPI00895858	IPI00027780;IPI00895858	CLG4A;MMP2	P08253;B4DWH3;Q2EF79	0.140019		1.49126		1.82465	1.15788	2.81135	0.926953		3.54221	2.2313	0	1	2	73.881	660	0	1.8	4.7	73.223	87.402	105.14										0	0	0	4012500	1291000	4496300	72362	243350	108940
72 kDa ICln-binding protein;Histone-arginine N-methyltransferase PRMT5;Jak-binding protein 1;Protein arginine N-methyltransferase 5;Shk1 kinase-binding protein 1 homolog;cDNA, FLJ96564, highly similar to Homo sapiens SKB1 homolog (S. pombe) (SKB1), mRNA;cDNA FLJ90770 fis, clone THYRO1000866, highly similar to Protein arginine N-methyltransferase 5 (EC 2.1.1.-);Protein arginine methyltransferase 5…	IPI00441473;IPI00064328;IPI00794580;IPI00793983;IPI00952972;IPI00792693	IPI00441473;IPI00064328;IPI00794580;IPI00793983	HRMT1L5;IBP72;JBP1;PRMT5;SKB1;hCG_41976	O14744;B2RDD7;B5BU10;A8MZ91;B4DV00;B4DX49;B4DY30;A8MTP3	0.0978946		0.40102	0.555914	0.130697	0.51645	1.32044	0.206171	1.4701	1.09482	1.43043	7	10	9	72.683	637	13.3	15.7	15.2	120.16	110.13	79.831	76.442	65.791	16.63	61.725	83.743	9.2603	109.97	122.03	31.096	12024000	71028000	29639000	33435000	112030000	85931000	1324200	7102300	5142200
721P;B-lymphocyte antigen;Protein XE7;Splicing factor, arginine/serine-rich 17A	IPI00024024;IPI00643565;IPI00845316	IPI00024024	CXYorf3;DXYS155E;SFRS17A;XE7	Q02040-1;Q02040	0.262254		-0.437608	-0.246396	-0.62882		0.738358	0.138801	0.843	0.646705		4	3	2	80.735	695	4.7	3	2.6	66.186	77.198	45.06	85.014	156.68	38.71	86.618	0.31998	102.49				799380	1830200	1268200	11453000	4161200	938940	0	71616	0
75 kDa DNA-pairing protein;Oncogene FUS;Oncogene TLS;POMp75;RNA-binding protein FUS;Translocated in liposarcoma protein;Fus-like protein;cDNA FLJ58049, highly similar to RNA-binding protein FUS;BBF2H7/FUS protein;Putative uncharacterized protein FUS	IPI00260715;IPI00221354;IPI00941083;IPI00645208;IPI00909890;IPI00428056;IPI00854677	IPI00260715;IPI00221354;IPI00941083;IPI00645208;IPI00909890;IPI00428056;IPI00854677	FUS;TLS	P35637-1;P35637;Q13344;P35637-2;B4DR70;Q70T18;A6NMX6	0.967411		-0.0202654	-0.0353283	-0.773828	0.74836	0.986051	0.554921	0.97581	0.584864	1.67988	8	5	7	53.376	528	23.5	14.4	17.4	136.88	121.69	53.404	108.61	98.316	26.534	75.13	53.85	43.03	196.62	96.425	83.166	19216000	269990000	64529000	25667000	85545000	78581000	5497000	49991000	18796000
75 kDa glucose-regulated protein;Heat shock 70 kDa protein 9;Mortalin;Peptide-binding protein 74;Stress-70 protein, mitochondrial;cDNA FLJ51811, highly similar to Stress-70 protein, mitochondrial;cDNA FLJ51907, highly similar to Stress-70 protein, mitochondrial;Heat shock 70 kDa protein 9B;HSPA9 protein;Catecholamine-regulated protein 40;cDNA FLJ51903, highly similar to Stress-70 protein, mitocho…	IPI00007765;IPI00922694	IPI00007765;IPI00922694	GRP75;HSPA9;HSPA9B	P38646;B7Z1V7;B7Z4V2;Q2F839;Q8N1C8;A1XP52;B7Z4T3	0.00672499	+	-1.50228	-1.41993	-1.34119	-1.74571	0.352996	0.0507611	0.37373	0.394695	0.298187	56	60	57	73.68	679	67	66.6	60.8	151.49	151.48	125.8	154.47	112.93	60.337	109.15	149.7	136.23	192.27	165.72	38.985	249850000	3694400000	668770000	267830000	1497200000	4003800000	88664000	720930000	550080000
76 kDa protein;LAMA-like protein 2;Lamina ancestor homolog 2;Phospholipase B domain-containing protein 2;Putative phospholipase B-like 2;Putative phospholipase B-like 2 32 kDa form;Putative phospholipase B-like 2 45 kDa form	IPI00169285;IPI00930153	IPI00169285;IPI00930153	PLBD2	Q8NHP8	0.00881903	+	1.04296	1.24001	0.950899	0.937961	2.06045	0.252768	2.362	1.93308	1.91582	4	6	4	65.471	589	7.6	14.8	8.3	111.64	119.51	90.374	178.85	170.85	11.4	58.29	44.652	47.052	162.56	71.898	15.992	876510	4722900	3572400	8400200	47991000	56228000	2402400	3183000	8217700
76 kDa RhoB effector protein;GTP-Rho-binding protein 2;p76RBE;Rhophilin-2;cDNA, FLJ96063, highly similar to Homo sapiens rhophilin, Rho GTPase binding protein 2 (RHPN2), mRNA;cDNA FLJ40927 fis, clone UTERU2006593, highly similar to Rhophilin-2;cDNA FLJ44542 fis, clone UTERU3005585, highly similar to Rhophilin-2;cDNA FLJ55370, highly similar to Rhophilin-2	IPI00292548;IPI00736595	IPI00292548	RHPN2	Q8IUC4;B2RCG8;B3KUY8;B3KX27;B4DUS7	0.349275		-0.144477	-0.232786	-0.0561673		0.904708	0.0783658	0.85099	0.961816		2	1	0	76.992	686	2.6	1.3	0	87.546	87	91.942	67.176	41.601	107.96							457490	966450	887640	79506	1363300	187140	0	0	0
78 kDa gastrin-binding protein;Long chain 3-hydroxyacyl-CoA dehydrogenase;Long-chain enoyl-CoA hydratase;TP-alpha;Trifunctional enzyme subunit alpha, mitochondrial;cDNA FLJ53969, highly similar to Trifunctional enzyme subunit alpha, mitochondrial;cDNA FLJ54509, highly similar to Trifunctional enzyme subunit alpha, mitochondrial;Putative uncharacterized protein HADHA;Trifunctional protein alpha-su…	IPI00031522;IPI00908351	IPI00031522	HADH;HADHA	P40939;B4DDZ5;B4DRH6;Q53T69;Q53TA2;Q9UQC5	0.103904		0.393652	0.474981	0.124802	0.581173	1.31371	0.210394	1.3899	1.09036	1.49607	40	50	23	82.999	763	50.5	68	31.7	92.118	91.924	60.101	104.71	87.273	31.165	74.175	104.96	65.873	178.64	132.47	51.084	164210000	185400000	582180000	140190000	590020000	837440000	36755000	39370000	120330000
78 kDa glucose-regulated protein;Endoplasmic reticulum lumenal Ca(2+)-binding protein grp78;Heat shock 70 kDa protein 5;Immunoglobulin heavy chain-binding protein;cDNA FLJ60062, highly similar to 78 kDa glucose-regulated protein;HSPA5 protein	IPI00003362;REV__IPI00719173;REV__IPI00844170;REV__IPI00941727;IPI00552784;IPI00419728;IPI00030122;REV__IPI00644236;REV__IPI00025804	IPI00003362	GRP78;HSPA5	P11021;B4DEF7;Q2KHP4	0.239074		0.309572	0.0582473	0.674291	0.196178	1.23934	0.294716	1.0412	1.59581	1.14566	58	62	65	72.421	655	60	62.6	58.8	129.49	141.43	71.961	114.55	82.345	57.819	99.734	147.59	94.796	170.15	144.89	34.178	432850000	3313500000	1186900000	1026700000	6918300000	6009000000	448820000	3719100000	1552600000
7-dehydrocholesterol reductase;Putative sterol reductase SR-2;Sterol Delta(7)-reductase;cDNA FLJ77740, highly similar to Homo sapiens 7-dehydrocholesterol reductase, mRNA;cDNA, FLJ93191, Homo sapiens 7-dehydrocholesterol reductase (DHCR7), mRNA;cDNA FLJ51181, highly similar to 7-dehydrocholesterol reductase (EC 1.3.1.21)	IPI00294501	IPI00294501	D7SR;DHCR7	Q9UBM7;A8K0D2;B2R6Z2;B4E1K5	0.205482		-0.596021	0.0408223	-0.998629	-0.830255	0.661576	0.288752	1.0287	0.500475	0.56243	3	6	3	54.489	475	5.9	12	5.5	78.061	62.028	45.432	91.012	96.983	36.985	51.751	71.569	33.807	69.195	138.39	16.166	1723100	2804500	3385200	5683700	18209000	7146300	3636200	6078100	1384400
80 kDa nuclear cap-binding protein;Nuclear cap-binding protein subunit 1	IPI00019380;IPI00513689	IPI00019380	CBP80;NCBP;NCBP1	Q09161	0.479007		-0.614325	-0.0392367	-1.18941		0.653235	0.378082	0.97317	0.438481		4	2	0	91.838	790	6.1	3	0	124.65	102.36	33.018	33.005	23.838	17.718	217.09	266.06	30.555				5110100	5080400	10394000	1942100	2891900	720660	0	0	0
82 kDa FMRP-interacting protein;Cell proliferation-inducing gene 1 protein;FMRP-interacting protein 2;Nuclear fragile X mental retardation-interacting protein 2;cDNA FLJ75095, highly similar to Homo sapiens 82-kD FMRP Interacting Protein (182-FIP), mRNA;Nuclear fragile X mental retardation protein interacting protein 2;Nuclear fragile X mental retardation protein interacting protein 2, isoform CR…	IPI00002349;IPI00828018	IPI00002349	KIAA1321;NUFIP2;PIG1;hCG_29087	Q7Z417;A1L3A7	0.743183		0.149818	-0.201195		0.50083	1.10943	0.385513	0.86983		1.41503	2	0	2	76.12	695	5	0	2.9	104.06	131.8	68.969										768340	1183900	1246800	0	0	0	53426	234640	86794
84 kDa myeloperoxidase;89 kDa myeloperoxidase;Myeloperoxidase;Myeloperoxidase heavy chain;Myeloperoxidase light chain	IPI00236556;IPI00007244;IPI00236554;IPI00877025	IPI00236556;IPI00007244;IPI00236554;IPI00877025	MPO	P05164-3;P05164;P05164-1;P05164-2;A8MUK8	0.878531		0.0556385	0.343692	-0.232415		1.03932	0.295423	1.269	0.851209		1	3	0	87.248	777	0.8	3.9	0	227.76	220.16	44.924				22.018	43.487	54.862				34445	712840	177750	2759300	4997100	4345300	0	0	0
85 kDa lysosomal membrane sialoglycoprotein;CD36 antigen-like 2;Lysosome membrane protein 2;Lysosome membrane protein II;Scavenger receptor class B member 2;cDNA, FLJ93482, Homo sapiens scavenger receptor class B, member 2 (SCARB2), mRNA;Scavenger receptor class B, member 2;Scavenger receptor class B, member 2, isoform CRA_a;cDNA FLJ51982, highly similar to Lysosome membrane protein 2	IPI00217766;IPI00909338	IPI00217766;IPI00909338	CD36L2;LIMPII;SCARB2;hCG_23840	Q14108;Q53Y63;B4DKD8	0.00328604	+	1.79895	1.93866	1.86108	1.5971	3.47967	0.420788	3.8335	3.6328	3.02535	4	10	8	54.29	478	8.4	16.9	12.1	124.1	107.47	126.41	72.567	63.067	16.847	91.441	93.872	26.804	127.04	110.27	62.321	11717000	40247000	34876000	10069000	53287000	31087000	1922700	9554200	4838900
85 kDa nucleoporin;FROUNT;Nuclear pore complex protein Nup85;Nucleoporin Nup75;Nucleoporin Nup85;Pericentrin-1;cDNA FLJ42510 fis, clone BRACE2044473, highly similar to Homo sapiens pericentrin 1 (PCNT1), mRNA;cDNA FLJ53138, highly similar to Homo sapiens pericentrin 1 (PCNT1), mRNA;cDNA FLJ54688, highly similar to Homo sapiens pericentrin 1 (PCNT1), mRNA;cDNA FLJ59373, highly similar to Homo sapi…	IPI00790530;IPI00171542;IPI00909193;IPI00909272;IPI00888760	IPI00790530;IPI00171542;IPI00909193;IPI00909272	NUP75;NUP85;PCNT1	Q9BW27;B3KW81;B4DMQ3;B7Z3C2;B4DPW1;B4DYG7	0.0945358		-0.877166	-0.56354	-1.45801	-0.609944	0.544436	0.174652	0.67664	0.363994	0.655222	9	8	1	75.019	656	17.1	14.2	1.7	98.789	93.298	78.044	107.81	55.247	57.358	57.564	63.591	15.767	16.497	3.9316	20.429	14662000	15579000	11001000	10433000	19234000	9242700	27028000	33584000	27283000
86 kDa subunit of Ku antigen;ATP-dependent DNA helicase 2 subunit 2;ATP-dependent DNA helicase II 80 kDa subunit;CTC box-binding factor 85 kDa subunit;DNA repair protein XRCC5;Ku80;Ku86;Lupus Ku autoantigen protein p86;Nuclear factor IV;Thyroid-lupus autoantigen;X-ray repair complementing defective repair in Chinese hamster cells 5 (double-strand-break rejoining);X-ray repair cross-complementing …	IPI00220834;IPI00871391;IPI00925823;IPI00926445;IPI00746753	IPI00220834	G22P2;XRCC5	P13010;Q53T09;Q53TC2	0.34484		-0.378428	-0.191047	-0.981341	0.0371031	0.769275	0.267379	0.87597	0.506509	1.02605	37	34	27	82.704	732	55.7	49.5	37.8	130.18	130.84	44.203	99.776	95.007	38.929	88.477	117.73	77.356	178.05	173.54	30.706	186980000	757410000	429250000	95853000	686440000	665310000	74202000	530220000	645970000
88 kDa nucleoporin;Nuclear pore complex protein Nup88;Nucleoporin Nup88;cDNA FLJ58372, highly similar to Nuclear pore complex protein Nup88;cDNA FLJ56516, highly similar to Nuclear pore complex protein Nup88	IPI00001738	IPI00001738	NUP88	Q99567;B4DP20;B7Z5I6	0.115491		-0.737851	-0.628854	-1.25954	-0.325156	0.599632	0.191578	0.64669	0.417676	0.798212	5	6	2	83.541	741	9.7	13.2	1.9	122.91	109.72	80.266	53.702	108.49	111.26	52.892	70.16	11.554	239.6	196.09	34.531	3457200	5029200	7653400	13036000	32161000	33170000	517560	925750	2917400
90 kDa ribosomal protein S6 kinase 3;Insulin-stimulated protein kinase 1;MAP kinase-activated protein kinase 1b;pp90RSK2;Ribosomal protein S6 kinase alpha-3;Ribosomal S6 kinase 2;cDNA FLJ56618, highly similar to Ribosomal protein S6 kinase alpha-3 (EC 2.7.11.1);cDNA FLJ56653, highly similar to Ribosomal protein S6 kinase alpha-3 (EC 2.7.11.1);cDNA, FLJ79381, highly similar to Ribosomal protein S6…	IPI00020898;IPI00873914;IPI00552941;IPI00641592;IPI00007123;IPI00930650	IPI00020898	ISPK1;MAPKAPK1B;RPS6KA3;RSK2	P51812;B4DG22;B4DKZ2;B7ZB17;Q7Z2J3;Q7Z2J4	0.0774931		1.88721	0.795102	2.23148	2.63505	3.69919	2.27692	1.7352	4.69616	6.21195	1	2	1	83.735	740	1.4	3.1	1.5	106.13	128.97	167.66										45018	195810	142670	136900	1241400	1180800	32399	102290	81233
93 kDa nucleoporin;Nuclear pore complex protein Nup93;Nucleoporin Nup93;cDNA FLJ78686, highly similar to Homo sapiens nucleoporin 93kDa (NUP93), mRNA;cDNA FLJ32075 fis, clone OCBBF1000146, highly similar to Nuclear pore complex protein Nup93;cDNA FLJ58756, highly similar to Nuclear pore complex protein Nup93	IPI00397904;IPI00644506	IPI00397904;IPI00644506	KIAA0095;NUP93	Q8N1F7;A8K897;B3KPQ8	0.0622181		-0.806051	-0.510765	-1.21487	-0.692516	0.571945	0.13886	0.70185	0.430812	0.618774	22	27	13	93.487	819	31.7	38.6	20.9	114.35	117.03	66.877	125.65	94.588	72.692	101.91	102.88	33.977	66.766	115.06	18.613	30822000	56172000	64753000	65425000	88323000	94544000	6449700	28025000	15839000
94 kDa glucose-regulated protein;Endoplasmin;gp96 homolog;Heat shock protein 90 kDa beta member 1;Tumor rejection antigen 1;Tumor rejection antigen (Gp96) 1 variant;Tumor rejection antigen (Gp96) 1;HSP90B1 protein;cDNA FLJ58812, highly similar to Endoplasmin (Heat shock protein 90kDa beta member 1);cDNA FLJ58626, highly similar to Endoplasmin (Heat shock protein 90 kDa beta member 1)	IPI00027230;IPI00939289;IPI00556538;IPI00910360	IPI00027230;IPI00939289	GRP94;HSP90B1;TRA1	P14625;Q59FC6;Q5CAQ5;Q96GW1;B4DHT9;B4DU71	0.562279		0.0899486	-0.138441	0.314069	0.0942178	1.06433	0.167424	0.9085	1.24321	1.06749	74	64	60	92.468	803	66.5	56.8	55.7	133.09	133.53	52.006	137.63	97.301	49.487	106.23	140.43	80.895	155.53	139.96	27.501	405570000	2271300000	845360000	479850000	2150100000	2610700000	327080000	1685900000	2218400000
96 kDa nucleoporin;98 kDa nucleoporin;Nuclear pore complex protein Nup96;Nuclear pore complex protein Nup98;Nuclear pore complex protein Nup98-Nup96;Nucleoporin Nup96;Nucleoporin Nup98;cDNA FLJ77211, highly similar to Homo sapiens nucleoporin 98kDa (NUP98), transcript variant 3, mRNA	IPI00337397;IPI00953181;IPI00216688;IPI00006038;IPI00797307;IPI00337395;IPI00936708;IPI00337396	IPI00337397;IPI00953181;IPI00216688;IPI00006038;IPI00797307	ADAR2;NUP98	P52948-5;P52948;P52948-6;P52948-2;P52948-1;A8KA17;C9K077	0.679928		-0.414475	-0.00434893	-2.0795	0.840422	0.750293	0.777048	0.99699	0.236597	1.79057	18	7	3	195.82	1800	12.1	5.6	2.6	116.12	105.03	111.09	92.077	95.128	64.59	85.065	34.92	76.728	192.76	170.12	12.279	17910000	18083000	29157000	10485000	27009000	26993000	1091400	1383700	2584700
A15 homolog;Putative NF-kappa-B-activating protein 321;T245 protein;Tetraspanin TM4-D;Tetraspanin-6;Transmembrane 4 superfamily member 6;cDNA FLJ90591 fis, clone PLACE1001081, highly similar to Tetraspanin-6;cDNA FLJ52167, highly similar to Tetraspanin-6;Transmembrane 4 superfamily member 6 variant;cDNA FLJ50175, highly similar to Tetraspanin-6	IPI00013449;IPI00909503	IPI00013449;IPI00909503	TM4SF6;TSPAN6;UNQ767/PRO1560	O43657;B3KQJ7;B4DUZ1;Q59ED5;B4DRB0	0.0772816		3.50958	3.93772	3.08143		11.3891	4.85038	15.324	8.46453		1	3	1	27.563	245	4.9	8.6	4.9	193.43	171.31	208.32				152.79	161.07	33.261				18171	482170	424560	671600	14117000	4501600	0	1350000	0
A190;DNA-directed RNA polymerase I largest subunit;DNA-directed RNA polymerase I subunit A;DNA-directed RNA polymerase I subunit RPA1;RNA polymerase I 194 kDa subunit;DNA-directed RNA polymerase;POLR1A protein;cDNA: FLJ21915 fis, clone HEP03920	IPI00031960;IPI00916060	IPI00031960;IPI00916060	POLR1A	O95602;B7Z284;B7Z8X7;B7ZKR9;Q53T12;Q96AG9;Q9H6T2;B9ZVN9	0.0956454		-1.37566	-1.16741	-1.5839		0.385377	0.0789428	0.44522	0.333578		11	7	0	194.81	1720	9.5	6	0	101.61	102.36	102.69	76.508	56.086	68.616	93.287	74.83	24.869				2994800	5962400	2167700	8787000	12755000	3451600	0	0	0
A34.5;Antisense to ERCC-1 protein;CD3-epsilon-associated protein;DNA-directed RNA polymerase I subunit RPA34;RNA polymerase I-associated factor PAF49;cDNA FLJ75784, highly similar to Homo sapiens CD3E antigen, epsilon polypeptide associated protein (CD3EAP), mRNA;CD3EAP protein	IPI00012788;IPI00645816;IPI00219938;IPI00006982;IPI00219939	IPI00012788;IPI00645816	ASE1;CAST;CD3EAP;PAF49	O15446-2;O15446;A8K818;O15446-1;A0JLT1;Q05BI1	0.299663		-0.980576	0.127105	-0.774081	-2.29475	0.506777	0.445644	1.0921	0.584761	0.203803	2	2	2	55.171	512	7	5.9	5.9	284.64	296.94	153.55	51.167	82.646	32.102	293.26	414	123.76	425.64	327.99	25.391	6702400	8071500	19779000	4658100	6467700	4359100	3190200	400430	809480
A-69G12.1;G-protein coupled receptor family C group 5 member B;Retinoic acid-induced gene 2 protein;cDNA FLJ55176, highly similar to G-protein coupled receptor family C group 5 member B;cDNA FLJ54266, highly similar to G-protein coupled receptor family C group 5 member B;cDNA, FLJ78888, highly similar to G-protein coupled receptor family C group 5 member B;cDNA FLJ53055, highly similar to G-prote…	IPI00008239;IPI00922136;IPI00922816;IPI00922190	IPI00008239;IPI00922136;IPI00922816;IPI00922190	GPRC5B;RAIG2	Q9NZH0;B7Z831;B7Z2G0;B7Z9M4;B7Z440;B7Z2X6	0.316826		-1.0552	-0.152116	-0.368042	-2.64545	0.48123	0.396157	0.89993	0.774833	0.159824	3	1	1	47.695	429	6.1	3.3	3.3	104.41	109.01	92.254	42.403	81.668	27.99				76.056	107.43	7.7877	843720	2157000	2158500	395600	5084100	361330	254280	846460	918900
A6-related protein;Protein tyrosine kinase 9-like;Twinfilin-1-like protein;Twinfilin-2	IPI00550917;IPI00946591	IPI00550917	MSTP011;PTK9L;TWF2	Q6IBS0	0.974359		-0.013305	-0.132262	-0.580724	0.673072	0.99082	0.479897	0.9124	0.668628	1.59446	3	4	1	39.548	349	14.3	18.1	5.2	75.75	76.796	45.256	41.882	34.115	14.873	23.258	20.438	35.553	19.287	5.4992	24.786	6324900	4848600	8348200	1627400	13165000	7325900	451550	4750100	2669800
aarF domain-containing protein kinase 3;Chaperone activity of bc1 complex-like, mitochondrial;CABC1 protein;cDNA FLJ55470, highly similar to Chaperone-activity of bc1 complex-like, mitochondrial;Chaperone, ABC1 activity of bc1 complex homolog (S. pombe);cDNA FLJ59354, highly similar to Chaperone-activity of bc1 complex-like, mitochondrial;cDNA FLJ33175 fis, clone ADRGL2002392, highly similar to C…	IPI00176469;IPI00641178;IPI00644715;IPI00645029;IPI00909384;IPI00909535	IPI00176469;IPI00641178;IPI00644715;IPI00645029;IPI00909384	ADCK3;CABC1;PP265;RP5-1087E8.1-002;RP5-1087E8.1-003	Q8NI60-1;Q8NI60;A1L377;Q8NI60-3;B4DVB7;Q5T7A4;Q8NI60-4;B4DN23;Q5T7A2;Q8NI60-2;B4DED1	0.233985		-0.451446	-0.277622	-0.62527		0.731309	0.124912	0.82495	0.648298		2	1	0	71.949	647	2.8	2.5	0	118.31	80.965	108.83										274930	963530	1267800	3167800	9649500	2147800	0	0	0
Abeta-degrading protease;Insulin protease;Insulin-degrading enzyme;Insulysin;cDNA, FLJ93240, highly similar to Homo sapiens insulin-degrading enzyme (IDE), mRNA;cDNA FLJ35968 fis, clone TESTI2013053, highly similar to INSULIN-DEGRADING ENZYME (EC 3.4.24.56);cDNA FLJ53247, highly similar to Insulin-degrading enzyme (EC 3.4.24.56);Insulysin variant;cDNA, FLJ79306, highly similar to Insulin-degradin…	IPI00220373;IPI00946216;IPI00514444	IPI00220373;IPI00946216	IDE	P14735;B2R721;B3KSB8;B7Z7W6;Q59GA5;B7ZAU2	0.343034		0.250478	0.264476	-0.108357	0.595315	1.1896	0.291765	1.2012	0.927644	1.5108	5	5	1	117.97	1019	5.4	4.9	1.1	109.83	95.276	80.059	155.36	155.31	64.472	22.462	11.791	24.3				8897800	3212600	8397900	802780	7205600	6546100	99460	219170	294240
ABP125;ABP130;Protein transport protein Sec31A;SEC31-like protein 1;SEC31-related protein A;Web1-like protein;cDNA FLJ58531, highly similar to Homo sapiens SEC31-like 1 (SEC31L1), transcript variant 1, mRNA;SEC31A protein;Putative uncharacterized protein SEC31A	IPI00852741;IPI00746182;IPI00795507;IPI00515103;IPI00305152;IPI00853220;IPI00953506;IPI00445429;IPI00853290;IPI00853086;IPI00923389	IPI00852741;IPI00746182;IPI00795507;IPI00515103;IPI00305152;IPI00853220;IPI00953506;IPI00445429;IPI00853290	HSPC275;HSPC334;KIAA0905;SEC31A;SEC31L1	O94979-8;O94979;O94979-1;O94979-2;B4DIW6;B7ZKZ7;B7ZL00;O94979-4;O94979-3;O94979-6;C9JEA2;O94979-7;O94979-5	0.29226		0.625289	0.437228	-0.0275787	1.46622	1.54252	0.939808	1.354	0.981065	2.76297	8	6	7	134.5	1233	7.7	5.9	7	116.59	112.34	99.83	62.637	70.288	27.675	95.882	94.529	21.6	114.13	115.8	46.596	2774000	4539800	6688400	5129800	11695000	5114200	27287000	33458000	55486000
ABP-278;ABP-280 homolog;Actin-binding-like protein;Beta-filamin;Filamin homolog 1;Filamin-3;Filamin-B;Thyroid autoantigen;Truncated actin-binding protein;Filamin B;Putative uncharacterized protein FLNB;Putative uncharacterized protein DKFZp686A1668	IPI00289334;IPI00477536;IPI00943563;IPI00382697;IPI00953109;IPI00940093;IPI00953286;IPI00945610;IPI00382698;IPI00382699;IPI00798140;IPI00382700;IPI00945771;IPI00937774;IPI00798186;IPI00012438	IPI00289334;IPI00477536;IPI00943563;IPI00382697;IPI00953109;IPI00940093;IPI00953286;IPI00945610;IPI00382698;IPI00382699	FLN1L;FLN3;FLNB;TABP;TAP;DKFZp686A1668	O75369-1;O75369;B2ZZ85;O75369-2;Q60FE7;O75369-3;O75369-6;C9JMC4;O75369-7;C9JKE6;Q68CT4;O75369-4;O75369-5	0.0253228	+	-2.03074	-1.42919	-2.56433	-2.09869	0.24473	0.103336	0.37134	0.169067	0.23347	146	121	59	278.19	2602	58.5	54.9	25.2	132.33	130.39	118.62	109.98	111.91	82.847	112.78	113.06	51.688	153.87	150.29	44.318	279900000	625690000	297750000	285550000	343410000	689920000	847880000	1980600000	1880000000
ABP-280-like protein;ABP-L;Actin-binding-like protein;Filamin-2;Filamin-C;Gamma-filamin;Gamma filamin variant;cDNA FLJ10186 fis, clone HEMBA1004534, highly similar to Filamin-C;Filamin C	IPI00178352;IPI00413958;IPI00455021	IPI00178352;IPI00413958	ABPL;FLN2;FLNC	Q14315-1;Q14315;Q59H94;Q14315-2;B3KM41;B5AGT3	0.0485406	+	1.92037	1.3856	1.58415	2.79136	3.7852	2.3849	2.6128	2.99832	6.92281	92	109	127	291.02	2725	33.1	41.3	44.3	126.45	117.98	145.58	87.228	82.785	47.505	75.801	93.193	52.9	147.25	114.59	71.339	120020000	190830000	129690000	214810000	453720000	375590000	1434100000	4112700000	2721800000
ABPP;Alzheimer disease amyloid protein;Amyloid beta A4 protein;Amyloid intracellular domain 50;Amyloid intracellular domain 57;Amyloid intracellular domain 59;APPI;Beta-amyloid protein 40;Beta-amyloid protein 42;Beta-APP40;Beta-APP42;C31;C80;C83;C99;Cerebral vascular amyloid peptide;Gamma-CTF(50);Gamma-CTF(57);Gamma-CTF(59);Gamma-secretase C-terminal fragment 50;Gamma-secretase C-terminal fragmen…	IPI00006608;IPI00412681;IPI00412924;IPI00952639;IPI00219187;IPI00914602;IPI00219186;IPI00219185;IPI00412568;IPI00219183;IPI00394658;IPI00909502;IPI00219182	IPI00006608;IPI00412681;IPI00412924;IPI00952639;IPI00219187;IPI00914602;IPI00219186;IPI00219185;IPI00412568;IPI00219183;IPI00394658;IPI00909502	A4;AD1;APP	P05067-1;P05067;P05067-9;B4DM00;C9J740;P05067-8;B4DII8;C9JHU0;P05067-7;B4DGD0;P05067-6;C9J0K4;P05067-5;P05067-4;B4DJT9;B4DQM1;P05067-3;P05067-10;B4DMD5;B7Z313;Q9BYY9	0.421165		-0.0724216	-0.0443745	0.0361264	-0.209017	0.95104	0.0813511	0.96971	1.02536	0.865127	9	8	1	86.942	770	15.1	13.9	1	128.16	125.34	62.592	133.8	146.59	28.841	116.18	115.59	33.634				32000000	21096000	30892000	11619000	38772000	67399000	90820	122130	524710
Absent in melanoma 1 protein;Beta/gamma crystallin domain-containing protein 1;cDNA FLJ32143 fis, clone PLACE5000080, highly similar to Absent in melanoma 1 protein;cDNA FLJ43147 fis, clone CTONG3008639, highly similar to Absent in melanoma 1 protein;cDNA, FLJ79186, highly similar to Absent in melanoma 1 protein	IPI00294840;IPI00045122	IPI00294840	AIM1;CRYBG1	Q9Y4K1;B3KPT0;B3KWJ0;B7ZAH2	0.489309		-0.477785	-0.939786	-0.015783		0.718079	0.330791	0.52131	0.98912		3	1	0	188.67	1723	1.7	0.9	0	221.78	174.56	156.4	55.822	64.012	45.643							412860	987640	457220	1116700	10115000	716960	0	0	0
AC40;DNA-directed RNA polymerases I and III 40 kDa polypeptide;DNA-directed RNA polymerases I and III subunit RPAC1;RPA39;RPC40;POLR1C protein;Polymerase (RNA) I polypeptide C, 30kDa	IPI00005179;IPI00217386;IPI00645499;IPI00552946;IPI00911024;IPI00552334;IPI00552677;REV__IPI00744606;IPI00640578	IPI00005179;IPI00217386;IPI00645499;IPI00552946	POLR1C;POLR1E;RP3-337H4.4-009;RP3-337H4.4-004;RP3-337H4.4-005	O15160-1;O15160;Q96HT3;O15160-2;Q5JTE4;Q5JTE0;Q5JTD9	0.0484652	+	-0.444834	-0.648145	-0.341075	-0.345283	0.734669	0.0867274	0.6381	0.789453	0.787154	9	9	4	39.249	346	33.2	32.7	17.9	85.611	87.395	43.719	57.382	80.808	63.731	107.77	103.01	23.469	101.83	83.287	17.12	8693200	18399000	17470000	24600000	37685000	16397000	29544000	10820000	11604000
ACC-alpha;Acetyl-CoA carboxylase 1;Biotin carboxylase;Acetyl-Coenzyme A carboxylase alpha;HCG30204, isoform CRA_b;cDNA FLJ52591, highly similar to Acetyl-CoA carboxylase 1 (EC 6.4.1.2);cDNA FLJ52592, highly similar to Acetyl-CoA carboxylase 1 (EC 6.4.1.2);cDNA FLJ50410, highly similar to Acetyl-CoA carboxylase 1 (EC 6.4.1.2);cDNA FLJ54634, highly similar to Acetyl-CoA carboxylase 1 (EC 6.4.1.2);c…	IPI00396015;IPI00942045;IPI00011569;IPI00793409;IPI00847501;IPI00396018;IPI00472339;IPI00848209;IPI00796157;IPI00796495;IPI00793750;IPI00887706	IPI00396015;IPI00942045;IPI00011569;IPI00793409;IPI00847501;IPI00396018	ACAC;ACACA;ACC1;ACCA;hCG_30204	Q13085-4;Q13085;Q13085-1;B2ZZ90;Q13085-2;Q13085-3;B4DIG6;B4DIR2;B4DIW1;B4DK31;B4DWK9;Q59FY4;Q7Z5W8	0.090215		-0.682371	-0.58502	-0.779722		0.62314	0.0595108	0.66664	0.582479		13	5	0	270	2383	6.9	2.8	0	92.702	95.507	53.922	75.85	86.856	42.826	58.277	50.584	22.854				3863800	6143700	10952000	1013100	6597000	1643300	0	0	0
Acetoacetyl-CoA synthetase;Acyl-CoA synthetase family member 1;Protein sur-5 homolog	IPI00217272;IPI00646775;IPI00789348;IPI00908814;IPI00334184;IPI00790421;IPI00168910;REV__IPI00797537;IPI00655783;REV__IPI00306398;IPI00939481;IPI00477825;IPI00942780;IPI00655630;IPI00478280;IPI00479032;REV__IPI00789225;IPI00640919;IPI00656089;IPI00925194;IPI00655845;IPI00332250;IPI00646985;IPI00884921;IPI00927624	IPI00217272;IPI00646775	AACS;ACSF1	Q86V21-1;Q86V21;Q86V21-2	0.0560787		-0.654108	-0.835446	-0.795518	-0.331361	0.635468	0.131014	0.56041	0.576136	0.794786	3	2	1	75.143	672	3.4	3.1	1.3	69.577	59.665	59.169	79.51	86.412	37.928							823910	1074800	531290	346550	2382400	449290	344890	67606	363510
Acetoacetyl-CoA thiolase;Acetyl-CoA acetyltransferase, mitochondrial;T2	IPI00030363;IPI00062003	IPI00030363	ACAT;ACAT1;MAT	P24752	0.515388		0.0951864	-0.00296026	-0.0482362	0.336756	1.0682	0.162609	0.99795	0.967118	1.26291	15	16	8	45.199	427	40.7	38.9	24.6	108.59	93.611	62.696	135.35	119.21	39.697	66.045	76.056	21.828	220.67	114.3	20.793	11817000	42506000	36334000	12691000	87765000	92513000	6025500	55843000	55626000
Acetolactate synthase-like protein;IlvB-like protein	IPI00554541;IPI00556135;IPI00556506	IPI00554541	AHAS;ILVBL	A1L0T0-1;A1L0T0	0.705774		-0.229973	0.231678	-0.691623		0.852651	0.392475	1.1742	0.619157		6	6	0	67.867	632	15	17.7	0	107.55	103.41	25.295	169.63	172.78	31.683	50.632	48.642	16.251				103950000	11193000	17389000	18815000	82350000	26179000	0	0	0
Acetyl-CoA acetyltransferase, cytosolic;Acetyl-CoA transferase-like protein;Cytosolic acetoacetyl-CoA thiolase;cDNA FLJ76813, highly similar to Homo sapiens acetyl-Coenzyme A acetyltransferase 2 (acetoacetyl Coenzyme A thiolase), mRNA;cDNA FLJ53975, highly similar to Acetyl-CoA acetyltransferase, cytosolic (EC 2.3.1.9);Acetyl-CoA acetyltransferase, cytosolic variant	IPI00291419;REV__IPI00014374;REV__IPI00654901;REV__IPI00844057;REV__IPI00643862;REV__IPI00478703;REV__IPI00654566	IPI00291419	ACAT2;ACTL	Q9BWD1;A8K4W5;B7Z233;Q59GW6	0.063216		1.08894	1.49385	0.532658	1.24032	2.12718	0.697769	2.8164	1.44659	2.3625	10	9	10	44.642	426	37.3	37.1	34.5	123.5	123.98	151.88	45.982	45.032	24.838	33.522	48.79	46.777	196.99	117.81	22.101	14972000	72621000	57990000	18602000	96732000	52864000	6000700	59681000	21732000
Acetylglucosamine phosphomutase;N-acetylglucosamine-phosphate mutase;Phosphoacetylglucosamine mutase;Phosphoglucomutase-3;cDNA FLJ13370 fis, clone PLACE1000653, highly similar to Phosphoacetylglucosamine mutase (EC 5.4.2.3);cDNA FLJ55543, highly similar to Phosphoacetylglucosamine mutase (EC 5.4.2.3)	IPI00941001;IPI00030116;IPI00643166	IPI00941001;IPI00030116;IPI00643166	AGM1;PGM3	O95394;B3KN28;B4DX94	0.344078		0.590777	0.0729976	0.148065	1.55127	1.50606	1.0689	1.0519	1.10808	2.93075	6	4	2	59.851	542	10.3	6.8	3.7	126.42	112.56	70.565	116.27	85.987	19.321	32.846	61.499	19.419	103.05	18.971	6.6051	4457200	9196200	4356700	3577900	24130000	14268000	12359000	8813400	23408000
Acetylneuraminyl hydrolase;G9 sialidase;Lysosomal sialidase;N-acetyl-alpha-neuraminidase 1;Sialidase-1;cDNA FLJ78216, highly similar to Homo sapiens lysosomal neuraminidase, mRNA;Neuraminidase variant;cDNA, FLJ93471, Homo sapiens sialidase 1 (lysosomal sialidase) (NEU1), mRNA;NEU1 protein;Sialidase 1 (Lysosomal sialidase);Sialidase 1 (Lysosomal sialidase), isoform CRA_a;Neurominidase;Neuraminidase	IPI00029817	IPI00029817	NANH;NEU1;DAAP-222I20.1-001;DADB-333F21.3-001;DAMA-196C9.1-001;DAMC-303C24.1-001;DAQB-331I12.2-001;DASS-36P22.1-001;hCG_43692;XXbac-BCX40G17.11-001;XXbac-BPG254B15.3-001	Q99519;A8K4K1;Q59GU8;Q5JQI0;Q6IBT5;Q6Q4G7;Q6Q4G8;Q6Q4G9	0.0910624		0.9411	0.341986	1.34227	1.13905	1.91999	0.657362	1.2675	2.5355	2.20235	1	4	1	45.467	415	2.4	13.3	2.4	107.88	98.668	93.935				76.362	65.596	24.25				2797800	733180	1250900	6385800	11748000	17551000	343940	821150	2047400
Acid beta-glucosidase;Alglucerase;Beta-glucocerebrosidase;D-glucosyl-N-acylsphingosine glucohydrolase;Glucosylceramidase;Imiglucerase;cDNA, FLJ92865, Homo sapiens glucosidase, beta;acid (includes glucosylceramidase)(GBA), mRNA;cDNA FLJ50618, highly similar to Glucosylceramidase (EC 3.2.1.45);cDNA FLJ51780, highly similar to Glucosylceramidase (EC 3.2.1.45);cDNA FLJ50695, highly similar to Glucosy…	IPI00021807;IPI00759616;IPI00845473;IPI00940598;IPI00930466;IPI00903033	IPI00021807;IPI00759616;IPI00845473;IPI00940598	GBA;GC;GLUC	P04062-1;P04062;B2R6A7;B7Z5G2;B7Z6E6;B7Z6S1;B7Z6S9;B7Z7D8;B7Z7G9;Q9UQU9;P04062-2;B7Z731;P04062-3	0.00129731	+	1.56926	1.57245	1.56606		2.96752	0.00930235	2.9741	2.96095		1	4	0	68.76	621	2.3	6.4	0	146.47	147.99	111.73				117.86	114.41	17.68				7859700	471400	2307700	14521000	2786000	10452000	0	0	0
Acid DNase;Deoxyribonuclease II alpha;Deoxyribonuclease-2-alpha;Lysosomal DNase II;R31240_2;cDNA PSEC0141 fis, clone PLACE1005913, highly similar to Deoxyribonuclease-2-alpha (EC 3.1.22.1);Deoxyribonuclease II;cDNA FLJ51996, highly similar to Deoxyribonuclease-2-alpha (EC 3.1.22.1)	IPI00010348;IPI00922554	IPI00010348;IPI00922554	DNASE2;DNASE2A;DNL2	O00115;B3KQS9;C0LQF2;B7Z4K6	0.222115		-0.344188	-0.101799	-0.197236	-0.733528	0.787751	0.176103	0.93187	0.87222	0.601431	2	2	1	39.58	360	5.3	5.3	1.9	113.05	115.75	76.408	137.13	119.84	14.128	48.564	88.021	60.559				5906300	1793500	2798000	2629500	6882300	3195700	8038400	11174000	890910
Acid sphingomyelinase-like phosphodiesterase 3b;cDNA FLJ61214, highly similar to Acid sphingomyelinase-like phosphodiesterase 3b (EC 3.1.4.-);cDNA FLJ56798, highly similar to Acid sphingomyelinase-like phosphodiesterase 3b (EC 3.1.4.-);cDNA FLJ57705, highly similar to Acid sphingomyelinase-like phosphodiesterase 3b (EC 3.1.4.-)	IPI00550115;IPI00386427;IPI00908315;IPI00514631	IPI00550115;IPI00386427;IPI00908315	ASML3B;SMPDL3B	Q92485-1;Q92485;B4DEC6;B4DW34;Q92485-2;B4DE65	0.192675		-1.11997	-0.770264	-1.46968		0.460103	0.159274	0.58631	0.361063		4	4	0	50.813	455	11.4	13.2	0	124.01	106.53	131.71	56.66	122.4	56.565	60.912	53.748	48.907				3344100	3562900	3003000	4984800	18232000	5497300	0	0	0
Acidic leucine-rich nuclear phosphoprotein 32 family member A;Acidic nuclear phosphoprotein pp32;Leucine-rich acidic nuclear protein;Mapmodulin;Potent heat-stable protein phosphatase 2A inhibitor I1PP2A;Putative HLA-DR-associated protein I;ANP32A protein	IPI00025849;IPI00940656;IPI00449263;IPI00760940;IPI00916115;IPI00172487;IPI00018262;REV__IPI00005600;REV__IPI00737119;REV__IPI00855747;REV__IPI00006379;REV__IPI00911075;REV__IPI00065432;REV__IPI00917530	IPI00025849;IPI00940656;IPI00449263	ANP32A;C15orf1;LANP;MAPM;PHAP1	P39687;Q08AJ6;Q3KPI8;Q6PKH8	0.114108		1.27704	1.62943	0.340824	1.86087	2.42341	1.24004	3.0939	1.26648	3.63227	9	11	14	28.585	249	20.9	32.1	50.6	168.03	143.22	135.98	141.76	75.102	61.698	122.27	129.98	34.619	218.96	159	52.379	2049200	46503000	20298000	391820000	367940000	301430000	67839000	476920000	242630000
Acidic leucine-rich nuclear phosphoprotein 32 family member B;Acidic protein rich in leucines;Putative HLA-DR-associated protein I-2;Silver-stainable protein SSP29;Acidic (Leucine-rich) nuclear phosphoprotein 32 family, member B variant	IPI00007423;IPI00759824;IPI00647001;IPI00930163;IPI00887411;IPI00295519;IPI00470909;IPI00940289;IPI00607570;IPI00744149;IPI00876914;IPI00307214;IPI00908539;IPI00790034;IPI00645753	IPI00007423;IPI00759824	ANP32B;APRIL;PHAPI2	Q92688-1;Q92688;Q53F35;Q92688-2	0.135903		1.0746	1.63812	0.201626	1.38406	2.10614	1.01948	3.1126	1.14999	2.61001	5	7	8	28.787	251	12.7	22.3	19.1	129.54	111.29	113.41	202.62	35.891	36.701	86.529	133.72	17.038	346.94	40.936	94.093	41793	480630	143250	32829000	9014800	42405000	274500	2503200	3155500
Acidic leucine-rich nuclear phosphoprotein 32 family member E;LANP-like protein;Acidic (Leucine-rich) nuclear phosphoprotein 32 family, member E variant;Acidic (Leucine-rich) nuclear phosphoprotein 32 family, member E;Acidic (Leucine-rich) nuclear phosphoprotein 32 family, member E, isoform CRA_a;cDNA FLJ54218, highly similar to Acidic leucine-rich nuclear phosphoprotein 32 family member E;cDNA F…	IPI00165393;IPI00640833;IPI00514333;IPI00910423;IPI00910661;IPI00514758	IPI00165393;IPI00640833;IPI00514333;IPI00910423;IPI00910661	ANP32E;hCG_1998392;RP4-790G17.1-002;RP4-790G17.1-004	Q9BTT0;Q53F20;Q5TB20;Q5TB19;B4E0D5;B4E0I6	0.389263		0.373979	0.966356	-0.22132	0.376901	1.29592	0.551549	1.9539	0.85778	1.29855	2	6	4	30.692	268	5.2	19	11.6	126.33	104.35	127.29	65.821	91.985	19.371	92.191	110.11	20.801	199.86	98.225	13.105	686290	4675800	2565100	5724600	65585000	20948000	5314300	13846000	45269000
Acidic nucleoplasmic DNA-binding protein 1;WD repeat and HMG-box DNA-binding protein 1;cDNA FLJ78476, highly similar to Homo sapiens WD repeat and HMG-box DNA binding protein 1 (WDHD1), transcript variant 1, mRNA;WDHD1 protein;Putative uncharacterized protein WDHD1;cDNA FLJ10676 fis, clone NT2RP2006464, highly similar to WD repeat and HMG-box DNA-binding protein 1;cDNA FLJ10723 fis, clone NT2RP30…	IPI00411614;IPI00513835;IPI00879598	IPI00411614;IPI00513835	AND1;WDHD1	O75717;A8KAE0;Q05DR3;A8MRA5;B3KMC2;B3KMD2;C9JW18	0.112867		-1.59857	-1.31215	-1.88499		0.330204	0.0933198	0.40272	0.270746		22	7	1	125.97	1129	26.9	7.8	1.4	133.73	114.14	172	100.5	127.44	131.04	90.459	75.737	66.024				38692000	38949000	37068000	4016000	6592900	3795300	0	0	173320
Acidic-type mitochondrial creatine kinase;Creatine kinase U-type, mitochondrial;Ubiquitous mitochondrial creatine kinase;Putative uncharacterized protein CKMT1A;Putative uncharacterized protein CKMT1B	IPI00658109;IPI00877726;IPI00852728;IPI00921866;IPI00878893;IPI00935707;IPI00922077;IPI00797318;IPI00024638;IPI00853566;IPI00908823	IPI00658109;IPI00877726;IPI00852728	CKMT;CKMT1A;CKMT1B	P12532-1;P12532;P12532-2;C9JT96;C9JSQ1	0.083925		-1.85101	-1.04124	-1.55375	-2.95804	0.277198	0.179644	0.48591	0.340623	0.128689	25	21	8	47.036	417	56.6	52.3	29.7	167.23	142.27	142.53	113.42	96.04	56.095	119.45	128.24	37.192	179.55	128.67	61.627	17985000	174850000	80097000	27587000	157840000	427540000	2836800	7767600	14330000
Aconitase 2, mitochondrial;Aconitate hydratase, mitochondrial;Citrate hydro-lyase;cDNA, FLJ95737, highly similar to Homo sapiens aconitase 2, mitochondrial (ACO2), nuclear geneencoding mitochondrial protein, mRNA;cDNA FLJ60429, highly similar to Aconitate hydratase, mitochondrial (EC 4.2.1.3);cDNA FLJ54329, highly similar to Aconitate hydratase, mitochondrial(EC 4.2.1.3);cDNA FLJ52327, highly sim…	IPI00790739;IPI00017855;IPI00909879;IPI00382844	IPI00790739;IPI00017855;IPI00909879	ACO2;RP3-347H13.8-002	A2A274;Q99798;B2RBW5;B4DEC3;B4DJW1;B4DLY4;B4DZ08;Q71UF1;B4DW08	0.0142145	+	1.31115	1.1358	1.17114	1.62651	2.48139	0.499004	2.1974	2.2519	3.08766	29	31	30	87.819	805	39.4	43	39.5	131.7	121.31	57.834	146.68	118.9	27.188	101.32	117.53	41.167	193.69	152.71	37.05	82870000	394770000	192730000	188100000	494050000	534910000	84574000	385670000	215540000
Acrogranin;Granulin A;Granulin B;Granulin C;Granulin D;Granulin E;Granulin F;Granulin G;Granulin-1;Granulin-2;Granulin-3;Granulin-4;Granulin-5;Granulin-6;Granulin-7;Granulins;Paragranulin;Proepithelin;cDNA FLJ53342, highly similar to Granulins;Granulin variant;cDNA FLJ53692, moderately similar to Granulins;cDNA FLJ13286 fis, clone OVARC1001154, highly similar to Homo sapiens clone 24720 epithelin…	IPI00296713;IPI00909124;IPI00181753;IPI00182138	IPI00296713;IPI00909124;IPI00181753;IPI00182138	GRN	P28799-1;P28799;B4DJI2;Q53HQ8;Q540U8;B4E1G5;Q9H8S1;P28799-2	0.121407		1.09103	0.974162	1.8687	0.430217	2.13026	1.19302	1.9645	3.65203	1.34744	1	5	6	63.544	593	2.9	11.1	12.3	135.89	145.14	99.601				114.74	119.7	18.79	181.01	121.23	15.914	14546000	1996100	4957400	9995000	6494400	17302000	933140	2584700	1058400
Actin filament-binding protein frabin;FGD1-related F-actin-binding protein;FYVE, RhoGEF and PH domain-containing protein 4;Zinc finger FYVE domain-containing protein 6;cDNA FLJ55905, highly similar to FYVE, RhoGEF and PH domain-containing protein 4;cDNA FLJ56188, highly similar to FYVE, RhoGEF and PH domain-containing protein4	IPI00065435;IPI00429579	IPI00065435	FGD4;FRABP;ZFYVE6	Q96M96-1;Q96M96;B7Z493;B7Z8F9	0.212579		-2.14021	-1.39775	-2.88266		0.226847	0.172484	0.37952	0.135591		5	1	0	98.678	878	6.8	1	0	117.38	113.56	116.5	82.402	112.51	71.175	133.65	134.07	40.015				1764600	3512500	3441800	1080900	516660	519420	0	0	0
Actin regulatory protein CAP-G;Macrophage-capping protein;cDNA, FLJ94534, highly similar to Homo sapiens capping protein (actin filament), gelsolin-like(CAPG), mRNA;cDNA FLJ51488, highly similar to Macrophage capping protein;Putative uncharacterized protein CAPG	IPI00027341;IPI00848090;IPI00908511;IPI00916783;IPI00917562;IPI00917178	IPI00027341;IPI00848090;IPI00908511;IPI00916783;IPI00917562	AFCP;CAPG;MCP	P40121;B2R9S4;B4DU58;C9JA39;B8ZZS7;B8ZZL6	0.0168931	+	-2.00492	-1.64431	-2.51909	-1.85136	0.249149	0.0747515	0.3199	0.174453	0.277131	15	12	5	38.517	348	51.4	42.8	21.8	115.6	123.77	149.32	81.635	99.825	73.167	77.311	82.7	54.564	154.04	176.36	36.385	153890000	71298000	59804000	34395000	44417000	31763000	62786000	7682600	12289000
Actin, alpha cardiac muscle 1;Alpha-cardiac actin;cDNA FLJ78096, highly similar to Homo sapiens actin, alpha, cardiac muscle (ACTC), mRNA	IPI00023006;IPI00930343	IPI00023006;IPI00930343	ACTC;ACTC1	P68032;A8K3K1	0.0310816	+	3.78589	4.92567	3.86959	2.56243	13.7933	12.4117	30.393	14.6171	5.90702	41	45	44	42.019	377	66.3	71.4	75.1	158.49	148.46	240.35	97.705	114.1	186.31	134.37	141.17	149.88	193.07	167.24	128.68	46140000	173130000	336850000	656180000	1206900000	1557600000	93618000	365090000	562790000
Actin, cytoplasmic 2;Actin, cytoplasmic 2, N-terminally processed;Gamma-actin;cDNA FLJ57283, highly similar to Actin, cytoplasmic 2	IPI00021440;IPI00930226;IPI00790339;IPI00796881	IPI00021440;IPI00930226	ACTB;ACTG;ACTG1	P63261;B4E3A4	0.462098		-0.116757	-0.0562367	0.0708756	-0.364909	0.922259	0.139733	0.96177	1.05035	0.776518	54	51	48	41.792	375	81.3	80.5	85.1	112.78	110.12	75.638	96.056	78.146	46.59	70.503	111	101.21	177.05	139.72	37.108	6637600000	41802000000	13823000000	5948400000	13814000000	33374000000	1787500000	12162000000	8859900000
Actin-binding protein 280;Alpha-filamin;Endothelial actin-binding protein;Filamin-1;Filamin-A;Non-muscle filamin;Filamin A;FLNA protein;FLJ00119 protein;Filamin A, alpha (Actin binding protein 280)	IPI00333541;IPI00302592;IPI00644576;IPI00910863;IPI00552416;IPI00552858;IPI00893150	IPI00333541;IPI00302592;IPI00644576	FLN;FLN1;FLNA;FLJ00119;XX-FW83128A1.1-010	P21333-1;P21333;Q5HY55;Q60FE5;P21333-2;Q5HY53;Q60FE6;Q6NXF2;Q8TES4;Q5HY54;Q96C61	0.0330205	+	-1.3428	-1.09379	-1.8433	-1.09133	0.394253	0.109839	0.46853	0.278683	0.469329	181	157	114	280.74	2647	65.4	63.2	46.2	100.22	100.77	71.147	74.04	84.071	67.446	69.792	84.79	83.816	136.18	112.71	58.58	595050000	1531200000	606680000	483060000	640600000	1336400000	1192900000	5708900000	5300700000
Actin-depolymerizing factor;AGEL;Brevin;Gelsolin;cDNA FLJ56154, highly similar to Gelsolin;cDNA FLJ56212, highly similar to Gelsolin;cDNA, FLJ96557, Homo sapiens gelsolin (amyloidosis, Finnish type) (GSN), mRNA;Gelsolin (Amyloidosis, Finnish type);Gelsolin (Amyloidosis, Finnish type), isoform CRA_c;cDNA FLJ53332, highly similar to Gelsolin;Gelsolin (Amyloidosis, Finnish type), isoform CRA_b;Putat…	IPI00026314;IPI00647556;IPI00646773;IPI00796316;IPI00513782;IPI00641047;IPI00377087;REV__IPI00783066;REV__IPI00853432;REV__IPI00419958;REV__IPI00853539;REV__IPI00477405	IPI00026314;IPI00647556;IPI00646773;IPI00796316;IPI00513782	GSN;hCG_27454;RP11-477J21.1-001;RP11-477J21.1-003;DKFZp313L0718;RP11-477J21.1-013;RP11-477J21.1-010;RP11-477J21.1-005	P06396-1;P06396;B7Z6N2;B7Z9A0;Q5T0I2;B7Z373;B7Z5V1;Q5T0I1;Q69YR8;P06396-2;A2A418;B7Z4U6;B7Z992;B7Z2X4;Q5T0H8;B3KS49;Q5T0H9	0.0221404	+	1.95435	1.87334	1.48746	2.50226	3.87542	1.46838	3.6638	2.80395	5.66572	16	26	39	85.696	782	24.6	32.2	45.3	133.46	94.443	115.45	99.205	36.859	34.686	58.477	63.067	44.867	160.96	129.68	65.433	13613000	35946000	33073000	50403000	95659000	120090000	51674000	143270000	95719000
Actin-interacting protein 1;NORI-1;WD repeat-containing protein 1;Putative uncharacterized protein WDR1;WD repeat domain 1, isoform CRA_a;WD repeat-containing protein 1 isoform 1 variant;cDNA FLJ45763 fis, clone N1ESE2000698, highly similar to WD repeat protein 1;cDNA FLJ58303, highly similar to WD repeat protein 1	IPI00746165;IPI00873622;IPI00939854;IPI00903292;IPI00908482;IPI00909688;IPI00940664;IPI00556374;IPI00747236	IPI00746165;IPI00873622;IPI00939854;IPI00903292	WDR1;hCG_19377	O75083-1;O75083;A8MVA9;Q53GN4;Q53H17;Q59ER5;B3KXN4;O75083-3;B4DY05	0.0649331		0.678268	0.529571	0.465241	1.03999	1.60022	0.373254	1.4435	1.38055	2.05622	18	16	9	66.193	606	34.3	31.5	18	101.39	89.036	61.373	78.609	53.406	30.301	51.555	73.318	53.231	142.87	134.57	35.383	36753000	83206000	73448000	26946000	99994000	128750000	47106000	57948000	99409000
Actin-like protein 2;Actin-related protein 2;ACTR2 protein;cDNA FLJ51656, highly similar to Actin-like protein 2;cDNA FLJ51655, highly similar to Actin-like protein 2	IPI00005159;IPI00470573;IPI00909247;IPI00176593	IPI00005159;IPI00470573;IPI00909247	ACTR2;ARP2	P61160;Q8IY98;B4DHK9;B4DWQ5	0.0585393		0.686209	0.646808	0.406904	1.00491	1.60905	0.345414	1.5657	1.32584	2.00682	15	12	12	44.76	394	31.2	31.5	28.2	116.7	110.63	62.702	94.008	80.5	32.632	85.443	90.095	28.968	234.91	209.74	18.678	58423000	66199000	49184000	53411000	90516000	109630000	29239000	85767000	74973000
Actin-like protein 3;Actin-related protein 3;cDNA FLJ51082, highly similar to Actin-like protein 3;cDNA FLJ52521, highly similar to Actin-like protein 3;cDNA FLJ51148, highly similar to Actin-like protein 3;cDNA FLJ52434, highly similar to Actin-like protein 3;cDNA, FLJ79112, highly similar to Actin-like protein 3;cDNA, FLJ79295, highly similar to Actin-like protein 3;ARP3 actin-related protein 3…	IPI00028091;IPI00908396;IPI00007068;IPI00892652;IPI00554433;IPI00642069;IPI00888282;IPI00946655;IPI00936769;IPI00916540;IPI00916399	IPI00028091	ACTR3;ARP3;hCG_26669	P61158;B4DT29;B4DTI0;B4DXW1;Q53QM2;Q59FV6	0.312296		0.4095	0.634036	-0.195222	0.789686	1.32823	0.451486	1.5519	0.873439	1.7287	19	16	10	47.371	418	48.1	41.9	28.2	114.78	91.64	48.273	66.32	72.708	26.177	79.291	79.903	22.512	112.12	127.57	17.424	21712000	80556000	65573000	82935000	191560000	161670000	22169000	81214000	63054000
Actin-related protein 10;Actin-related protein 11;cDNA, FLJ96603, highly similar to Homo sapiens actin-related protein 10 homolog (S. cerevisiae) (ACTR10), mRNA;ACTR10 protein;Uncharacterized hypothalamus protein HARP11 variant;Full-length cDNA clone CS0DJ008YJ17 of T cells (Jurkat cell line) of Homo sapiens (human);Full-length cDNA clone CS0DI035YL21 of Placenta of Homo sapiens (human)	IPI00302690	IPI00302690	ACTR10;ACTR11;ARP11	Q9NZ32;B2RDG9;Q05DQ7;Q53H79;Q53HF6;Q86SY7;Q86TY2	0.319763		0.939661	1.72045	1.58879	-0.490262	1.91808	1.41593	3.2954	3.00797	0.711896	1	2	1	46.306	417	2.2	5	2.9	133.21	127.75	183.48				16.703	62.637	19.93				66338	395890	1838300	804610	5189700	6913700	207240	709180	3632000
Actin-related protein 2/3 complex subunit 1A;SOP2-like protein;Actin related protein 2/3 complex subunit 1A variant;Putative uncharacterized protein ARPC1A;cDNA FLJ57124, highly similar to Actin-related protein 2/3 complex subunit 1A	IPI00333068;IPI00926706;IPI00909730;IPI00927330	IPI00333068;IPI00926706;IPI00909730	ARPC1A;SOP2L	Q92747;A4D276;Q53GB6;Q59GQ0;Q75MY0;B4DLQ7	0.0267465	+	1.42431	1.22651	1.14877	1.89765	2.68386	0.837929	2.34	2.21725	3.72606	2	2	1	41.569	370	9.2	7.3	4.6	142.93	146.33	124.91	90.969	62.531	8.0528	267.64	231.89	25.623				2180200	2897600	7474900	71985000	14054000	10974000	800880	1688900	2389600
Actin-related protein 2/3 complex subunit 1B;Arp2/3 complex 41 kDa subunit;p41-ARC;Actin related protein 2/3 complex, subunit 1B, 41kDa;Actin related protein 2/3 complex, subunit 1B, 41kDa, isoform CRA_a;cDNA, FLJ95695, Homo sapiens actin related protein 2/3 complex, subunit 1B, 41kDa(ARPC1B), mRNA	IPI00005160;IPI00737530;IPI00927418;IPI00925033;IPI00924615;IPI00927612;IPI00927861;IPI00927206;IPI00925248;IPI00925800;IPI00924861	IPI00005160;IPI00737530;IPI00927418	ARC41;ARPC1B;hCG_19475;tcag7.662	O15143;A4D275;C9J0Z8	0.184774		-0.782009	-1.06428	-1.27584	-0.00590296	0.581556	0.319397	0.47821	0.412984	0.995917	6	4	3	40.949	372	16.1	13.7	7.3	72.65	81.301	76.926	20.758	28.84	11.417	81.392	72.4	40.778	11.279	161.16	24.829	2199100	6396200	1500300	10022000	6678300	7230600	801170	2619800	3391600
Actin-related protein 2/3 complex subunit 2;Arp2/3 complex 34 kDa subunit;Actin related protein 2/3 complex, subunit 2, 34kDa, isoform CRA_a;cDNA FLJ76076, highly similar to Homo sapiens actin related protein 2/3 complex, subunit 2, 34kDa (ARPC2), transcript variant 2, mRNA;Putative uncharacterized protein ARPC2;PNAS-139	IPI00005161;IPI00000477;IPI00927156;IPI00925920;IPI00926315;IPI00925705	IPI00005161;IPI00000477	ARC34;ARPC2;PRO2446;hCG_16304	O15144;Q53R19;Q9BXV5	0.172609		0.616213	0.928806	0.0250009	0.894832	1.53285	0.49936	1.9037	1.01748	1.85939	5	9	4	34.333	300	14.3	37	9.3	72.203	70.144	62.815	110.54	84.113	37.82	30.989	49.54	24.15	259.99	138.93	55.284	909210	1929900	3189900	7268200	32715000	20700000	9111100	4079800	9404600
Actin-related protein 5;Sarcoma antigen NY-SAR-16	IPI00292787	IPI00292787	ACTR5;ARP5	Q9H9F9	0.224694		0.28421	0.388906	0.179515		1.21774	0.125085	1.3094	1.1325		2	1	0	68.297	607	1.8	1.5	0	98.213	84.749	63.77	116.87	52.713	0.21534							1915100	1224100	2646100	2027000	1576500	17753000	0	0	0
Actin-RPV;Alpha-centractin;ARP1;Centrosome-associated actin homolog;cDNA FLJ52695, highly similar to Alpha-centractin;cDNA FLJ52800, highly similar to Alpha-centractin;cDNA FLJ55002, highly similar to Alpha-centractin	IPI00029468;IPI00908883	IPI00029468;IPI00908883	ACTR1A;CTRN1	P61163;B4DMT4;B4DXP9;B4DM97	0.010864	+	1.56662	1.80995	1.25284	1.63706	2.9621	0.569678	3.5063	2.38311	3.11032	9	9	7	42.613	376	34.6	35.9	23.4	118.33	119.22	130.09	61.905	56.781	27.24	53.034	67.455	31.87	194.67	189.17	26.977	21342000	46778000	95036000	35565000	115400000	148450000	18066000	13626000	24645000
Activated leukocyte cell adhesion molecule;CD166 antigen;cDNA FLJ30070 fis, clone ASTRO2000046, highly similar to CD166 ANTIGEN;cDNA FLJ59249, highly similar to CD166 antigen;cDNA, FLJ79012, highly similar to CD166 antigen;Activated leukocyte cell adhesion molecule soluble isoform;ALCAM protein;cDNA FLJ52980, highly similar to CD166 antigen	IPI00015102;IPI00944977;IPI00807403;IPI00791964;IPI00795504;IPI00945338;IPI00748835	IPI00015102;IPI00944977;IPI00807403;IPI00791964;IPI00795504	ALCAM;MEMD	Q13740-1;Q13740;B3KNN9;B4DTU0;Q13740-2;Q6PEY4;B4DX43	0.128945		1.19316	1.70841	0.242772	1.6283	2.28653	1.15604	3.268	1.18326	3.09148	3	7	4	65.102	583	5.8	17.7	8.1	154.28	135.24	80.153	225.37	179.74	24.332	149.93	134.74	33.608	138.19	176.72	30.022	592990	2505700	3663500	2554400	6689000	9066800	584370	4204000	6313400
Activated protein C receptor;Endothelial cell protein C receptor;Endothelial protein C receptor	IPI00009276	IPI00009276	EPCR;PROCR	Q9UNN8	0.0418865	+	-1.27481	-0.74468	-1.62368	-1.45607	0.41328	0.147033	0.5968	0.324507	0.364485	3	4	1	30.715	275	14.2	17.8	6.2	128.63	96.584	158.01	69.567	55.266	76.479	24.622	26.305	18.186				4544800	6091600	7232100	2247900	12162000	4454000	223190	940930	442180
Activating signal cointegrator 1 complex subunit 3-like 1;BRR2 homolog;U5 small nuclear ribonucleoprotein 200 kDa helicase;U5 snRNP-specific 200 kDa protein;SNRNP200 protein;cDNA FLJ55548, highly similar to U5 small nuclear ribonucleoprotein 200 kDa helicase (EC 3.6.1.-);cDNA FLJ13778 fis, clone PLACE4000431, highly similar to H.sapiens U5 snRNP-specific 200kD protein;PRO2281;Putative RNA helicase	IPI00420014;IPI00740142;IPI00953667;IPI00168235;IPI00927472;IPI00937839;IPI00735397	IPI00420014;IPI00740142	ASCC3L1;HELIC2;KIAA0788;SNRNP200	O75643-1;O75643;A2RRQ7;A4FU77;B4E150;Q5ZF01;Q7L5W4;Q9H8B9;Q9P172;Q9UNV9	0.148529		-0.40573	-0.373589	-0.72657	-0.11703	0.754854	0.158951	0.77186	0.604339	0.922084	27	21	3	244.5	2136	14.1	11.5	1.8	102.98	100.23	38.688	107.28	102.92	51.448	86.646	101.14	44.654	106.2	101.6	55.102	8493700	25656000	26696000	21426000	101010000	62031000	8066100	57324000	11432000
Activating transcription factor 7-interacting protein 1;ATFa-associated modulator;ATF-interacting protein;MBD1-containing chromatin-associated factor 1;P621;cDNA FLJ14669 fis, clone NT2RP2003243, highly similar to Homo sapiens activating transcription factor 7 interacting protein (ATF7IP), mRNA;cDNA FLJ90387 fis, clone NT2RP2005391, highly similar to Homo sapiens activating transcription factor 7…	IPI00795654;IPI00796928;IPI00794198;IPI00796299	IPI00795654;IPI00796928;IPI00794198;IPI00796299	ATF7IP;MCAF;MCAF1	Q6VMQ6-1;Q6VMQ6;B3KNI7;B3KQF8;Q6VMQ6-2;Q6VMQ6-3;B4DRL6;B4E2A2;A8MV73	0.380493		-0.758957	-0.242311	-1.2756		0.590923	0.305709	0.84539	0.413052		2	1	0	136.42	1270	3.3	1	0	96.247	70.996	58.042	32.196	43.286	11.071							510050	1500200	1022900	491020	2127500	529410	0	0	0
Activator 1 36 kDa subunit;Activator 1 subunit 5;Replication factor C 36 kDa subunit;Replication factor C subunit 5;cDNA FLJ76127, highly similar to Homo sapiens replication factor C (activator 1) 5, 36.5kDa (RFC5), transcript variant 1, mRNA;Replication factor C 5 isoform 1 variant;RFC5 protein;cDNA FLJ77120, highly similar to Homo sapiens replication factor C (activator 1) 5, 36.5kDa (RFC5), tr…	IPI00031514;IPI00373883;IPI00925306;IPI00908568;IPI00924976	IPI00031514;IPI00373883;IPI00925306;IPI00908568	RFC5	P40937;A8K3S0;Q59GW7;Q6LES9;A8K4Z2;A8MZ62	0.161866		-0.949576	-0.702797		-1.19636	0.517785	0.125868	0.61438		0.436376	3	0	2	38.496	340	10	0	5.3	71.228	92.477	71.389	83.611	78.752	39.303				58.392	30.712	27.68	1022100	4702500	1733000	0	0	0	165990	5512200	7830900
Activator 1 37 kDa subunit;Activator 1 subunit 4;Replication factor C 37 kDa subunit;Replication factor C subunit 4;Putative uncharacterized protein RFC4;cDNA FLJ60688, highly similar to Replication factor C subunit 4;Replication factor C (Activator 1) 4, 37kDa, isoform CRA_b	IPI00017381;IPI00925945;IPI00792595;IPI00924613;IPI00925397;IPI00795756;IPI00925227;IPI00924737;IPI00927827;IPI00925652	IPI00017381;IPI00925945;IPI00792595;IPI00924613;IPI00925397	RFC4;hCG_2021077	P35249;C9JZI1;B4DM41;C9J8M3;C9JTT7	0.476062		-0.772675	-1.48932	-0.0560285		0.585331	0.428315	0.35618	0.961908		8	8	1	39.681	363	19.6	26.2	4.4	123.24	127.43	55.722	84.702	85.645	31.838	109.49	123.94	50.072				10556000	6361600	3688500	10799000	32941000	6954800	0	0	144160
Activator 1 38 kDa subunit;Activator 1 subunit 3;Replication factor C 38 kDa subunit;Replication factor C subunit 3;cDNA FLJ60629, highly similar to Replication factor C subunit 3;Replication factor C 3 isoform 1 variant;Replication factor C (Activator 1) 3, 38kDa;Putative uncharacterized protein RFC3	IPI00031521;IPI00373882;IPI00940107	IPI00031521;IPI00373882;IPI00940107	RFC3	P40938;B4DKE6;Q53HK8;Q5U0C2;C9JU95;A8MX32	0.222488		-0.738838	-1.0081	-0.469573		0.599222	0.159084	0.4972	0.722178		6	7	0	40.556	356	19.7	23.6	0	118.03	118.78	71.026	42.791	85.077	69.167	119.35	134.79	35.773				1839400	3037100	1124300	8904400	30519000	17169000	0	0	0
Activator 1 40 kDa subunit;Activator 1 subunit 2;Replication factor C 40 kDa subunit;Replication factor C subunit 2;Replication factor C 2 isoform 1;Putative uncharacterized protein RFC2;Replication factor C (Activator 1) 2, 40kDa;Replication factor C (Activator 1) 2, 40kDa, isoform CRA_a	IPI00017412;IPI00218280;IPI00947280;IPI00947452;IPI00944904;IPI00945248;IPI00947011;IPI00947438;IPI00945072;IPI00946644	IPI00017412;IPI00218280	RFC2;hCG_18034	P35250-1;P35250;B5BUD2;P35250-2;Q75MT5	0.126781		-1.39581	-1.10647	-0.619929	-2.46103	0.380032	0.236193	0.46443	0.650703	0.181617	2	4	1	39.157	354	9.9	17.2	4.8	112.75	100.19	56.989	107.76	59.969	43.847	53.605	54.393	16.223				5501800	2968200	3682700	5816100	24883000	4992800	348240	395210	296970
Activator of 90 kDa heat shock protein ATPase homolog 1;p38;cDNA FLJ56675, highly similar to Activator of 90 kDa heat shock protein ATPase homolog 1	IPI00030706	IPI00030706	AHSA1;C14orf3;HSPC322	O95433;B2R9L2;B4DUR9	0.0650057		0.901068	0.681314	0.638097	1.38379	1.86745	0.594909	1.6036	1.55627	2.60954	8	7	4	38.274	338	23.1	25.7	16	114.07	127.99	98.494	139.03	154.69	29.69	77.066	86.423	19.686	188.74	99.724	35.78	18649000	60465000	36311000	18942000	78850000	109050000	1957500	6876900	4161000
Activator of G-protein signaling 3;G-protein-signaling modulator 1	IPI00479065;IPI00941917;IPI00790150;IPI00939203;IPI00328379;IPI00642575;IPI00883886;IPI00004948	IPI00479065;IPI00941917;IPI00790150;IPI00939203	AGS3;GPSM1	Q86YR5-1;Q86YR5;Q86YR5-3	0.211839		2.57713	3.4678		1.68645	5.9675	5.54751	11.064		3.21864	1	0	3	74.509	675	1.8	0	5.8	150.5	175.71	217.22							30.237	11.63	18.607	686210	1149500	389700	0	0	0	341320	224670	37046
Activator of RNA decay;ARD-1;Nuclear inhibitor of protein phosphatase 1;Protein phosphatase 1 regulatory inhibitor subunit 8;Protein phosphatase 1, regulatory (Inhibitor) subunit 8;cDNA FLJ77357, highly similar to Homo sapiens protein phosphatase 1, regulatory (inhibitor) subunit 8 (PPP1R8), transcript variant 1, mRNA;Protein phosphatase 1, regulatory (Inhibitor) subunit 8, isoform CRA_b;Protein …	IPI00030383;IPI00655724;IPI00142629;IPI00645094;IPI00911009;IPI00218794;REV__IPI00552371	IPI00030383;IPI00655724;IPI00142629;IPI00645094	ARD1;NIPP1;PPP1R8;hCG_2032356;RP4-547C9.1-001	Q12972-1;Q12972;Q561W4;Q5TEJ4;Q38J66;Q12972-2;Q5TEJ2	0.247839		0.888268	0.523863		1.25267	1.85095	0.668233	1.4378		2.38282	4	0	4	38.478	351	14.8	0	19.9	144.86	167.5	82.024	75.439	77.593	28.616				146.31	99.941	45.515	995850	4386500	9391400	0	0	0	488630	1658400	2459600
Activator-recruited cofactor 42 kDa component;Acyl-CoA dehydrogenase family member 8;Isobutyryl-CoA dehydrogenase, mitochondrial;cDNA FLJ59971, highly similar to Acyl-CoA dehydrogenase family member 8, mitochondrial (EC 1.3.99.-);cDNA FLJ55244, highly similar to Acyl-CoA dehydrogenase family member 8, mitochondrial (EC 1.3.99.-);Acyl-Coenzyme A dehydrogenase family, member 8 variant;Acyl-Coenzyme…	IPI00747159;IPI00922810;IPI00556276;IPI00446874;IPI00922442;IPI00922781;IPI00445796	IPI00747159;IPI00922810;IPI00556276;IPI00446874;IPI00922442	ACAD8;ARC42;IBD;hCG_37259	Q9UKU7;B7Z644;B7Z5W4;Q59FC2;Q6ZWP6;B7Z7F1	0.235534		-0.208005	-0.357659	-0.304511	0.0381545	0.865733	0.134586	0.78043	0.809717	1.0268	4	7	2	45.069	415	13	21	4.1	134.26	111.43	66.389	118.04	111.73	12.35	76.381	69.357	13.132	26.028	42.079	16.051	7926900	7524600	7649600	18355000	41104000	7740700	2402700	1351500	8965600
Activity-dependent neuroprotective protein;Activity-dependent neuroprotector homeobox protein;cDNA, FLJ95596, highly similar to Homo sapiens activity-dependent neuroprotector (ADNP), mRNA;Activity-dependent neuroprotector homeobox	IPI00022215	IPI00022215	ADNP;ADNP1;KIAA0784	Q9H2P0;B2RBM8;Q6DHZ8	0.644007		0.915173	-0.547172		2.37752	1.8858	3.19051	0.68436		5.19642	4	0	4	123.56	1102	4.8	0	6.2	113.63	117.68	123.94	38.16	119.82	87.358				142.03	64.694	129.46	1724300	3030900	2910900	0	0	0	7203000	10731000	12454000
Acute morphine dependence-related protein 2;CCT-zeta-1;HTR3;T-complex protein 1 subunit zeta;Tcp20;Chaperonin subunit 6A;cDNA, FLJ94440, highly similar to Homo sapiens chaperonin containing TCP1, subunit 6A (zeta 1)(CCT6A), mRNA;cDNA FLJ52344, highly similar to T-complex protein 1 subunit zeta;cDNA, FLJ79129, highly similar to T-complex protein 1 subunit zeta;Chaperonin containing TCP1, subunit 6…	IPI00027626;IPI00552590;REV__IPI00021129;REV__IPI00296545;REV__IPI00926242	IPI00027626;IPI00552590	CCT6;CCT6A;CCTZ	P40227;A1JUI8;B2R9K8;B4DPJ8;Q59ET3;A6NCD2;B4DN39	0.0521793		0.527111	0.630406	0.277604	0.673325	1.44104	0.208692	1.548	1.21218	1.59474	27	23	25	58.024	531	55.6	52	46.3	134.72	112.98	90.14	98.759	87.187	28.305	92.074	126.45	63.258	164.44	152.49	31.528	73010000	518350000	251730000	196000000	728630000	640360000	244580000	589230000	669050000
Acute-phase response factor;Signal transducer and activator of transcription 3;cDNA FLJ78360, highly similar to Homo sapiens signal transducer and activator of transcription 3 (acute-phase response factor) (STAT3), transcript variant 1, mRNA;cDNA FLJ59362, highly similar to Signal transducer and activator of transcription 3;cDNA FLJ53413, highly similar to Signal transducer and activator of trans…	IPI00784414;IPI00306436;IPI00412752	IPI00784414;IPI00306436;IPI00412752	APRF;STAT3	P40763-1;P40763;A8K7B8;B4DNP0;B4DVR6;B5BTZ6;B7ZA24;Q9BXH2;P40763-2	0.358359		0.310667	0.114634	0.506701		1.24028	0.239071	1.0827	1.4208		3	6	0	88.067	770	6	11.7	0	98.622	104.17	59.253	141.84	88.369	56.328	75.7	85.226	50.397				6910900	2070500	1894500	3928000	22433000	12604000	0	0	0
Acyl-CoA dehydrogenase family member 10	IPI00914926;IPI00418639;IPI00843833;IPI00843880;IPI00794149;IPI00788887;IPI00797832	IPI00914926;IPI00418639;IPI00843833;IPI00843880	ACAD10	Q6JQN1-1;Q6JQN1;Q6JQN1-2;Q6JQN1-4	0.500724		-0.696437	0.0015861	-1.39446		0.617095	0.43891	1.0011	0.380387		6	2	0	122.34	1090	7	2.7	0	87.096	126.07	124.19	34.04	89.725	92.974							3568600	5718300	10509000	1140600	5839800	2918800	0	0	0
Acyl-CoA dehydrogenase family member 9, mitochondrial;Acyl-Coenzyme A dehydrogenase family, member 9 variant;Acyl-Coenzyme A dehydrogenase family, member 9, isoform CRA_b;cDNA FLJ12506 fis, clone NT2RM2001700, weakly similar to ACYL-COA DEHYDROGENASE, VERY-LONG-CHAIN SPECIFIC (EC 1.3.99.-);cDNA FLJ53144, highly similar to Acyl-CoA dehydrogenase family member 9, mitochondrial (EC 1.3.99.-)	IPI00152981;IPI00790834;IPI00789507;IPI00910925;IPI00790871;IPI00790269	IPI00152981;IPI00790834	ACAD9;hCG_2022772	Q9H845;Q59FN3;Q9H9W4	0.670653		-0.111037	0.333309	-0.270589	-0.395831	0.925922	0.270891	1.2599	0.828981	0.760052	7	5	1	68.76	621	16.9	10.8	4	102.87	88.415	68.701	76.508	90.556	31.538	138.72	79.286	168.83				8681500	20644000	19908000	5612100	21437000	11888000	141980	672320	1492800
Acyl-CoA synthetase 1;Long-chain acyl-CoA synthetase 1;Long-chain acyl-CoA synthetase 2;Long-chain fatty acid-CoA ligase 2;Long-chain-fatty-acid--CoA ligase 1;Palmitoyl-CoA ligase 1;Palmitoyl-CoA ligase 2;cDNA FLJ76467, highly similar to Homo sapiens acyl-CoA synthetase long-chain family member 1 (ACSL1), mRNA;cDNA FLJ59311, highly similar to Long-chain-fatty-acid--CoA ligase 1 (EC 6.2.1.3);cDNA …	IPI00012728;IPI00942534;IPI00401448;IPI00815946;IPI00401990;IPI00008037;IPI00854706;IPI00411387;IPI00100426	IPI00012728;IPI00942534;IPI00401448	ACSL1;FACL1;FACL2;LACS;LACS1;LACS2	P33121-1;P33121;A8K9T3;B7Z452;B4E0R0;B7Z3Z9;P33121-2;Q108N1	0.0161578	+	1.20867	1.2679	0.914603	1.44352	2.31125	0.421825	2.4081	1.88505	2.71983	2	5	2	77.942	698	2.7	7.7	2.7	109.11	110.05	73.113				64.501	57.875	18.221	45.15	226.18	7.0483	3541800	1810400	6548900	5661400	24639000	15261000	98251	321190	469860
Acyl-CoA synthetase short-chain family member 2;Acyl-CoA synthetase short-chain family member 2, isoform CRA_f;Putative uncharacterized protein ACSS2;cDNA FLJ34962 fis, clone NTONG2003897, highly similar to Homo sapiens acetyl-CoA synthetase mRNA;Acetate--CoA ligase;Acetyl-CoA synthetase;Acetyl-coenzyme A synthetase, cytoplasmic;Acyl-activating enzyme;Putative uncharacterized protein DKFZp762G026…	IPI00549564;IPI00413730;IPI00873455;IPI00946252;IPI00909325;IPI00946173;IPI00945466;IPI00946160;IPI00945873;IPI00946400	IPI00549564;IPI00413730;IPI00873455	ACSS2;hCG_38506;RP5-1161H23.2-006;ACAS2;DKFZp762G026	Q5QPH3;Q8N238;Q9NR19;Q68CU9;B3KUV2;Q4G0E8;Q6DKJ3;Q96FY7;Q9H9U4	0.071888		2.38001		2.11011	2.64991	5.2054	1.38526		4.31723	6.27628	0	2	1	80.087	714	0	4.9	1.3	151.48	139.4	188.25				64.151	32.561	47.425	371.76	61.197	54.271	0	0	0	1931000	1593500	4133900	954790	1935800	1608600
Acyl-CoA synthetase short-chain family member 3, mitochondrial	IPI00002245;IPI00795694;IPI00791989	IPI00002245	ACSS3	Q9H6R3-1;Q9H6R3	0.307908		-0.761588	-0.361546	-1.16163		0.589847	0.234281	0.77833	0.447007		4	3	0	74.777	686	5.7	5.7	0	98.745	93.767	86.361	66.033	60.549	118.88	37.186	58.664	11.9				2773700	3967300	5511800	2463000	8048800	2234600	0	0	0
Acyl-CoA thioester hydrolase 9;Acyl-coenzyme A thioesterase 9, mitochondrial;ACOT9 protein	IPI00220710;IPI00646015;IPI00921986;IPI00748985;IPI00945736;IPI00945678;IPI00639932;IPI00647609	IPI00220710;IPI00646015;IPI00921986;IPI00748985;IPI00945736	ACOT9;CGI-16	Q9Y305-1;Q9Y305;Q96EA2;Q9Y305-2;Q9Y305-3;C9JMV6	0.0382261	+	-0.808985	-0.551226	-0.765365	-1.11036	0.570783	0.109996	0.68244	0.588305	0.463177	12	13	4	49.901	439	31.9	36.7	12.1	119.78	89.608	105.42	76.375	87.002	43.774	99.467	104.06	49.442	184.03	103.57	42.994	24169000	30071000	31065000	31819000	71313000	36933000	16034000	40122000	8698200
Acyl-CoA thioesterase 7;Brain acyl-CoA hydrolase;CTE-IIa;Cytosolic acyl coenzyme A thioester hydrolase;Long chain acyl-CoA thioester hydrolase;cDNA FLJ32606 fis, clone STOMA1000186, highly similar to Homo sapiens acyl-CoA thioesterase 7 (ACOT7), transcript variant hBACHa, mRNA;cDNA FLJ52849, highly similar to Homo sapiens acyl-CoA thioesterase 7 (ACOT7), transcript variant hBACHc, mRNA;cDNA FLJ60…	IPI00010415;IPI00395748;IPI00219451;IPI00219452	IPI00010415;IPI00395748;IPI00219451;IPI00219452	ACOT7;BACH	O00154-1;O00154;O00154-4;B3KQ12;O00154-5;B7Z957;O00154-6;B4DUX0	0.533912		-0.252841	0.380064	-0.356933	-0.781653	0.839242	0.371622	1.3014	0.780823	0.5817	6	5	2	41.796	380	21.6	19.5	7.6	118.17	110.41	40.941	45.832	45.506	27.529	77.614	83.53	11.263	225.28	202.24	14.349	7150200	28906000	21433000	27379000	51574000	61142000	801220	2384900	3566600
Acyl-CoA thioesterase 7;Brain acyl-CoA hydrolase;CTE-IIa;Cytosolic acyl coenzyme A thioester hydrolase;Long chain acyl-CoA thioester hydrolase;Putative uncharacterized protein ACOT7	IPI00746126;IPI00395469;IPI00883762	IPI00746126;IPI00395469;IPI00883762	ACOT7;BACH	O00154-3;O00154;C9JFC4;O00154-2	0.521019		-0.177595	0.160791	-0.0765591	-0.617016	0.884176	0.235796	1.1179	0.948317	0.652018	6	5	3	30.977	283	28.6	25.8	15.5	95.642	80.651	75.179							26.258	33.154	6.8958	148820	5085000	966710	337090	2121100	4165600	957440	3938300	4111000
Acyl-CoA-binding domain-containing protein 3;Golgi complex-associated protein 1;Golgi phosphoprotein 1;Golgi resident protein GCP60;PBR- and PKA-associated protein 7;Peripheral benzodiazepine receptor-associated protein PAP7	IPI00009315	IPI00009315	ACBD3;GCP60;GOCAP1;GOLPH1	Q9H3P7	0.167321		-0.755737	-1.03955	-1.17817	-0.0494914	0.592244	0.290732	0.48648	0.441911	0.966277	7	5	6	60.593	528	18.9	14.8	18.9	90.806	86.398	82.541	131.02	85.414	36.683	19.399	26.784	17.851	184.66	66.959	26.66	15296000	14496000	10405000	2316600	13992000	5497000	236760	854190	1807100
Acyl-coenzyme A thioesterase 1;CTE-I;CTE-Ib;Inducible cytosolic acyl-coenzyme A thioester hydrolase;Long chain acyl-CoA thioester hydrolase;Acyl-CoA thioesterase 1;cDNA FLJ54503, highly similar to Acyl-coenzyme A thioesterase 1 (EC 3.1.2.2);Putative uncharacterized protein	IPI00333838;IPI00922628;IPI00513928;IPI00930396	IPI00333838;IPI00922628	ACOT1;CTE1	Q86TX2;A1L172;B4DV16;B7ZMC1	0.00376962	+	2.58075	2.29916	2.59396	2.84913	5.98251	1.14207	4.9217	6.03755	7.20565	4	7	6	46.277	421	14.3	24.5	17.3	130.7	124.95	132.28	111.78	105.95	26.715	67.619	49.147	46.991	137.25	106	91.002	1661500	7178300	6287800	35037000	15844000	37340000	42292000	48533000	63644000
Acylglycerol kinase, mitochondrial;Multiple substrate lipid kinase;Multiple substrate lipid kinase, isoform CRA_a;Putative uncharacterized protein FLJ10842;cDNA FLJ61206, highly similar to Homo sapiens multiple substrate lipid kinase (MULK), mRNA;cDNA FLJ59963, highly similar to Homo sapiens multiple substrate lipid kinase (MULK), mRNA	IPI00019353;IPI00946597;IPI00945912	IPI00019353;IPI00946597;IPI00945912	AGK;MULK;FLJ10842;hCG_39451;tcag7.330	Q53H12-1;Q53H12;A4D1U5;B4E2Z8;B4DR72	0.196894		-1.00709	-0.685292	-1.32889		0.497548	0.158255	0.62188	0.398073		4	1	0	47.137	422	9	2.1	0	95.308	99.299	81.078	68.93	43.341	16.329	28.267	27.304	0.96895				1331600	4440500	2583900	146060	420950	720630	0	0	0
Acyl-protein thioesterase 2;Lysophospholipase II	IPI00027032;IPI00646978;IPI00513881;IPI00514798;IPI00514267;IPI00644956;IPI00876921;IPI00903282	IPI00027032;IPI00646978;IPI00513881	APT2;LYPLA2;RP5-886K2.5-010;RP5-886K2.5-007	O95372;Q5QPQ0;Q5QPQ1	0.0380727	+	0.572254		0.606518	0.53799	1.48684	0.0499444		1.52258	1.45195	0	4	3	24.737	231	0	15.6	12.6	115.47	128.82	95.433				63.045	66.937	21.458	153.34	128.87	29.102	0	0	0	8667200	49434000	12222000	5347700	5332900	14552000
ADABP;Adenosine deaminase complexing protein 2;Dipeptidyl peptidase 4;Dipeptidyl peptidase 4 membrane form;Dipeptidyl peptidase 4 soluble form;Dipeptidyl peptidase IV;Dipeptidyl peptidase IV membrane form;Dipeptidyl peptidase IV soluble form;T-cell activation antigen CD26;TP103;Dipeptidyl-peptidase 4 (CD26, adenosine deaminase complexing protein 2), isoform CRA_a;Dipeptidylpeptidase IV;Putative u…	IPI00018953;IPI00924974;IPI00927124;IPI00924746	IPI00018953	ADCP2;CD26;DPP4;hCG_39008	P27487;Q53TN1	0.611777		0.705284	2.71088	0.792282	-1.38731	1.63047	3.24077	6.5472	1.73181	0.382278	5	9	2	88.278	766	6.5	10.8	3.1	85.682	72.464	116.06	55.852	39.077	13.097	60.326	70.344	23.204	100.12	80.231	32.553	31899000	34278000	30800000	7577100	17656000	18259000	394980	566980	840320
Adapter molecule crk;p38;Proto-oncogene c-Crk	IPI00004838;IPI00399054	IPI00004838;IPI00399054	CRK	P46108-1;P46108;B0LPE8;P46108-2	0.0316839	+	1.87918	1.53715	1.53583	2.56456	3.67866	1.74064	2.9022	2.89956	5.91576	4	4	5	33.83	304	18.4	18.8	32.9	122.41	136.95	176.1	26.831	38.205	14.038	30.495	44.51	23.261	168.92	178.05	57.061	2088600	3127900	12131000	3493800	3941200	20399000	7220600	5761700	5437600
Adapter protein CMS;Cas ligand with multiple SH3 domains;CD2-associated protein	IPI00412771	IPI00412771	CD2AP	Q9Y5K6	0.171716		-1.54956	-0.738698	-3.02972	-0.880255	0.341615	0.260638	0.59928	0.122451	0.543272	5	3	2	71.45	639	7.8	6.6	4.9	144.42	129.25	116.75	51.083	80.365	66.967	20.541	71.759	26.53	13.87	80.818	107.92	20577000	10754000	20933000	3203800	5479200	2397800	451130	1513200	705140
Adapter protein GRB2;Growth factor receptor-bound protein 2;Protein Ash;SH2/SH3 adapter GRB2;cDNA, FLJ96637, Homo sapiens growth factor receptor-bound protein 2 (GRB2), mRNA;Growth factor receptor-bound protein 2, isoform CRA_a;cDNA FLJ33691 fis, clone BRAWH2002976, highly similar to GROWTH FACTOR RECEPTOR-BOUND PROTEIN 2;GRB2 protein	IPI00021327;IPI00218070;IPI00792746;IPI00790124	IPI00021327;IPI00218070;IPI00792746	ASH;GRB2;hCG_27179	P62993-1;P62993;B0LPF3;B3KR50;Q6ICN0;P62993-2	0.929088		-0.0779061		-0.774418	0.618606	0.947432	0.672293		0.584624	1.53539	0	5	4	25.206	217	0	28.6	12	143.89	138.86	67.462				55.452	60.289	32.44	429.03	356.67	19.769	0	0	0	2340300	24957000	12727000	112490000	5659100	16333000
Adapter protein HOFI;Factor for adipocyte differentiation 49;SH3 and PX domain-containing protein 2B	IPI00023832	IPI00023832	FAD49;KIAA1295;SH3PXD2B	A1X283	0.387989		0.772695	0.233275		1.31212	1.70846	0.92458	1.1755		2.48305	3	0	2	101.58	911	3.7	0	4.5	136.53	169.91	100.54	85.865	103.37	55.903				52.52	96.861	45.061	1911500	3077600	5616700	0	0	0	511280	1046700	637810
Adapter-related protein complex 1 subunit beta-1;Adaptor protein complex AP-1 subunit beta-1;AP-1 complex subunit beta-1;Beta-1-adaptin;Beta-adaptin 1;Clathrin assembly protein complex 1 beta large chain;Golgi adaptor HA1/AP1 adaptin beta subunit;cDNA FLJ56967, highly similar to Adapter-relatedprotein complex 1 beta-1 subunit;cDNA FLJ56828, highly similar to Adapter-relatedprotein complex 1 beta-…	IPI00328257;IPI00953658;IPI00413947;IPI00946351;IPI00385007;IPI00788911	IPI00328257;IPI00953658;IPI00413947;IPI00946351	ADTB1;AP1B1;BAM22;CLAPB2	Q10567-1;Q10567;B4DG47;B4DS79;C9JRD1;Q10567-2;C9J1E7	0.272531		0.336531	0.351515	-0.0594937	0.717572	1.26272	0.342737	1.2759	0.959601	1.64441	16	15	4	104.61	949	19.8	17	4.2	112.97	94.635	59.453	101.45	97.421	35.746	55.705	66.589	37.591	24.055	67.729	16.885	25805000	19428000	24431000	6602400	27407000	29447000	1401600	9446700	7645600
Adapter-related protein complex 2 beta subunit;Adaptor protein complex AP-2 subunit beta;AP105B;AP-2 complex subunit beta;Beta-2-adaptin;Beta-adaptin;Clathrin assembly protein complex 2 beta large chain;Plasma membrane adaptor HA2/AP2 adaptin beta subunit;cDNA FLJ78733, highly similar to Homo sapiens adaptor-related protein complex 2, beta 1 subunit (AP2B1), transcript variant 1, mRNA;cDNA FLJ784…	IPI00784366;IPI00784156;IPI00790702;IPI00909735	IPI00784366;IPI00784156;IPI00790702	ADTB2;AP2B1;CLAPB1;DKFZp781K0743;hCG_1992160	P63010-2;P63010;A8K0G3;A8K916;B4DWG4;B4E261;Q68DI0;Q96EL6;P63010-1;Q7Z451	0.622331		-0.146216	0.0560286	-0.649937	0.155261	0.903617	0.256318	1.0396	0.637308	1.11362	17	16	5	105.69	951	20.8	18.3	4	101.3	99.472	40.578	111.88	105.44	50.231	65.925	81.71	32.433	235.54	223.49	16.033	48643000	31532000	39536000	19042000	51434000	33841000	10899000	45385000	12555000
Adapter-related protein complex 2 mu subunit;Adaptin-mu2;Adaptor protein complex AP-2 subunit mu;AP-2 complex subunit mu;AP-2 mu chain;Clathrin assembly protein complex 2 medium chain;Clathrin coat assembly protein AP50;Clathrin coat-associated protein AP50;HA2 50 kDa subunit;Plasma membrane adaptor AP-2 50 kDa protein;cDNA FLJ53034, highly similar to AP-2 complex subunit mu-1;cDNA FLJ50668, high…	IPI00022256;IPI00909772;IPI00619900;IPI00937793;IPI00798379;IPI00925072;IPI00790642;IPI00924869;IPI00925403;IPI00925212;IPI00925682;IPI00925750	IPI00022256;IPI00909772;IPI00619900;IPI00937793;IPI00798379;IPI00925072;IPI00790642	AP2M1;CLAPM1;KIAA0109	Q96CW1-1;Q96CW1;B4DFM1;B4DTI4;B4DNB9;Q96CW1-2;B4E304;B4DJB1;C9JJ47;B7Z4N2;C9JE34	0.238827		-0.414311	-0.14543	-0.913033	-0.184471	0.750378	0.208757	0.90411	0.531067	0.879972	16	14	4	49.654	435	36.1	28.7	8.5	102.81	101.47	45.364	100.06	122.26	33.668	109.35	103.74	27.642	100.62	68.961	29.755	33555000	26634000	42612000	29919000	63329000	48983000	2274800	2462700	13202000
Adapter-related protein complex 3 sigma-1 subunit;AP-3 complex subunit sigma-1;AP-3 complex subunit sigma-3A;Clathrin-associated/assembly/adapter protein, small 3;Sigma-3A-adaptin;Sigma-adaptin 3a;cDNA, FLJ92106, highly similar to Homo sapiens adaptor-related protein complex 3, sigma 1 subunit(AP3S1), mRNA	IPI00014624;IPI00872560	IPI00014624	AP3S1;CLAPS3	Q92572;B2R4I8	0.299593		0.68669		0.337357	1.03602	1.60959	0.556583		1.26344	2.05057	0	2	3	32.144	293	0	9.9	15	93.742	97.556	115.72				44.386	47.993	12.139	176.46	71.311	61.516	0	0	0	2182600	5392300	9420800	1244000	4750000	11761000
Adapter-related protein complex 3 subunit beta-1;Adaptor protein complex AP-3 subunit beta-1;AP-3 complex subunit beta-1;Beta-3A-adaptin;Clathrin assembly protein complex 3 beta-1 large chain;cDNA FLJ76822, highly similar to Homo sapiens adaptor-related protein complex 3, beta 1 subunit (AP3B1), mRNA;Adaptor-related protein complex 3 beta 1 subunit;cDNA FLJ51426, highly similar to Adapter-related…	IPI00021129;IPI00397887	IPI00021129;IPI00397887	ADTB3A;AP3B1	O00203-1;O00203;A8K586;Q3MNE1;O00203-2;B4E0B2	0.286495		-0.0423786	-0.0628512	-0.0219061		0.971053	0.0194881	0.95737	0.984931		3	1	0	121.32	1094	3.7	1	0	85.5	69.179	106.31	65.32	53.452	31.174	69.084	55.791	7.4232				2480400	2933900	4959100	406370	4732300	773910	0	0	0
Adapter-related protein complex 3 subunit delta-1;AP-3 complex subunit delta;AP-3 complex subunit delta-1;Delta-adaptin;AP3D1 protein;cDNA, FLJ79548, highly similar to AP-3 complex subunit delta-1;cDNA FLJ37141 fis, clone BRACE2023801, highly similar to AP-3 complex subunit delta-1;Delta-adaptin,;Delta adaptin	IPI00719680;IPI00411453;IPI00411677;IPI00289608;IPI00413686	IPI00719680;IPI00411453;IPI00411677;IPI00289608;IPI00413686	AP3D1;PRO0039	O14617-5;O14617;O14617-1;Q6PK82;O14617-4;O14617-2;O14617-3;B0AZV8;B3KSV6;Q9UEA9;Q9UEB0	0.423356		0.415239	-0.0603975	0.0618723	1.24424	1.33352	0.790681	0.959	1.04382	2.36894	3	5	4	136.65	1215	3.9	5.8	3.6	125.08	131.94	82.136	80.763	135.01	29.472	95.677	113.36	35.858	160.38	131.72	18.756	3062700	8546000	6090600	7624700	12829000	10034000	38284000	11206000	35505000
Adaptor protein complex AP-1 mu-2 subunit;Adaptor-related protein complex 1 mu-2 subunit;AP-1 complex subunit mu-2;AP-mu chain family member mu1B;Clathrin assembly protein complex 1 medium chain 2;Golgi adaptor HA1/AP1 adaptin mu-2 subunit;Mu1B-adaptin;Mu-adaptin 2;cDNA FLJ13801 fis, clone THYRO1000173, highly similar to AP-1 complex subunit mu-2;Adaptor-related protein complex 1, mu 2 subunit va…	IPI00002552;IPI00219794	IPI00002552;IPI00219794	AP1M2	Q9Y6Q5-1;Q9Y6Q5;Q9Y6Q5-2;B3KN68;Q53GI5	0.258052		-1.92739	-1.10033	-2.75446		0.262904	0.225014	0.46641	0.148192		7	2	1	48.108	423	20.1	5.2	2.4	154.09	118.16	195.9	115.61	167.21	81.053	10.921	38.823	21.561				4258000	7289600	10366000	3030700	4566600	2587300	0	0	0
Adaptor-associated kinase 1;AP2-associated protein kinase 1;AAK1 protein	IPI00916402;IPI00479760;IPI00916534	IPI00916402;IPI00479760;IPI00916534	AAK1;KIAA1048	Q2M2I8;B7ZLC4;Q9BUD9	0.0600585		1.42898	0.767062	2.0344	1.48548	2.69256	1.19872	1.7018	4.09651	2.8001	2	2	3	103.88	961	3.3	3.6	5	119.89	103.9	106.9	81.121	93.655	46.175	88.949	33.634	105.73	152.66	89.903	17.435	4665400	2109500	5110900	2998800	3050100	2102900	18684000	8307500	30459000
Adducin-like protein 70;Gamma-adducin;Adducin 3 isoform a variant;Adducin 3 (Gamma);Adducin 3 (Gamma), isoform CRA_a;cDNA FLJ77558, highly similar to Homo sapiens adducin 3 (gamma) (ADD3), transcript variant 1, mRNA	IPI00220754;IPI00004408	IPI00220754;IPI00004408	ADD3;ADDL;hCG_1789399;RP11-252O7.3-001	Q9UEY8-2;Q9UEY8;Q5VU09;Q9UEY8-1;Q53FL4;Q59EK1;Q5VU08	0.112409		0.960866	0.546857	1.66228	0.673463	1.94648	0.947644	1.4609	3.16516	1.5949	3	3	4	75.67	674	5.2	5.8	8.9	149.15	153.54	137.93	30.096	105.68	69.313	90.063	64.958	77.374	141.73	142.58	127.44	1132900	1145200	2332300	1208600	1558400	3469400	612230	8568500	7493700
Adenine nucleotide translocator 1;ADP,ATP carrier protein 1;ADP,ATP carrier protein, heart/skeletal muscle isoform T1;ADP/ATP translocase 1;Solute carrier family 25 member 4;cDNA FLJ75273, highly similar to Homo sapiens solute carrier family 25 (mitochondrial carrier;adenine nucleotide translocator), member 4, mRNA	IPI00022891;IPI00556601	IPI00022891	ANT1;SLC25A4	P12235;A8K787	0.0208135	+	2.13636		2.06649	2.20623	4.39651	0.30124		4.18866	4.61467	4	22	15	33.064	298	9.1	56.7	32.9	110.79	109.68	86.411				84.656	78.019	22.365	190.48	101	51.721	0	0	0	7177800	67515000	33402000	4891400	88270000	11893000
Adenine nucleotide translocator 2;ADP,ATP carrier protein 2;ADP,ATP carrier protein, fibroblast isoform;ADP/ATP translocase 2;Solute carrier family 25 member 5;cDNA, FLJ96310, highly similar to Homo sapiens solute carrier family 25 (mitochondrial carrier;adenine nucleotide translocator), member 5 (SLC25A5), mRNA;SLC25A5 protein	IPI00007188;IPI00010420	IPI00007188	ANT2;SLC25A5	P05141;B2RCV1;Q6NVC0	0.808652		0.0657344	0.462157	-0.361993	0.0970389	1.04662	0.299794	1.3776	0.778089	1.06958	8	26	24	32.895	298	19.1	57.4	51	130.67	118.32	77.576	102.03	105.58	67.062	59.635	83.41	64.654	189.01	130.96	33.235	5017300	73507000	27561000	42054000	340590000	414130000	14446000	194050000	226320000
Adenine nucleotide translocator 3;ADP,ATP carrier protein 3;ADP,ATP carrier protein, isoform T2;ADP/ATP translocase 3;Solute carrier family 25 member 6;ADP,ATP carrier protein, liver isoform T2 variant;cDNA, FLJ92654, highly similar to Homo sapiens solute carrier family 25 (mitochondrial carrier;adenine nucleotide translocator), member 6 (SLC25A6), mRNA;SLC25A6 protein;Solute carrier family 25 (M…	IPI00291467;IPI00645646;IPI00455148	IPI00291467;IPI00645646	ANT3;CDABP0051;SLC25A6;hCG_1746794	P12236;Q59EI9;Q6I9V5	0.0233987	+	0.588816	0.74528	0.593398	0.42777	1.50401	0.165577	1.6763	1.5088	1.34515	9	24	21	32.866	298	20.8	58.4	40.3	108.05	102.3	61.041	95.399	104.42	23.641	60.487	86.853	55.768	208.93	148.72	38.205	6219200	49032000	21320000	81554000	556930000	484090000	57000000	611090000	419400000
Adenosine 3-phospho 5-phosphosulfate transporter 1;PAPS transporter 1;Putative MAPK-activating protein PM15;Putative NF-kappa-B-activating protein 48;Solute carrier family 35 member B2;cDNA FLJ59462, highly similar to Adenosine 3-phospho 5-phosphosulfate transporter 1;cDNA FLJ59469, highly similar to Adenosine 3-phospho 5-phosphosulfate transporter 1;cDNA FLJ41755 fis, clone HSYRA2009102, highly …	IPI00642271;IPI00942871;IPI00384867;IPI00854750	IPI00642271;IPI00942871;IPI00384867;IPI00854750	PAPST1;PSEC0149;SLC35B2	Q8TB61-1;Q8TB61;B4DDM2;B4DDU9;B3KVY9;Q8TB61-2;Q8TB61-3	0.227703		-0.329229	-0.206179	-0.452279		0.795962	0.0961259	0.86683	0.730887		2	1	0	47.514	432	4.9	2.5	0	67.963	53.473	40.16	56.768	51.653	56.153							2042000	995720	1039800	732620	4608800	726930	0	0	0
Adenosine 5-phosphotransferase;Adenosine kinase;cDNA FLJ61435, moderately similar to Adenosine kinase (EC 2.7.1.20);cDNA FLJ57673, highly similar to Adenosine kinase (EC 2.7.1.20);Adenosine kinase, isoform CRA_a;cDNA FLJ75655, highly similar to Homo sapiens adenosine kinase (ADK), transcript variant ADK-short, mRNA	IPI00290279;IPI00234368	IPI00290279;IPI00234368	ADK;hCG_2024637;RP11-383B24.1-003	P55263-1;P55263;Q5JQ11;Q86U79;P55263-2;B7Z783;B7Z800;Q5JQ10;Q9HB33	0.222863		2.06719		1.31244	2.82194	4.1907	3.24387		2.48361	7.07114	0	3	2	40.545	362	0	8	6.1	146.54	123.16	165.9				53.045	101.59	96.646	345.8	277.12	36.521	0	0	0	532570	2392900	1436900	2637000	34883000	3242300
Adenosine aminohydrolase;Adenosine deaminase	IPI00296441	IPI00296441	ADA	P00813	0.0424888	+	1.75197	1.22608	1.55639	2.47345	3.36819	1.7088	2.3393	2.94118	5.5537	1	2	2	40.764	363	4.4	7.2	11	85.423	114.46	144.89				3.9648	8.2667	5.7215	271.03	69.52	3.9858	705860	749800	2648700	744740	1666700	3144600	1648400	1371000	884000
Adenosine diphosphoribose pyrophosphatase;ADP-ribose diphosphatase;ADP-ribose phosphohydrolase;ADP-ribose pyrophosphatase, mitochondrial;Nucleoside diphosphate-linked moiety X motif 9;Putative nudix hydrolyase;cDNA FLJ14389 fis, clone HEMBA1002876	IPI00031558;IPI00415040;REV__IPI00888187;REV__IPI00878370;REV__IPI00896506;REV__IPI00946079;REV__IPI00916109;REV__IPI00945715	IPI00031558;IPI00415040	NUDT10;NUDT9;PSEC0099;UNQ3012/PRO9771	Q9BW91-1;Q9BW91;Q8NG26;Q96KB3;Q9BW91-2	0.33337		0.638292	0.0298417	0.245095	1.63994	1.55649	1.16539	1.0209	1.18517	3.11653	6	9	6	39.125	350	21.4	29.1	21.7	110.71	107.81	43.915	47.212	40.064	17.997	45.322	40.923	30.911	266.09	124.06	27.034	4198900	6828200	12269000	4964700	24822000	24720000	3006100	4238100	7747900
Adenosylhomocysteinase;S-adenosyl-L-homocysteine hydrolase	IPI00012007	IPI00012007	AHCY;SAHH	P23526;B3KUN3	0.0953353		0.785764	0.268913	0.972563	1.11582	1.72401	0.506891	1.2049	1.96232	2.16718	25	21	19	47.716	432	43.5	38.9	40.7	136.15	129.64	103.47	121.55	115.04	28.548	85.394	102.9	40.318	159.41	142.53	43.912	71970000	197590000	107420000	103500000	293620000	312270000	71752000	539170000	213250000
Adenovirus early region 1B-associated protein 5;E1B-55 kDa-associated protein 5;Heterogeneous nuclear ribonucleoprotein U-like protein 1;cDNA FLJ75163, highly similar to Homo sapiens heterogeneous nuclear ribonucleoprotein U-like 1 (HNRPUL1), transcript variant 4, mRNA;cDNA FLJ78309, highly similar to Homo sapiens heterogeneous nuclear ribonucleoprotein U-like 1 (HNRPUL1), transcript variant 1, m…	IPI00013070;IPI00167147;IPI00736859;IPI00402391;IPI00386971;IPI00258093	IPI00013070;IPI00167147;IPI00736859;IPI00402391	E1BAP5;HNRNPUL1;HNRPUL1	Q9BUJ2-1;Q9BUJ2;A8K3W4;A8K5K0;A8K6U7;B7Z4B8;Q9BUJ2-2;Q9BUJ2-4;B3KM60;Q9BUJ2-3	0.752431		0.148276	-0.324852	-0.195852	0.965531	1.10824	0.646017	0.79838	0.873057	1.95278	15	5	9	95.737	856	21.8	8.2	13.3	139.36	128.64	53.98	163.51	93.091	69.835	142.24	117.02	37.202	149.27	125.5	72.544	47264000	33581000	34451000	24891000	63153000	68810000	4591800	22363000	9806900
Adenylate cyclase-inhibiting G alpha protein;Guanine nucleotide-binding protein G(i) subunit alpha-1;cDNA FLJ57446, highly similar to Guanine nucleotide-binding protein G(i), alpha-1 subunit;Putative uncharacterized protein GNAI1	IPI00337415;IPI00925531;IPI00925310;IPI00925068	IPI00337415;IPI00925531	GNAI1	P63096;B4E2V1;O43383;C9J3A4	0.184525		0.856203	1.11157	0.60084		1.81027	0.455519	2.1608	1.5166		9	13	4	40.361	354	25.7	31.9	5.4	92.743	98.549	66.192	130.32	142	10.071	24.379	12.253	28.111				458360	2594700	6611700	2536500	23531000	16722000	0	0	0
Adenylate cyclase-inhibiting G alpha protein;Guanine nucleotide-binding protein G(i) subunit alpha-2;GTP-binding regulatory protein Gi alpha-2 chain;GNAI2 protein;Guanine nucleotide binding protein (G protein), alpha inhibiting activity polypeptide 2;Galphai2 protein;cDNA FLJ38980 fis, clone NT2RI2004884, highly similar to Guanine nucleotide-binding protein G(i), alpha-2 subunit;cDNA FLJ39276 fis…	IPI00748145;IPI00926935;IPI00925504;IPI00217906;IPI00925691;IPI00924427;IPI00794986;IPI00796250;IPI00924659	IPI00748145;IPI00926935;IPI00925504;IPI00217906;IPI00925691;IPI00924427;IPI00794986	GNAI2;GNAI2B;WUGSC:H_LUCA16.1;hCG_1997820;WUGSC:H_LUCA15.1	P04899-1;P04899;Q93020;Q96C71;Q6B6N3;B3KTZ0;P04899-2;B3KX51;B4DYA0;B3KP24;B4E2X5;Q6LCB5	0.576129		0.181903	0.251325	-0.325041	0.619426	1.13438	0.369233	1.1903	0.798276	1.53626	18	23	12	40.45	355	51	56.3	28.7	124.16	131.03	39.713	100.07	98.374	37.336	86.565	111.31	44.344	193.34	144.87	38.94	26117000	219600000	69998000	39026000	240060000	197280000	17927000	91722000	126800000
Adenylate kinase 1 variant;Adenylate kinase 1;Adenylate kinase isoenzyme 1;ATP-AMP transphosphorylase 1;Myokinase;Adenylate kinase 1, isoform CRA_b;AK1 protein;cDNA, FLJ94359, Homo sapiens adenylate kinase 1 (AK1), mRNA	IPI00640817;IPI00018342;IPI00515036;IPI00743623;IPI00844054;IPI00943762	IPI00640817;IPI00018342;IPI00515036	AK1;RP11-203J24.1-009;hCG_2039407;RP11-203J24.1-008;RP11-203J24.1-011	Q53EY8;Q5T9B7;P00568;Q6FGX9;Q5T9B8	0.0751768		3.04339		2.68233	3.40446	8.24427	2.94852		6.4189	10.5887	0	10	12	23.411	210	0	41.4	52.4	132.05	126.65	86.906				66.227	73.289	68.859	223.18	194.33	100.53	0	0	0	27524000	31560000	64970000	5087700	12600000	5411200
Adenylate kinase 2, mitochondrial;ATP-AMP transphosphorylase 2;cDNA FLJ55097, highly similar to Adenylate kinase isoenzyme 2, mitochondrial (EC 2.7.4.3)	IPI00215901;IPI00921960;IPI00172460;IPI00218989	IPI00215901;IPI00921960;IPI00172460;IPI00218989	ADK2;AK2	P54819-1;P54819;P54819-6;P54819-3;B4DLK2;P54819-4	0.784926		0.111341	0.735435	-0.50284	0.101428	1.08023	0.483968	1.6649	0.705716	1.07283	1	14	14	26.477	239	6.7	60.3	73.6	104.94	108.54	31.06				42.938	51.809	20.313	171.11	174.99	39.371	47099	276170	383150	53033000	281150000	97105000	43200000	239040000	253430000
Adenylate kinase 3;Adenylate kinase 3 alpha-like 1;GTP:AMP phosphotransferase mitochondrial;cDNA FLJ42834 fis, clone BRCAN2019002, highly similar to GTP:AMP phosphotransferase mitochondrial (EC 2.7.4.10);GTP:AMP phosphotransferase;GTP:ATP phosphotransferase;Adenylate kinase 3, isoform CRA_b;cDNA FLJ40886 fis, clone UTERU2000663, highly similar to GTP:AMP phosphotransferase mitochondrial (EC 2.7.4…	IPI00465256;IPI00478236;IPI00910240	IPI00465256;IPI00478236;IPI00910240	AK3;AK3L1;AK6;AKL3L;hCG_2011468;RP11-6J24.4-001	Q9UIJ7;B3KWD9;Q7Z4Y4;Q7Z531;Q9HC01;B4DP58	0.549325		0.284055		-0.0478175	0.615928	1.21761	0.399618		0.967399	1.53254	0	6	8	25.565	227	0	28.2	35.7	119.78	121.22	37.604				81.181	96.81	16.854	230.42	172.72	51.105	0	0	0	38970000	100300000	40212000	10538000	41292000	28918000
Adenylate kinase 3-like;Adenylate kinase isoenzyme 4, mitochondrial;ATP-AMP transphosphorylase	IPI00016568	IPI00016568	AK3;AK3L1;AK3L2;AK4	P27144;B2R927	0.0918751		-1.86126		-1.59077	-2.13175	0.275235	0.0734076		0.331994	0.22818	0	5	2	25.268	223	0	21.5	12.6	140.71	90.457	148.72				122.08	110.46	11.028	5.9438	155.72	0.75583	0	0	0	4918200	18234000	30146000	939990	5563200	1375700
Adenylosuccinase;Adenylosuccinate lyase;cDNA FLJ53891, highly similar to Adenylosuccinate lyase (EC 4.3.2.2);cDNA FLJ59367, highly similar to Adenylosuccinate lyase (EC 4.3.2.2);cDNA FLJ75223, highly similar to Homo sapiens adenylosuccinate lyase (ADSL);Trinucleotide repeat containing 6B	IPI00942092;IPI00026904;IPI00220887;IPI00915872;IPI00909590;IPI00916724	IPI00942092;IPI00026904;IPI00220887;IPI00915872	ADSL;AMPS;RP5-1042K10.8-004;RP5-1042K10.7-008;TNRC6B	P30566-1;P30566;B4DUM2;Q71UA4;B0QY75;B4DP46;P30566-2;A8K4X6;B7ZB91	0.44819		0.269058	0.287236	-0.237808	0.757745	1.20502	0.422361	1.2203	0.848033	1.69085	10	6	5	54.889	484	22.3	16.3	13.4	111.15	111.06	47.862	156.04	139.1	36.06	78.006	93.985	10.725	158.46	147.45	43.435	10465000	83003000	37526000	13098000	84021000	58002000	8373400	12002000	54462000
Adenylosuccinate synthetase isozyme 2;Adenylosuccinate synthetase, acidic isozyme;IMP--aspartate ligase 2;Adenylosuccinate synthetase	IPI00026833;IPI00641992	IPI00026833	ADSS;ADSS2	P30520;B1AQM5;B4E1L0	0.158665		-0.658694	-0.515067	-1.23364	-0.227371	0.633452	0.217257	0.69976	0.425242	0.85419	10	8	3	50.097	456	25	22.4	9.9	114.3	109.88	50.101	116.36	137.58	51.123	65.404	80.489	28.534	143.71	104.25	17.975	18609000	27717000	25103000	32204000	67653000	146840000	5605100	44436000	27384000
Adenylyl cyclase-associated protein	IPI00939159	IPI00939159		B4DNA3;B4DUZ8	0.399273		0.46227	0.85016	-0.406101	0.942751	1.37771	0.642364	1.8027	0.75466	1.92219	18	15	10	47.12	433	54	54.3	33.5	59.788	68.976	68.377	10.252	20.932	19.818	55.686	69.587	39.754	68.427	54.797	2.1556	12471000	46467000	40792000	15394000	64452000	43152000	1710300	7042800	9173700
Adenylyl cyclase-associated protein 1	IPI00639931;IPI00645789	IPI00639931	CAP;CAP1	Q01518-2;Q01518	0.751141		0.127446	0.436695	-0.181802		1.09236	0.333683	1.3535	0.881601		18	16	8	51.784	474	43	46	19.6	47.424	57.733	66.598	16.485	13.323	3.2382							902740	908010	2038100	88752	739090	1056800	0	0	0
Adenylyl cyclase-associated protein 1;Adenylyl cyclase-associated protein	IPI00008274;IPI00646869;IPI00644589;IPI00641881;IPI00647351;IPI00644109;IPI00646269;IPI00642414;IPI00514858;IPI00954082	IPI00008274	CAP;CAP1	Q01518-1;Q01518;B2RDY9;B4DI38;B4DNW7;B4DNY3	0.350735		0.386792	0.540722	-0.228849	0.848505	1.30748	0.479365	1.4547	0.853315	1.80063	19	16	9	51.855	475	44.8	46.1	24.4	122.84	121.65	67.051	136.92	117.66	26.544	63.253	95.892	30.519	155.64	149.97	13.293	27452000	64583000	70369000	28874000	161000000	76040000	9722300	99083000	36951000
Adenylyl cyclase-associated protein 2;Adenylyl cyclase-associated protein	IPI00027342;IPI00922569;IPI00945887;IPI00552929;IPI00922216;IPI00945601;IPI00922040;IPI00946116	IPI00027342;IPI00922569;IPI00945887;IPI00552929;IPI00922216	CAP2;RP11-14H3.2-001;DKFZp686D0714	P40123;B2R5Y3;Q9BYW9;B7Z4M3;B7Z1C4;Q5JPJ8;B7Z385	0.00896426	+	4.30383	5.11711	3.99123	3.80315	19.7507	11.4583	34.706	15.9031	13.9593	1	8	10	52.823	477	2.5	14.3	26.6	169.2	156.45	259.36				106.64	136.99	52.76	132.55	101.15	128.45	4506100	1594100	674500	10141000	10925000	6300400	10192000	30245000	17348000
Adipocyte enhancer-binding protein 1;Aortic carboxypeptidase-like protein;cDNA FLJ33612 fis, clone BRAMY2016953, highly similar to Homo sapiens AE binding protein 1 (AEBP1), mRNA;cDNA FLJ55979, highly similar to Homo sapiens AE binding protein 1 (AEBP1), mRNA	IPI00745313;IPI00894097;IPI00296558;IPI00910836;IPI00925100;IPI00927385;IPI00926015;IPI00924915	IPI00745313;IPI00894097	ACLP;AEBP1	Q8IUX7-1;Q8IUX7;Q8IUX7-2;B3KR36;B4DJB3	0.248421		-0.859753	-0.506128	-1.21338		0.551047	0.192936	0.70411	0.431258		3	1	0	130.93	1158	2.8	1.4	0	93.004	80.515	55.147	25.396	54.832	20.794							339680	587230	487500	294480	1135200	246320	0	0	0
Adipocyte plasma membrane-associated protein;Protein BSCv;Chromosome 20 open reading frame 3	IPI00031131;IPI00791304;IPI00929530	IPI00031131;IPI00791304;IPI00929530	APMAP;C20orf3;UNQ1869/PRO4305;RP4-568C11.2-002	Q9HDC9-1;Q9HDC9;A2A2F9;Q9HDC9-2	0.381918		0.53501	1.42755	-0.222805	0.400282	1.44895	0.953188	2.6899	0.856898	1.31977	11	8	2	46.48	416	36.8	25.5	5.5	139	133.04	61.322	246.89	180.47	81.527	97.54	105.97	23.234	150.61	224.39	74.201	18164000	57825000	55139000	29128000	78061000	54889000	5767800	34711000	17437000
Adipocyte-derived leucine aminopeptidase;Aminopeptidase PILS;ARTS-1;Endoplasmic reticulum aminopeptidase 1;Puromycin-insensitive leucyl-specific aminopeptidase;Type 1 tumor necrosis factor receptor shedding aminopeptidase regulator;Adipocyte-derived leucine aminopeptidase variant;cDNA FLJ76662, highly similar to Homo sapiens type 1 tumor necrosis factor receptor shedding aminopeptidase regulator,…	IPI00477831;IPI00165949	IPI00477831;IPI00165949	APPILS;ARTS1;ERAP1;KIAA0525;UNQ584/PRO1154	Q9NZ08-1;Q9NZ08;Q53GQ8;Q9NZ08-2;A8K6H1	0.312129		0.70164	1.07615	0.327131		1.62635	0.603787	2.1084	1.25452		4	3	0	107.23	941	4.7	3.8	0	80.079	71.727	49.724	107.77	62.932	54.62	42.87	80.529	26.383				1738300	2425600	4803200	4269700	6693500	13204000	0	0	0
Adipophilin;Adipose differentiation-related protein;Perilipin-2;cDNA FLJ57380, highly similar to Adipophilin;ADFP protein;Adipose differentiation-related protein, isoform CRA_b;cDNA, FLJ93444, highly similar to Homo sapiens adipose differentiation-related protein (ADFP), mRNA;cDNA FLJ59123, moderately similar to Adipophilin	IPI00293307;IPI00643517;IPI00514709;IPI00646360;IPI00171391;IPI00921838;IPI00172476;IPI00166638	IPI00293307;IPI00643517	ADFP;PLIN2;hCG_28271;RP11-151J10.1-007;RP11-151J10.1-005	Q99541;B4DJK9;Q6FHZ7;B4DNH6;Q5SYF5	0.0446224	+	0.440581	0.436268	0.275944	0.60953	1.35715	0.157732	1.3531	1.21079	1.52576	29	21	17	48.075	437	81.2	68.4	49.4	129.02	130.01	69.031	114.54	95.946	35.079	90.493	113.84	35.428	187.48	154.11	36.186	60431000	236750000	257050000	269660000	940130000	630050000	95656000	401290000	274600000
ADP-dependent glucokinase;RbBP-35;cDNA FLJ55953, highly similar to ADP-dependent glucokinase (EC 2.7.1.147);cDNA FLJ56905, highly similar to ADP-dependent glucokinase (EC 2.7.1.147)	IPI00556385;IPI00329593;IPI00940629;IPI00550060;IPI00555848;IPI00103892;IPI00953501;IPI00903303	IPI00556385;IPI00329593;IPI00940629	ADPGK;PSEC0260	Q9BRR6-1;Q9BRR6;B4DDP8;B4DG35;Q9BRR6-2	0.0634073		-0.750121	-0.976191	-0.354565	-0.919607	0.594554	0.15254	0.50832	0.782105	0.528653	3	3	2	54.088	497	11.5	10.3	7	105.34	100.38	47.555	209.44	294.74	87.52	59.793	25.62	19.092	26.265	36.601	28.777	158940	586140	335340	1078800	4946800	5973900	515270	3842400	4705000
ADP-ribosylation factor 1 GTPase-activating protein;ADP-ribosylation factor GTPase-activating protein 1;ARF1-directed GTPase-activating protein;cDNA FLJ54522, highly similar to ADP-ribosylation factor GTPase-activating protein 1;ADP-ribosylation factor GTPase activating protein 1 isoform a variant;ADP-ribosylation factor GTPase activating protein 1;ADP-ribosylation factor GTPase activating protei…	IPI00217354;IPI00175169;IPI00449160;IPI00922590	IPI00217354;IPI00175169;IPI00449160;IPI00922590	ARF1GAP;ARFGAP1;hCG_23411;RP11-261N11.1-004	Q8N6T3-2;Q8N6T3;B7Z3U0;Q8N6T3-1;Q53F62;Q8N6T3-3;B7ZBI2;B7Z8H8	0.358403		-0.291001	-0.242755	-0.739157	0.108907	0.817335	0.239689	0.84513	0.599089	1.07841	3	1	1	45.675	414	10.4	3.6	4.6	71.251	97.169	71.109	82.462	122.29	114.2	93.377	6.5502	105.67				5113000	3062800	7777200	2719000	4402300	1062100	443950	333790	1182200
ADP-ribosylation factor GTPase-activating protein 3;ADP-ribosylation factor GTPase activating protein 3;cDNA FLJ55728, highly similar to ADP-ribosylation factor GTPase-activating protein 3	IPI00299263;IPI00915304;IPI00879742;IPI00922812;IPI00877805	IPI00299263;IPI00915304;IPI00879742	ARFGAP1;ARFGAP3;AL049757.1-003	Q9NP61;B0QYV8;B7Z4Q0	0.630728		0.835451	-0.439578		2.11048	1.78441	2.53215	0.73735		4.31835	1	0	2	56.928	516	2.7	0	5.2	227.81	208.54	87.031	213.98	88.939	110.73				53.337	107.19	27.3	8430300	1595500	4537700	0	0	0	523630	472350	626240
ADP-ribosylation factor-interacting protein 1;Arfaptin-1;ADP-ribosylation factor interacting protein 1 (Arfaptin 1), isoform CRA_b;ARFIP1 protein;cDNA FLJ53696, highly similar to Arfaptin-1;cDNA, FLJ79024, highly similar to Arfaptin-1;ADP-ribosylation factor interacting protein 1;ADP-ribosylation factor interacting protein 1 (Arfaptin 1), isoform CRA_a;cDNA FLJ75640, highly similar to Homo sapien…	IPI00021258;IPI00216520;IPI00744919;IPI00910325	IPI00021258;IPI00216520;IPI00744919;IPI00910325	ARFIP1;hCG_26981	P53367-1;P53367;B4E273;B7ZA10;P53367-2;Q2M2X4;Q8N8M9;B4DS69	0.220626		-0.424215	-0.0972858	-0.89476	-0.2806	0.745244	0.204725	0.93479	0.537837	0.823249	6	1	2	41.738	373	22.5	4	8.3	105.34	106.34	67.356	97.107	122.04	51.362	74.396	7.8668	99.404	145.92	114.76	34.798	5147800	8997200	10128000	4185000	8315200	2573100	1749900	13441000	7237900
ADP-ribosylation factor-like protein 3	IPI00003327	IPI00003327	ARFL3;ARL3	P36405	0.401318		2.98907	8.51104	1.28659	-0.830418	7.93962	209.764	364.82	2.4395	0.562366	1	3	1	20.455	182	9.3	18.7	10.4	147.27	144.29	177.4				114.66	104.38	5.5111				903350	349900	1477000	11588000	6783700	37153000	165240	368950	2101600
ADP-ribosylation factor-like protein 6-interacting protein 2;Atlastin-2;cDNA FLJ51152, highly similar to Homo sapiens ADP-ribosylation factor-like 6 interacting protein 2 (ARL6IP2), mRNA;cDNA FLJ51186, highly similar to Homo sapiens ADP-ribosylation factor-like 6 interacting protein 2 (ARL6IP2), mRNA;cDNA FLJ53876, highly similar to Homo sapiens ADP-ribosylation factor-like 6 interacting protein …	IPI00169267;IPI00893779;IPI00007183;IPI00845387;IPI00917944;IPI00917688	IPI00169267;IPI00893779;IPI00007183;IPI00845387	ARL6IP2;ATL2	Q8NHH9-1;Q8NHH9;B7Z7X8;B7Z8V5;Q8NHH9-2;B7Z1X2;B7Z2H0;Q8NHH9-3;B7ZA64	0.315866		-1.40664	-0.645187	-2.1681		0.377189	0.294797	0.63941	0.222504		5	2	0	66.228	583	9.8	5.5	0	136.94	110.94	84.069	160.86	73.801	82.174	64.499	70.986	17.2				4807800	6921400	7524200	842550	2587100	1903000	0	0	0
ADP-ribosylation factor-like protein 6-interacting protein 5;Cytoskeleton-related vitamin A-responsive protein;Dermal papilla-derived protein 11;Glutamate transporter EAAC1-interacting protein;GTRAP3-18;JM5;PRA1 family protein 3;Prenylated Rab acceptor protein 2;Protein JWa;Putative MAPK-activating protein PM27;cDNA FLJ90131 fis, clone HEMBB1000447, highly similar to PRA1 family protein 3;cDNA FL…	IPI00007426;IPI00908696;IPI00909717;IPI00945943;IPI00946721;IPI00946450	IPI00007426;IPI00908696;IPI00909717;IPI00945943;IPI00946721;IPI00946450	ARL6IP5;DERP11;HSPC127;JWA;PRA2;PRAF3	O75915;B2R6V5;B3KQB4;B4DZZ0;B4DWQ6;C9JVC5;C9JQU6;C9JZ39	0.00205467	+	1.69146	1.83782	1.57798	1.65858	3.22984	0.303035	3.5747	2.98552	3.15706	1	2	1	21.614	188	10.1	20.7	13.8	95.771	97.002	94.718				29.435	72.543	14.438	75.329	102.53	27.549	1162600	721740	3818500	3473500	3822100	12685000	28067000	9689500	9590900
ADP-sugar pyrophosphatase;Nucleoside diphosphate-linked moiety X motif 5;YSA1H;Putative uncharacterized protein NUDT5	IPI00296913;IPI00646762;IPI00646261;IPI00647797;IPI00644292;IPI00641064	IPI00296913;IPI00646762;IPI00646261;IPI00647797;IPI00644292	HSPC115;NUDT5	Q9UKK9;A6NFX8;A6NHE8;A6NJU6;A6NCQ0	0.292969		0.912401	0.607484	-0.0211954	2.15091	1.88218	1.85935	1.5236	0.985416	4.44109	4	3	4	24.327	219	17.8	21	13.7	115.88	126.09	123.95	129.69	40.601	33.397	9.8279	35.737	15.379	170.47	144.12	34.235	950770	853650	1738200	3866800	13651000	18702000	3657600	30208000	15071000
Adracalin;Aladin;Achalasia, adrenocortical insufficiency, alacrimia (Allgrove, triple-A) variant;cDNA FLJ56797, highly similar to Aladin;Achalasia variant	IPI00024143;IPI00747361;IPI00792670;IPI00793524;IPI00794723;IPI00791584	IPI00024143;IPI00747361	AAAS;ADRACALA;GL003	Q9NRG9;Q53HS1;B4DDU7;Q5JB47	0.064725		-1.98937	-1.1246	-1.88397	-2.95953	0.251849	0.165554	0.45863	0.270937	0.128556	5	6	1	59.573	546	11.7	15.8	2.2	113.51	120.59	132.99	87.452	68.355	66.164	88.067	87.271	139.39				5257300	11340000	6827000	13063000	37806000	19201000	1352300	2182000	1359000
Afadin;ALL1-fused gene from chromosome 6 protein;Myeloid/lymphoid or mixed-lineage leukemia (Trithorax homolog, Drosophila);translocated to, 4;Putative uncharacterized protein MLLT4;Afadin variant;MLLT4 protein	IPI00759546;IPI00023461;IPI00953593;IPI00216505;IPI00398718;IPI00479469;IPI00640210;IPI00552765	IPI00759546;IPI00023461;IPI00953593;IPI00216505;IPI00398718;IPI00479469;IPI00640210;IPI00552765	AF6;MLLT4;RP3-470B24.4-003;RP3-470B24.4-002;RP3-470B24.4-005	P55196-5;P55196;Q5JPV5;P55196-4;A8MQ02;C9JX92;P55196-3;P55196-1;C9IYT9;Q5TIG5;Q59FP0;Q96C95;P55196-2;Q5TIG7	0.645762		0.323626	0.117695	-0.604451	1.45763	1.25147	1.10353	1.085	0.657722	2.74657	19	3	8	207.79	1834	13.2	1.6	5.6	112.93	117.3	73.261	76.304	94.581	34.421	53.361	58.094	5.8167	101.17	75.425	22.053	7785900	9859800	10683000	2603200	5335900	1444200	56375000	24915000	87444000
AFB1 aldehyde reductase 1;Aflatoxin B1 aldehyde reductase member 2;Aldoketoreductase 7;Succinic semialdehyde reductase;Putative uncharacterized protein AKR7A2	IPI00305978;IPI00946527;IPI00940335;IPI00169280;IPI00942126;IPI00946488;IPI00922851;IPI00293721	IPI00305978;IPI00946527;IPI00940335	AFAR;AFAR1;AKR7;AKR7A2	O43488;C9JSL3	0.0209264	+	2.03215	1.64736	1.82884	2.62025	4.09014	1.63359	3.1326	3.55252	6.14855	3	4	5	39.589	359	10	12.3	15	117.3	124.13	142.02	36.856	44.779	15.366	82.919	108.16	45.859	162.58	105.01	33.207	2306500	2673300	8899300	1245900	6112300	4204200	5436100	6948600	6515000
AFG3-like protein 2;Paraplegin-like protein;Similar to AFG3 ATPase family gene 3-like 2 (Yeast)	IPI00001091	IPI00001091	AFG3L2	Q9Y4W6;Q8TA92	0.0450307	+	-0.931374	-0.734827	-1.34051	-0.718789	0.524359	0.120924	0.60089	0.394882	0.607607	27	23	8	88.583	797	30.5	27.6	11.2	138.74	123.62	102.72	118.49	103.08	51.378	122.59	149.21	89.922	185.53	113.32	59.856	55228000	54832000	55632000	122720000	149450000	80824000	1665600	3695300	4246900
Aging-associated gene 4 protein;ApoJalpha;ApoJbeta;Apolipoprotein J;Clusterin;Clusterin alpha chain;Clusterin beta chain;Complement cytolysis inhibitor;Complement cytolysis inhibitor a chain;Complement cytolysis inhibitor b chain;Complement-associated protein SP-40,40;Ku70-binding protein 1;NA1/NA2;Testosterone-repressed prostate message 2;cDNA FLJ36080 fis, clone TESTI2019872, highly similar to …	IPI00400826;IPI00291262;IPI00795633;IPI00793848	IPI00400826;IPI00291262;IPI00795633;IPI00793848	AAG4;APOJ;CLI;CLU;KUB1	P10909-2;P10909;P10909-1;B3KSE6;B4DW11;Q6LDQ3;Q8IWL5;Q8IWM0	0.289724		1.43105	0.407842	3.43662	0.448686	2.69643	5.47429	1.3267	10.8274	1.3648	1	10	2	57.832	501	3.2	22.8	3.8	120.92	137.15	136.64				119.47	108.22	48.983				137360	387940	209550	26704000	51491000	36960000	24564	117100	111430
Aging-associated gene 5 protein;Alkyldihydroxyacetonephosphate synthase, peroxisomal;Alkylglycerone-phosphate synthase;cDNA FLJ51873, highly similar to Alkyldihydroxyacetonephosphate synthase, peroxisomal (EC 2.5.1.26);cDNA, FLJ79139, highly similar to Alkyldihydroxyacetonephosphate synthase, peroxisomal (EC 2.5.1.26);Putative uncharacterized protein AGPS	IPI00010349;IPI00917312	IPI00010349	AAG5;AGPS	O00116;B7Z3Q4;B7ZAC5;Q53S12;Q53SG6;Q53SN7	0.0738549		-0.77936	-0.345693	-0.895923	-1.09646	0.582625	0.167859	0.78693	0.537403	0.467661	12	12	5	72.911	658	24.5	24.6	9.3	101.04	100.85	52.543	105.47	74.71	37.002	79.706	94.561	95.404	219.6	123.35	41.808	30535000	31859000	37354000	16261000	110760000	52450000	3598400	30238000	27046000
Agrin;AGRN protein	IPI00374563;IPI00514026;IPI00953954	IPI00374563	AGRIN;AGRN	O00468;Q15952;Q5XG79	0.285209		0.993076	-0.219673	1.04002	2.15888	1.99042	1.83708	0.85876	2.05626	4.46568	18	15	1	214.84	2045	14	11.7	0.6	106.11	113.03	47.467	106.94	97.714	42.529	69.485	75.084	31.35				1882300	6039000	7013100	4336200	32638000	34523000	577420	650380	1322500
AH antigen;Centromere protein F;Kinetochore protein CENPF;Mitosin	IPI00855998;IPI00384044;REV__IPI00478297;REV__IPI00550953;REV__IPI00642492;IPI00869107	IPI00855998	CENPF	P49454	0.162951		-1.71293	-1.26465	-2.16121		0.30504	0.136211	0.4162	0.223569		10	5	0	367.76	3210	4.2	2.1	0	83.15	88.645	98.497	60.122	67.295	68.339	55.891	75.408	43.777				3480800	4426100	3500100	1534500	5247100	1890000	0	0	0
AH receptor-interacting protein;Aryl-hydrocarbon receptor-interacting protein;HBV X-associated protein 2;Immunophilin homolog ARA9;Aryl-hydrocarbon receptor interacting protein;Mutant aryl hydrocarbon receptor-interacting protein;Aryl hydrocarbon receptor interacting protein;Truncated AIP;Truncated aryl hydrocarbon receptor interacting protein;Non-functional aryl hydrocarbon receptor interacting …	IPI00953925;IPI00925804;IPI00939349	IPI00953925;IPI00925804	AIP;XAP2	O00170;A3RDR6;A3RDR8;A7KS93;A7KS94;A7YDK1;A7YDK2;A7YDK6;A7YDK7;A8BQF1;B3TMT2;B7SBB1;C0JXB8;C0JXB9;C8CHN4;C8CK04;C8CK05;D0EKE4;D0EKE5;D0EKE6;D0EKE7;A5JGZ4	0.590584		0.431616	-0.60165	0.182148	1.71435	1.34874	1.39719	0.659	1.13457	3.28149	4	1	2	38.489	337	14.2	4.2	6.8	171.74	165.26	135.11	280.84	137.94	86.211	0.42434	3.0612	4.2741	35.573	159.51	39.153	317920	1892000	3970200	645640	15021000	14144000	187190	1587300	1387200
AIR carboxylase;Multifunctional protein ADE2;Phosphoribosylaminoimidazole carboxylase;Phosphoribosylaminoimidazole-succinocarboxamide synthase;SAICAR synthetase	IPI00217223;REV__IPI00009982;REV__IPI00410251;REV__IPI00642210	IPI00217223	ADE2;AIRC;PAICS;PAIS	P22234;B4DGX3	0.0244849	+	-0.234215	-0.159557	-0.27011	-0.272979	0.850147	0.0386147	0.8953	0.829256	0.827609	21	18	9	49.679	451	41.9	35.5	23.1	113.37	111.31	39.406	106.16	98.174	21.539	104.16	118.17	29.829	132.79	141.16	27.484	54421000	733130000	153840000	89570000	403420000	690720000	54477000	245960000	218790000
AKAP-KL;A-kinase anchor protein 2;Protein kinase A-anchoring protein 2;A kinase (PRKA) anchor protein 2;cDNA FLJ55665, highly similar to A-kinase anchor protein 2;Putative uncharacterized protein AKAP2	IPI00032064;IPI00816415;IPI00942356;IPI00914995;IPI00171217;IPI00946775;IPI00073769;IPI00643947;IPI00384832;IPI00945205;IPI00940879;IPI00945031	IPI00032064;IPI00816415;IPI00942356;IPI00914995;IPI00171217;IPI00946775	AKAP2;KIAA0920;PRKA2;RP11-470J20.3-007	Q9Y2D5-4;Q9Y2D5;Q9Y2D5-6;Q9Y2D5-7;B1ALY1;Q9Y2D5-5;B4E2K2;Q9Y2D5-3;C9JVY5	0.0549171		1.46195	0.964953	1.26531	2.1556	2.75481	1.33426	1.952	2.40379	4.45553	1	1	5	122.07	1103	1.1	0.7	7.6	107.88	114.37	89.507							65.261	87.972	73.456	122470	231960	473160	42324	68304	105100	37322000	17629000	20052000
A-kinase anchor protein 1, mitochondrial;A-kinase anchor protein 149 kDa;Dual specificity A-kinase-anchoring protein 1;Protein kinase A-anchoring protein 1;Spermatid A-kinase anchor protein 84;cDNA FLJ56047, highly similar to A kinase anchor protein 1, mitochondrial	IPI00942186;IPI00022585;IPI00158627;IPI00382444	IPI00942186;IPI00022585;IPI00158627	AKAP1;AKAP149;PRKA1	Q92667-1;Q92667;B4DN86;Q92667-2	0.767213		0.500872	-0.807301	1.80904		1.41507	2.0737	0.57145	3.5041		9	2	0	97.34	903	15.9	2.4	0	127.61	122.77	178.04	111.49	173.52	142.01							2521800	5349200	3441400	426900	2332300	851910	0	0	0
A-kinase anchor protein 12;A-kinase anchor protein 250 kDa;Gravin;Myasthenia gravis autoantigen;AKAP12 protein;Putative uncharacterized protein AKAP12;Putative uncharacterized protein DKFZp686M0430	IPI00237884;IPI00217683;IPI00867627;IPI00940222;IPI00431688	IPI00237884;IPI00217683;IPI00867627;IPI00940222	AKAP12;AKAP250;DKFZp686M0430	Q02952-1;Q02952;Q86TJ9;A6NEC7;Q02952-2;Q02952-3;Q5CZB5	0.898161		0.0964477	-0.0479794	-0.978415	1.31574	1.06914	1.03724	0.96729	0.507537	2.4893	14	8	8	191.48	1782	11.4	5.8	9.3	148.76	149.21	131.7	86.473	93.829	39.738	89.109	79.205	43.833	118.77	75.409	60.649	4884400	10771000	9235200	5001200	21721000	6026800	39355000	35099000	131400000
A-kinase anchor protein 8;A-kinase anchor protein 95 kDa;cDNA FLJ50339, highly similar to A-kinase anchor protein 8;AKAP8 protein;Putative uncharacterized protein DKFZp586B1222	IPI00014474	IPI00014474	AKAP8;AKAP95;DKFZp586B1222	O43823;B7Z8L8;Q8NE02;Q9UG73	0.707503		-0.263148	-0.795008		0.268712	0.833268	0.44434	0.57634		1.20473	2	0	2	76.107	692	3.8	0	4.2	109.38	81.631	44.376	116.76	53.523	14.966				235.99	197.27	8.194	117330	1361700	310210	0	0	0	211580	391810	607210
A-kinase anchor protein 8-like;Helicase A-binding protein 95;Homologous to AKAP95 protein;Neighbor of A-kinase-anchoring protein 95	IPI00297455;IPI00939756;IPI00641614;IPI00644440;IPI00645037;IPI00646239	IPI00297455;IPI00939756	AKAP8L;HRIHFB2018;NAKAP;NAKAP95	Q9ULX6;B5BU90	0.755686		-0.259948	-0.549346	-1.35377	1.12328	0.835118	0.958685	0.68333	0.391267	2.17841	4	1	2	71.639	646	7.4	1.4	4.3	154.64	148.87	64.655	191.75	161.34	56.389							1412300	1858000	2135300	189280	619730	273740	49510	584510	914000
Alanine aminotransferase 2;Glutamate pyruvate transaminase 2;Glutamic--alanine transaminase 2;Glutamic--pyruvic transaminase 2;cDNA FLJ33638 fis, clone BRAMY2023327, highly similar to Alanine aminotransferase 2 (EC 2.6.1.2)	IPI00152432;IPI00784445;IPI00217458	IPI00152432;IPI00784445	AAT2;ALT2;GPT2	Q8TD30-1;Q8TD30;Q8TD30-2;B3KR40	0.117573		-2.20176	-0.718569	-2.29766	-3.58904	0.217373	0.274816	0.6077	0.203393	0.0830979	14	9	1	57.903	523	34.6	21	2.1	154.95	170.51	157.83	73.556	114.8	89.005	169.49	175.1	43.653				11745000	18120000	16854000	15972000	22450000	24155000	922110	834070	860370
Alanine--tRNA ligase;Alanyl-tRNA synthetase, cytoplasmic;Renal carcinoma antigen NY-REN-42;cDNA FLJ61339, highly similar to Alanyl-tRNA synthetase (EC 6.1.1.7)	IPI00027442;IPI00910701;REV__IPI00642861;REV__IPI00002978	IPI00027442;IPI00910701	AARS	P49588;B4DR45	0.432589		0.226309	0.317304	-0.213627	0.57525	1.16984	0.316365	1.246	0.862366	1.48994	36	30	10	106.81	968	40.6	31.3	11.1	137.17	134.46	90.092	116.64	78.433	33.747	110.28	130.26	57.905	153.36	135.71	33.453	47515000	98533000	103470000	41030000	139060000	83013000	6369100	17275000	31130000
Alanine--tRNA ligase;Alanyl-tRNA synthetase-like;Probable alanyl-tRNA synthetase, mitochondrial;AARS2 protein	IPI00394788	IPI00394788	AARS2;AARSL;KIAA1270	Q5JTZ9;A2VCL8	0.191102		-0.365573	-0.475997	-0.621431	0.000707094	0.77616	0.185666	0.71897	0.650026	1.00049	11	9	2	107.34	985	18.9	13.6	2.8	94.024	76.723	57.912	83.28	85.777	53.392	67.461	72.682	42.566	9.4007	47.174	56.575	11434000	14367000	11651000	4203000	21277000	6264200	164110	1486300	1013100
Alanyl aminopeptidase;Aminopeptidase M;Aminopeptidase N;gp150;Microsomal aminopeptidase;Myeloid plasma membrane glycoprotein CD13;cDNA FLJ56120, highly similar to Aminopeptidase N (EC 3.4.11.2);cDNA FLJ51269, highly similar to Aminopeptidase N (EC 3.4.11.2);cDNA FLJ55496, highly similar to Aminopeptidase N (EC 3.4.11.2);cDNA FLJ56158, highly similar to Aminopeptidase N (EC 3.4.11.2);Membrane alan…	IPI00221224	IPI00221224	ANPEP;APN;CD13;PEPN	P15144;B4DP01;B4DP96;B4DPH5;B4DV63;Q59E93;Q71E46;Q8IVL7	0.561175		-0.729776	0.852638	-0.307895	-2.73407	0.602998	0.833564	1.8058	0.80782	0.150301	26	27	9	109.54	967	23.1	26.9	5.7	101.63	96.103	141.03	73.634	77.137	33.923	62.885	91.204	62.124	62.886	56.744	31.125	31416000	56736000	57222000	97046000	159940000	103750000	47538000	63030000	41902000
Alcohol dehydrogenase [NADP+];Aldehyde reductase;Aldo-keto reductase family 1 member A1;Aldo-keto reductase family 1, member A1 (Aldehyde reductase)	IPI00220271;IPI00647702;IPI00153045;IPI00011902;IPI00644253;IPI00007392;IPI00795306	IPI00220271;IPI00647702	AKR1A1;ALDR1;ALR;RP4-697E16.2-004	P14550;Q5T621	0.0185077	+	1.86484	1.49835	1.73528	2.3609	3.64229	1.21553	2.8252	3.32945	5.1369	17	18	17	36.573	325	60	59.7	56.3	115.1	109.17	141.77	74.814	89.29	30.704	72.118	60.855	54.687	204.53	138.64	48.541	34757000	57077000	69470000	28754000	125420000	128140000	34704000	115310000	78995000
Alcohol dehydrogenase 5;Alcohol dehydrogenase class chi chain;Alcohol dehydrogenase class-3;Alcohol dehydrogenase class-III;Glutathione-dependent formaldehyde dehydrogenase;S-(hydroxymethyl)glutathione dehydrogenase;RcADH5;Alcohol dehydrogenase 5 (Class III), chi polypeptide;ADH5 protein;Alcohol dehydrogenase 5 (Class III), chi polypeptide, isoform CRA_a;cDNA, FLJ92689, highly similar to Homo sap…	IPI00746777	IPI00746777	ADH5;ADHX;FDH;hCG_41483	P11766;Q2VIM7;Q5U043;Q6FI45;Q6IRT1	0.027124	+	1.27503	1.21748	0.935862	1.67176	2.42005	0.64952	2.3254	1.91303	3.18603	10	7	9	39.724	374	21.4	17.9	25.4	96.478	108.12	127.66	55.505	57.06	34.018	72.969	72.856	23.276	134.63	133.44	26.121	9293900	59420000	45088000	8296300	40764000	26879000	10219000	52300000	22797000
Alcohol dehydrogenase PAN2;Retinol dehydrogenase 14;cDNA, FLJ95921, Homo sapiens retinol dehydrogenase 14 (all-trans and 9-cis)(RDH14), mRNA;Putative uncharacterized protein RDH14;Retinol dehydrogenase 14 (All-trans and 9-cis), isoform CRA_a	IPI00177940	IPI00177940	PAN2;RDH14;UNQ529/PRO1072;hCG_1641437	Q9HBH5;Q53RX3	0.481985		0.970614		0.0534338	1.88779	1.95967	1.88299		1.03773	3.70069	1	3	1	36.864	336	2.4	11.9	5.4	85.543	81.45	47.595				31.283	66.372	30.185	48.002	80.899	32.897	0	0	0	4442900	10195000	30893000	234020	3033600	882860
Aldehyde dehydrogenase 10;Aldehyde dehydrogenase family 3 member A2;Fatty aldehyde dehydrogenase;Microsomal aldehyde dehydrogenase;Aldehyde dehydrogenase 3A2 variant;Putative uncharacterized protein DKFZp686E23276;Aldehyde dehydrogenase 3 family, member A2, isoform CRA_a;ALDH3A2 protein;cDNA FLJ77712, highly similar to Homo sapiens aldehyde dehydrogenase 3 family, member A2 (ALDH3A2),mRNA;cDNA, F…	IPI00394758;IPI00333619;IPI00789301;IPI00384883;IPI00654709;IPI00296183;IPI00902542;IPI00940201;IPI00795549;IPI00796116;IPI00796823	IPI00394758;IPI00333619	ALDH10;ALDH3A2;FALDH;DKFZp686E23276;hCG_30680	P51648-2;P51648;P51648-1;Q59H65;Q68D64;Q6I9T3	0.00123828	+	-0.970695	-0.976986	-1.02652	-0.908582	0.51026	0.0210197	0.50804	0.490894	0.532708	15	7	1	57.669	508	28.9	14.4	2.6	97.955	101.6	65.309	120.71	159.86	43.269	82.815	63.249	107.22				31485000	36314000	35913000	22559000	80300000	19207000	959080	3255000	497390
Aldehyde dehydrogenase 5;Aldehyde dehydrogenase family 1 member B1;Aldehyde dehydrogenase X, mitochondrial;cDNA FLJ51238, highly similar to Aldehyde dehydrogenase X, mitochondrial (EC 1.2.1.3)	IPI00103467	IPI00103467	ALDH1B1;ALDH5;ALDHX	P30837;B4DLJ0	0.00135735	+	-1.92566	-1.86449	-1.84523	-2.06726	0.26322	0.0219325	0.27462	0.278311	0.238612	21	14	3	57.238	517	41	34	8.3	123.23	123.52	146.63	113	131.34	71.792	71.947	123.36	129.63	180.32	179.33	22.743	53584000	103490000	75951000	86660000	194960000	289750000	2012700	9773500	3258900
Aldehyde dehydrogenase family 1 member A1;Aldehyde dehydrogenase, cytosolic;ALDH-E1;ALHDII;Retinal dehydrogenase 1;cDNA FLJ51786, highly similar to Retinal dehydrogenase 1 (EC 1.2.1.36);cDNA FLJ50286, highly similar to Retinal dehydrogenase 1 (EC 1.2.1.36)	IPI00218914;IPI00910463;IPI00644628;IPI00644077;IPI00642144	IPI00218914;IPI00910463	ALDC;ALDH1;ALDH1A1;PUMB1	P00352;B4DDF8;B4DXX3	0.00894996	+	2.3913	1.95576	2.72461	2.49354	5.24631	1.38348	3.8792	6.60982	5.63158	6	9	6	54.861	501	15.2	20.6	16.2	181.44	124.19	148.29	19.912	90.941	76.265	49.469	64.43	49.722	141.81	133.41	104.27	5599600	23830000	9368000	54986000	96689000	31408000	12494000	8246300	8952600
Aldehyde dehydrogenase family 16 member A1;cDNA FLJ51525, highly similar to Homo sapiens aldehyde dehydrogenase 16 family, member A1 (ALDH16A1), mRNA;cDNA FLJ51526, highly similar to Homo sapiens aldehyde dehydrogenase 16 family, member A1 (ALDH16A1), mRNA;cDNA FLJ60673, highly similar to Homo sapiens aldehyde dehydrogenase 16 family, member A1 (ALDH16A1), mRNA	IPI00217920;IPI00910572;IPI00646424	IPI00217920;IPI00910572	ALDH16A1	Q8IZ83-1;Q8IZ83;B4DQ15;B4DVV1;B4DLQ1	0.136656		0.893365	1.59168	0.75217	0.336246	1.8575	0.914136	3.014	1.68432	1.26247	2	7	4	85.126	802	4.1	11.7	5.6	94.82	100.83	125.13	81.738	104.63	22.498	62.813	64.856	12.169	148.97	152.36	59.252	4185700	2339800	9506200	12619000	5577500	32894000	4896600	3122300	6187100
Aldehyde dehydrogenase family 18 member A1;Delta-1-pyrroline-5-carboxylate synthase;Gamma-glutamyl kinase;Gamma-glutamyl phosphate reductase;Glutamate 5-kinase;Glutamate-5-semialdehyde dehydrogenase;Glutamyl-gamma-semialdehyde dehydrogenase	IPI00008982;IPI00218547	IPI00008982;IPI00218547	ALDH18A1;GSAS;P5CS;PYCS	P54886-1;P54886;P54886-2	0.00416551	+	-1.56468	-1.42895	-1.50228	-1.76282	0.338052	0.0400571	0.3714	0.352995	0.294672	25	26	9	87.301	795	35.7	42.6	15.6	138.91	124.82	115.71	92.664	87.191	51.276	106.72	128.61	123.11	197.98	179.51	49.496	67922000	134450000	82986000	46353000	180610000	314440000	4505600	9987400	5994900
Aldehyde dehydrogenase family 4 member A1;Delta-1-pyrroline-5-carboxylate dehydrogenase, mitochondrial;cDNA FLJ54479, highly similar to Delta-1-pyrroline-5-carboxylatedehydrogenase, mitochondrial (EC 1.5.1.12)	IPI00217871;IPI00930698;IPI00647328;IPI00552848;REV__IPI00748402;IPI00925941;IPI00927448;IPI00793715;IPI00926600	IPI00217871;IPI00930698	ALDH4;ALDH4A1;P5CDH	P30038;B4DGE4	0.269949		0.460417	0.174662	0.137045	1.06954	1.37594	0.56864	1.1287	1.09965	2.09877	14	12	11	61.719	563	27.5	23.4	25.4	122.15	113.6	56.501	110.8	101.46	29.612	86.357	121.03	23.585	125.3	130.25	40.417	24505000	80368000	57625000	18117000	66886000	111560000	46936000	288690000	216900000
Aldehyde dehydrogenase family 6 member A1;Methylmalonate-semialdehyde dehydrogenase [acylating], mitochondrial;cDNA FLJ51820, highly similar to Methylmalonate-semialdehyde dehydrogenase[acylating], mitochondrial (EC 1.2.1.27);Methylmalonate semialdehyde dehydrogenase;Aldehyde dehydrogenase 6A1 variant	IPI00024990	IPI00024990	ALDH6A1;MMSDH;MMSADHA	Q02252;B2R609;B4DFS8;O43573;Q53FN8;Q53H94	0.517552		0.27247	-0.263438	0.150962	0.929885	1.20787	0.556449	0.8331	1.11031	1.90512	14	7	4	57.839	535	32.3	13.5	8.2	111.66	115.36	47.072	78.45	72.864	40.144	164.07	175.54	13.086	115.56	144.27	45.989	27276000	46329000	52334000	122520000	111570000	96206000	810430	3162200	4519900
Aldehyde dehydrogenase family 7 member A1;Alpha-aminoadipic semialdehyde dehydrogenase;Antiquitin-1;Betaine aldehyde dehydrogenase;Delta1-piperideine-6-carboxylate dehydrogenase;cDNA FLJ56008, highly similar to Aldehyde dehydrogenase family 7 member A1 (EC 1.2.1.3)	IPI00221234;IPI00936002;IPI00909694;IPI00910420;IPI00916990;IPI00916206;IPI00917139;IPI00917841	IPI00221234;IPI00936002;IPI00909694;IPI00910420	ALDH7A1;ATQ1	P49419;B4DMA0;C9J4D7;B4DIC7	0.329504		-0.299589	-0.242106	-0.73127	0.0746082	0.812484	0.225585	0.84551	0.602373	1.05307	30	26	12	58.486	539	54.4	49.5	28.4	118.16	118.45	49.193	121.82	128.97	58.771	70.214	105.75	87.079	202.76	184.64	25.481	155610000	247030000	162660000	117810000	469050000	201140000	12380000	77706000	87650000
Aldehyde dehydrogenase, mitochondrial;ALDH class 2;ALDH-E2;ALDHI;Mitochondrial aldehyde dehydrogenase 2 variant;ALDH2;cDNA FLJ50888, highly similar to Aldehyde dehydrogenase, mitochondrial (EC 1.2.1.3);Mitochondrial aldehyde dehydrogenase 2	IPI00006663;IPI00792207;IPI00795914	IPI00006663;IPI00792207	ALDH2;ALDM	P05091;Q53FB6;B0LUF9;B0LUG0;B0LUG2;B4DW54;B4YAH7;Q9UN17	0.246396		-0.400951	-0.306305	-0.868687	-0.0278618	0.757359	0.218129	0.80871	0.547645	0.980873	10	8	5	56.381	517	21.9	21.9	15.1	102.14	95.242	50.512	122.91	84.197	27.782	42.074	50.883	13.265	164.83	163.18	20.614	20119000	27489000	51710000	35373000	127590000	52707000	4064800	17110000	14970000
Aldehyde reductase;Aldo-keto reductase family 1 member B1;Aldose reductase;Aldo-keto reductase family 1, member B1 variant	IPI00413641;IPI00556258;IPI00926520;IPI00925567;IPI00879481	IPI00413641;IPI00556258	AKR1B1;ALDR1	P15121;Q59EL5	0.719357		0.257879	0.494467	-0.920979	1.20015	1.19572	0.884746	1.4088	0.52815	2.29764	10	14	13	35.853	316	38.9	45.3	42.1	105.28	101.38	72.814	34.799	53.986	23.013	76.737	89.816	101.24	153.82	108.94	17.472	4764000	23499000	12694000	67497000	76882000	140700000	11032000	83120000	46342000
Aldoketomutase;Glyoxalase I;Ketone-aldehyde mutase;Lactoylglutathione lyase;Methylglyoxalase;S-D-lactoylglutathione methylglyoxal lyase;cDNA FLJ51791, highly similar to Lactoylglutathione lyase (EC 4.4.1.5);Glyoxalase I variant	IPI00220766	IPI00220766	GLO1	Q04760;B4DDV0;Q59EL0	0.440576		0.642042		0.109919	1.17417	1.56054	0.832587		1.07917	2.25662	0	6	2	20.777	184	0	37	6.5	114.77	119.8	67.941				73.026	90.943	42.335	343.83	242.64	6.4034	0	0	0	64384000	152520000	78537000	5737500	2316800	19496000
Aldose 1-epimerase;Galactose mutarotase;cDNA FLJ75695, highly similar to Homo sapiens galactose mutarotase (aldose 1-epimerase) (GALM), mRNA;Galactose mutarotase (Aldose 1-epimerase);Putative uncharacterized protein LOC130589;Putative uncharacterized protein GALM;Ibd1 protein	IPI00060200;IPI00939637;IPI00184775;IPI00917473;IPI00382746;IPI00916994;IPI00915933;IPI00917237	IPI00060200;IPI00939637;IPI00184775;IPI00917473;IPI00382746	BLOCK25;GALM;hCG_15876;LOC130589;Ibd1	Q96C23;Q53RY1;C9JGU2;A6NFR8;B8ZZ75;Q12915	0.024895	+	2.07968	1.42331	2.29662	2.51911	4.22713	1.57866	2.682	4.91304	5.7323	2	4	6	37.765	342	7.3	15.8	28.4	118.88	147.16	203.97	104.99	85.806	15.202	68.775	86.846	13.678	210.59	103.06	47.864	746150	1023800	4580200	3124300	12031000	8582000	7443000	8504000	5801700
Alien homolog;COP9 signalosome complex subunit 2;JAB1-containing signalosome subunit 2;Thyroid receptor-interacting protein 15;COP9 constitutive photomorphogenic homolog subunit 2 variant;cDNA, FLJ93029, highly similar to Homo sapiens COP9 constitutive photomorphogenic homolog subunit 2 (Arabidopsis) (COPS2), mRNA;cDNA FLJ52928, highly similar to COP9 signalosome complex subunit 2	IPI00018813;IPI00743825	IPI00018813;IPI00743825	COPS2;CSN2;TRIP15	P61201-2;P61201;Q59EL2;P61201-1;B2R6N0;B4DIH5;Q53HJ0	0.129196		1.09068	1.37646	0.235399	1.66018	2.12974	1.0219	2.5963	1.17723	3.16056	3	5	1	52.404	450	11.3	17.1	5.1	110.56	101.09	79.739	155.2	142.33	19.726	74.805	72.007	11.642				18912000	61336000	44236000	16803000	25564000	82675000	386160	1030000	646520
Alkaline phosphatase liver/bone/kidney isozyme;Alkaline phosphatase, tissue-nonspecific isozyme;Alkaline phosphatase	IPI00419916;IPI00643764	IPI00419916	ALPL;hCG_38868	P05186;B2R6Q2;B7Z1D1;B7Z387;B7Z4Y6;Q9UIL5	0.195479		-2.25386	-0.730273	-1.46268	-4.56864	0.209662	0.281291	0.60279	0.362818	0.0421408	10	7	1	57.304	524	28.8	18.5	2.7	126.11	122.07	99.901	118.41	116.15	97.801	88.757	88.319	36.246				18275000	115170000	46778000	7637000	47685000	67460000	159610	152970	180250
Alkaline phosphatase Nagao isozyme;Alkaline phosphatase, placental-like;ALP-1;Germ cell alkaline phosphatase;Placental alkaline phosphatase-like;Alkaline phosphatase;Alkaline phosphatase Regan isozyme;Alkaline phosphatase, placental type;Placental alkaline phosphatase 1	IPI00290380;IPI00007289;IPI00298622;IPI00910839	IPI00290380;IPI00007289	ALPPL;ALPPL2;ALPP;PLAP	P10696;Q9UIL6;P05187;B2R7C7	0.354638		-1.26683	-0.477763	-2.05589		0.415573	0.337707	0.71809	0.2405		4	1	0	57.376	532	10.5	3	0	131.66	95.585	158.79	62.737	65.321	55.819							1708300	2325500	1809400	282080	167310	136230	0	0	0
Alkaline phosphodiesterase I;Ectonucleotide pyrophosphatase/phosphodiesterase family member 1;Membrane component chromosome 6 surface marker 1;Nucleotide pyrophosphatase;Phosphodiesterase I/nucleotide pyrophosphatase 1;Plasma-cell membrane glycoprotein PC-1;cDNA, FLJ95771, highly similar to Homo sapiens ectonucleotide pyrophosphatase/phosphodiesterase 1 (ENPP1), mRNA;Putative uncharacterized prot…	IPI00184311;IPI00478248	IPI00184311;IPI00478248	ENPP1;M6S1;NPPS;PC1;PDNP1;DKFZp686P13218	P22413;B2RBY8;Q7Z3P5;Q9NS95	0.325809		-1.05715	-0.46335	-1.65095		0.480581	0.2877	0.7253	0.318431		4	4	0	104.92	925	7.1	7.2	0	115.88	126.32	134.66	109.03	44.694	81.77	40.455	94.302	60.672				5318100	8313000	7188900	1801400	3208800	4035200	0	0	0
Ally of AML-1 and LEF-1;bZIP-enhancing factor BEF;THO complex subunit 4;Transcriptional coactivator Aly/REF	IPI00328840	IPI00328840	ALY;BEF;THOC4	Q86V81	0.141131		-0.848695	-0.699607	-1.52952	-0.316957	0.555287	0.229419	0.61574	0.346392	0.802761	11	8	12	27.557	264	34.8	36.7	42.8	141.78	130.18	69.418	143.37	79.384	63.164	74.81	71.866	60.133	211.81	119.32	64.923	3164600	28515000	8557400	62148000	40298000	21275000	2350600	71240000	47840000
Alpha E-catenin;Cadherin-associated protein;Catenin alpha-1;Renal carcinoma antigen NY-REN-13;cDNA FLJ36832 fis, clone ASTRO2010799, highly similar to ALPHA-1 CATENIN;cDNA FLJ54052, highly similar to Alpha-1 catenin (Cadherin-associated protein);cDNA FLJ54547, highly similar to Alpha-1 catenin (Cadherin-associated protein);cDNA FLJ54047, highly similar to Alpha-1 catenin (Cadherin-associated prot…	IPI00215948;IPI00473136;IPI00953077;REV__IPI00414972;REV__IPI00220929;REV__IPI00009859;REV__IPI00397946	IPI00215948;IPI00473136;IPI00953077	CTNNA1;hCG_1782385	P35221-1;P35221;B3KSR8;B4DKT9;B4DU00;B4E2G8;Q8N1C0;P35221-2;C9JMP9	0.117784		-0.659875	-0.350412	-1.15257	-0.476641	0.632933	0.177248	0.78436	0.449822	0.718649	55	50	22	100.07	906	71.6	64.6	30.4	136.38	129.83	56.525	137.81	109.73	50.693	119.27	127.71	53.211	165.68	125.59	40.566	137910000	323540000	332620000	124590000	256110000	346770000	65660000	384990000	304770000
Alpha T-catenin;Cadherin-associated protein;Catenin alpha-3;Catenin (Cadherin-associated protein), alpha 3, isoform CRA_a;cDNA FLJ78082, highly similar to Homo sapiens alphaT-catenin (CTNNA3) mRNA;cDNA, FLJ94516, highly similar to Homo sapiens catenin (cadherin-associated protein), alpha 3 (CTNNA3), mRNA	IPI00001712;IPI00654616;IPI00937961;IPI00645669;IPI00747120	IPI00001712	CTNNA3;hCG_1810899	Q9UI47-1;Q9UI47;A8K141	0.12303		2.73626		2.20078	3.27174	6.66341	3.57854		4.59728	9.6581	1	3	2	99.808	895	1.2	5.5	3.8	165.42	181.69	239.29				169.19	246.36	126.57	2.626	303.77	219.76	0	0	0	1049500	2333000	1169800	1174200	1387600	2045600
Alpha-1 protease inhibitor;Alpha-1-antiproteinase;Alpha-1-antitrypsin;Serpin A1;Short peptide from AAT;Alpha-1-antitrypsin NULL GENOVA variant;Alpha-1 antitrypsin Valcamonica variant;Alpha-1 antitrypsin;Alpha-1-antitrypsin MBrescia variant;Alpha-1-antitrypsin NULL(BRESCIA) variant	IPI00553177;IPI00790784;IPI00869004;IPI00305457;IPI00736763	IPI00553177;IPI00790784;IPI00869004	AAT;PI;PRO0684;PRO2209;SERPINA1	P01009-1;P01009;P01009-2;A6YP93;A7L8C5;A7L8C6;B2D098;Q13747;Q2L9S7;Q3I0J7;P01009-3	0.0817513		3.79438		4.28434	3.30443	13.8747	6.79255		19.4856	9.87947	0	9	6	46.736	418	0	24.9	11.7	116.75	157.1	205.13				81.617	119.31	161.31	158.78	120.92	84.382	0	0	0	30264000	24833000	28572000	14987000	7220800	6745100
Alpha-1 type I collagen;Collagen alpha-1(I) chain;Type II procollagen gene;Collagen type I alpha 1;Type I collagen alpha 1 chain	IPI00297646;IPI00922908;CON__Q862S4;IPI00871650;IPI00017530;IPI00025052	IPI00297646	COL1A1	P02452;Q14042;Q6LAN8;Q9UMA6	0.599736		0.81492	-1.81046	1.89943	2.35579	1.7592	2.48874	0.2851	3.73065	5.11876	6	6	12	138.91	1464	5.1	5.7	12	208.21	171.45	148.51	227.97	163.78	127.84	132.94	150.77	68.541	79.828	124.22	64.062	1467500	19352000	3533600	1904600	23301000	12058000	105670000	948760000	93770000
Alpha-1,3-mannosyl-glycoprotein 2-beta-N-acetylglucosaminyltransferase;N-glycosyl-oligosaccharide-glycoprotein N-acetylglucosaminyltransferase I;cDNA FLJ32632 fis, clone SYNOV1000190, highly similar to Alpha-1,3-mannosyl-glycoprotein2-beta-N- acetylglucosaminyltransferase (EC 2.4.1.101);cDNA FLJ33204 fis, clone ADRGL2007125, highly similar to Alpha-1,3-mannosyl-glycoprotein2-beta-N- acetylglucosa…	IPI00000138;IPI00179044	IPI00000138	GGNT1;GLCT1;GLYT1;MGAT;MGAT1	P26572;B3KQ18;B3KQW5;B3KRU8;Q59G70	0.593176		-0.723274	0.250113	-1.69666		0.605721	0.62282	1.1893	0.308499		3	1	0	50.862	445	8.1	3.1	0	38.496	96.539	110.35	47.654	68.889	100.02							3453700	3082000	19995000	127780	2668000	2088200	0	0	0
Alpha-1-fetoprotein;Alpha-fetoglobulin;Alpha-fetoprotein;cDNA FLJ51509, highly similar to Alpha-fetoprotein;cDNA FLJ57154, highly similar to Alpha-fetoprotein	IPI00022443	IPI00022443	AFP;HPAFP	P02771;B4DMW9;B4DMX4	0.0608748		3.63588		3.98462	3.28715	12.4311	4.29107		15.8303	9.76181	0	19	11	68.677	609	0	41.1	19.2	139.51	119.06	152.51				115.09	73.057	83.858	189.59	146.66	136.67	0	0	0	36981000	46434000	32894000	1425800	3892600	1644300
Alpha-2 type I collagen;Collagen alpha-2(I) chain;Collagen type I alpha 2;Putative uncharacterized protein COL1A2;COL1A2 protein	IPI00304962;IPI00941622;IPI00909936	IPI00304962	COL1A2	P08123;A2TIK1;Q75N18;Q7KZ71	0.487528		0.822351	-1.12139	1.91452	1.67392	1.76828	1.76787	0.45965	3.76989	3.19081	6	5	12	129.29	1366	5.6	4.4	16.4	197.35	168.83	135.79	86.138	71.62	46.381	114.59	117.21	15.785	210.18	115.29	153.12	1626900	3295800	1372800	2944600	14748000	7955500	104520000	133570000	96821000
Alpha-2-macroglobulin receptor;Apolipoprotein E receptor;Low-density lipoprotein receptor-related protein 1 515 kDa subunit;Low-density lipoprotein receptor-related protein 1 85 kDa subunit;Low-density lipoprotein receptor-related protein 1 intracellular domain;Prolow-density lipoprotein receptor-related protein 1;Low density lipoprotein-related protein 1 variant;LRP protein;Alpha-2 macroglobulin…	IPI00020557;IPI00448904;IPI00788728;IPI00385568;IPI00797187;IPI00789226;IPI00917576	IPI00020557	A2MR;APR;LRP1;LRP	Q07954;Q59FG2;Q6LAF4;Q6LBN5	0.168334		-0.197248	-0.331554	-0.0183493	-0.24184	0.872213	0.0998361	0.79468	0.987362	0.845666	32	25	1	504.57	4544	7.6	6.4	0.3	109.5	109.87	40.769	99.116	118.42	64.889	85.656	90.322	25.711	54.798			11689000	40278000	19337000	26960000	73690000	45069000	24349000	6359700	17646000
Alpha-2-macroglobulin receptor-associated protein;Low density lipoprotein receptor-related protein-associated protein 1;cDNA FLJ78417, highly similar to Homo sapiens low density lipoprotein receptor-related protein associated protein 1 (LRPAP1), mRNA;cDNA, FLJ93097, highly similar to Homo sapiens low density lipoprotein receptor-related protein associated protein 1 (LRPAP1), mRNA	IPI00026848	IPI00026848	A2MRAP;LRPAP1	P30533;A8K8F6;B2R6S9	0.147908		0.134047	0.036468	0.12781	0.237864	1.09737	0.0770303	1.0256	1.09263	1.17925	17	21	13	41.465	357	43.1	47.1	29.1	114.6	123.02	39.602	103.44	82.4	24.524	54.676	61.657	28.406	203.81	191.61	26.389	7393000	22081000	20208000	19311000	82747000	84877000	23380000	49105000	29129000
Alpha-2-macroglobulin;C3 and PZP-like alpha-2-macroglobulin domain-containing protein 5	IPI00478003;IPI00789547	IPI00478003	A2M;CPAMD5;FWP007	P01023;Q9BQ22	0.119028		1.93419		2.30009	1.56828	3.82163	1.38549		4.9249	2.96551	0	1	3	163.29	1474	0	0.8	2.4	110.29	55.04	26.407				68.576	46.006	8.5328	51.258	36.27	19.968	0	0	0	607930	621280	1075000	29324000	6496800	13041000
Alpha-actinin cytoskeletal isoform;Alpha-actinin-1;F-actin cross-linking protein;Non-muscle alpha-actinin-1;cDNA FLJ54432, highly similar to Alpha-actinin-1;Alpha-actinin 1;ACTN1 protein;cDNA FLJ59209, highly similar to Alpha-actinin-1;Actinin alpha 1 isoform b;cDNA FLJ40884 fis, clone UTERU2000607, highly similar to Alpha-actinin-1;Actinin 1 smooth muscle variant;Actinin, alpha 1, isoform CRA_e;…	IPI00013508;IPI00759776;IPI00909239;IPI00921118;IPI00791175	IPI00013508;IPI00759776;IPI00909239;IPI00921118	ACTN1;hCG_22243	P12814;B7Z2W3;Q5ZEZ4;A1L0V1;B4DHH3;Q1HE25;B3KUX9;B3V8S3;B4DFY0;B4DRP5;B7Z565;Q86TX4;B7TY16	0.133877		-0.394891	-0.317211	-0.704606	-0.162855	0.760547	0.142678	0.80262	0.61361	0.893256	62	69	36	103.06	892	67	70.4	38.6	116.94	100.72	69.865	111.27	53.675	46.448	77.614	77.934	56.085	131.94	117.36	55.222	191390000	380280000	132020000	107730000	160440000	205180000	29550000	117640000	89152000
Alpha-actinin skeletal muscle isoform 2;Alpha-actinin-2;F-actin cross-linking protein;Actinin, alpha 2, isoform CRA_b;cDNA, FLJ96254, highly similar to Homo sapiens actinin, alpha 2 (ACTN2), mRNA;cDNA FLJ51840, highly similar to Alpha-actinin-2;cDNA FLJ50104, highly similar to Alpha-actinin-2;cDNA FLJ55142, highly similar to Alpha-actinin-2;cDNA FLJ54277, highly similar to Alpha-actinin-2;cDNA FL…	IPI00019884	IPI00019884	ACTN2;hCG_1810883	P35609;B1ANE4;B2RCS5;B7Z2N5;B7Z4K1;B7Z4P6;B7Z4P8;B7Z4V1;Q59FD9	0.0320803	+	4.99387	6.41046	5.29342	3.27774	31.8644	37.9759	85.063	39.2172	9.69838	29	53	30	103.85	894	35	58.1	30.9	214.45	198.97	351.53	95.472	62.395	84.424	90.419	87.517	111.76	126.84	117.2	122.18	31912000	18900000	28213000	51858000	115060000	56983000	18200000	35291000	32534000
Alpha-actinin-4;F-actin cross-linking protein;Non-muscle alpha-actinin 4;ACTN4 protein;cDNA FLJ58087, highly similar to Alpha-actinin-4;Actinin alpha4 isoform	IPI00013808;IPI00908458;IPI00845465;IPI00908776;IPI00903019	IPI00013808;IPI00908458;IPI00845465	ACTN4	O43707;Q96BG6;B4E337;A4K467	0.524664		-0.204356	0.169155	-0.722728	-0.0594937	0.867926	0.264895	1.1244	0.60595	0.959601	68	75	35	104.85	911	66	69.6	39.5	120.22	97.42	74.834	117.22	64.651	44.011	84.065	83.796	61.61	139.94	127.98	60.397	246660000	953240000	460370000	225910000	371220000	548440000	62631000	178210000	233340000
Alpha-adducin;Erythrocyte adducin subunit alpha;Adducin 1 (Alpha);Adducin 1 (Alpha), isoform CRA_e;cDNA FLJ61270, highly similar to Alpha-adducin;cDNA FLJ57858, highly similar to Homo sapiens adducin 1 (alpha) (ADD1), transcript variant 4, mRNA;OTTHUMP00000041238;ADD1 protein	IPI00019901;IPI00220158;IPI00376220;IPI00253279	IPI00019901;IPI00220158;IPI00376220;IPI00253279	ADD1;ADDA;hCG_20629;RP11-520M5.1-003;LA04NC01-25A3.2-001;RP11-520M5.1-001	P35611-1;P35611;A2A3P0;P35611-3;A2A3N8;B4DI79;B4DPW4;P35611-2;Q16155;Q4TT76;Q86XM2;Q96D30	0.123845		1.05078	0.321005	1.73485	1.0965	2.07166	1.04325	1.2492	3.32845	2.13835	12	11	5	80.954	737	19	17.2	10.2	119.63	120.17	94.931	69.996	81.682	36.757	87.421	102.4	108.14	164.32	165.13	54.983	30970000	48819000	61894000	17236000	19589000	41299000	23480000	215510000	89388000
Alpha-aminoadipic semialdehyde synthase, mitochondrial;LKR/SDH;Lysine ketoglutarate reductase;Saccharopine dehydrogenase;Aminoadipate-semialdehyde synthase;Aminoadipate-semialdehyde synthase, isoform CRA_a;cDNA FLJ57358, highly similar to Alpha-aminoadipic semialdehyde synthase, mitochondrial	IPI00033217;IPI00924639;IPI00926352;IPI00927017;IPI00902536;REV__IPI00012795;REV__IPI00642205	IPI00033217;IPI00924639;IPI00926352;IPI00927017	AASS;hCG_33410;tcag7.61	Q9UDR5;A4D0W4;B4DFY7;C9JZ35;C9JPX6	0.0371702	+	-2.78651	-2.00381	-2.50172	-3.854	0.144936	0.090645	0.24934	0.176566	0.0691563	67	54	22	102.13	926	65.9	62	25.8	187.43	161.61	245.13	149.47	118.89	113.35	116.31	129.85	116.26	202.74	148.56	106.88	315290000	686220000	311350000	136840000	384660000	439710000	97968000	97637000	65423000
Alpha-coat protein;Coatomer subunit alpha;HEP-COP;Proxenin;Xenin;Xenopsin-related peptide	IPI00295857;IPI00646493	IPI00295857;IPI00646493	COPA	P53621-1;P53621;P53621-2	0.21853		0.513837	0.320543	0.136728	1.08424	1.42784	0.551347	1.2488	1.09941	2.12026	29	17	12	138.34	1224	26.9	18.5	11.1	103.14	101.16	97.809	52.388	90.178	48.263	65.909	76.613	60.805	76.967	77.358	27.357	13059000	40568000	31403000	18400000	69310000	58032000	108310000	104930000	403130000
Alpha-CP1;Heterogeneous nuclear ribonucleoprotein E1;Nucleic acid-binding protein SUB2.3;Poly(rC)-binding protein 1;cDNA, FLJ94964, highly similar to Homo sapiens poly(rC) binding protein 1 (PCBP1), mRNA;Poly(RC) binding protein 1;Putative uncharacterized protein PCBP1	IPI00016610;IPI00946082;IPI00945164;IPI00945892;IPI00946687;IPI00946372;IPI00947004	IPI00016610	PCBP1;hCG_1776997	Q15365;Q53SS8	0.225805		0.413387	-0.0127088	0.438913	0.813956	1.33181	0.383556	0.99123	1.35558	1.75803	15	13	15	37.497	356	47.5	52.5	56.2	115.62	100.78	51.823	64.621	58.81	28.867	83.785	83.509	39.55	214.08	155.08	33.635	59551000	215620000	129930000	177130000	479110000	443170000	55296000	326340000	451530000
Alpha-D-galactosidase A;Alpha-D-galactoside galactohydrolase;Alpha-galactosidase A;Melibiase;Galactosidase, alpha variant;cDNA FLJ76285, highly similar to Homo sapiens galactosidase, alpha (GLA), mRNA;Galactosidase, alpha;Galactosidase, alpha, isoform CRA_a	IPI00025869;IPI00909611	IPI00025869	GLA;hCG_20401;alpha-GalA	P06280;Q53HF3;Q53Y83;Q6LER7	0.0784728		-1.31366	-2.05745	-1.15322	-0.730314	0.402298	0.181992	0.24024	0.44962	0.602773	5	7	2	48.766	429	12.6	17.9	5.6	135.88	121.12	104.92	67.141	81.78	48.198	89.452	114.22	85.416	28.033	27.336	34.501	3112400	23549000	3482000	15155000	35110000	24076000	1148900	8806600	10586000
Alpha-dystroglycan;Beta-dystroglycan;Dystroglycan;Dystrophin-associated glycoprotein 1	IPI00028911;REV__IPI00743293;REV__IPI00398795	IPI00028911	DAG1	Q14118	0.49598		-0.91525	-0.0114856	-1.81901		0.530252	0.501095	0.99207	0.283415		3	3	0	97.44	895	4.5	3.4	0	153.31	129.61	102.16	87.658	88.888	97.875	156.9	95.088	66.627				2927600	1430200	1893300	786560	1662200	3949400	0	0	0
Alpha-galactosidase B;Alpha-N-acetylgalactosaminidase;N-acetylgalactosaminidase, alpha-	IPI00414909;IPI00917374;IPI00917198	IPI00414909;IPI00917374;IPI00917198	NAGA;CTA-250D10.21-005;CTA-250D10.21-004	P17050;B8ZZ36;B8ZZ35	0.050773		1.60171	0.881116	1.77967	2.14433	3.03502	1.30128	1.8418	3.43348	4.42087	2	2	1	46.564	411	7.3	7.5	2.7	67.573	103.46	124.73	6.0961	71.837	66.533	86.456	70.893	147.82				1436500	1030500	4325000	592580	3339000	414920	448230	363540	196710
Alpha-glucosidase 2;Glucosidase II subunit alpha;Neutral alpha-glucosidase AB;cDNA FLJ54035, highly similar to Neutral alpha-glucosidase AB;cDNA FLJ61290, highly similar to Neutral alpha-glucosidase AB;cDNA FLJ54057, highly similar to Neutral alpha-glucosidase AB	IPI00383581;IPI00441414	IPI00383581;IPI00441414	G2AN;GANAB;KIAA0088	Q14697-1;Q14697;B4DIW2;B4DJ30;B4DSM6;Q14697-3	0.0057387	+	-0.932929	-1.05562	-0.933422	-0.809744	0.523794	0.0447142	0.48109	0.523615	0.570483	43	41	27	112.92	995	47	44.2	30.2	97.11	100.8	36.895	102.91	94.471	1.6149							226640	10387000	743870	153870	1231000	4425100	25402	1263400	1477800
Alpha-glucosidase 2;Glucosidase II subunit alpha;Neutral alpha-glucosidase AB;cDNA FLJ59643, highly similar to Neutral alpha-glucosidase AB	IPI00011454	IPI00011454	G2AN;GANAB;KIAA0088	Q14697-2;Q14697;B4DZ53	0.019479	+	-0.555701	-0.530864	-0.433494	-0.702746	0.680326	0.0636017	0.69214	0.740466	0.614402	43	40	26	109.44	966	48.2	43.4	28.9	119.65	117.5	57.22	105.34	115.39	75.901	79.242	112.31	98.2	131.54	114.74	22.238	163050000	641370000	681980000	152060000	523040000	819960000	129670000	364700000	361050000
Alpha-II spectrin;Fodrin alpha chain;Spectrin alpha chain, brain;Spectrin, non-erythroid alpha chain	IPI00871535	IPI00871535	SPTA2;SPTAN1	Q13813-2;Q13813	0.652546		0.440933	1.16697	-0.285106		1.35748	1.00743	2.2454	0.820681		130	105	66	285.09	2477	50.4	42.2	31.1	68.871	124.06	100.57	78.024	102.44	24.891	10.519	27.215	16.696				226800	1581200	1766900	1007700	9039700	7919800	0	0	0
Alpha-II spectrin;Fodrin alpha chain;Spectrin alpha chain, brain;Spectrin, non-erythroid alpha chain;cDNA FLJ59116, highly similar to Spectrin alpha chain, brain;Putative uncharacterized protein SPTAN1	IPI00844215;IPI00879810	IPI00844215;IPI00879810	SPTA2;SPTAN1	Q13813-1;Q13813;B4DGT1;A6NG51	0.27125		0.455887	0.602837	-0.126576	0.891402	1.37163	0.475745	1.5187	0.916003	1.85498	129	105	66	284.54	2472	50.2	42.2	31.1	135.46	127.12	74.534	123.73	135.55	40.501	99.644	106.66	38.585	116.1	114.22	38.619	149700000	504500000	334560000	135080000	988650000	782300000	649260000	2943400000	2175300000
Alpha-L-fucosidase I;Alpha-L-fucoside fucohydrolase 1;Tissue alpha-L-fucosidase;cDNA, FLJ95493, highly similar to Homo sapiens fucosidase, alpha-L- 1, tissue (FUCA1), mRNA;Putative uncharacterized protein FUCA1;cDNA FLJ56770, highly similar to Tissue alpha-L-fucosidase (EC 3.2.1.51);cDNA FLJ52780, highly similar to Tissue alpha-L-fucosidase (EC 3.2.1.51)	IPI00843910;IPI00385751	IPI00843910;IPI00385751	FUCA1;Nbla10230	P04066;B2RBG3;B5MDC5;B7Z362;B7Z717	0.00624139	+	1.65657	1.39424	1.77172	1.80375	3.15266	0.477524	2.6285	3.4146	3.49125	3	3	1	53.688	466	8.4	8.4	3.6	88.284	103.92	148.43	31.7	43.171	13.796	36.142	8.1253	15.764				1815300	1844700	6480100	2483700	8034000	12701000	44139	653900	192390
Alpha-L-fucoside fucohydrolase 2;Plasma alpha-L-fucosidase;Novel protein similar to fucosidase, alpha-L-1, tissue FUCA1	IPI00012440;IPI00385461;IPI00385460	IPI00012440;IPI00385461	FUCA2;PSEC0151;UNQ227/PRO260;RP1-20N2.5;RP1-20N2.5-003	Q9BTY2;Q7Z6V2	0.0681799		1.08797	0.971001	1.20493		2.12574	0.243996	1.9602	2.30526		1	2	0	54.066	467	3.6	6.6	0	86.434	85.355	103.25				7.0255	54.376	0.33764				268880	380410	534090	5268000	3006100	10993000	0	0	0
Alpha-L-iduronidase;cDNA FLJ77574, highly similar to Homo sapiens iduronidase, alpha-L- (IDUA), mRNA;IDUA protein	IPI00018879	IPI00018879	IDUA	P35475;A8K701;Q56A80	0.31195		1.49666		2.29499	0.698342	2.82189	2.32274		4.90749	1.62264	0	2	2	72.669	653	0	6	4	123.81	78.405	95.792				12.325	14.623	26.948	173.6	3.4447	185.21	0	0	0	2443800	2558700	8369800	2713800	5430700	5671500
Alpha-mannosidase 2;Golgi alpha-mannosidase II;Mannosidase alpha class 2A member 1;Mannosyl-oligosaccharide 1,3-1,6-alpha-mannosidase;MAN2A1 protein	IPI00003802;IPI00027703;IPI00943037;IPI00936557;REV__IPI00937714	IPI00003802	MAN2A1;MANA2	Q16706;A5PKX5;Q49A69	0.233991		-0.831918	-0.511587	-1.15225		0.561782	0.177856	0.70145	0.449924		8	6	0	131.14	1144	8.5	5.3	0	131.16	109.76	106.73	87.405	117.31	79.141	58.483	64.964	77.595				9606000	7877600	14697000	1925000	5610100	6344600	0	0	0
Alpha-MPP;Mitochondrial-processing peptidase subunit alpha;P-55;Peptidase (Mitochondrial processing) alpha;PMPCA protein;cDNA FLJ54999, highly similar to Mitochondrial-processing peptidase alpha subunit, mitochondrial (EC 3.4.24.64)	IPI00166749;IPI00939351;IPI00908803;IPI00442912	IPI00166749;IPI00939351	INPP5E;KIAA0123;MPPA;PMPCA;hCG_1780842;RP11-413M3.1-001	Q10713;Q5SXM9;Q9BT52;B4DKL3	0.00303391	+	-1.54523	-1.57992	-1.67256	-1.38322	0.34264	0.0357624	0.3345	0.313696	0.383362	22	16	2	58.252	525	42.7	32.4	3.6	145.96	149.04	128.24	131.77	145.89	70.078	105.49	111.75	22.164	138.75	73.529	15.112	22252000	50885000	33358000	40968000	99256000	131580000	2651000	7825100	11528000
Alpha-NAC;Nascent polypeptide-associated complex subunit alpha;cDNA FLJ33331 fis, clone BRACE2000489, highly similar to Nascent polypeptide-associated complex subunit alpha;cDNA, FLJ92170, Homo sapiens nascent-polypeptide-associated complex alpha polypeptide (NACA), mRNA;HCG2016482, isoform CRA_b;Putative uncharacterized protein NACA	IPI00797126;IPI00023748;IPI00797259;IPI00909970;IPI00042122	IPI00797126;IPI00023748;IPI00797259	HSD48;NACA;hCG_2016482	Q13765;B2R4P8	0.970311		0.0158813	-0.000389475	-0.630685	0.678718	1.01107	0.482724	0.99973	0.64587	1.60072	7	6	6	94.68	925	7	6.5	10.8	120.36	130.9	97.872	71.489	79.506	32.021	76.805	84.553	34.207	140.27	135.58	34.022	11246000	26347000	25841000	49466000	117290000	70721000	10406000	131620000	72096000
Alpha-N-acetylglucosaminidase;Alpha-N-acetylglucosaminidase 77 kDa form;Alpha-N-acetylglucosaminidase 82 kDa form;N-acetyl-alpha-glucosaminidase;N-acetylglucosaminidase, alpha-(Sanfilippo disease IIIB), isoform CRA_a;Huntingtin interacting protein-1-related	IPI00008787;IPI00746033;IPI00555656	IPI00008787;IPI00746033;IPI00555656	NAGLU;UFHSD1;hCG_16571;ufHSD2	P54802;Q14769;Q59FD0	0.133411		1.50455		1.82455	1.18456	2.83736	0.897333		3.54195	2.27293	0	9	5	82.166	743	0	20.2	11	100.37	101.77	106.97				48.427	62.933	63.886	186.29	109.47	65.258	0	0	0	13215000	15886000	24997000	1628300	4840700	3825300
Alpha-PAK;p21-activated kinase 1;p65-PAK;Serine/threonine-protein kinase PAK 1;cDNA FLJ30666 fis, clone FCBBF1000627, highly similar to Serine/threonine-protein kinase PAK 1 (EC 2.7.11.1);cDNA FLJ51644, highly similar to Serine/threonine-protein kinase P>AK 1 (EC 2.7.11.1);cDNA FLJ77226, highly similar to Homo sapiens p21 activated kinase 1B (PAK1B) mRNA;cDNA FLJ51645, highly similar to Serine/th…	IPI00656138;IPI00289746	IPI00656138;IPI00289746	PAK1	Q13153-1;Q13153;B3KNX7;B7Z302;Q13153-2;A8KAN3;B7Z3K0	0.462995		-1.25959	-0.138537	-2.38065		0.417662	0.506583	0.90844	0.192023		11	4	4	60.646	545	24	9.7	14.1	130.38	133.08	104.84	147.17	153.95	22.596	110.05	56.232	106.9				10928000	76284000	22357000	3205800	26027000	5271400	0	405550	0
Alpha-SGT;Small glutamine-rich tetratricopeptide repeat-containing protein alpha;Vpu-binding protein;cDNA FLJ56566, highly similar to Small glutamine-rich tetratricopeptiderepeat-containing protein A	IPI00013949;IPI00908410	IPI00013949;IPI00908410	SGT;SGT1;SGTA	O43765;B4DEA6	0.0511469		1.53614	1.4958	0.931288	2.18135	2.90018	1.33464	2.8202	1.90698	4.53576	6	4	5	34.063	313	23.6	17.3	22.7	136.64	133.84	167.2	149.7	143.14	18.391	52.919	63.016	29.907	262.89	163.45	24.414	4602400	8604600	15122000	6901400	8418300	37125000	2943900	23501000	11195000
Alpha-soluble NSF attachment protein;N-ethylmaleimide-sensitive factor attachment protein alpha	IPI00009253	IPI00009253	NAPA;SNAPA	P54920	0.0399877	+	1.28584	1.7219	0.806468	1.32916	2.43824	0.774915	3.2987	1.74892	2.51256	4	5	4	33.232	295	11.2	24.7	22	127.41	131.63	114.16	86.507	68.131	59.322	39.044	29.841	23.838	258.2	138.44	18.031	2698000	32407000	24949000	8658300	11981000	47207000	3462900	8240700	20625000
Alpha-taxilin	IPI00470779;IPI00940138;IPI00902883;IPI00902722;IPI00008864	IPI00470779	TXLN;TXLNA	P40222	0.727417		0.180766	0.0973412	-0.55562	1.00058	1.13349	0.678475	1.0698	0.680365	2.0008	5	4	3	61.89	546	14.5	8.8	10.4	113	115.67	59.444	144.02	73.917	18.182	91.171	78.976	24.267	156.53	135.79	67.034	5331100	6417500	7875600	6419600	13333000	2798800	59901	468880	735790
Alpha-tropomyosin;Tropomyosin alpha-1 chain;Tropomyosin-1;TPMsk1	IPI00296039	IPI00296039	C15orf13;TMSA;TPM1	P09493-4;P09493;Q8TCG4	0.239163		0.430205	0.0734089	0.282281	0.934924	1.34742	0.456385	1.0522	1.21612	1.91179	27	29	25	32.847	284	58.8	65.1	62	186.4	178.02	153.43	194.19	131.47	111.45	149.14	136.56	75.71	206.07	189.16	62.208	9925000	102250000	23528000	75536000	188970000	187130000	31869000	443740000	156690000
Alpha-tropomyosin;Tropomyosin alpha-1 chain;Tropomyosin-1;Tropomyosin;Tropomyosin 1 alpha variant 6;TPM1 protein variant	IPI00384369	IPI00384369	C15orf13;TMSA;TPM1	P09493-5;P09493;Q07413;Q1ZYL5;Q59GR8	0.863212		-0.124534	-0.00388571	-1.28445	0.914739	0.9173	0.742457	0.99731	0.410526	1.88523	24	22	18	28.737	248	67.7	60.5	60.1	158.27	127.22	63.104	66.144	86.695	25.437	208.17	248.64	4.2868	184.98	136.15	11.995	270660	1670000	1998100	499300	3050600	1054400	1666800	20151000	11123000
Alpha-tubulin 1;Testis-specific alpha-tubulin;Tubulin alpha-1 chain;Tubulin alpha-4A chain;Tubulin H2-alpha;cDNA FLJ58687, highly similar to Tubulin alpha-4 chain;Putative uncharacterized protein TUBA4A;Tubulin, alpha 1 (Testis specific), isoform CRA_a	IPI00007750;IPI00794663;IPI00335314;IPI00916391;IPI00015671;IPI00872463;IPI00879904;IPI00794009;IPI00916823;IPI00797717;IPI00879535;IPI00942772;IPI00017454;IPI00917863;IPI00853556	IPI00007750;IPI00794663	TUBA1;TUBA4A;hCG_2013418	P68366;A8MUB1	0.372614		0.467139	-0.342982	0.981964	0.762436	1.38237	0.620544	0.78841	1.97515	1.69635	26	23	16	49.924	448	53.8	52.7	45.3	112.44	135.95	142.19	186.12	193.3	76.619	91.603	17.487	91.267	35.137	93.035	43.623	2972200	13472000	7359900	2402200	6617800	11913000	9131700	21891000	16096000
Alpha-tubulin 3;Tubulin alpha-1A chain;Tubulin alpha-3 chain;Tubulin B-alpha-1;Alpha-tubulin;cDNA FLJ53743, highly similar to Tubulin alpha-3 chain;Alpha-tubulin 2;Alpha-tubulin 3C/D;Tubulin alpha-2 chain;Tubulin alpha-3C/D chain;cDNA FLJ77591, highly similar to Homo sapiens tubulin, alpha 2 (TUBA2), transcript variant 1, mRNA;Tubulin, alpha 2;Tubulin, alpha 2, isoform CRA_b;Alpha-tubulin 3E;Tubu…	IPI00180675;IPI00936821;IPI00179709;IPI00218345;IPI00410402;IPI00909762;IPI00784332	IPI00180675;IPI00936821;IPI00179709;IPI00218345;IPI00410402	TUBA1A;TUBA3;TUBA2;TUBA3C;TUBA3D;hCG_19100;TUBA3E	Q71U36;A8K0B8;Q9UQM3;B4DQK4;Q13748-1;Q13748;Q1ZYQ1;Q13748-2;Q6PEY2	0.0156183	+	2.55441	3.15842	2.45095	2.05385	5.87426	2.46716	8.9285	5.46777	4.15213	35	35	27	50.135	451	69.6	70.1	59.2	141.83	147.17	230.41	100.48	74.977	72.85	58.509	68.834	63.772	189.16	96.477	51.932	25546000	64038000	108620000	23945000	152390000	73475000	5836800	14645000	12800000
Alpha-tubulin 6;Tubulin alpha-1C chain;Tubulin alpha-6 chain;Tubulin alpha 6 variant;cDNA FLJ55956, highly similar to Tubulin alpha-6 chain;TUBA1C protein	IPI00218343;IPI00387144;IPI00166768	IPI00218343;IPI00387144;IPI00166768	TUBA1C;TUBA6	Q9BQE3;Q53GA7;B7Z1K5;Q8N532	0.977073		-0.0229091	-1.42779	0.808639	0.550423	0.984246	0.728085	0.3717	1.75156	1.46451	34	34	26	49.895	449	65.3	65.7	55.7	80.235	80.201	85.892	9.7835	92.645	96.908	34.628	42.805	70.964	7.6964	15.525	22.56	13378000	37802000	19329000	17385000	71246000	61529000	964070	9070400	6244700
Alternative-splicing factor 1;pre-mRNA-splicing factor SF2, P33 subunit;Splicing factor, arginine/serine-rich 1;cDNA FLJ77645, highly similar to Homo sapiens splicing factor, arginine/serine-rich 1 (splicing factor 2, alternate splicing factor) (SFRS1), mRNA;Splicing factor, arginine/serine-rich 1 (Splicing factor 2, alternate splicing factor) variant	IPI00215884;IPI00218592;IPI00922361;IPI00306884	IPI00215884;IPI00218592	ASF;OK/SW-cl.3;SF2;SF2P33;SFRS1	Q07955-1;Q07955;A8K1L8;Q07955-3;Q59FA2	0.902554		-0.0468808	0.43328	-0.70044	0.126517	0.968027	0.372789	1.3503	0.615385	1.09166	18	17	15	27.744	248	50.8	58.5	47.2	133.86	110.84	49.23	158.94	84.904	52.045	63.169	74.326	56.835	271.97	157.07	38.708	5367300	35309000	14777000	31406000	188990000	227250000	15251000	151090000	153690000
Alveolar soft part sarcoma chromosomal region candidate gene 1 protein;Alveolar soft part sarcoma locus;Renal papillary cell carcinoma protein 17;Tether containing UBX domain for GLUT4;UBX domain-containing protein 9;Putative uncharacterized protein ASPSCR1	IPI00065276;IPI00332071;IPI00787285;IPI00385430;IPI00794238	IPI00065276;IPI00332071;IPI00787285;IPI00385430	ASPL;ASPSCR1;RCC17;TUG;UBXD9;UBXN9	Q9BZE9-2;Q9BZE9;Q9BZE9-1;Q9BZE9-3;Q9BZE9-4;C9JAL9	0.230493		0.809294		1.11582	0.502771	1.75235	0.530502		2.16718	1.41693	0	1	6	69.989	647	0	2.5	13.9	145.15	118.47	149.25							206.11	51.63	85.652	0	0	0	198230	222670	816090	519630	599730	904920
Amidophosphoribosyltransferase;Glutamine phosphoribosylpyrophosphate amidotransferase;cDNA FLJ78123, highly similar to Homo sapiens phosphoribosyl pyrophosphate amidotransferase (PPAT), mRNA;cDNA, FLJ92602, highly similar to Homo sapiens phosphoribosyl pyrophosphate amidotransferase (PPAT), mRNA;Phosphoribosyl pyrophosphate amidotransferase, isoform CRA_b;Phosphoribosyl pyrophosphate amidotransfe…	IPI00029534;IPI00556497	IPI00029534	GPAT;PPAT;hCG_2027246	Q06203;A8K4H7;Q53H22	0.098005		-2.0298	-1.08091	-1.64363	-3.36485	0.24489	0.188924	0.47273	0.320051	0.0970685	10	5	2	57.398	517	19.3	13	5.4	135.21	99.079	96.361	116.87	128.45	49.125	215.33	130.29	87.555	301.06	5.1859	215.91	8020700	20130000	14078000	9603200	22410000	9034400	430590	2110400	2112000
Amine oxidase [flavin-containing] A;Monoamine oxidase type A;cDNA FLJ61220, highly similar to Amine oxidase (flavin-containing) A (EC 1.4.3.4);Monoamine oxidase A;Monoamine oxidase A variant;cDNA FLJ76052, highly similar to Homo sapiens monoamine oxidase A (MAOA), nuclear gene encoding mitochondrial protein, mRNA;Monoamine oxidase A, isoform CRA_a	IPI00008483;IPI00328156;IPI00922603	IPI00008483	MAOA;hCG_16826;RP1-201D17__B.2-001	P21397;B4DF46;Q49A63;Q53EZ0;Q53YE7;Q5UL91;Q5UL94;Q5ULA3;Q5ULA9	0.392126		-0.440015	-0.128567	-0.751464		0.737127	0.226797	0.91474	0.594001		4	1	0	59.681	527	7.6	2.1	0	112.06	105.42	49.728	72.813	56.795	39.938							3585300	4333300	7436500	2836100	7380200	1253500	0	0	0
Aminoacylproline aminopeptidase;Cytosolic aminopeptidase P;Soluble aminopeptidase P;Xaa-Pro aminopeptidase 1;X-Pro aminopeptidase 1;X-prolyl aminopeptidase 1, soluble;cDNA FLJ76203, highly similar to Homo sapiens X-prolyl aminopeptidase (aminopeptidase P) 1, soluble (XPNPEP1), mRNA;cDNA FLJ36374 fis, clone THYMU2008185, highly similar to Xaa-Pro aminopeptidase 1 (EC 3.4.11.9);cDNA FLJ58474, highl…	IPI00793375;IPI00645898	IPI00793375;IPI00645898	XPNPEP1;XPNPEPL;XPNPEPL1;RP11-451M19.1-016	Q9NQW7-1;Q9NQW7;A8K071;B3KSI7;B4E2P4;B4DIS4;Q5T6H7	0.023154	+	1.40684	1.38355	1.04165	1.79531	2.65155	0.711849	2.6091	2.05859	3.4709	3	9	6	74.797	666	6	17.1	13.1	117.66	139.77	155.85	27.469	26.755	14.643	66.951	70.801	20.975	157.05	103.15	83.079	8368300	33147000	21848000	9520300	39533000	28007000	973910	1683200	1020800
Aminoacylproline aminopeptidase;Cytosolic aminopeptidase P;Soluble aminopeptidase P;Xaa-Pro aminopeptidase 1;X-Pro aminopeptidase 1;X-prolyl aminopeptidase 1, soluble;X-prolyl aminopeptidase (Aminopeptidase P) 1, soluble	IPI00607814;IPI00514564;IPI00643357;IPI00642642;IPI00641670;IPI00644779	IPI00607814	XPNPEP1;XPNPEPL;XPNPEPL1;RP11-451M19.1-002	Q9NQW7-2;Q9NQW7;Q5T6H2	0.021862	+	1.00216	1.01949	0.73298	1.25401	2.003	0.361492	2.0272	1.66207	2.38504	3	9	6	67.226	599	4.2	16.5	12	258.04	153.38	127.78										115400	695160	1298800	77889	468690	1887600	6650.8	106650	26662
Aminolevulinate, delta-, dehydratase;Delta-aminolevulinic acid dehydratase;Porphobilinogen synthase	IPI00790373;IPI00937974;IPI00442121	IPI00790373;IPI00937974;IPI00442121	ALAD;RP11-10I9.1-004	B7ZBK6;P13716-1;P13716;B7Z3I9;P13716-2;Q6ZMU0	0.0673834		2.73324		2.44285	3.02362	6.64945	1.90559		5.43715	8.13206	0	2	4	37.229	339	0	10.6	16.5	113.96	104.84	168.01				27.643	20.696	1.1161	254.65	135.91	88.042	0	0	0	7335700	1993300	8603400	6650400	5307200	3771900
Aminomethyltransferase, mitochondrial;Glycine cleavage system T protein;cDNA FLJ59850, moderately similar to Aminomethyltransferase, mitochondrial (EC 2.1.2.10);Aminomethyltransferase;cDNA FLJ59878, highly similar to Aminomethyltransferase, mitochondrial (EC 2.1.2.10)	IPI00299300;IPI00910686;IPI00793058;IPI00925396;IPI00926141;IPI00903299;IPI00644993;IPI00922488;IPI00790073	IPI00299300;IPI00910686;IPI00793058;IPI00925396;IPI00926141;IPI00903299	AMT;GCST	P48728;A8K3I5;B4DEE9;B4DJQ0;Q96IG6;B3KTU4;B4DE61;B4DGG9;B3KRJ7;C9JL06	0.45432		-0.204581	-0.381724	-0.0274372		0.867791	0.151068	0.76752	0.981162		3	4	0	43.946	403	8.9	10.9	0	152.52	124.98	81.718	65.898	125.74	79.422	274.13	275.51	47.684				3897600	2130200	1644100	1557900	9849400	2097500	0	0	0
Aminopeptidase B;Arginine aminopeptidase;Arginyl aminopeptidase	IPI00642211;IPI00642164	IPI00642211	APB;RNPEP	Q9H4A4;Q7RU04	0.0400528	+	1.03487	0.830012	0.812688	1.46192	2.04893	0.570321	1.7777	1.75648	2.75475	5	10	8	73.497	658	10.2	21.1	14	147.87	124.97	149.56	150.62	126.56	18.379	107.01	107.2	15.453	151.05	95.581	50.049	4535700	5836000	11027000	24928000	44130000	42176000	8648200	5855100	17813000
Aminopeptidase P3;Probable Xaa-Pro aminopeptidase 3;cDNA FLJ60363, weakly similar to Probable peptidase YER078C (EC 3.4.-.-);cDNA FLJ57499	IPI00550192;IPI00795212;IPI00922407;IPI00794503	IPI00550192;IPI00795212;IPI00922407;IPI00794503	XPNPEP3	Q9NQH7-1;Q9NQH7;B7Z7B2;Q9NQH7-2;B7Z790;Q9NQH7-3	0.401852		-0.345842	-0.0930328	-0.598651		0.786849	0.195995	0.93755	0.660371		3	2	1	57.033	507	8.3	6.7	1.4	87.031	64.783	69.678	34.212	16.404	6.2554							5166400	5340200	6193400	10442000	19078000	4085600	0	0	0
AMP deaminase 2;AMP deaminase isoform L;cDNA FLJ55345, highly similar to AMP deaminase 2 (EC 3.5.4.6);cDNA, FLJ95309, highly similar to Homo sapiens adenosine monophosphate deaminase 2 (isoform L)(AMPD2), mRNA;Adenosine monophosphate deaminase 2 (Isoform L)	IPI00184670;IPI00007722;IPI00942246;IPI00215827;IPI00215826	IPI00184670;IPI00007722;IPI00942246;IPI00215827;IPI00215826	AMPD2;RP5-1160K1.5-002	Q01433-2;Q01433;B4DK50;B2RB47;Q5T694;Q01433-1;Q01433-4;Q01433-3	0.0781163		1.74323	1.55193	0.956964	2.7208	3.34785	2.44993	2.9321	1.94122	6.59239	5	2	6	92.07	798	6.1	2.5	7	139.14	131.22	160.43	62.326	54.901	42.544	71.965	35.089	16.74	157.59	92.654	42.577	1960200	3647400	9979400	7876900	14207000	12046000	12652000	9305800	9714600
Amphiphysin II;Amphiphysin-like protein;Box-dependent myc-interacting protein 1;Bridging integrator 1;Myc box-dependent-interacting protein 1;Amphiphysin IIb-1;cDNA FLJ54942, highly similar to Homo sapiens bridging integrator 1 (BIN1), transcript variant 10, mRNA;cDNA FLJ60546, highly similar to Homo sapiens bridging integrator 1 (BIN1), transcript variant 3, mRNA	IPI00186966;IPI00395680;IPI00220996;IPI00220997;IPI00220587;IPI00220998;IPI00329733;IPI00221000;IPI00220999;IPI00220586;IPI00221001;IPI00922028;IPI00305486;IPI00386245;IPI00550792;IPI00795778	IPI00186966;IPI00395680;IPI00220996;IPI00220997;IPI00220587;IPI00220998;IPI00329733;IPI00221000;IPI00220999;IPI00220586;IPI00221001;IPI00922028	AMPHL;BIN1	O00499-1;O00499;Q659B7;O00499-5;O00499-2;Q8WWH9;O00499-3;O00499-11;O00499-6;O00499-4;O00499-8;Q9BTH3;O00499-7;O00499-10;O00499-9;B7Z6Y2;B7Z2Z2	0.156175		2.68395		2.012	3.35591	6.42614	4.38756		4.0334	10.2383	0	1	3	64.699	593	0	3	7.6	103.5	134.14	184.62				15.027	27.504	30.463	257.48	208.04	100.55	0	0	0	547110	1164800	2657800	436520	792150	330550
Amplaxin;Oncogene EMS1;Src substrate cortactin;Cortactin isoform a variant;Cortactin;cDNA FLJ34459 fis, clone HLUNG2002916, highly similar to SRC SUBSTRATE CORTACTIN;cDNA FLJ77423, highly similar to Homo sapiens cortactin (CTTN), transcript variant 2, mRNA;Cortactin, isoform CRA_c;cDNA FLJ54828, highly similar to Src substrate cortactin;Cortactin, isoform CRA_a;CTTN protein	IPI00029601;IPI00062884;IPI00746806;IPI00791680;IPI00792087	IPI00029601;IPI00062884;IPI00746806	CTTN;EMS1;hCG_23463	Q14247;Q53HG7;Q76MU0;B3KRK4;Q96H99;B4E358;Q8N707	0.82845		-0.161909	-0.495267	-1.0968	1.10634	0.893842	0.911325	0.70943	0.467552	2.15299	22	11	18	61.585	550	51.3	26	40	160.91	150.66	101.79	178.77	131.65	52.382	159.16	179.34	63.71	152.61	128.33	69.107	47424000	53158000	46537000	58278000	19357000	13657000	4773800	14976000	12920000
Amyloid beta precursor protein-binding protein 1, 59 kDa;Amyloid protein-binding protein 1;NEDD8-activating enzyme E1 regulatory subunit;Proto-oncogene protein 1;Putative uncharacterized protein NAE1;cDNA FLJ40361 fis, clone TESTI2034407, highly similar to NEDD8-activating enzyme E1 regulatory subunit;cDNA FLJ55878, highly similar to NEDD8-activating enzyme E1 regulatory subunit	IPI00018968;IPI00646350;IPI00604676;IPI00604652	IPI00018968;IPI00646350;IPI00604676;IPI00604652	APPBP1;HPP1;NAE1	Q13564;A6NCK0;B3KUP9;A6NFN4;A8MU28	0.177965		0.691123	0.66821	0.116567	1.28859	1.61454	0.686796	1.5891	1.08415	2.4429	10	5	3	60.246	534	17.6	12.5	7.5	155.74	133.61	132.11	100.81	76.119	21.478	186	192.59	20.289	122.84	132.17	24.891	19901000	54538000	26437000	4443000	19933000	18062000	11742000	5622400	4717900
Amyloid protein homolog;Amyloid-like protein 2;APPH;CDEI box-binding protein;cDNA FLJ46285 fis, clone TESTI4032128, highly similar to Amyloid-like protein 2 (Amyloid protein homolog) (APPH) (CDEI box-binding protein)(CDEBP);cDNA FLJ55927, highly similar to Amyloid-like protein 2 (CDEIbox-binding protein) (CDEBP);cDNA FLJ56216, highly similar to Amyloid-like protein 2 (CDEIbox-binding protein) (CD…	IPI00031030;IPI00220978;IPI00220977;IPI00884988;IPI00334946;IPI00954569	IPI00031030;IPI00220978;IPI00220977;IPI00884988;IPI00334946	APLP2;APPL2	Q06481-1;Q06481;Q06481-3;B3KXX9;Q06481-2;Q06481-4;B4DTV1;B4E3I5;Q06481-5;Q9UED0	0.00745321	+	-0.723752		-0.715278	-0.732226	0.605521	0.00502973		0.609088	0.601974	0	5	1	86.955	763	0	6.3	1.7	92.569	82.286	63.186				167.96	46.959	134.94				0	0	0	6177800	3657900	8331800	2873500	4627100	321550
Amyotrophic lateral sclerosis 2 chromosomal region candidate gene 1 protein;NIF3-like protein 1;Putative uncharacterized protein DKFZp762L015;NIF3L1 isoform beta;Putative uncharacterized protein NIF3L1;NIF3L1 isoform gamma	IPI00604624;IPI00873590;IPI00451430;IPI00451429;IPI00917949;IPI00916550;IPI00916417	IPI00604624;IPI00873590;IPI00451430;IPI00451429;IPI00917949;IPI00916550	ALS2CR1;MDS015;My018;NIF3L1;DKFZp762L015	Q9GZT8-1;Q9GZT8;Q9GZT8-2;Q658J0;Q6X735;C9JN42;Q6X734;B8ZZI0	0.34682		0.913521	1.46707	0.359971		1.88364	1.04737	2.7646	1.2834		3	2	1	41.968	377	10.9	8	7.4	113.89	104.03	95.014	150.27	144.2	28.311	110.66	116.33	17.343				4453100	3509600	10484000	526540	4060200	3277700	0	347800	0
Anamorsin;Cytokine-induced apoptosis inhibitor 1;Fe-S cluster assembly protein DRE2 homolog;cDNA FLJ58887, highly similar to Anamorsin (Cytokine-induced apoptosis inhibitor 1) (CUA001)	IPI00387130;IPI00025333;IPI00908414;IPI00513770	IPI00387130;IPI00025333;IPI00908414	CIAPIN1;CUA001;PRO0915	Q6FI81-1;Q6FI81;Q6FI81-3;B4DHB9	0.0988305		1.14719	0.433921	1.22965	1.77799	2.21482	1.03961	1.3509	2.34511	3.42947	2	2	3	33.582	312	7.7	7.7	12.5	136.96	136.44	143.98							332.68	155.08	41.782	87892	1539500	2389700	46992	988720	5192500	98467	1545400	1237700
Anaphase-promoting complex subunit 1;Cyclosome subunit 1;Mitotic checkpoint regulator;Testis-specific gene 24 protein	IPI00033907;IPI00889167;IPI00935517;IPI00787723;IPI00943656	IPI00033907	ANAPC1;TSG24	Q9H1A4	0.0655014		-0.841054	-0.754212		-0.927896	0.558236	0.0475501	0.59287		0.525624	3	0	2	216.5	1944	2.7	0	1.3	118.65	114.48	64.016	37.453	49.388	17.414				136.53	175.5	38.967	1202500	1159900	812980	0	0	0	2784900	14976000	1845500
Anaphase-promoting complex subunit 6;CDC16 homolog;Cell division cycle protein 16 homolog;Cyclosome subunit 6;cDNA, FLJ96326, highly similar to Homo sapiens CDC16 cell division cycle 16 homolog (S. cerevisiae) (CDC16), mRNA;Cell division cycle 16 homolog (S. cerevisiae);CDC16 cell division cycle 16 homolog (S. cerevisiae), isoform CRA_d;cDNA FLJ56731, highly similar to Cell division cycle protein…	IPI00022091;IPI00376312;IPI00376313;IPI00642377;IPI00556646	IPI00022091;IPI00376312;IPI00376313;IPI00642377	ANAPC6;CDC16;RP11-569D9.4-001;hCG_2011955;RP11-569D9.4-007	Q13042-1;Q13042;Q13042-2;B2RCW0;Q13042-3;Q5T8C6;B4DK74;Q7Z651	0.591007		-0.518646	0.174406	-1.2117		0.698027	0.492669	1.1285	0.43176		2	1	0	71.655	620	2.9	1.6	0	100.65	77.898	61.231										398740	740670	4089700	346890	1322600	347850	0	0	0
Anchor protein	IPI00477896;IPI00798152;IPI00015345;IPI00107312;IPI00748085;IPI00936108;IPI00218923;IPI00910320;IPI00935433;IPI00796771;IPI00927737;IPI00927484;IPI00925187	IPI00477896	RESDA1	Q5Y190	0.29595		-0.704684	-0.351259		-1.05811	0.613577	0.214705	0.7839		0.480261	2	0	2	453.23	4186	0.5	0	0.4	224.74	173.36	159.26	137.29	61.589	39.991				444.64	142.17	114.31	2163200	31463000	4335100	0	0	0	102240	2228600	1978900
Anchorin CII;Annexin A5;Annexin V;Annexin-5;Calphobindin I;Endonexin II;Lipocortin V;Placental anticoagulant protein 4;Placental anticoagulant protein I;Thromboplastin inhibitor;Vascular anticoagulant-alpha;cDNA FLJ52002, highly similar to Annexin A5	IPI00329801;IPI00872379;IPI00941153;IPI00168959;IPI00301364;IPI00172421	IPI00329801;IPI00872379	ANX5;ANXA5;ENX2;PP4	P08758;B4DNG6;Q6FHB3;A8MTE3	0.0188257	+	2.23215	2.83552	1.80198	2.05895	4.69834	1.94164	7.138	3.48699	4.16684	22	32	33	35.936	320	45.9	71.9	68.4	129.79	134.55	176.67	138.45	58.306	66.386	45.698	107.78	97.584	184.85	137.62	63.576	28070000	91646000	79092000	428080000	1402600000	455720000	89614000	361830000	197490000
Ancient ubiquitous protein 1;cDNA FLJ58836, highly similar to Ancient ubiquitous protein 1;cDNA FLJ76490, highly similar to Homo sapiens ancient ubiquitous protein 1 (AUP1), transcript variant 2, mRNA;cDNA FLJ57204, highly similar to Homo sapiens ancient ubiquitous protein 1 (AUP1), transcript variant 2, mRNA;Putative uncharacterized protein DKFZp686P12272	IPI00001891;IPI00215815;IPI00910371;IPI00917463	IPI00001891;IPI00215815;IPI00910371;IPI00917463	AUP1;DKFZp686P12272	Q9Y679-1;Q9Y679;B4DW71;Q9Y679-2;A8KAQ6;B4E3W1;Q9Y679-3;Q68CX8	0.481077		-0.546815	-0.0315773	-1.06205		0.68453	0.353129	0.97835	0.47895		4	1	0	53.028	476	14.1	6.3	0	156.62	111.5	57.677	39.674	28.369	53.503							1092000	3038200	3578000	143330	4124600	1752200	0	0	0
Androgen receptor cofactor p44;Methylosome protein 50;p44/Mep50;WD repeat-containing protein 77;cDNA FLJ55120, moderately similar to Methylosome protein 50;WD repeat domain 77;cDNA FLJ60601, highly similar to Methylosome protein 50	IPI00012202;IPI00908660;IPI00647794;IPI00909184	IPI00012202;IPI00908660;IPI00647794;IPI00909184	HKMT1069;MEP50;Nbla10071;WDR77;RP11-552M11.3-004	Q9BQA1;B4DP38;Q5QNY9;B4DJP0	0.0716234		1.30826	0.780646	1.12193	2.02221	2.47643	1.24239	1.7179	2.17637	4.06207	3	4	1	36.724	342	10.8	13.2	5	133.1	111.89	129.62	82.137	128.4	55.916	28.334	73.645	22.87				1633800	2865600	11259000	4335700	5065800	49225000	318250	305350	250430
Androgen-induced proliferation inhibitor;Androgen-induced prostate proliferative shutoff-associated protein AS3;Sister chromatid cohesion protein PDS5 homolog B;cDNA FLJ61699, highly similar to Homo sapiens androgen-induced proliferation inhibitor (APRIN), transcript variant 1, mRNA	IPI00240812;IPI00937545;IPI00845446;IPI00845353;IPI00845459;IPI00017258;IPI00743885;IPI00220041;IPI00848326;IPI00413606;IPI00845253	IPI00240812;IPI00937545;IPI00845446	APRIN;AS3;KIAA0979;PDS5B	Q9NTI5-1;Q9NTI5;Q9NTI5-2;B7Z5S1	0.991529		-0.00661891	0.402176	-1.10004	0.678003	0.995423	0.590646	1.3215	0.466505	1.59992	13	9	3	164.75	1448	11.3	8.6	4.4	108.21	104.07	74.03	72.26	127.41	78.909	73.437	38.879	79.118	20.954	13.447	26.121	5866400	19729000	11551000	9111400	18559000	16910000	30339000	14030000	51895000
Androgen-regulated short-chain dehydrogenase/reductase 1;HCV core-binding protein HCBP12;Prostate short-chain dehydrogenase/reductase 1;Retinal reductase 1;Retinol dehydrogenase 11;cDNA FLJ32633 fis, clone SYNOV2000171, highly similar to Retinol dehydrogenase 11 (EC 1.1.1.-);Retinol dehydrogenase 11 (All-trans and 9-cis), isoform CRA_a;cDNA FLJ53708, highly similar to Retinol dehydrogenase 11 (EC…	IPI00339384;IPI00339385;IPI00910248;IPI00163384	IPI00339384;IPI00339385;IPI00910248	ARSDR1;CGI-82;PSDR1;RDH11;hCG_21906	Q8TC12-1;Q8TC12;B3KQ19;Q0QD40;Q8TC12-2;A8K062;B4DDW0	0.0616812		-1.08336	-1.16757	-1.52472	-0.557778	0.47193	0.170519	0.44517	0.347548	0.679348	2	5	2	35.386	318	7.9	22	9.1	122.12	93.293	73.966	145.07	68.975	97.598	63.965	68.757	18.066				156680	542320	298240	7369900	32696000	10560000	46955	178470	938980
Angiotensin-binding protein;Microsomal endopeptidase;Mitochondrial oligopeptidase M;Neurolysin, mitochondrial;Neurotensin endopeptidase;cDNA FLJ76106, highly similar to Homo sapiens neurolysin (metallopeptidase M3 family) (NLN), mRNA;cDNA FLJ39097 fis, clone NTONG2000977, highly similar to Neurolysin, mitochondrial (EC 3.4.24.16);NLN protein	IPI00010346;IPI00025564;IPI00872224	IPI00010346;IPI00025564	AGTBP;KIAA1226;NLN	Q9BYT8;A8K9T8;B3KU23;Q9BQD0	0.0512504		-1.77326	-0.938348	-2.16758	-2.21384	0.292547	0.174833	0.52183	0.222583	0.215559	19	14	3	80.651	704	33.9	25	5.1	125.63	106.82	101.59	50.436	64.714	51.238	100.21	101.75	20.251	36.429	186.09	29.839	59648000	54554000	97268000	66906000	56300000	34847000	525210	1592600	380530
Anion exchange protein 2;Non-erythroid band 3-like protein;Solute carrier family 4 member 2;Anion exchanger 2 type a variant;AE2 anion exchanger;Anion exchanger 2 type b2;Anion exchanger 2 type a;cDNA FLJ58574, highly similar to Anion exchange protein 2;Anion exchanger 2 type b1;SLC4A2 protein	IPI00383597;IPI00946699;IPI00477139	IPI00383597;IPI00946699;IPI00477139	AE2;EPB3L1;HKB3;MPB3L;SLC4A2	P04920-1;P04920;Q59GF1;Q99654;Q9UEY5;Q9UEY6;B4DIT0;Q9UEY4;P04920-2;Q6PJY3;Q8TAG3	0.168689		-1.33342	-1.69526	-0.97159		0.396826	0.14223	0.3088	0.509944		3	2	0	137.01	1241	3.3	1.8	0	94.275	137.47	96.838	56.257	30.953	18.406	80.472	66.852	28.168				390430	365040	182200	35013	701990	1212400	0	0	0
ANKRD26-like family C member 1A;POTE ankyrin domain family member E;Prostate, ovary, testis-expressed protein on chromosome 2	IPI00479743;IPI00740545;IPI00935352;IPI00867651;IPI00937995;IPI00876919;IPI00942939;IPI00954450;IPI00739119;IPI00940675;IPI00436748;IPI00915457;IPI00479559;IPI00477130;IPI00479176;IPI00923388;IPI00478326;IPI00479941;IPI00878532;IPI00470333;IPI00470364;IPI00739095;IPI00470363;IPI00900335;IPI00479028;IPI00418137;IPI00929430;IPI00885048	IPI00479743;IPI00740545;IPI00935352	A26C1A;POTE2;POTEE	Q6S8J3-1;Q6S8J3	0.098391		-0.712818	-1.19426	-0.432318	-0.511873	0.610127	0.165272	0.43701	0.74107	0.701311	19	17	13	121.36	1075	12.7	11.3	10	55.773	52.965	69.382	14.181	34.118	30.945	34.429	64.202	109.96	45.72	43.038	10.106	65341000	67991000	89954000	15176000	34939000	118580000	2219800	22307000	18193000
Ankycorbin;Ankyrin repeat and coiled-coil structure-containing protein;Novel retinal pigment epithelial cell protein;Retinoic acid-induced protein 14;cDNA FLJ13073 fis, clone NT2RP3001854, highly similar to Ankycorbin;cDNA FLJ53145, highly similar to Ankycorbin	IPI00292953;IPI00759532;IPI00759780;IPI00910842;IPI00183206	IPI00292953;IPI00759532;IPI00759780;IPI00910842	KIAA1334;NORPEG;RAI14	Q9P0K7-2;Q9P0K7;Q9P0K7-1;Q9P0K7-3;B3KMZ9;B4DNL3	0.181701		-0.86213	-0.103768	-0.896698	-1.58592	0.55014	0.30371	0.9306	0.537115	0.333111	17	5	1	110.42	983	22	8.6	1.4	137.6	115.72	69.647	162.3	99.529	73.304	68.119	41.013	28.349				31325000	16500000	17853000	5518200	8891500	2606800	1227100	7514000	1033100
Ankyrin repeat and FYVE domain-containing protein 1;Ankyrin repeats hooked to a zinc finger motif;cDNA FLJ32485 fis, clone SKNMC2001596, highly similar to Ankyrin repeat and FYVE domain-containing protein 1;Putative uncharacterized protein DKFZp686M19106	IPI00159899	IPI00159899	ANKFY1;ANKHZN;KIAA1255;DKFZp686M19106	Q9P2R3-1;Q9P2R3;B3KPZ0;Q5H9P4	0.0741213		0.921987	1.43595	0.78421	0.545803	1.89472	0.65675	2.7056	1.72215	1.45983	3	3	2	132.82	1211	3.2	3.8	2.1	125.92	126.34	143.02	79.712	76.815	28.043	47.884	60.883	13.463	83.924	72.149	72.404	3229800	2469600	4068000	1661400	8258200	3619900	374450	2011100	1716300
Ankyrin repeat and SAM domain-containing protein 1A;Odin;cDNA FLJ60812, highly similar to Ankyrin repeat and SAM domain-containing protein 1A;ANKS1A protein	IPI00395663;IPI00641886	IPI00395663	ANKS1;ANKS1A;KIAA0229	Q92625;B4DQW8;Q05CP0	0.372823		2.52002	4.1914		0.848635	5.7359	11.6455	18.27		1.8008	2	0	2	123.11	1134	1.9	0	3.3	212.62	78.764	224.06	251.16	52.287	306.68							301340	866680	7359700	0	0	0	3720100	2648700	3789800
Ankyrin repeat domain-containing protein 35;cDNA FLJ58791, highly similar to Ankyrin repeat domain-containing protein 35	IPI00166331	IPI00166331	ANKRD35	Q8N283;B4DFX6	0.380907		-0.813096	-0.258822		-1.36737	0.569159	0.316906	0.83577		0.387597	2	1	1	109.96	1001	1.5	0.6	0.7	44.408	45.105	66.171	18.971	30.442	50.938							3360300	4124900	2680200	0	0	0	124530	1517300	149870
Ankyrin repeat-rich membrane-spanning protein;Kinase D-interacting substrate of 220 kDa;cDNA FLJ56432, highly similar to Homo sapiens kinase D-interacting substance of 220 kDa (KIDINS220), mRNA;cDNA FLJ56014, highly similar to Homo sapiens kinase D-interacting substance of 220 kDa (KIDINS220), mRNA;Putative uncharacterized protein DKFZp686H14204;cDNA FLJ61593, highly similar to Homo sapiens kinas…	IPI00885055;IPI00885052;IPI00384909;IPI00945435;IPI00945293;IPI00183964;IPI00946906;IPI00884985;IPI00947245	IPI00885055;IPI00885052;IPI00384909;IPI00945435;IPI00945293;IPI00183964	ARMS;KIAA1250;KIDINS220;DKFZp686H14204	Q9ULH0-1;Q9ULH0;Q9ULH0-4;B4DG84;Q9ULH0-2;B4DI12;Q7Z322;B4DK94;B4DGY1;Q9ULH0-3	0.715905		0.189333	0.585059	-0.206393		1.14024	0.447881	1.5001	0.866701		6	2	0	196.54	1771	4.3	1.8	0	92.392	81.482	37.007	67.013	43.918	39.776	29.151	24.917	25.38				2055000	2131700	5080300	556520	5836500	929240	0	0	0
Ankyrin-2;Ankyrin-B;Brain ankyrin;Non-erythroid ankyrin;Putative uncharacterized protein DKFZp686P0948	IPI00007834;IPI00384928;IPI00953101	IPI00007834	ANK2;DKFZp686P0948	Q01484-1;Q01484;Q7Z307	0.0980498		2.57998		2.98051	2.17945	5.97932	2.3779		7.89266	4.52981	2	3	8	430.25	3924	0.5	0.8	2.8	136.13	163.05	204.37							74.652	87.518	28.428	0	0	0	589070	497850	571700	50054000	16583000	23021000
Ankyrin-3;Ankyrin-G;cDNA FLJ58990, highly similar to Ankyrin-3;Ankyrin G119;Putative uncharacterized protein DKFZp686I225;Ankyrin 3, node of Ranvier (Ankyrin G);Putative uncharacterized protein DKFZp686P17114;Ankyrin 3, node of Ranvier (Ankyrin G), isoform CRA_d;cDNA FLJ78657, highly similar to Homo sapiens ankyrin 3, node of Ranvier (ankyrin G) (ANK3), transcript variant 2, mRNA;cDNA FLJ35208 fi…	IPI00921566;IPI00939165;IPI00909984;IPI00871968;IPI00871666;IPI00939328;IPI00333558;IPI00472779	IPI00921566;IPI00939165;IPI00909984;IPI00871968;IPI00871666;IPI00939328	ANK3;DKFZp686I225;RP11-369L1.2-008;DKFZp686P17114;hCG_1812776;RP11-369L1.2-010;DKFZp566P0524	Q12955;B4DIL1;Q13484;Q5CZH9;Q5JSX5;Q7Z3G4;A8KA62;B1AQT2;Q8NAK2;Q9H0P5;Q6ZT73	0.410219		0.387516	0.157044	-0.115699	1.1212	1.30814	0.674472	1.115	0.922935	2.17528	11	6	6	480.4	4377	2.9	1.6	2	160.7	149.46	102.07	118.01	69.423	45.351	154.35	163.8	58.501	130.23	122.15	53.92	8927400	11210000	40677000	5680300	18963000	10366000	22376000	16025000	55602000
Annexin A1;Annexin I;Annexin-1;Calpactin II;Calpactin-2;Chromobindin-9;Lipocortin I;p35;Phospholipase A2 inhibitory protein;ANXA1 protein;Annexin A1, isoform CRA_a;cDNA FLJ51887, highly similar to Annexin A1	IPI00218918;IPI00908577;IPI00549413;IPI00643231;IPI00302742;IPI00827810	IPI00218918;IPI00908577;IPI00549413	ANX1;ANXA1;LPC1;hCG_17305;RP11-71A24.1-002;RP11-71A24.1-004	P04083;B5BU38;Q05BR2;Q5TZZ9;B4DL19;Q5T3N1	0.00729101	+	1.57877	1.84471	1.49143	1.40019	2.98716	0.507516	3.5918	2.81167	2.63936	31	29	22	38.714	346	68.8	78.6	58.7	104.09	112.3	121.22	119.84	73.361	99.909	57.261	83.935	84.603	159.97	127.04	30.499	59855000	192610000	107680000	426640000	658950000	429670000	41481000	80780000	63685000
Annexin A2;Annexin II;Annexin-2;Calpactin I heavy chain;Calpactin-1 heavy chain;Chromobindin-8;Lipocortin II;p36;Placental anticoagulant protein IV;Protein I;Annexin A2 pseudogene 2;Lipocortin II pseudogene;Putative annexin A2-like protein;cDNA FLJ34687 fis, clone MESAN2000620, highly similar to Annexin A2	IPI00418169;IPI00455315;IPI00334627;IPI00797556;IPI00903334;IPI00909509;IPI00795925;IPI00798111;REV__IPI00171134;REV__IPI00943263;REV__IPI00654603;REV__IPI00893693;REV__IPI00893391;REV__IPI00893288	IPI00418169;IPI00455315;IPI00334627;IPI00797556;IPI00903334	ANX2;ANX2L4;ANXA2;CAL1H;LPC2D;ANX2L2;ANX2P2;ANXA2P2;LPC2B	P07355-2;P07355;P07355-1;A6NMY6;B3KRQ1	0.0355543	+	1.47857	2.02521	1.35402	1.05649	2.78673	1.03943	4.0705	2.55624	2.07987	35	42	30	40.411	357	69.2	84	73.4	92.283	99.743	96.139	157.76	58.528	100.01	42.378	122.85	115.49	173.04	131.62	27.001	39056000	79718000	62833000	383790000	665200000	589830000	47839000	228780000	115930000
Annexin A4;ANXA4 protein;cDNA, FLJ96576, Homo sapiens annexin A4 (ANXA4), mRNA;Proliferation-inducing protein 28;Putative uncharacterized protein ANXA4;35-beta calcimedin;Annexin IV;Annexin-4;Carbohydrate-binding protein p33/p41;Chromobindin-4;Endonexin I;Lipocortin IV;P32.5;Placental anticoagulant protein II;PP4-X;Protein II;cDNA FLJ52218, highly similar to Annexin A4;cDNA FLJ51794, highly simil…	IPI00793199;IPI00872780	IPI00793199;IPI00872780	ANXA4;hCG_39482;PIG28;ANX4;DKFZp686H02120	Q6LES2;P09525;B4DDF9;B4DDZ4;B4DE02;B4E1S2;Q59FK3;Q6MZI0;Q6P452	0.00961559	+	2.71929	3.00464	2.18246	2.97075	6.58546	1.96137	8.0258	4.53926	7.83945	9	13	13	36.085	321	29.6	51.1	45.5	107.98	97.094	121.07	88.462	50.627	27.787	30.951	46.981	29.542	188.55	132.17	73.479	2754400	6377200	6242700	22583000	63611000	36735000	10465000	21203000	14130000
Annexin A7;Annexin VII;Annexin-7;Synexin;cDNA, FLJ92798, highly similar to Homo sapiens annexin A7 (ANXA7), transcript variant 2, mRNA;cDNA, FLJ93494, highly similar to Homo sapiens annexin A7 (ANXA7), transcript variant 1, mRNA;Annexin VII isoform 1 variant;cDNA FLJ54149, highly similar to Annexin A7;cDNA FLJ54191, highly similar to Annexin A7;cDNA FLJ55060, highly similar to Annexin A7	IPI00002460;IPI00021771;IPI00953297;REV__IPI00337386;REV__IPI00337385;REV__IPI00337387;REV__IPI00465345;REV__IPI00909774;REV__IPI00789604;REV__IPI00397509;REV__IPI00873725	IPI00002460;IPI00021771;IPI00953297	ANX7;ANXA7;OK/SW-cl.95;SNX	P20073-1;P20073;B2R657;B2R7L2;Q53HM8;P20073-2;B4DT77;B4DWU2;B4DHY4	0.117071		0.984896	1.33737	1.3728	0.244514	1.97917	0.793684	2.5269	2.58973	1.18469	10	11	5	52.739	488	22.1	26	12.3	86.179	101.86	78.26	105.37	130.34	13.269	65.918	92.122	48.041	60.576	36.391	44.949	6708700	26058000	30124000	20666000	21429000	76429000	1723800	2648600	3391100
ANO6 protein;Anoctamin-6;Transmembrane protein 16F;cDNA FLJ59290, highly similar to Transmembrane protein 16F;cDNA FLJ57678, highly similar to Transmembrane protein 16F;Putative uncharacterized protein ANO6;cDNA FLJ44445 fis, clone UTERU2020718, highly similar to Transmembrane protein 16F	IPI00917081;IPI00151710;IPI00910110;IPI00941310;IPI00942795;IPI00798252	IPI00917081;IPI00151710;IPI00910110;IPI00941310;IPI00942795;IPI00798252	ANO6;TMEM16F	B9EGG0;Q4KMQ2;B4E1V1;B4DZA5;C9JCS2;B3KX12	0.712104		-0.538687	0.570171	-1.64754		0.688397	0.824145	1.4847	0.319183		3	1	0	108.43	931	4.8	2.4	0	85.945	79.755	60.716	95.473	81.603	14.821							12081000	4028600	6887500	5813100	2504800	735150	0	0	0
Anthracycline-associated resistance ARX;SUMO-activating enzyme subunit 2;Ubiquitin-like 1-activating enzyme E1B;cDNA, FLJ96587, highly similar to Homo sapiens SUMO-1 activating enzyme subunit 2 (UBA2), mRNA;cDNA FLJ13058 fis, clone NT2RP3001587, highly similar to Ubiquitin-like 1-activating enzyme E1B;cDNA FLJ14052 fis, clone HEMBA1006914, highly similar to Ubiquitin-like 1-activating enzyme E1B;…	IPI00023234	IPI00023234	HRIHFB2115;SAE2;UBA2;UBLE1B	Q9UBT2;B2RDF5;B3KMZ6;B3KNA3;B3KWB9;B7Z5X0	0.275972		0.544164	0.920141	-0.188907	0.901257	1.45817	0.579055	1.8923	0.87727	1.86769	18	13	12	71.223	640	33.4	23.8	15.5	146.21	131.83	127.99	129.72	88.699	47.98	72.813	87.39	22	144.49	129.78	59.578	14757000	76029000	69372000	10351000	46834000	32660000	30653000	66652000	69318000
Antiapoptosis clone 11 protein;Apoptosis inhibitor 5;Cell migration-inducing gene 8 protein;Fibroblast growth factor 2-interacting factor;Protein XAGL;cDNA FLJ53886, highly similar to Apoptosis inhibitor 5;cDNA FLJ52148, highly similar to Apoptosis inhibitor 5	IPI00554742;IPI00555572;IPI00908668;IPI00555743;IPI00910664;REV__IPI00909441;REV__IPI00216710;REV__IPI00418178	IPI00554742;IPI00555572;IPI00908668;IPI00555743;IPI00910664	API5;MIG8	Q9BZZ5-2;Q9BZZ5;Q9BZZ5-1;B4DGR0;Q9BZZ5-3;B4DDR3	0.484124		-0.24238	0.174406	-0.786513	-0.115033	0.84535	0.277275	1.1285	0.579744	0.923361	19	10	5	56.769	504	38.9	26	11.1	111.17	105.32	51.924	107.25	88.639	26.767	89.76	77.498	46.271	144.72	138.72	29.582	29908000	40369000	67699000	18092000	109990000	37732000	6613900	34042000	22541000
Antigen KI-67;cDNA FLJ56929, highly similar to Antigen KI-67	IPI00004233;IPI00413173	IPI00004233;IPI00413173	MKI67	P46013-1;P46013;P46013-2;B4DRH3	0.350446		-1.96182	-0.757721	-3.16591		0.256705	0.339418	0.59143	0.111421		10	5	0	358.69	3256	3.5	2.9	0	158.25	121.31	166.81	173.59	123.69	90.464	142.86	79.093	141.01				14757000	9357900	8002400	3102100	3200700	2633700	0	0	0
Antigen NY-CO-16;Serologically defined colon cancer antigen 16;U3 small nucleolar RNA-associated protein 14 homolog A;cDNA FLJ53406, highly similar to U3 small nucleolar RNA-associated protein 14 homolog A	IPI00107113;IPI00607550;IPI00940505;IPI00550793	IPI00107113;IPI00607550;IPI00940505	SDCCAG16;UTP14A	Q9BVJ6-1;Q9BVJ6;B4DQ08;Q9BVJ6-2;O60531	0.261831		-1.29946	-0.732692	-1.86624		0.406277	0.231572	0.60178	0.274288		4	2	0	87.977	771	6.1	2.9	0	136.35	102.39	136.11	65.368	125.44	124.23	94.913	0.76265	97.634				4812200	3922900	3715200	816660	2436600	3170400	0	0	0
Antigen NY-CO-25;Heat shock 110 kDa protein;Heat shock protein 105 kDa;cDNA FLJ55325, highly similar to Heat-shock protein 105 kDa;cDNA FLJ52364, highly similar to Heat-shock protein 105 kDa;Heat shock 105kDa/110kDa protein 1, isoform CRA_b;cDNA FLJ52360, highly similar to Heat-shock protein 105 kDa;cDNA FLJ51707, highly similar to Heat-shock protein 105 kDa	IPI00939163;IPI00218993;IPI00514983;IPI00513743;IPI00908988;IPI00910755;IPI00794417;IPI00910341	IPI00939163;IPI00218993;IPI00514983;IPI00513743;IPI00908988;IPI00910755	HSP105;HSP110;HSPH1;KIAA0201;hCG_32198	Q92598-1;Q92598;B4DF68;Q92598-2;B4DYH1;Q92598-3;B4DY72;B4DZB4	0.0315729	+	1.00367	1.3562	0.744197	0.91061	2.00509	0.463326	2.5601	1.67504	1.87984	23	22	15	96.864	858	31	33.3	22	153.61	135.07	127.63	124.89	86.094	18.803	107.68	148.93	59.34	125.96	118.9	30.102	16349000	68671000	126690000	37414000	100230000	150600000	20349000	65934000	101420000
Antigen NY-CO-4;Elongation factor 1-delta;cDNA FLJ57946, highly similar to Elongation factor 1-delta	IPI00023048;IPI00796284;IPI00795920;IPI00792430	IPI00023048;IPI00796284;IPI00795920	EEF1D;EF1D	P29692-1;P29692;B4DDU4	0.219453		0.428858	0.122209	0.255977	0.908388	1.34617	0.42802	1.0884	1.19414	1.87695	17	15	17	31.121	281	55.2	47.3	60.5	128.62	128.9	112.69	105.01	64.819	36.354	61.923	58.996	31.844	206.83	176.37	32.02	18239000	105980000	29011000	35720000	174730000	123780000	45302000	187310000	172220000
Antigen NY-CO-7;Carboxy terminus of Hsp70-interacting protein;CLL-associated antigen KW-8;E3 ubiquitin-protein ligase CHIP;STIP1 homology and U box-containing protein 1	IPI00025156;IPI00645380	IPI00025156;IPI00645380	CHIP;PP1131;STUB1	Q9UNE7-1;Q9UNE7;Q9UNE7-2	0.619094		-0.171409	-0.0488751	-0.731096	0.265743	0.887975	0.302196	0.96669	0.602446	1.20226	4	1	1	34.856	303	17.5	3.3	4.6	120.49	123.4	43.93	83.753	52.097	51.985	40.629	15.572	26.002				161490	1481500	705440	1627200	3417200	5605800	226070	429940	1712500
Antigen p25;Chromobox protein homolog 5;Heterochromatin protein 1 homolog alpha;CBX5 protein	IPI00024662	IPI00024662	CBX5;HP1A	P45973;Q6I9T7	0.0977176		1.3679		1.15627	1.57953	2.58095	0.537347		2.22881	2.98873	0	2	6	22.225	191	0	15.7	26.7	154.49	142.05	135.58				203.97	200.54	17.288	81.571	128.19	53.699	0	0	0	7065300	4038400	18166000	3582300	25574000	7148500
Antioxidant enzyme AOE372;Peroxiredoxin IV;Peroxiredoxin-4;Thioredoxin peroxidase AO372;Thioredoxin-dependent peroxide reductase A0372;Putative uncharacterized protein PRDX4	IPI00011937;IPI00938009;IPI00647280;IPI00639945;IPI00640466	IPI00011937;IPI00938009;IPI00647280	PRDX4	Q13162;A6NJJ0	0.16196		-0.39169		-0.289834	-0.493545	0.762236	0.0761683		0.817996	0.710278	1	12	8	30.54	271	4.4	43.2	29.5	106.6	108.71	58.22				58.705	104.53	57.011	209.38	129.97	45.025	0	0	0	59202000	176080000	187190000	1978300	22846000	23100000
Antioxidant protein 1;HBC189;Peroxiredoxin III;Peroxiredoxin-3;Protein MER5 homolog;Thioredoxin-dependent peroxide reductase, mitochondrial;Peroxiredoxin 3 isoform a;Peroxiredoxin 3 isoform a variant;Humer	IPI00024919;IPI00374151	IPI00024919;IPI00374151	AOP1;PRDX3;mer5	P30048;A4UCS5;Q53HC2;Q14579	0.31123		-0.0577127		-0.0270125	-0.088413	0.960786	0.0289163		0.981451	0.940557	0	11	7	27.692	256	0	46.9	25.4	102.88	99.334	52.494				41.642	80.325	72.098	153.76	161.36	33.353	0	0	0	18692000	141640000	133400000	14673000	158280000	107170000
AP-1 complex subunit gamma-like 2;Gamma2-adaptin;cDNA FLJ56213, highly similar to Adapter-relatedprotein complex 1 gamma- 2 subunit;Full-length cDNA clone CS0DI003YF22 of Placenta of Homo sapiens (human);Full-length cDNA clone CS0DE001YK01 of Placenta of Homo sapiens (human);AP1G2 protein	IPI00027178;IPI00908750	IPI00027178;IPI00908750	AP1G2	O75843;B4E3E1;Q86U03;Q86U41;Q86V28	0.457252		-0.812689	-0.102419	-1.52296		0.56932	0.412596	0.93147	0.347971		3	1	0	87.116	785	3.7	1.3	0	103.46	96.616	110.74	195	179.82	62.787							686670	1085800	480880	913430	1119400	353640	0	0	0
APC-binding protein EB1;End-binding protein 1;Microtubule-associated protein RP/EB family member 1;MAPRE1 protein;cDNA FLJ52068, highly similar to Microtubule-associated protein RP/EB family member 1	IPI00017596;IPI00910350	IPI00017596;IPI00910350	MAPRE1	Q15691;A2VCR0;B4DM33	0.0558822		1.23099	0.638584	1.40958	1.6448	2.34728	0.805873	1.5568	2.65661	3.12705	9	16	13	29.999	268	40.3	65.3	61.6	153.97	175.63	150.92	157.51	118.14	66.02	62.633	71.251	31.952	197.38	168.28	35.932	1984800	54823000	24436000	48665000	409810000	235380000	23170000	273240000	85599000
APC-binding protein EB2;End-binding protein 2;Microtubule-associated protein RP/EB family member 2;cDNA FLJ54006, highly similar to Microtubule-associated protein RP/EB family member 2;cDNA FLJ58487, highly similar to Microtubule-associated protein RP/EB family member 2;cDNA FLJ33626 fis, clone BRAMY2022160, highly similar to Microtubule-associated protein RP/EB family member 2	IPI00003420;IPI00916186;IPI00915767;IPI00903288;IPI00552652;IPI00640877	IPI00003420;IPI00916186;IPI00915767;IPI00903288;IPI00552652	MAPRE2;RP1	Q15555-1;Q15555;B4DJV4;B7Z2L3;B3KR39;Q15555-2	0.104753		2.77915	4.73232	1.70925	1.89588	6.86447	13.3302	26.581	3.2699	3.72148	1	3	3	37.031	327	5.2	15.9	15.9	153.98	148.34	198.33				22.293	44.707	40.157	126.41	80.495	18.187	84535	221510	98639	1244100	2303700	7813600	297230	1573600	1315500
APEX nuclease;Apurinic-apyrimidinic endonuclease 1;DNA-(apurinic or apyrimidinic site) lyase;Protein REF-1;APEX nuclease (Multifunctional DNA repair enzyme) 1;APEX nuclease (Multifunctional DNA repair enzyme) 1, isoform CRA_a;cDNA FLJ76713, highly similar to Homo sapiens APEX nuclease (multifunctional DNA repair enzyme) 1 (APEX1), transcript variant 2, mRNA;Full-length cDNA clone CS0DI036YP02 of …	IPI00215911;IPI00792538	IPI00215911	APE;APEX;APEX1;APX;HAP1;REF1;hCG_40473	P27695;Q5TZP7	0.217683		0.687281	0.784001	-0.026021	1.30386	1.61025	0.743386	1.7219	0.982125	2.46889	13	10	16	35.554	318	42.8	45.6	46.5	138.93	147.72	67.104	121.51	66.445	53.834	67.163	96.098	68.281	194.81	209.64	35.913	22258000	139810000	52679000	46199000	173970000	183620000	29389000	284190000	58075000
APG3-like;Autophagy-related protein 3;Protein PC3-96	IPI00022254;IPI00449201;IPI00946557;IPI00790600	IPI00022254;IPI00449201	APG3;APG3L;ATG3	Q9NT62-1;Q9NT62;Q9NT62-2	0.0781822		0.993752	0.869635	0.555439	1.55618	1.99136	0.767253	1.8272	1.46962	2.94074	3	3	4	35.864	314	9.2	9.2	17.5	93.047	83.626	110.09	73.549	68.526	24.349	52.594	59.668	24.906	50.254	72.313	20.795	3665700	22546000	8627200	2032500	18141000	2529400	3164800	3579100	5797500
APOBEC1-binding protein 1;Heterogeneous nuclear ribonucleoprotein A/B;cDNA FLJ60713, highly similar to Homo sapiens heterogeneous nuclear ribonucleoprotein A/B (HNRPAB), transcript variant 1, mRNA;Heterogeneous nuclear ribonucleoprotein AB isoform a variant;Putative uncharacterized protein HNRNPAB	IPI00334713;IPI00334587;IPI00742926;IPI00106509;IPI00329355	IPI00334713;IPI00334587;IPI00742926;IPI00106509;IPI00329355	ABBP1;HNRNPAB;HNRPAB	Q99729-3;Q99729;Q99729-2;B4DMY3;Q53F64;B5MD22;Q99729-4;Q99729-1	0.0382285	+	-1.43619	-0.964067	-1.96151	-1.383	0.369541	0.127927	0.51261	0.256759	0.383421	25	29	21	30.588	285	57.5	56.8	51.9	150.59	150.4	84.994	164.9	130.18	72.2	124.69	126.62	64.747	157.74	151.38	41.701	25995000	216390000	55276000	88723000	271330000	726460000	25332000	149130000	201170000
APOBEC1-binding protein 2;DnaJ homolog subfamily B member 11;DnaJ protein homolog 9;ER-associated DNAJ;ER-associated dnaJ protein 3;ER-associated Hsp40 co-chaperone;HEDJ;Human DnaJ protein 9;PWP1-interacting protein 4;cDNA FLJ42295 fis, clone TLIVE2008213, highly similar to DnaJ homolog subfamily B member 11;cDNA FLJ56253, highly similar to DnaJ homolog subfamily B member 11	IPI00008454;IPI00927297;IPI00797108	IPI00008454	DNAJB11;EDJ;ERJ3;HDJ9;PSEC0121;UNQ537/PRO1080	Q9UBS4;B3KW63	0.00119573	+	1.0286	0.961179	1.04249	1.08213	2.04004	0.0866257	1.9469	2.05977	2.11716	12	12	11	40.513	358	28.8	29.1	29.3	131.08	145.47	56.085	147.82	123.79	19.723	68.266	95.178	38.078	185.11	178.95	16.63	24134000	13720000	29446000	23435000	69736000	57500000	9975500	73564000	23513000
Apolipoprotein E;MRNA for apolipoprotein E (apo E);Apolipoprotein E3	IPI00021842;IPI00878953;IPI00879456;IPI00879368;CON__Q03247	IPI00021842;IPI00878953;IPI00879456;IPI00879368	APOE	P02649;Q6LBZ1;Q13791;Q6LA97;Q8TCZ8	0.182511		0.939824	1.13586	1.63478	0.04883	1.91829	1.0381	2.1975	3.1054	1.03443	30	27	25	36.154	317	65.9	71.9	51.1	156.59	154.9	106.79	200.87	126.64	79.943	99.369	124.95	73.52	225.91	133.58	29.943	41985000	145450000	76534000	112810000	701490000	466560000	62760000	251160000	306720000
Apopain;Caspase-3;Caspase-3 subunit p12;Caspase-3 subunit p17;Cysteine protease CPP32;Protein Yama;SREBP cleavage activity 1;Caspase 3, apoptosis-related cysteine peptidase, isoform CRA_b;Putative uncharacterized protein CASP3	IPI00292140;IPI00798166;IPI00553172;IPI00888838;IPI00887231	IPI00292140;IPI00798166	CASP3;CPP32;hCG_1786935	P42574;A8MVM1	0.878119		-0.0965371	-0.450616	-0.832201	0.993206	0.935275	0.780548	0.73173	0.561672	1.9906	6	3	5	31.608	277	12.3	10.8	15.2	121.62	119.93	85.741	155.31	94.325	61.486	54.776	62.353	17.629	124.4	129.12	18.396	486890	7049800	3010000	2787600	19732000	3856900	1602400	13168000	9313100
Apoptin-associating protein 1;Death effector domain-associated factor;RING1 and YY1-binding protein;YY1 and E4TF1-associated factor 1	IPI00946478;IPI00296594	IPI00946478;IPI00296594	DEDAF;RYBP;YEAF1	Q8N488	0.535313		-0.964916	-2.04329		0.113458	0.512308	0.59341	0.24261		1.08182	3	0	3	33.599	317	18.9	0	22.7	179.75	171.89	103.74	185.32	125.77	95.204				8.6737	22.083	13.409	3567600	1110500	538500	0	0	0	140110	5616800	4207900
Apoptosis response zinc finger protein;BRG1-associated factor 45D;D4, zinc and double PHD fingers family 2;Protein requiem;Zinc finger protein ubi-d4;cDNA FLJ54147, highly similar to Zinc-finger protein ubi-d4	IPI00023322;IPI00908945	IPI00023322;IPI00908945	BAF45D;DPF2;REQ;UBID4	Q92785;B4DT58	0.00803958	+	-0.704181	-0.579103	-0.74743	-0.786011	0.613791	0.0477488	0.66938	0.595664	0.579945	4	2	2	44.155	391	15.6	5.1	4.9	105.22	99.53	69.054	115.09	123.9	28.736	64.178	72.765	155.04				4632700	10140000	5638900	1127000	5459500	1621000	70887	1320800	228730
Apoptosis-antagonizing transcription factor;Protein AATF;Rb-binding protein Che-1	IPI00302238	IPI00302238	AATF;CHE1;DED;HSPC277	Q9NY61	0.51805		-0.49425	0.0288521	-1.01735		0.709931	0.372064	1.0202	0.494022		9	1	0	63.132	560	24.3	3	0	141.84	111.52	134.64	117.06	109.84	77.012							11916000	15488000	15614000	2228000	4008300	833910	0	0	0
Apoptosis-inducing factor 1, mitochondrial;Programmed cell death protein 8;Apoptosis-inducing factor;Striatal apoptosis-inducing factor;Apoptosis-inducing factor short isoform 3;Apoptosis-inducing factor short isoform 2	IPI00000690;IPI00157908;IPI00910786;IPI00300018;IPI00910617	IPI00000690;IPI00157908;IPI00910786	AIF;AIFM1;PDCD8	O95831-1;O95831;O95831-3;Q5RZ99;Q5RZA0;Q1L6K4;Q1L6K6	0.83632		0.0578597	-0.0440625	-0.30906	0.526701	1.04092	0.328972	0.96992	0.807168	1.44063	27	26	27	66.9	613	48.3	46.2	50.6	131.24	123.3	47.415	105.61	89.937	25.46	106.49	114.67	29.501	177.26	167.92	35.611	111490000	624620000	210510000	107220000	562500000	561120000	76548000	337860000	273970000
Apoptosis-stimulating of p53 protein 1;Protein phosphatase 1 regulatory subunit 13B	IPI00306903;IPI00445412;IPI00902966	IPI00306903	ASPP1;KIAA0771;PPP1R13B	Q96KQ4;B2RMX5	0.898303		-0.298859		-2.15377	1.55605	0.812895	1.92033		0.224724	2.94048	1	2	1	119.58	1090	0.7	1.6	1.5	125.38	72.917	181.83										0	0	0	125530	42082	345140	6229400	1355600	2752300
Apoptotic chromatin condensation inducer in the nucleus;cDNA FLJ50838, highly similar to Apoptotic chromatin condensation inducer in thenucleus;Putative uncharacterized protein DKFZp667N107	IPI00007334;IPI00911038;IPI00215975;IPI00297991	IPI00007334;IPI00911038;IPI00215975;IPI00297991	ACIN1;ACINUS;KIAA0670;DKFZp667N107	Q9UKV3-1;Q9UKV3;B4DQZ7;Q69YJ6;Q9UKV3-2;Q9UKV3-3	0.173136		-1.00106	-0.714184	-1.94054	-0.348459	0.499632	0.26717	0.60955	0.260518	0.785423	28	11	13	151.89	1341	23.3	10.1	10.8	138.03	117.26	89.995	127.35	104.47	55.801	104.94	71.947	88.021	150.68	80.266	75.32	18468000	28702000	22906000	21403000	23173000	13349000	17427000	96217000	113820000
APP secretase;Cathepsin B;Cathepsin B heavy chain;Cathepsin B light chain;Cathepsin B1;cDNA FLJ78235;cDNA FLJ59133, highly similar to Cathepsin B (EC 3.4.22.1);cDNA FLJ58073, moderately similar to Cathepsin B (EC 3.4.22.1);Putative uncharacterized protein DKFZp686N0152;cDNA FLJ40065 fis, clone TESOP2000400, highly similar to CATHEPSIN B (EC 3.4.22.1)	IPI00295741;IPI00909303;IPI00941296;IPI00788996	IPI00295741;IPI00909303;IPI00941296	CPSB;CTSB;DKFZp686N0152	P07858;A8K2H4;B4DMY4;Q6LAF9;B4DL49;Q5HYG5;B3KUJ8;Q8TAC7	0.298419		1.88461		0.930243	2.83898	3.69253	3.71198		1.9056	7.15512	0	7	8	37.821	339	0	23	25.4	81.196	102.43	121.04				34.531	47.921	28.446	156.18	143.54	50.164	0	0	0	11045000	46635000	39147000	3138600	30763000	8265000
Archain 1, isoform CRA_a;Coatomer subunit delta variant 2;Putative uncharacterized protein DKFZp686M09245;Archain;Coatomer subunit delta;Delta-coat protein;Archain 1, isoform CRA_b;cDNA, FLJ92603, Homo sapiens archain 1 (ARCN1), mRNA;Coatomer subunit delta variant 1;cDNA FLJ51620, highly similar to Coatomer subunit delta	IPI00298520;IPI00514053;IPI00915422;IPI00439944	IPI00298520;IPI00514053;IPI00915422	ARCN1;hCG_40220;DKFZp686M09245;COPD	B0YIW6;Q6MZV5;P48444;B0YIW5;B4E1X2	0.252569		0.388517	0.0179219	0.298371	0.849258	1.30905	0.407598	1.0125	1.22976	1.80157	11	9	9	61.626	552	18.8	19.9	22.8	131.27	126.01	100.02	91.935	86.135	25.865	133.63	125.96	58.595	203.32	186.3	50.152	13282000	20651000	25894000	51902000	102990000	37718000	6444100	25203000	30496000
Archvillin;p205/p250;Supervillin;cDNA FLJ60365, highly similar to Supervillin;cDNA FLJ53284, highly similar to Supervillin;cDNA FLJ53285, highly similar to Supervillin;SVIL protein;Putative uncharacterized protein DKFZp686A17191;Putative uncharacterized protein DKFZp586H1823	IPI00412650;IPI00018370;IPI00910367	IPI00412650;IPI00018370	SVIL;DKFZp686A17191;DKFZp586H1823	O95425-1;O95425;O95425-2;B4DXQ4;B4E3H1;B4E3N7;Q569J5;Q63HL8;Q659E9	0.182492		1.36597	1.39649	0.172441	2.52899	2.5775	2.36974	2.6326	1.12696	5.77167	2	2	8	247.74	2214	1.2	1.2	5.1	129.27	133.19	167.59	95.962	51.932	54.42	60.168	70.201	51.317	88.886	81.149	45.229	140390	900830	958750	161370	4598000	5893700	11862000	17244000	15224000
ARF-binding protein 1;E3 ubiquitin-protein ligase HUWE1;HECT, UBA and WWE domain-containing protein 1;Homologous to E6AP carboxyl terminus homologous protein 9;Large structure of UREB1;Mcl-1 ubiquitin ligase E3;Upstream regulatory element-binding protein 1;cDNA FLJ59294, highly similar to HECT, UBA and WWE domain-containing protein 1 (EC 6.3.2.-);HUWE1 protein;E3 ubiquitin protein ligase URE-B1 v…	IPI00179298;IPI00456919;IPI00643153;IPI00445401;IPI00746059;IPI00642197;IPI00872822;IPI00646975;REV__IPI00179757	IPI00179298;IPI00456919;IPI00643153;IPI00445401;IPI00746059	HSPC272;HUWE1;KIAA0312;KIAA1578;UREB1;RP3-339A18.4-005;RP3-339A18.4-002	Q7Z6Z7-1;Q7Z6Z7;Q7Z6Z7-3;Q7Z6Z7-2;B4DGF6;Q3B7K0;Q53FW4;Q5H935;Q5H924	0.453893		0.181984	0.296663	-0.202512	0.4518	1.13444	0.257302	1.2283	0.869036	1.36775	28	18	6	482.14	4376	8.1	6	2.1	110.47	112.86	81.573	62.396	93.997	45.724	61.273	91.161	44.505	75.058	61.863	28.596	6982500	28182000	24819000	10088000	60494000	37003000	25768000	15731000	104050000
Arf-GAP with Rho-GAP domain, ANK repeat and PH domain-containing protein 1;Centaurin-delta-2;ARAP1 protein	IPI00828080;IPI00639996;IPI00479190;IPI00646915;IPI00220421;IPI00925583;IPI00640351;IPI00941533	IPI00828080;IPI00639996;IPI00479190;IPI00646915;IPI00220421;IPI00925583;IPI00640351;IPI00941533	ARAP1;CENTD2;KIAA0782	Q96P48-6;Q96P48;Q96P48-3;B7ZMI2;Q96P48-1;Q96P48-4;Q96P48-2;Q96P48-5;B2RTS2;C9J823	0.293458		1.05774	-0.116035	0.838228	2.45103	2.08167	2.41359	0.92272	1.78785	5.46807	6	3	1	162.19	1450	5.7	3.1	1	85.105	95.233	87.385	14.144	64.38	57.517	18.233	95.054	69.883				949630	2927800	1707900	310200	680600	3518600	160160	730630	401610
Arg/Abl-interacting protein 2;Sorbin;Sorbin and SH3 domain-containing protein 2;Putative uncharacterized protein SORBS2;Sorbin and SH3 domain containing 2, isoform CRA_c;cDNA FLJ53348, highly similar to Homo sapiens sorbin and SH3 domain containing 2 (SORBS2), transcript variant 2, mRNA;cDNA FLJ54581, highly similar to Homo sapiens sorbin and SH3 domain containing 2 (SORBS2), transcript variant 1…	IPI00061793;IPI00477577;IPI00953656;IPI00923573;IPI00923611;IPI00903306;IPI00924446;IPI00924645;IPI00941528;IPI00382710;IPI00900295;IPI00927243;IPI00926362	IPI00061793;IPI00477577;IPI00953656;IPI00923573;IPI00923611;IPI00903306;IPI00924446	ARGBP2;KIAA0777;SORBS2;hCG_1787337	O94875-3;O94875;O94875-1;C9IZ89;C9JKV9;B7Z3X6;B7Z997;B3KPU4;C9JKA4	0.122647		2.51835		3.00961	2.02709	5.72926	2.81263		8.05348	4.07581	0	3	9	91.275	824	0	5.2	16.1	173.28	149.98	232.79				28.783	69.788	47.318	133.15	104.19	104.43	0	0	0	4117600	2472300	5655100	2456500	6798100	6723100
Arg/Glu/Asp-rich protein of 120 kDa;Protein S164;RNA-binding motif protein 25;RNA-binding protein 25;RNA-binding region-containing protein 7;U1 small nuclear ribonucleoprotein 1SNRP homolog protein	IPI00004273;IPI00925670;IPI00924634;IPI00926163	IPI00004273;IPI00925670	RBM25;RNPC7	P49756-1;P49756;Q16083;P49756-4	0.300355		0.450796	-0.0954654	0.417174	1.03068	1.36679	0.560618	0.93597	1.33531	2.04298	18	5	3	100.18	843	23.7	5.3	6	146.08	136.73	75.667	210.62	134.31	53.319	226.28	218.37	27.031	103.5	43.206	36.505	58002000	41944000	36541000	2055600	17261000	4952900	9128000	4678000	1796600
Arginase-1;Liver-type arginase;Type I arginase	IPI00398768;IPI00291560;IPI00038356	IPI00398768;IPI00291560;IPI00038356	ARG1	P05089-2;P05089;P05089-1;P05089-3	0.194952		2.96519	0.259664	5.61063	3.02527	7.80926	25.7496	1.1972	48.8615	8.14133	1	1	5	35.664	330	1.8	3.3	18.8	273.48	225.27	121.62							318.35	197.85	64.425	13639	299050	41692	7505600	636560	506720	8411800	6981100	5532700
Arginase-2, mitochondrial;Kidney-type arginase;Non-hepatic arginase;Type II arginase	IPI00020332	IPI00020332	ARG2	P78540;B2R690	0.401969		-0.584929	-0.126013	0.0595851	-1.68836	0.666682	0.391327	0.91636	1.04217	0.31028	4	4	2	38.577	354	17.5	18.6	11	137.62	95.874	88.508	125.28	123.77	11.203	52.046	54.886	19.288	68.597	51.231	17.366	3972800	8132600	12471000	3098100	39883000	22172000	895530	5377400	2081500
Arginine and glutamate-rich protein 1	IPI00478834;IPI00554462;IPI00844406;IPI00908538	IPI00478834;IPI00554462	ARGLU1	Q9NWB6-1;Q9NWB6	0.340353		0.408604	-0.19243	0.476378	0.941864	1.3274	0.522954	0.87513	1.39125	1.92101	4	1	1	33.216	273	11.4	2.9	3.3	164.38	155.1	56.568	115.51	35.019	97.787							1671200	2655300	4064400	105650	782240	199900	2144000	2546100	6624800
Arginine/proline-rich coiled-coil domain-containing protein 1;MAP7 domain-containing protein 1;Proline/arginine-rich coiled-coil domain-containing protein 1;Putative uncharacterized protein MAP7D1;MAP7D1 protein;cDNA FLJ39022 fis, clone NT2RP7003724, weakly similar to Serine/arginine repetitive matrix protein 1	IPI00654605;IPI00867630;IPI00645814;IPI00167009;IPI00827687;IPI00030012	IPI00654605;IPI00867630;IPI00645814	KIAA1187;MAP7D1;PARCC1;PP2464;RPRC1	Q3KQU3-1;Q3KQU3;C9JIR3;Q6NX58;Q3KQU3-4;B3KU03;Q3KQU3-2	0.0339978	+	3.02949	3.57616	3.62904	1.88326	8.16519	4.88977	11.927	12.3723	3.68908	1	1	3	92.819	841	1.4	1.4	4.5	175.74	148.03	207.3							199.44	195.03	68.551	651220	720750	290720	254390	225680	217430	4309300	3233900	14163000
Arginine/serine-rich-splicing factor 14;Putative splicing factor, arginine/serine-rich 14;cDNA FLJ76836, highly similar to Homo sapiens splicing factor, arginine/serine-rich 14 (SFRS14), transcript variant 2, mRNA;Putative uncharacterized protein SFRS14;cDNA FLJ55365, highly similar to splicing factor, arginine/serine-rich14	IPI00554436;IPI00158020;IPI00293162;IPI00554438;IPI00643601;IPI00910799	IPI00554436;IPI00158020;IPI00293162;IPI00554438;IPI00643601;IPI00910799	KIAA0365;SFRS14	Q8IX01-3;Q8IX01;A8K5G0;Q8IX01-1;C9JI71;Q8IX01-4;B4DSQ4	0.572388		-0.773753	0.220454	-3.0797	0.53799	0.584894	0.701994	1.1651	0.118282	1.45195	11	6	2	121.31	1092	13.4	7.6	2.4	154.73	115.32	130.1	139.15	87.788	24.027	112.69	133.76	147.46	77.552	109.13	31.583	14158000	12062000	13681000	10504000	4591700	3914200	23389000	5782100	48552000
Arginine-rich 54 kDa nuclear protein;Splicing factor, arginine/serine-rich 11;Splicing factor, arginine/serine-rich 11, isoform CRA_b;SFRS11 protein;Putative uncharacterized protein DKFZp686M13204;Putative uncharacterized protein DKFZp686D02116;Putative uncharacterized protein DKFZp686P22142	IPI00464952;IPI00641287;IPI00641957;IPI00641842;IPI00910208;IPI00908907	IPI00464952;IPI00641287;IPI00641957;IPI00641842	SFRS11;hCG_22837;RP4-677H15.3-002;DKFZp686M13204;RP4-677H15.3-003;RP4-677H15.3-004;DKFZp686D02116;DKFZp686P22142	Q05519;Q8IWE6;Q05BU6;Q5HYN2;Q5T760;Q6PJB9;Q6PJY9;Q6PKC9;Q5T757;Q6MZM2;Q6N079	0.856306		0.0413767	0.221568	-0.138814		1.0291	0.182246	1.166	0.908265		3	1	1	53.542	484	8.1	3.5	3.5	72.817	70.998	49.613	22.999	29.244	21.96							2100900	3654700	5148100	268040	1979800	421930	0	165600	0
Arginine--tRNA ligase;Arginyl-tRNA synthetase, cytoplasmic;cDNA, FLJ95667, highly similar to Homo sapiens arginyl-tRNA synthetase (RARS), mRNA;cDNA FLJ50285, highly similar to Arginyl-tRNA synthetase (EC 6.1.1.19);Arginyl-tRNA synthetase variant	IPI00004860;IPI00759723;REV__IPI00306611;REV__IPI00945877;REV__IPI00945598;REV__IPI00908898;REV__IPI00946759	IPI00004860;IPI00759723	RARS	P54136-1;P54136;B2RBS9;B4DXW6;Q53GY4;P54136-2	0.267818		-0.127726	-0.138648	-0.267476	0.0229473	0.915273	0.0930363	0.90837	0.830772	1.01603	21	24	14	75.378	660	41.1	41.1	25.6	98.33	108.26	73.426	97.119	101.66	30.413	79.382	88.381	33.271	138.56	149.39	33.915	48499000	70531000	100480000	145640000	193260000	192170000	2110700	3403300	7336100
Argininosuccinate synthase;Citrulline--aspartate ligase;cDNA FLJ54252, highly similar to Argininosuccinate synthase (EC 6.3.4.5)	IPI00020632;IPI00909521;IPI00640430;IPI00514341;IPI00642128;IPI00941527;IPI00844382	IPI00020632;IPI00909521	ASS;ASS1;hCG_31245;RP11-618A20.2-002	P00966;A8KAP9;Q5T6L4;B4E395	0.94818		0.0440893	-0.840035	-0.218595	1.1909	1.03103	0.92107	0.55863	0.859402	2.28295	7	10	3	50.817	450	13.8	16.2	8.9	123.94	120.67	155.2	141.86	83.375	30.037	46.656	57.384	22.579	248.01	224.09	57.672	11315000	8034500	4710600	6088500	20493000	11446000	1186500	13446000	1307700
ARM protein lost in epithelial cancers on chromosome X 1;Armadillo repeat-containing X-linked protein 1;Putative uncharacterized protein DKFZp686P06199	IPI00009908	IPI00009908	AD032;ALEX1;ARMCX1;DKFZp686P06199	Q9P291;Q68D26	0.807205		-0.0774539	0.0396999	-0.608052	0.335991	0.947729	0.305668	1.0279	0.656082	1.26224	13	8	10	49.18	453	32.7	17	26.7	129.78	110.72	58.842	105.84	82.604	21.98	87.187	73.714	61.734	153.86	103.89	43.385	21645000	20658000	111210000	11443000	75670000	57343000	17556000	97054000	58227000
ARM protein lost in epithelial cancers on chromosome X 2;Armadillo repeat-containing X-linked protein 2;cDNA FLJ76303, highly similar to Homo sapiens armadillo repeat containing, X-linked 2 (ARMCX2), mRNA	IPI00006142;IPI00643546;IPI00647957;IPI00641716;IPI00642670;IPI00647371	IPI00006142	ALEX2;ARMCX2;KIAA0512	Q7L311;A8K5M7	0.966193		-0.00869565	-0.169258	-0.210888	0.354059	0.993991	0.23215	0.8893	0.864006	1.27815	16	10	8	65.683	632	28.3	17.1	11.6	140.25	129.35	87.939	145.02	145.93	54.184	88.419	92.297	71.48	136.66	106.91	21.362	13351000	58596000	20748000	7961100	47416000	32859000	19719000	57807000	55893000
ARM protein lost in epithelial cancers on chromosome X 3;Armadillo repeat-containing X-linked protein 3;cDNA FLJ75682, highly similar to Homo sapiens armadillo repeat containing, X-linked 3 (ARMCX3), transcript variant 1, mRNA	IPI00009906	IPI00009906	ALEX3;ARMCX3;BM-017;UNQ2517/PRO6007	Q9UH62;A8K5B0	0.0258884	+	1.39099	1.01057	1.36264	1.79977	2.62259	0.74053	2.0147	2.57155	3.48165	8	9	7	42.5	379	26.4	23.5	22.7	109.57	115.69	85.258	86.366	81.704	31.597	56.058	83.666	19.281	127.54	150.69	32.941	5867300	7618200	26924000	10257000	47018000	59638000	7452200	6552500	11094000
Armadillo repeat protein deleted in velo-cardio-facial syndrome;Armadillo repeat gene deletes in velocardiofacial syndrome;Armadillo repeat gene deletes in velocardiofacial syndrome, isoform CRA_b;ARVCF protein;Putative uncharacterized protein ARVCF;cDNA FLJ35345 fis, clone PROST2016351, moderately similar to P120 PROTEIN	IPI00010490;IPI00879055;IPI00220492;IPI00879180	IPI00010490;IPI00879055;IPI00220492;IPI00879180	ARVCF;hCG_17887	O00192-1;O00192;B9EH95;Q05BN6;O00192-2;C9JJX6;Q8NAH4	0.216053		1.62286	2.19579		1.04993	3.07985	1.77552	4.5814		2.07044	2	0	1	104.64	962	3.2	0	1.7	123.03	123.7	87.265	114.77	229.83	108.73							6537400	1360300	15495000	0	0	0	236420	439400	209650
Armadillo repeat-containing protein 1;cDNA FLJ57447, highly similar to Armadillo repeat-containing protein 1	IPI00018260;IPI00909723	IPI00018260;IPI00909723	ARCP;ARMC1	Q9NVT9;B4E2W7	0.423412		0.429871	0.886745	-0.431035	0.833902	1.34711	0.620977	1.849	0.74173	1.7825	3	2	1	31.28	282	17.4	13.1	7.4	137.07	145.21	35.854	97.668	73.023	41.264	64.302	74.158	19.84				3803200	6502500	4538400	7287800	25704000	4874000	202700	1053800	1516100
Arrestin beta-1;Beta-arrestin-1;cDNA FLJ75454, highly similar to Homo sapiens arrestin, beta 1 (ARRB1), transcript variant 1, mRNA	IPI00293857;IPI00943289;IPI00336017;IPI00908307;IPI00786904;IPI00180375;IPI00783893;IPI00395607;IPI00793794;IPI00795723	IPI00293857;IPI00943289;IPI00336017	ARR1;ARRB1	P49407-1;P49407;A8K103;C9JSF3;P49407-2;B6V9G8	0.958467		0.0292684	-0.124566	-0.745797	0.958168	1.02049	0.703308	0.91728	0.596338	1.94284	2	2	2	47.065	418	6.2	4.5	8.1	120.37	107.4	67.021	90.765	77.952	104.32	21.109	10.421	0.34348	89.788	44.702	24.185	672540	3448000	1221000	542930	3028200	5136300	1148300	5111200	3411800
Arsenical pump-driving ATPase;Arsenite-stimulated ATPase;ATPase ASNA1;hARSA-I;hASNA-I;Transmembrane domain recognition complex 40 kDa ATPase subunit;cDNA FLJ60230, highly similar to Arsenical pump-driving ATPase (EC 3.6.3.16)	IPI00013466;IPI00910220	IPI00013466;IPI00910220	ARSA;ASNA1;TRC40	O43681;B4DEE5	0.00141966	+	0.53116	0.571143	0.508896	0.51344	1.44509	0.0349986	1.4857	1.42296	1.42745	9	10	6	38.792	348	33	39.7	19	94.054	83.911	88.54	79.837	88.163	22.95	67.474	65.961	20.373	102.28	107.91	23.035	12816000	14196000	26230000	27857000	160800000	153210000	1483000	2726200	5725900
Arsenite-resistance protein 2;Serrate RNA effector molecule homolog	IPI00375144;IPI00888510;IPI00220038;IPI00888085;IPI00927582;IPI00925539;IPI00414434;IPI00925336;IPI00924874;IPI00925189;IPI00867741	IPI00375144;IPI00888510;IPI00220038;IPI00888085;IPI00927582;IPI00925539	ARS2;ASR2;SRRT	Q9BXP5-1;Q9BXP5;Q9BXP5-3;Q9BXP5-2;Q9BXP5-4;Q9BXP5-5;C9J399	0.644032		0.137301	0.237441	-0.345623	0.520087	1.09985	0.325938	1.1789	0.786968	1.43404	27	18	9	100.67	876	26.6	19.1	12.6	114.84	106.75	51.625	107.97	82.088	36.523	73.847	85.701	27.856	138.33	105.83	36.02	19663000	59846000	54474000	10786000	73078000	41354000	2063000	10871000	21742000
Aryl hydrocarbon receptor-associated protein 3;Influenza virus NS1A-binding protein;cDNA FLJ10411 fis, clone NT2RP1000035, highly similar to Homo sapiens influenza virus NS1A binding protein (IVNS1ABP), transcript variant 1, mRNA;cDNA FLJ12958 fis, clone NT2RP2005539, highly similar to Homo sapiens influenza virus NS1A binding protein (IVNS1ABP), transcript variant 1, mRNA;cDNA FLJ36593 fis, clon…	IPI00014319;IPI00871928;IPI00844107;IPI00514639	IPI00014319	ARA3;FLARA3;HSPC068;IVNS1ABP;KIAA0850;NS1;NS1BP;DKFZp686K06216	Q9Y6Y0;B3KM71;B3KMY8;B3KSM1;Q6MZF3	0.392272		-0.939843	-0.274286	-1.6054		0.52129	0.352291	0.82686	0.328645		2	1	0	71.729	642	3.3	1.1	0	98.704	169.21	90.882	63.496	55.903	53.392							1467800	2533400	3506800	904090	1323500	491470	0	0	0
Arylacetamide deacetylase-like 1;Neutral cholesterol ester hydrolase 1	IPI00924788;IPI00002230;IPI00925612;IPI00790972;IPI00789769;IPI00337305;IPI00953258;IPI00554603	IPI00924788;IPI00002230;IPI00925612;IPI00790972	AADACL1;KIAA1363;NCEH1	Q6PIU2-2;Q6PIU2;C9J0X0;Q6PIU2-1;Q6PIU2-3	0.458712		-0.561974	-0.0685442	-1.0554		0.677375	0.334064	0.9536	0.481162		1	2	0	49.881	448	3.6	4.9	0	77.652	64.034	113.25				85.915	87.77	25.718				843250	599500	798560	439030	825790	423460	0	0	0
Arylsulfatase A;Putative uncharacterized protein DKFZp686G12235;Arylsulfatase A component B;Arylsulfatase A component C;Cerebroside-sulfatase	IPI00329685;IPI00744184;IPI00853468;IPI00909705	IPI00329685;IPI00744184;IPI00853468	ARSA;DKFZp686G12235	B7XD04;Q63HL5;P15289;C9IYR4	0.00249716	+	2.75571	3.02936	2.58823	2.64955	6.75386	1.17373	8.1645	6.01359	6.27471	2	6	5	53.806	509	4.9	15.5	12.8	124.33	119.45	164.43	35.29	41.548	15.985	101.34	107.62	39.813	73.711	74.649	79.554	383680	2040100	2406900	37360000	30238000	40233000	12892000	11669000	10862000
Arylsulfatase B;N-acetylgalactosamine-4-sulfatase;cDNA FLJ76497, highly similar to Homo sapiens arylsulfatase B (ARSB), transcript variant 2, mRNA;Arylsulfatase B, isoform CRA_b	IPI00306576;IPI00413690	IPI00306576;IPI00413690	ARSB;hCG_37743	P15848;A8K4A0;Q8N322	0.0169268	+	2.06297	1.72718	2.60121	1.8605	4.17844	1.50786	3.3108	6.06796	3.63135	3	4	3	59.687	533	8.1	8.4	7.5	124.84	115.21	150.68	34.3	46.844	16.124	65.663	63.241	65.026	101.23	161.31	68.319	5770000	2128700	2030200	8349200	10016000	8005600	2988700	3384200	6489800
Asparagine synthetase [glutamine-hydrolyzing];Cell cycle control protein TS11;Glutamine-dependent asparagine synthetase;cDNA FLJ51768, highly similar to Asparagine synthetase (glutamine-hydrolyzing) (EC 6.3.5.4);cDNA FLJ51387, highly similar to Asparagine synthetase (glutamine-hydrolyzing) (EC 6.3.5.4);cDNA, FLJ79123, highly similar to Asparagine synthetase (glutamine-hydrolyzing) (EC 6.3.5.4)	IPI00554777;IPI00925572;IPI00924906;IPI00926480;IPI00925298;IPI00926959	IPI00554777;IPI00925572;IPI00924906	ASNS;TS11	P08243;A4D1I8;B4DXZ1;B4DY32;B7ZAA9	0.622684		-0.368113	0.178492	-0.914718		0.774795	0.42515	1.1317	0.530448		3	2	0	64.369	561	4.1	3.6	0	76.415	72.381	65.876	35.179	11.388	38.327	18.102	14.36	26.823				839260	702900	1228100	612580	6068900	1519000	0	0	0
Asparagine--tRNA ligase;Asparaginyl-tRNA synthetase, cytoplasmic;cDNA FLJ52703, highly similar to Asparaginyl-tRNA synthetase, cytoplasmic (EC6.1.1.22)	IPI00306960;IPI00643900;IPI00646656;IPI00647678;REV__IPI00298306;REV__IPI00736184;REV__IPI00289986	IPI00306960	ASNS;NARS	O43776;B4DN60	0.0329176	+	0.545556	0.616264	0.345399	0.675005	1.45958	0.172844	1.5329	1.2705	1.5966	12	11	7	62.942	548	20.3	20.4	14.8	122.04	117.9	101.11	104.01	82.183	27.897	59.483	69.191	49.946	66.765	62.644	29.921	31439000	107950000	55836000	39518000	124490000	261440000	39003000	454900000	160120000
Asparagine--tRNA ligase;Probable asparaginyl-tRNA synthetase, mitochondrial;cDNA, FLJ96480;cDNA FLJ32418 fis, clone SKMUS2000863, weakly similar to PROBABLE ASPARAGINYL-TRNA SYNTHETASE (EC 6.1.1.22);cDNA: FLJ23441 fis, clone HSI00612	IPI00101664	IPI00101664	NARS2	Q96I59;B2RD66;B3KPX5;Q9H5H1	0.101675		-1.18645	-0.995333	-1.37757		0.439383	0.0825568	0.50162	0.384867		3	3	0	54.076	477	5.7	7.3	0	138.45	127.43	115.26				57.038	80.158	19.119				748020	2158700	509300	3211000	9227200	3523400	0	0	0
Asparaginyl endopeptidase;Legumain;Protease, cysteine 1;cDNA FLJ78452, highly similar to Homo sapiens legumain (LGMN), transcript variant 2, mRNA;cDNA FLJ53058, highly similar to Legumain (EC 3.4.22.34);cDNA FLJ53066, highly similar to Legumain (EC 3.4.22.34);cDNA FLJ78453, highly similar to Homo sapiens legumain (LGMN), transcript variant 2, mRNA;Full-length cDNA clone CS0DI011YN22 of Placenta o…	IPI00293303;IPI00384156;IPI00384155	IPI00293303;IPI00384156;IPI00384155	LGMN;PRSC1;hCG_21254	Q99538;A8K669;B7Z4A4;B7Z4S8;Q53XC6;Q6I9U9;Q96CY7;Q86TV3;Q86TV2	0.402723		-1.92124	-0.512781	-3.3297		0.264028	0.425259	0.70087	0.0994629		1	4	0	49.411	433	3	11.5	0	150.04	97.802	147.03				79.734	111.3	37.958				30236	235480	56206	5046700	4006100	8137900	0	0	0
Aspartate aminotransferase, cytoplasmic;Glutamate oxaloacetate transaminase 1;Transaminase A;cDNA FLJ51134, highly similar to Aspartate aminotransferase, cytoplasmic (EC 2.6.1.1);Growth-inhibiting protein 18;cDNA FLJ53826, highly similar to Aspartate aminotransferase, cytoplasmic (EC 2.6.1.1)	IPI00219029;IPI00922421	IPI00219029;IPI00922421	GOT1;GIG18	P17174;B7Z7E9;Q2TU84;B7Z1I2	0.00197576	+	2.9674	2.76103	2.92774	3.21344	7.82127	1.2715	6.7788	7.60919	9.27558	16	26	25	46.247	413	46.5	64.4	63.4	152.15	152.5	220.51	68.729	61.782	22.63	90.629	97.94	25.616	227.59	165.76	55.288	44503000	138810000	67007000	63695000	299010000	242970000	36639000	153620000	77995000
Aspartate aminotransferase, mitochondrial;Fatty acid-binding protein;Glutamate oxaloacetate transaminase 2;Plasma membrane-associated fatty acid-binding protein;Transaminase A;cDNA FLJ78439, highly similar to Homo sapiens glutamic-oxaloacetic transaminase 2;cDNA FLJ40994 fis, clone UTERU2015640, highly similar to Aspartate aminotransferase, mitochondrial (EC 2.6.1.1);cDNA FLJ55692, highly similar…	IPI00018206;IPI00910267;IPI00908623	IPI00018206;IPI00910267	GOT2	P00505;A8K482;B3KUZ8;B4DJA6	0.424919		0.305767	0.692249	0.526992	-0.301939	1.23608	0.423207	1.6158	1.44092	0.811162	25	29	19	47.475	430	60.7	66.7	48.1	113.81	110.48	54.884	108.34	94.817	38.444	67.851	81.391	31.546	186.63	151.92	31.74	94006000	787870000	288740000	94572000	873040000	847970000	52221000	326090000	374870000
Aspartate beta-hydroxylase;Aspartyl/asparaginyl beta-hydroxylase;Peptide-aspartate beta-dioxygenase;cDNA FLJ77157, highly similar to Homo sapiens aspartate beta-hydroxylase (ASPH), transcript variant 3, mRNA;Aspartate beta-hydroxylase isoform f;cDNA FLJ54576, highly similar to Aspartyl/asparaginyl beta-hydroxylase (EC 1.14.11.16)	IPI00294834;IPI00944640;IPI00941148;IPI00032449;IPI00746217;IPI00396582;IPI00433478;IPI00796966;IPI00032453;IPI00944646;IPI00909538;IPI00921959;IPI00910043;IPI00024572;IPI00032450	IPI00294834;IPI00944640	ASPH	Q12797;A8K721;B3GQE5;B8Y0L3;B4E2K4	0.811449		0.0421062	-0.189187	-0.0211954	0.336701	1.02962	0.198966	0.8771	0.985416	1.26287	14	16	4	85.862	758	23.4	23	8.4	95.328	113.63	115.63	70.352	163.48	165.74	105.95	65.619	85.9	208.1	208.93	36.404	31457000	26528000	20932000	11545000	26661000	22449000	448310	2960800	3179700
Aspartate carbamoyltransferase;CAD protein;Dihydroorotase;Glutamine-dependent carbamoyl-phosphate synthase;Putative uncharacterized protein CAD	IPI00301263;IPI00893035;IPI00893143;IPI00893407;IPI00894050;IPI00029263	IPI00301263;IPI00893035	CAD	P27708;Q53SY7;Q53SZ4;Q96CK3	0.0521532		-0.565761	-0.81591	-0.354903	-0.52647	0.675599	0.107513	0.56805	0.781922	0.694252	25	12	6	242.98	2225	14.3	6.5	3	112.19	108.09	68.501	98.358	90.827	62.463	44.68	112.55	100.04	54.917	74.242	31.849	10557000	41505000	20165000	6392600	45279000	28162000	50289000	61062000	31154000
Aspartate--tRNA ligase;Aspartyl-tRNA synthetase, cytoplasmic;Cell proliferation-inducing gene 40 protein;Putative uncharacterized protein DARS;Putative uncharacterized protein DKFZp781B11202	IPI00216951;IPI00917783;IPI00917492;IPI00917399;IPI00917920;IPI00917615	IPI00216951	DARS;PIG40;DKFZp781B11202	P14868;Q53R85;Q53T60;Q68CR9	0.494647		-0.0806936	-0.102573	-0.237441	0.0979341	0.945603	0.112156	0.93137	0.848248	1.07024	23	19	4	57.136	501	51.7	48.3	12	108.82	106.52	73.669	116.19	125.34	31.296	90.016	97.311	17.379	151.35	172.93	70.972	73103000	115760000	78097000	51695000	204740000	162280000	6272900	19678000	42345000
Aspartate--tRNA ligase;Aspartyl-tRNA synthetase, mitochondrial;cDNA FLJ76156, highly similar to Homo sapiens aspartyl-tRNA synthetase 2 (DARS2), mRNA;cDNA FLJ12692 fis, clone NT2RM4002623, weakly similar to ASPARTYL-TRNA SYNTHETASE (EC 6.1.1.12);cDNA FLJ10514 fis, clone NT2RP2000710, weakly similar to ASPARTYL-TRNA SYNTHETASE (EC 6.1.1.12)	IPI00100460;IPI00843782	IPI00100460	DARS2	Q6PI48;A8K4A8;Q9H9J7;Q9NVT8	0.199555		-0.91677	-0.619603	-1.21394		0.529693	0.155394	0.65085	0.43109		6	5	0	73.562	645	11.8	7.4	0	143.13	126.71	97.249	149.21	104.03	79.279	89.134	97.65	11.032				8332200	6852900	25988000	7138500	19602000	5841300	0	0	0
[truncated: 2,335 more rows]

## Sheet: 1.5x up-reg, p<0.05
Protein Names	Protein IDs	Majority Protein IDs	Gene Names	Uniprot	t-test p-value	significantly regulated	log2 mean Ratio d35/d0	Replicate1 log2 (Ratio d35/d0 Normalized)	Replicate2 log2 (Ratio d35/d0 Normalized)	Replicate3 log2 (Ratio d35/d0 Normalized)	mean Ratio d35/d0	standard deviation	Replicate1 Ratio d35/d0 Normalized	Replicate2 Ratio d35/d0 Normalized	Replicate3 Ratio d35/d0 Normalized	Replicate1 Peptides	Replicate2 Peptides	Replicate3 Peptides	Mol. Weight [kDa]	Sequence Length	Replicate1 Sequence Coverage [%]	Replicate2 Sequence Coverage [%]	Replicate3 Sequence Coverage [%]	Ratio M/L Variability [%]	Ratio H/L Variability [%]	Ratio H/M Variability [%]	Replicate1 Ratio M/L Variability [%]	Replicate1 Ratio H/L Variability [%]	Replicate1 Ratio H/M Variability [%]	Replicate2 Ratio M/L Variability [%]	Replicate2 Ratio H/L Variability [%]	Replicate2 Ratio H/M Variability [%]	Replicate3 Ratio M/L Variability [%]	Replicate3 Ratio H/L Variability [%]	Replicate3 Ratio H/M Variability [%]	Replicate1 Intensity L	Replicate1 Intensity M	Replicate1 Intensity H	Replicate2 Intensity L	Replicate2 Intensity M	Replicate2 Intensity H	Replicate3 Intensity L	Replicate3 Intensity M	Replicate3 Intensity H
[truncated: 330 more rows]

[truncated: 1 more sheets: 1.5x down-reg, p<0.05]
